# Supplementary material
Source: MDPI journal article supplement (https://www.mdpi.com/2076-3263/13/6/181)
Supplement: s1 [file s1]

Archive with 3 entries (3 files):
- Supplemental File S1 - location information.pdf
- Supplemental File S2 - DZ PDPs.pdf
- Supplemental File S3 - U-Pb_DZ_data.xlsx
