# Supplementary material
Source: MDPI journal article supplement (https://www.mdpi.com/2076-3263/13/6/181)
Supplement: s1 [file s1 › Supplemental File S1 - location information.pdf]

## Supplementary File S1 - Sample and measured section location information

| Sample ID     | Member             | Geographic Location              | Latitude         | Longitude        |
|---------------|--------------------|----------------------------------|------------------|------------------|
| PC1L-3.5m     | Polychrome Member  | Polychrome Mountain              | 63.52468° N      | -149.9849° W     |
| CANT-BASE-PC  | Polychrome Member  | Polychrome Mountain              | 63.5362° N       | -149.8858° W     |
| CANT-TOP-PC   | Polychrome Member  | Polychrome Mountain              | 63.5433° N       | -149.8905° W     |
| CANT-PC1-COMP | Polychrome Member  | Polychrome Mountain (South side) | N/A (composite)* | N/A (composite)* |
| 070618BK-01   | Polychrome Member  | Polychrome Mountain              | 63.54979° N      | -149.90892° W    |
| 0716MR-02     | Polychrome Member  | Tattler Creek                    | 63.5773° N       | -149.6806° W     |
| 0816MR-01     | Polychrome Member  | Big Creek                        | 63.6384° N       | -149.6190° W     |
| 071920BK-01   | Polychrome Member  | Mt. Sheldon                      | 63.58494° N      | -150.11650° W    |
| 070418BK-01   | Cabin Creek Member | Cabin Divide                     | 63.5915° N       | -149.9277° W     |
| 070819BK-02   | Cabin Creek Member | Cabin Divide                     | 63.57495° N      | -149.91653° W    |
| 081019BK-01   | Cabin Creek Member | Igloo Creek                      | 63.62935° N      | -149.57198° W    |
| CANT-DM1-COMP | Cabin Creek Member | Double Mountain (North side)     | N/A (composite)* | N/A (composite)* |
| CANT-PA1-COMP | Cabin Creek Member | Panorama Mountain (South side)   | N/A (composite)* | N/A (composite)* |

\*Composite samples are comprised of sandstone samples from throughout a given measured section. Therefore, they represent the entire section rather than a single sandstone bed/stratigraphic location. See text for details.

Note: the datum used for recording latitude/longitude of all samples is NAD83 Alaska Albers.

| Measured section | Base Lat/Long             | Top Lat/Long              |
|------------------|---------------------------|---------------------------|
| PC1L             | 63.52468° N/ -149.9849° W | 53.5258° N/-149.98435°W   |
| PC1**            | 63.5362° N/-149.8858° W   | 63.5433° N/-149.8905° W   |
| RC1              | 63.54597° N/-149.90922° W | 63.55201° N/-149.90872° W |
| EF2              | 63.57751° N/-149.85367° W | 63.57753° N/-149.85367° W |
| CAB01            | 63.59163° N/-149.92357° W | 63.59280° N/-149.92479° W |

\*\* Data from Trop (1996) and Ridgway et al. (1997)

Note: Location data are only recorded for measured sections that comprise the composite type section.

The locations of other measured sections referenced in this manuscript are shown in maps by Trop (1996) and Ridgway et al. (1997).
