# Supplementary material
Source: MDPI journal article supplement (https://www.mdpi.com/2076-3263/13/6/181)

Supplementary File S2 - Detrital zircon probability density plots by sample

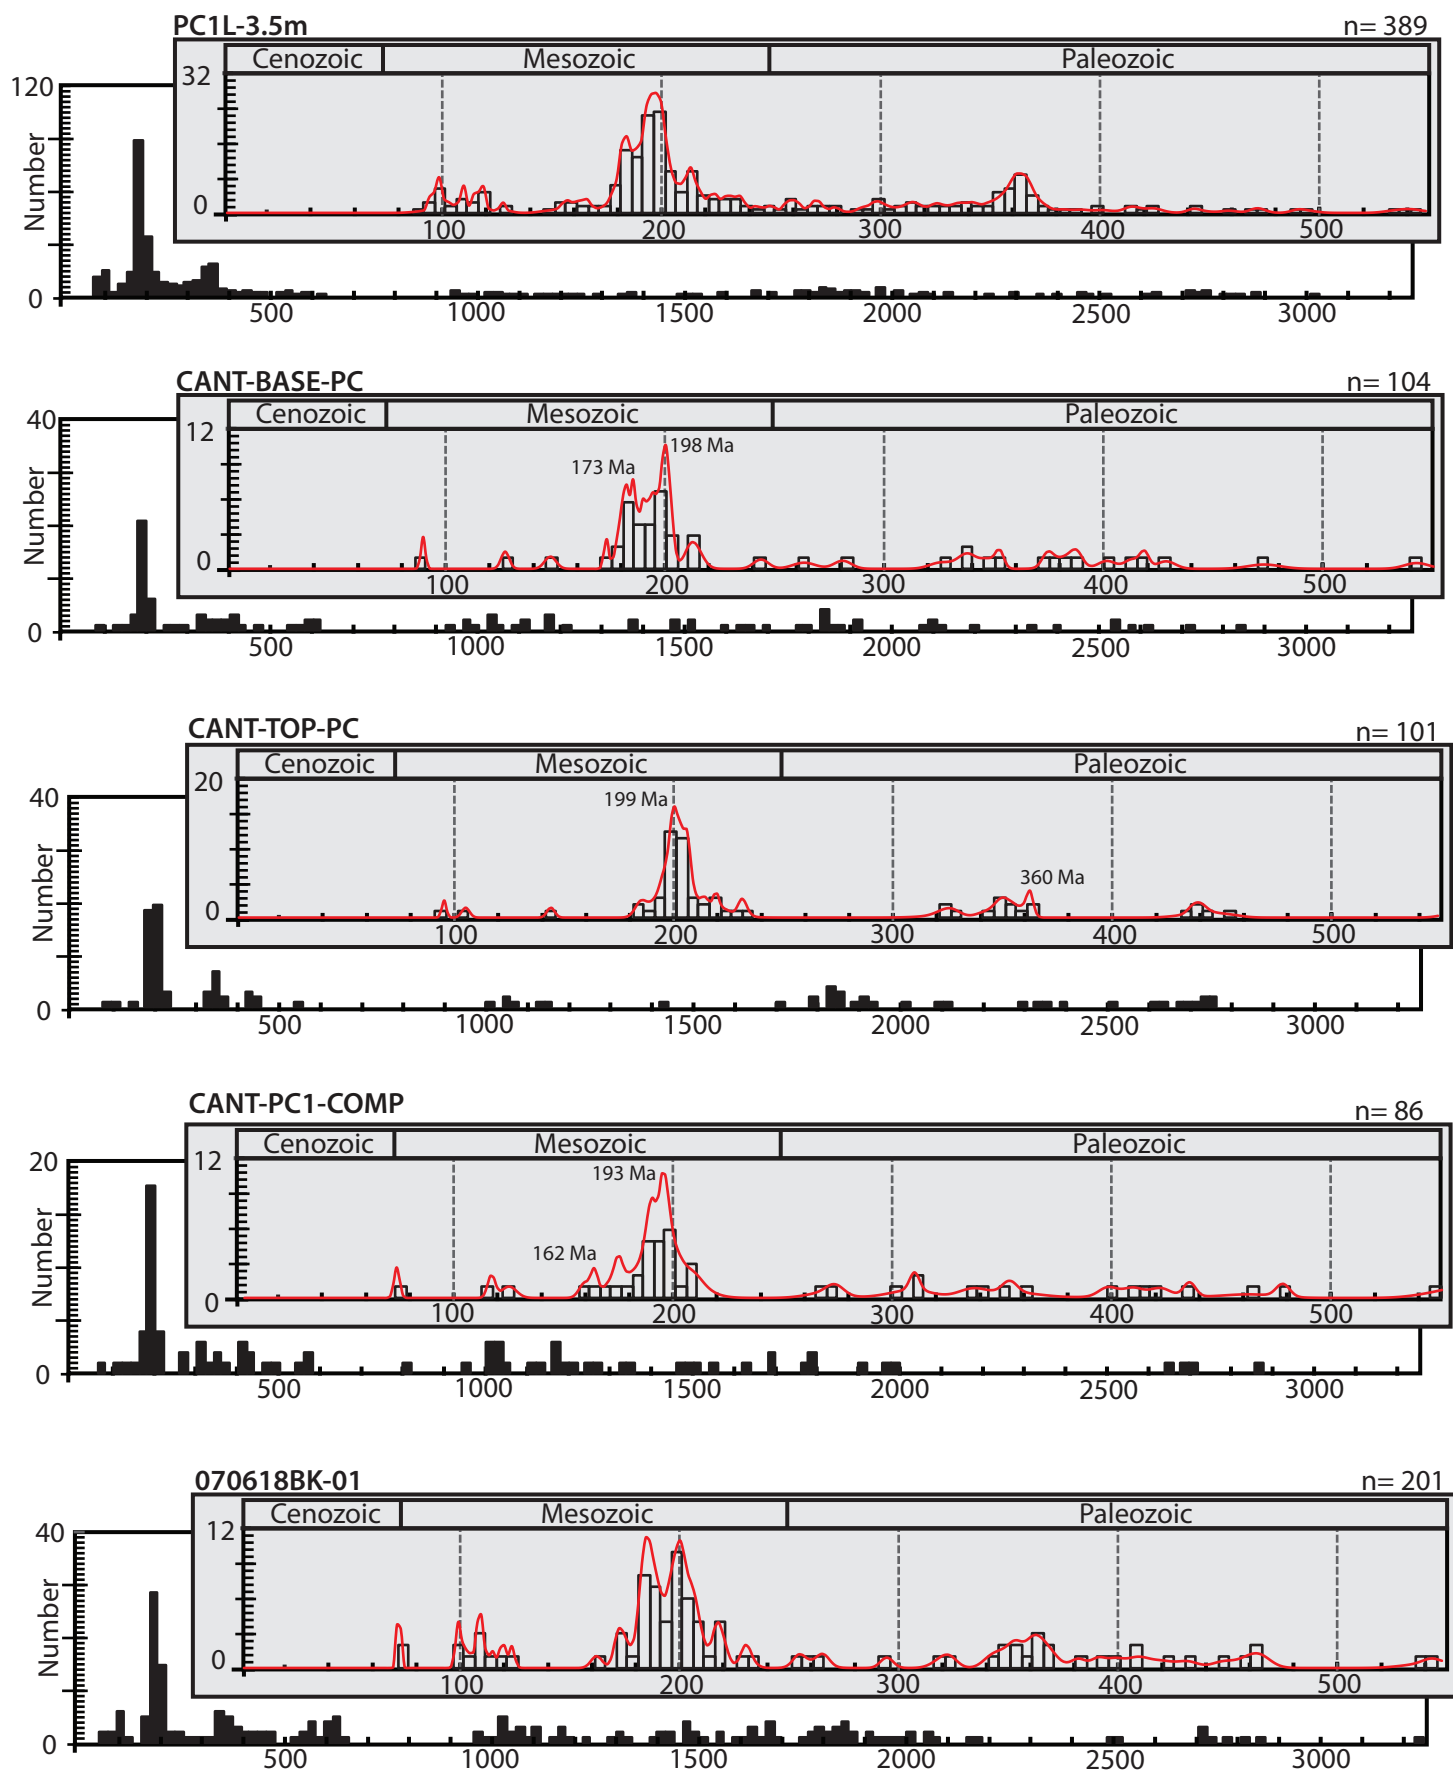

Supplementary File S2 - Detrital zircon probability density plots by sample

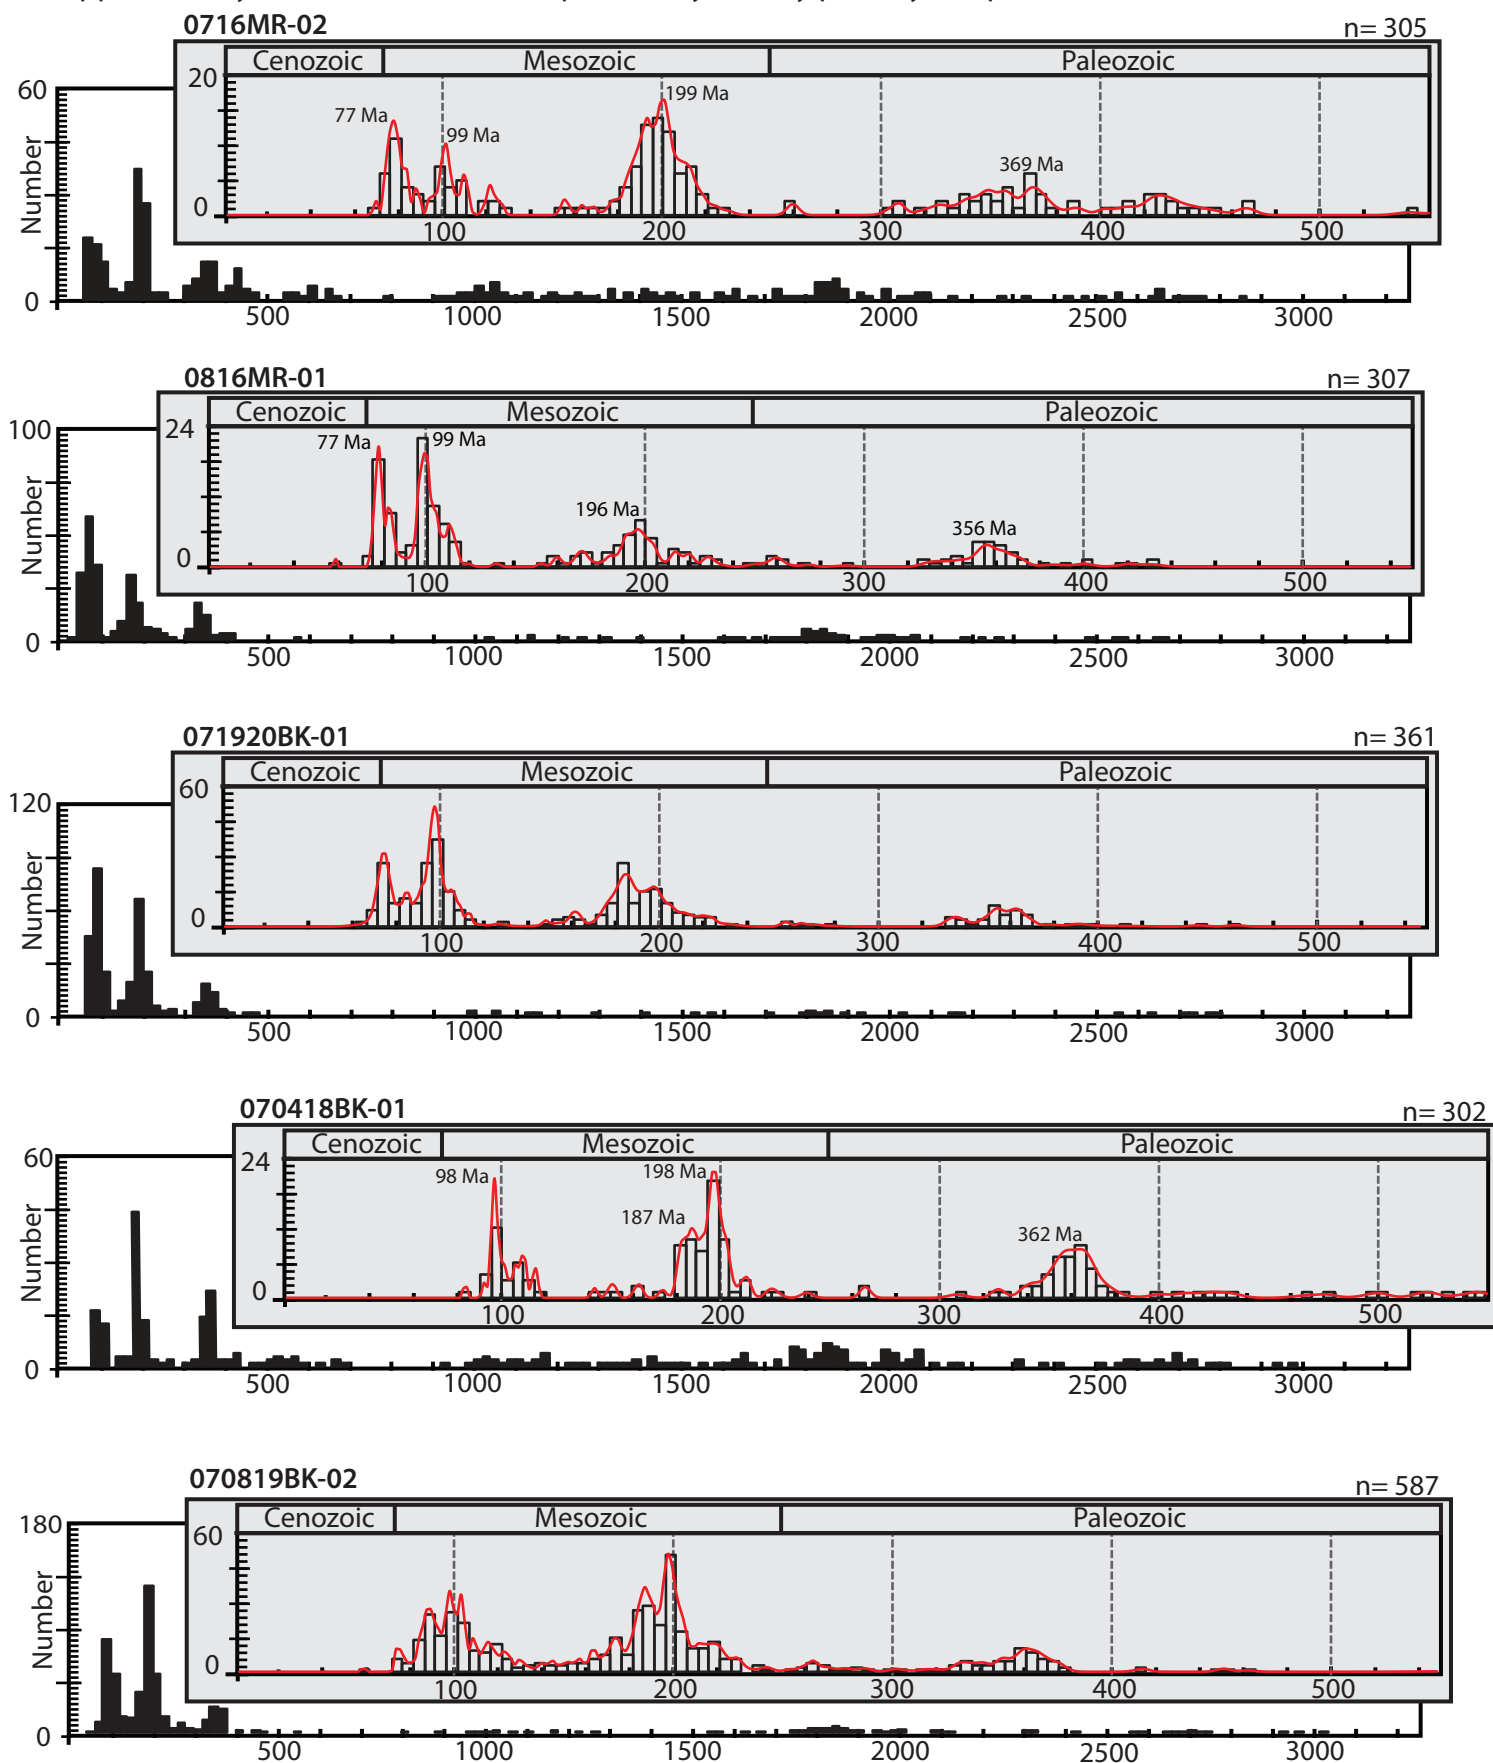

Supplementary File S2 - Detrital zircon probability density plots by sample

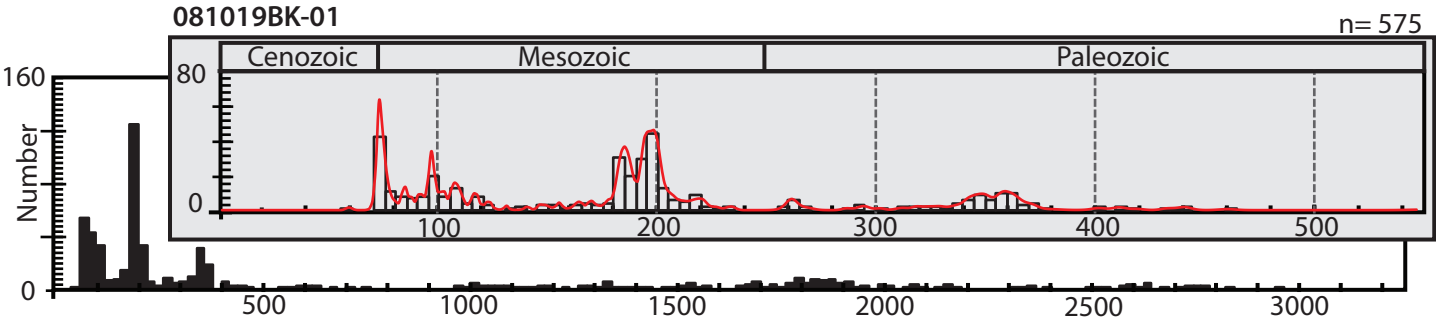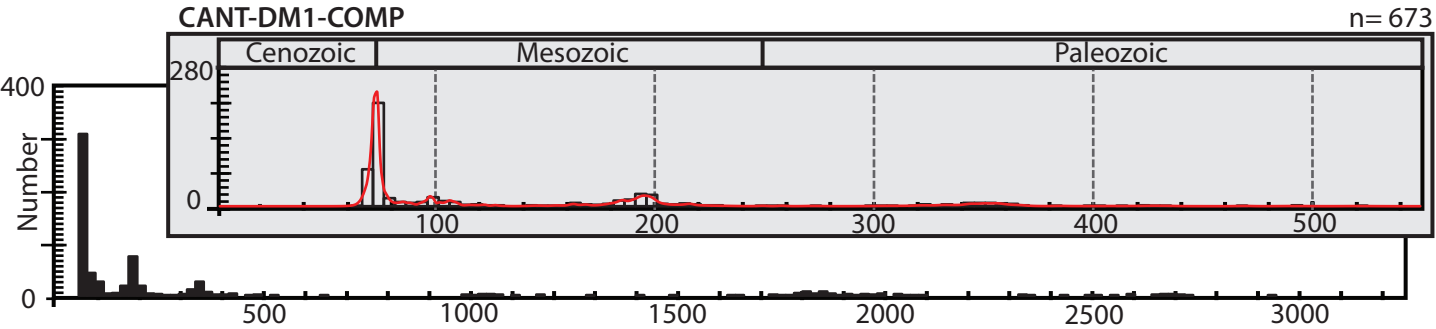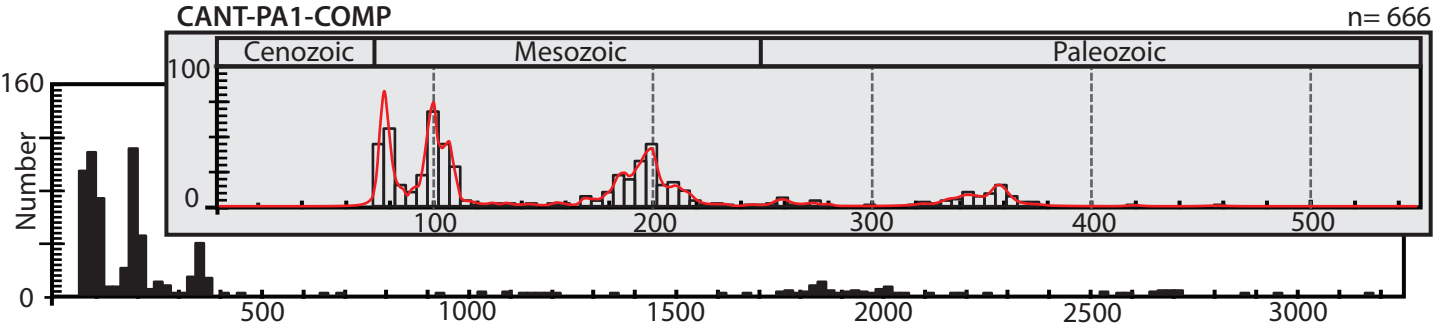

Supplement: s1 [file s1 › Supplemental File S2 - DZ PDPs.pdf]
