# Supplementary material
Source: MDPI journal article supplement (https://www.mdpi.com/2076-3263/13/6/181)
Supplement: s1 [file s1 › Supplemental File S3 - U-Pb_DZ_data.xlsx]

## Sheet: PC1L-3.5m
Internal Uncertainty Level	one sigma
External Uncertainty 206/238 (% two sigma)	1.13272
External Uncertainty 206/207 (% two sigma)	6.02138
							Isotope ratios						Apparent ages (Ma)
Analysis	U	206Pb	U/Th	206Pb*	±	207Pb*	±	206Pb*	±	error	206Pb*	±	207Pb*	±	206Pb*	±	Best age	±	Conc
	(ppm)	204Pb		207Pb*	(%)	235U	(%)	238U	(%)	corr.	238U	(Ma)	235U	(Ma)	207Pb*	(Ma)	(Ma)	(Ma)	(%)
PC1-3_5m 1	744.534	7004.13	2.35683	17.5723	2.16581	0.234649	2.67901	0.030725	0.864715	0.322774	195.084	1.66165	214.029	5.1699	428.917	56.5433	195.084	1.66165	45.483
PC1-3_5m 2	428.511	3770.76	2.1739	14.5259	6.52596	0.256225	7.21501	0.0282891	1.17382	0.162692	179.832	2.08173	231.62	14.9435	797.414	149.408	179.832	2.08173	22.5518
PC1-3_5m 3	301.127	9239.53	2.17141	16.2266	3.48261	0.780899	4.40809	0.093357	0.845614	0.191832	575.361	4.65453	585.996	19.6286	628.336	93.2512	575.361	4.65453	91.5689
PC1-3_5m 4	114.136	4048.15	1.30534	7.67743	1.5475	6.57192	1.77539	0.371593	0.758015	0.426957	2036.89	13.2385	2055.59	15.6475	2075.14	28.2771	2075.14	28.2771	98.1567
PC1-3_5m 5	418.409	2033.3	0.312989	17.7384	3.54886	0.386409	4.29742	0.0564507	0.924601	0.215152	354.004	3.18488	331.743	12.1623	179.405	97.8866	354.004	3.18488	197.321
PC1-3_5m 6	112.675	531.485	1.36589	14.7871	6.72223	0.277685	14.7399	0.0502842	2.1018	0.142593	316.266	6.48687	248.819	32.5388	NA	NA	316.266	6.48687
PC1-3_5m 7	219.15	7224.07	1.40988	8.91613	0.888401	5.0021	1.18561	0.325674	0.715207	0.603239	1817.38	11.3265	1819.68	10.0331	1823.08	17.1552	1823.08	17.1552	99.6872
PC1-3_5m 8	500.062	2630.84	2.21117	17.3119	4.53746	0.44486	4.8905	0.0578351	0.852298	0.174276	362.446	3.00388	373.673	15.2902	444.836	107.093	362.446	3.00388	81.4786
PC1-3_5m 9	423.728	18706.3	1.52884	9.06209	0.740113	5.15216	1.04234	0.318949	0.722776	0.693419	1784.59	11.2672	1844.75	8.86361	1914.06	13.4763	1914.06	13.4763	93.236
PC1-3_5m 12	352.008	577.567	3.15125	15.5124	5.79461	0.172218	10.3367	0.0310335	1.87216	0.181118	197.014	3.63261	161.342	15.4211	NA	NA	197.014	3.63261
PC1-3_5m 13	535.607	1468.77	4.40695	18.5228	2.65359	0.207403	5.22474	0.0317599	1.38996	0.266034	201.553	2.75816	191.371	9.11318	68.599	NA	201.553	2.75816	293.814
PC1-3_5m 14	413.626	19310.1	2.22507	6.15129	0.752474	11.2235	1.10753	0.466025	0.81108	0.732334	2466.1	16.6207	2541.87	10.326	2603.61	12.5655	2603.61	12.5655	94.7185
PC1-3_5m 15	471.4	2058.07	1.70528	16.6465	5.66588	0.214153	6.98118	0.0271885	1.14345	0.16379	172.928	1.95105	197.032	12.5035	497.361	151.876	172.928	1.95105	34.7691
PC1-3_5m 16	747.67	3449.94	2.54538	17.3888	5.28279	0.245135	8.27184	0.0309412	0.958135	0.115831	196.437	1.85374	222.617	16.5371	510.185	180.886	196.437	1.85374	38.503
PC1-3_5m 18	868.498	1737.66	1.73892	17.9732	2.85206	0.203767	3.43873	0.0293702	0.829116	0.241111	186.605	1.52499	188.309	5.91051	210.747	77.3692	186.605	1.52499	88.5446
PC1-3_5m 19	1035.93	1179.59	2.29082	17.7954	4.72458	0.108319	5.63038	0.0166995	1.04205	0.185076	106.763	1.10336	104.427	5.58743	52.475	NA	106.763	1.10336	203.455
PC1-3_5m 25	434.194	10742.9	2.62268	5.60275	0.746732	13.3448	1.11959	0.509678	0.821812	0.73403	2655.25	17.8856	2704.36	10.576	2741.96	12.5037	2741.96	12.5037	96.8377
PC1-3_5m 31	529.06	23785.3	2.52571	5.76608	0.6925	12.7188	1.00657	0.498241	0.729239	0.724482	2606.23	15.6332	2659.05	9.47578	2700.19	11.4574	2700.19	11.4574	96.5204
PC1-3_5m 32	204.3	1845.77	2.31487	15.9511	6.3949	0.431869	7.77471	0.0533949	1.65573	0.212964	335.331	5.41023	364.503	23.8146	555.516	165.921	335.331	5.41023	60.3638
PC1-3_5m 33	436.918	3647.89	2.52729	16.7797	7.0355	0.252306	9.33936	0.0312602	0.809322	0.0866572	198.431	1.58148	228.448	19.108	550.914	203.496	198.431	1.58148	36.0184
PC1-3_5m 34	247.176	2052.54	2.76675	15.8143	6.27996	0.505135	10.7512	0.0639291	1.10894	0.103145	399.476	4.29547	415.173	36.6528	504.349	235.92	399.476	4.29547	79.2063
PC1-3_5m 35	559.889	2227.74	2.48659	16.7672	3.92962	0.233313	7.90983	0.0312367	1.14834	0.14518	198.284	2.24232	212.93	15.1948	379.148	176.229	198.284	2.24232	52.2972
PC1-3_5m 36	658.605	852.5	1.52867	16.2702	5.03766	0.112076	10.7865	0.0180656	1.09142	0.101183	115.419	1.24849	107.863	11.0384	NA	NA	115.419	1.24849
PC1-3_5m 37	771.73	2137.33	1.87381	17.9125	2.12457	0.401448	2.64512	0.0582674	0.67183	0.253989	365.08	2.38456	342.698	7.69371	194.594	59.4674	365.08	2.38456	187.611
PC1-3_5m 40	1781.8	2320.11	2.8337	19.3063	1.99155	0.192648	2.52146	0.0304236	0.665845	0.264072	193.199	1.26732	178.886	4.13558	NA	NA	193.199	1.26732
PC1-3_5m 41	627.757	1489.53	1.91272	17.9391	3.01815	0.360877	3.72207	0.0564751	0.785883	0.211141	354.153	2.70816	312.869	10.0223	16.6155	NA	354.153	2.70816	2131.46
PC1-3_5m 43	213.417	428.986	2.8626	12.5023	10.5185	0.236392	11.9802	0.0372285	1.70424	0.142255	235.631	3.94322	215.461	23.2619	1.43009	NA	235.631	3.94322	16476.7
PC1-3_5m 47	259.551	289.845	7.03413	14.4238	8.86675	0.077906	23.5892	0.0341194	2.54931	0.108071	216.279	5.42215	76.1744	17.3132	NA	NA	216.279	5.42215
PC1-3_5m 48	473.168	729.929	3.40683	16.9622	6.42134	0.166318	8.6147	0.0312231	1.11965	0.12997	198.199	2.18537	156.218	12.4742	NA	NA	198.199	2.18537
PC1-3_5m 49	202.168	3745.84	4.72879	8.67897	1.03344	4.45091	3.21286	0.288754	0.75517	0.235046	1635.3	10.9074	1721.87	26.6441	1829.56	56.624	1829.56	56.624	89.382
PC1-3_5m 50	529.19	1758.94	2.13807	16.3101	6.76854	0.211207	8.02375	0.0288334	1.23775	0.154261	183.243	2.23616	194.565	14.2078	335.185	179.902	183.243	2.23616	54.6691
PC1-3_5m 52	709.09	646.121	1.70009	15.9868	5.17242	0.132577	6.2468	0.0242559	1.07616	0.172274	154.498	1.64288	126.411	7.425	NA	NA	154.498	1.64288
PC1-3_5m 53	468.242	529.93	2.43093	16.6068	3.43621	0.131741	6.80046	0.0299305	0.862549	0.126837	190.113	1.61587	125.661	8.03805	NA	NA	190.113	1.61587
PC1-3_5m 55	324.564	486.977	2.99033	14.1681	6.44241	0.169832	8.81014	0.0307042	1.0028	0.113824	194.954	1.92574	159.273	12.9877	NA	NA	194.954	1.92574
PC1-3_5m 56	388.327	5805.91	3.81567	11.2598	1.09877	2.85501	1.30154	0.23911	0.658735	0.506121	1382.07	8.19441	1370.13	9.78773	1352.39	21.656	1352.39	21.656	102.195
PC1-3_5m 57	571.027	1654.06	1.42829	17.114	4.22097	0.192945	5.34913	0.0281923	1.09045	0.203855	179.224	1.92743	179.139	8.7849	179.004	122.151	179.224	1.92743	100.123
PC1-3_5m 58	427.993	15718.3	2.25056	7.7751	0.728615	6.33466	1.07299	0.359465	0.781311	0.728159	1979.64	13.3178	2023.26	9.40986	2068.82	12.961	2068.82	12.961	95.6891
PC1-3_5m 59	703.795	2676.62	2.76645	17.6648	3.71218	0.217294	5.9286	0.0308161	0.806826	0.136091	195.654	1.55487	199.655	10.7461	248.185	135.285	195.654	1.55487	78.8338
PC1-3_5m 60	529.672	3700.62	1.81766	16.8751	5.05938	0.233466	7.79506	0.0306032	0.97589	0.125193	194.323	1.86808	213.056	14.9823	426.502	172.71	194.323	1.86808	45.5619
PC1-3_5m 61	463.758	2044.74	1.05839	13.7144	5.93743	0.260904	7.05243	0.0287188	1.2745	0.180718	182.524	2.29365	235.395	14.8183	803.747	145.424	182.524	2.29365	22.7092
PC1-3_5m 62	232.551	11928.8	2.08817	11.7165	1.7369	2.61478	1.97117	0.225713	0.754298	0.382666	1311.99	8.95424	1304.8	14.4789	1293.82	35.4073	1293.82	35.4073	101.404
PC1-3_5m 66	1824.77	4264.17	1.77893	18.8217	1.81881	0.0989244	2.63177	0.0144853	0.747518	0.284036	92.7085	0.688053	95.783	2.40555	174.019	58.8866	92.7085	0.688053	53.2749
PC1-3_5m 67	505.596	17647.3	2.58812	13.3999	1.06291	1.7862	1.31997	0.176009	0.683771	0.518019	1045.13	6.5971	1040.44	8.59256	1031.45	22.8388	1031.45	22.8388	101.326
PC1-3_5m 68	898.533	5269.41	1.2406	19.0552	2.71221	0.260973	3.50284	0.0381126	0.762381	0.217647	241.123	1.80432	235.451	7.36119	180.209	79.7248	241.123	1.80432	133.802
PC1-3_5m 69	194.177	12291.6	0.826776	8.91379	0.94965	4.98978	1.57588	0.325958	0.840812	0.533552	1818.76	13.3245	1817.59	13.3305	1817.03	24.1995	1817.03	24.1995	100.095
PC1-3_5m 70	1955.65	11812.4	3.29295	19.3504	1.66446	0.214271	2.75217	0.0308298	0.892322	0.324225	195.74	1.72038	197.131	4.93125	214.82	60.2833	195.74	1.72038	91.1178
PC1-3_5m 71	532.252	2625.04	1.58237	17.7525	3.24822	0.40487	4.18772	0.0578979	0.881772	0.210561	362.829	3.11096	345.174	12.2549	228.961	94.6011	362.829	3.11096	158.468
PC1-3_5m 72	320.125	757.585	1.7104	14.44	10.4181	0.172371	11.846	0.0250962	1.76987	0.149407	159.784	2.79321	161.475	17.6866	187.333	NA	159.784	2.79321	85.294
PC1-3_5m 73	445.46	16832.5	3.28847	14.0493	1.19923	1.56248	1.54758	0.160758	0.826513	0.534067	960.986	7.37901	955.452	9.58189	943.603	26.8027	943.603	26.8027	101.842
PC1-3_5m 74	833.833	12136.3	2.0384	18.059	2.72527	0.43663	3.14691	0.0584903	0.9133	0.290221	366.437	3.25333	367.873	9.71172	377.887	67.7514	366.437	3.25333	96.9701
PC1-3_5m 75	1622.62	12633	2.20229	19.2826	1.922	0.216712	2.15412	0.0310193	0.921879	0.42796	196.924	1.78796	199.17	3.89581	226.858	44.9955	196.924	1.78796	86.8052
PC1-3_5m 76	459.472	2503.58	5.67713	14.7905	8.3008	0.129438	9.61729	0.0151935	1.3988	0.145446	97.2071	1.34953	123.593	11.1918	667.695	204.125	97.2071	1.34953	14.5586
PC1-3_5m 77	634.413	710.167	2.21176	14.4659	6.91025	0.103709	8.33698	0.0155594	1.77306	0.212674	99.53	1.75117	100.194	7.95442	117.058	NA	99.53	1.75117	85.0263
PC1-3_5m 79	674.231	2298.8	0.749647	17.7082	3.60045	0.355895	3.80585	0.0513239	0.885569	0.232686	322.645	2.78692	309.145	10.1436	209.538	85.8442	322.645	2.78692	153.979
PC1-3_5m 80	784.364	1266.96	1.76196	18.2335	4.06525	0.170369	4.45547	0.0285232	0.920017	0.206491	181.299	1.64474	159.739	6.58563	NA	NA	181.299	1.64474
PC1-3_5m 81	712.184	1223.34	2.94395	17.4733	4.69236	0.192007	5.10338	0.0307212	0.997633	0.195485	195.06	1.91684	178.341	8.34712	NA	NA	195.06	1.91684
PC1-3_5m 82	1228.71	1111.58	2.01002	18.333	2.91204	0.161979	4.43317	0.0284134	0.837583	0.188935	180.611	1.49177	152.434	6.27496	NA	NA	180.611	1.49177
PC1-3_5m 83	118.905	688.109	1.69606	14.7079	4.87488	0.630476	6.66486	0.097409	1.02155	0.153274	599.207	5.84533	496.392	26.1741	47.3654	NA	599.207	5.84533	1265.07
PC1-3_5m 84	288.84	4269.74	2.24114	7.64268	0.879447	5.59351	1.24009	0.314008	0.838294	0.675993	1760.4	12.9139	1915.1	10.6824	2087.78	16.0711	2087.78	16.0711	84.3194
PC1-3_5m 85	484.665	1174.27	2.50604	16.9835	4.00791	0.226422	4.68505	0.0350595	0.997471	0.212905	222.136	2.17801	207.241	8.78281	42.0814	NA	222.136	2.17801	527.873
PC1-3_5m 86	670.653	1510.29	3.47894	17.3412	3.92021	0.238468	4.45608	0.0356902	1.32522	0.297396	226.063	2.94391	217.165	8.71243	122.774	100.258	226.063	2.94391	184.129
PC1-3_5m 87	668.087	1056.29	2.52476	17.598	4.08824	0.170141	4.72317	0.028517	0.940629	0.199152	181.26	1.68124	159.541	6.97334	NA	NA	181.26	1.68124
PC1-3_5m 88	877.249	1311.08	1.9848	18.2504	2.86643	0.178636	3.65216	0.029417	0.72925	0.199676	186.898	1.34339	166.886	5.62048	NA	NA	186.898	1.34339
PC1-3_5m 89	641.034	1071.62	1.91804	17.8195	5.2937	0.183094	5.51121	0.0309603	0.74791	0.135707	196.556	1.44787	170.72	8.66049	NA	NA	196.556	1.44787
PC1-3_5m 90	1149.38	2267.08	1.79162	17.735	2.43361	0.204864	2.74133	0.0293446	0.802022	0.292567	186.445	1.47391	189.234	4.73284	225.166	60.6069	186.445	1.47391	82.8032
PC1-3_5m 91	76.558	1539.35	0.957407	8.55287	2.65075	5.24129	2.79834	0.346478	0.746004	0.266588	1917.76	12.3748	1859.36	23.8657	1795.44	49.1064	1795.44	49.1064	106.813
PC1-3_5m 92	962.349	1564.97	3.50303	18.0829	2.99398	0.194558	3.17335	0.0303239	0.658244	0.207429	192.575	1.24887	180.511	5.248	26.3776	NA	192.575	1.24887	730.07
PC1-3_5m 93	520.597	1000.41	2.54524	17.8925	3.503	0.173541	4.88545	0.0302304	0.962619	0.197038	191.99	1.82088	162.487	7.33578	NA	NA	191.99	1.82088
PC1-3_5m 94	460.988	1114.06	2.40757	16.2403	5.19391	0.274454	5.60371	0.0404889	0.825953	0.147394	255.862	2.07191	246.249	12.2539	156.582	129.811	255.862	2.07191	163.405
PC1-3_5m 95	539.707	472.993	2.73668	13.7893	9.26079	0.0910993	10.6593	0.0158568	1.84295	0.172897	101.418	1.85446	88.5269	9.03689	NA	NA	101.418	1.85446
PC1-3_5m 96	263.961	597.529	1.26493	15.6032	6.51554	0.309316	7.39279	0.0564006	1.12093	0.151624	353.698	3.8579	273.651	17.7354	NA	NA	353.698	3.8579
PC1-3_5m 98	209.882	662.711	1.60959	16.1494	4.69123	0.296595	6.56473	0.0536912	1.08695	0.165574	337.143	3.5704	263.737	15.2489	NA	NA	337.143	3.5704
PC1-3_5m 99	352.349	2193.07	1.36701	16.5424	3.90678	0.683694	4.08174	0.0906747	0.781914	0.191564	559.526	4.19052	529.005	16.8312	400.355	89.774	559.526	4.19052	139.757
PC1-3_5m 100	910.798	3436	1.54846	17.91	2.03037	0.412349	2.29561	0.0570119	0.717102	0.312379	357.428	2.49336	350.565	6.80548	306.369	49.6733	357.428	2.49336	116.666
PC1-3_5m 101	1859	2412.61	1.58965	18.7387	2.76057	0.111974	2.99819	0.0168989	0.768755	0.256406	108.027	0.823544	107.769	3.06558	103.099	68.5243	108.027	0.823544	104.78
PC1-3_5m 102	381.651	11406.6	1.51112	8.1588	0.653366	6.10174	0.95851	0.35828	0.651548	0.67975	1974.02	11.0789	1990.5	8.36229	2008.41	12.4756	2008.41	12.4756	98.2875
PC1-3_5m 103	108.582	3163.41	1.14099	8.20228	1.78194	6.01473	1.95941	0.362433	0.743286	0.379341	1993.69	12.7464	1977.98	17.0609	1962.35	32.3513	1962.35	32.3513	101.597
PC1-3_5m 104	371.615	6049.08	2.71109	12.8954	1.23114	2.02401	1.44572	0.190874	0.694247	0.480208	1126.11	7.17322	1123.61	9.82556	1119.66	25.296	1119.66	25.296	100.576
PC1-3_5m 106	1282.81	6303.11	25.1262	18.3785	1.5605	0.427541	1.72413	0.0582088	0.610414	0.354041	364.723	2.16451	361.429	5.24317	341.328	36.5061	364.723	2.16451	106.854
PC1-3_5m 108	525.502	2815.65	2.44879	18.0998	2.76173	0.376254	4.38991	0.0531443	0.826269	0.18822	333.797	2.68787	324.278	12.1868	257.484	99.1207	333.797	2.68787	129.638
PC1-3_5m 109	505.493	2921.66	2.4747	17.6562	3.0425	0.494389	3.26468	0.0676792	0.776281	0.237782	422.158	3.17213	407.897	10.9671	328.954	71.9526	422.158	3.17213	128.334
PC1-3_5m 110	435.566	8515.28	2.18737	12.3733	1.0832	2.27219	1.31273	0.202858	0.603727	0.4599	1190.66	6.56352	1203.7	9.25604	1228.01	22.9054	1228.01	22.9054	96.9582
PC1-3_5m 111	590.509	1442.2	2.71743	17.4385	4.85767	0.191356	5.38559	0.0287036	1.04544	0.194118	182.429	1.88045	177.786	8.78365	117.503	NA	182.429	1.88045	155.255
PC1-3_5m 112	193.314	1124.76	1.29232	16.0695	6.31628	0.476003	7.3987	0.0680825	0.985413	0.133187	424.593	4.04918	395.327	24.2321	228.559	169.599	424.593	4.04918	185.769
PC1-3_5m 113	645.114	667.774	1.75845	15.2528	6.03086	0.183476	11.9105	0.0297215	1.25656	0.1055	188.805	2.33804	171.048	18.7513	NA	NA	188.805	2.33804
PC1-3_5m 114	865.802	4968.11	1.14584	17.4863	2.3918	0.515252	2.60451	0.0667255	0.782741	0.300533	416.398	3.15628	421.975	8.99296	453.512	55.1647	416.398	3.15628	91.8162
PC1-3_5m 115	1329.94	4407.26	4.04118	19.1987	1.53032	0.280408	1.80465	0.040411	0.648242	0.359207	255.38	1.62312	250.981	4.01298	211.058	39.0346	255.38	1.62312	121
PC1-3_5m 116	360.272	1673.12	2.1546	17.2423	4.61594	0.378661	5.01495	0.0540531	0.935357	0.186514	339.358	3.0921	326.053	13.9868	233.138	113.81	339.358	3.0921	145.561
PC1-3_5m 117	246.23	6842.78	1.51975	8.78639	0.760723	5.34963	1.05839	0.336047	0.725907	0.685862	1867.62	11.77	1876.83	9.05443	1887.81	13.864	1887.81	13.864	98.9308
PC1-3_5m 118	819.795	2008.6	2.57331	17.6168	4.45636	0.218786	4.6717	0.0311298	0.791306	0.169383	197.616	1.54002	200.899	8.51546	240.618	106.173	197.616	1.54002	82.1283
PC1-3_5m 119	574.774	1525.18	2.49918	18.549	3.14074	0.198288	4.14944	0.0315133	1.14899	0.276902	200.012	2.26283	183.677	6.97208	NA	NA	200.012	2.26283
PC1-3_5m 120	445.974	1313.04	3.06425	16.6058	5.69028	0.214456	6.39348	0.0307396	1.04331	0.163184	195.176	2.00578	197.285	11.4642	223.594	145.979	195.176	2.00578	87.29
PC1-3_5m 121	512.806	2341.64	2.30585	17.9693	3.50801	0.403267	3.94025	0.0573758	1.37079	0.347893	359.646	4.79499	344.015	11.4981	240.727	85.1844	359.646	4.79499	149.4
PC1-3_5m 122	765.741	1788.08	3.03505	18.0169	3.29051	0.203942	3.6331	0.0303199	0.711704	0.195895	192.55	1.35012	188.456	6.24905	138.496	83.707	192.55	1.35012	139.029
PC1-3_5m 123	309.731	4578.28	3.14398	13.9512	1.75111	1.64607	2.00571	0.168436	0.811843	0.404766	1003.49	7.54432	988.043	12.6697	954.772	37.509	954.772	37.509	105.102
PC1-3_5m 124	601.02	1795.65	1.74647	17.0622	4.79861	0.239918	5.12864	0.0333802	0.805701	0.157098	211.669	1.67772	218.353	10.0766	292.037	115.744	211.669	1.67772	72.4802
PC1-3_5m 125	232.74	5785.93	1.44354	8.03589	0.927971	6.32702	1.1379	0.363451	0.642733	0.56484	1998.51	11.0447	2022.21	9.97748	2047.23	16.59	2047.23	16.59	97.6199
PC1-3_5m 126	1541.82	2397.97	1.76182	19.7005	2.27186	0.116056	2.86966	0.0182644	0.837321	0.291784	116.678	0.968179	111.49	3.03001	3.12253	NA	116.678	0.968179	3736.64
PC1-3_5m 127	944.444	32992.8	7.41843	5.4176	0.649606	12.7077	1.02837	0.484011	0.797147	0.775159	2544.71	16.7601	2658.23	9.68039	2746.48	10.6826	2746.48	10.6826	92.6535
PC1-3_5m 128	822.118	2479.14	1.71276	18.9038	2.65656	-0.197169	3.56258	0.0371372	0.725161	0.203549	235.064	1.67389	NA	-8.88427	NA	NA	235.064	1.67389
PC1-3_5m 129	616.52	1574.01	2.57754	18.6717	2.83064	-0.115269	3.37376	0.0368888	1.00397	0.297582	233.52	2.30251	NA	-4.46322	NA	NA	233.52	2.30251
PC1-3_5m 130	385.837	1852.36	1.68692	16.6258	4.85761	-0.271721	5.17894	0.073483	0.829789	0.160224	457.105	3.66165	NA	-19.6224	NA	NA	457.105	3.66165
PC1-3_5m 131	442.634	1026.1	1.9346	16.9093	4.84528	-0.0979858	6.30522	0.0309607	1.0906	0.172968	196.558	2.11131	NA	-6.95484	NA	NA	196.558	2.11131
PC1-3_5m 132	462.93	1991.16	2.38705	17.7253	5.22853	-0.208213	5.63891	0.0599983	1.04094	0.184599	375.615	3.7982	NA	-15.0577	NA	NA	375.615	3.7982
PC1-3_5m 142	1521.23	1545.5	2.99749	19.1229	2.45892	-0.103622	5.27885	0.0344634	1.84265	0.349063	218.423	3.95735	NA	-6.19632	NA	NA	218.423	3.95735
PC1-3_5m 143	356.537	4072.87	1.84808	9.12737	0.845065	-2.92486	1.22973	0.390936	0.696299	0.566223	2127.17	12.6157	NA	NA	NA	NA	2127.17	12.6157
PC1-3_5m 144	387.445	6422.07	1.32965	8.3895	0.753616	-2.21467	1.44838	0.468537	1.20512	0.832047	2477.14	24.7863	NA	NA	NA	NA	2477.14	24.7863
PC1-3_5m 145	291.536	483.67	3.42612	16.6469	4.47796	-0.118604	19.34	0.0581964	1.65255	0.0854474	364.648	5.85872	NA	-26.4308	NA	NA	364.648	5.85872
PC1-3_5m 146	589.143	1064.14	1.19871	18.5416	2.71069	-0.185152	5.92001	0.065774	0.815305	0.13772	410.645	3.2436	NA	-13.6594	NA	NA	410.645	3.2436
PC1-3_5m 147	2853.51	1624.41	2.49873	18.8372	3.29444	-0.0607947	4.13502	0.0196385	0.713042	0.17244	125.371	0.885308	NA	-2.71778	NA	NA	125.371	0.885308
PC1-3_5m 148	656.224	746.218	1.88991	16.4828	4.57794	-0.111331	8.88825	0.0387918	1.01348	0.114025	245.34	2.43976	NA	-11.3068	NA	NA	245.34	2.43976
PC1-3_5m 149	872.041	896.225	2.04525	18.307	4.65374	0.15697	9.15858	0.0285588	0.706933	0.0771881	181.522	1.26534	148.048	12.6176	NA	NA	181.522	1.26534
PC1-3_5m 150	117.224	190.047	1.23639	9.89115	20.6241	0.121162	64.8035	0.0400272	2.23895	0.0345498	253.002	5.55486	116.125	71.2259	NA	NA	253.002	5.55486
PC1-3_5m 157	389.488	14126.3	2.22675	8.70514	0.707826	5.42846	1.1765	0.337561	0.688371	0.5851	1874.92	11.199	1889.36	10.088	1906.03	17.1371	1906.03	17.1371	98.3682
PC1-3_5m 158	1313.97	1733.86	3.67764	18.1265	3.33912	0.0983257	3.81083	0.0150044	0.935363	0.245449	96.0062	0.891352	95.2296	3.46407	76.834	NA	96.0062	0.891352	124.953
PC1-3_5m 159	245.523	474.301	1.89744	14.3658	11.2662	0.123117	15.4807	0.022974	2.81567	0.181883	146.424	4.07635	117.894	17.2328	NA	NA	146.424	4.07635
PC1-3_5m 160	295.045	1599.8	1.84067	17.8242	4.22003	0.343011	5.72656	0.052068	1.16975	0.204268	327.206	3.73198	299.451	14.8519	89.3861	NA	327.206	3.73198	366.059
PC1-3_5m 161	367.693	4422.31	2.83975	13.1718	1.55183	1.87994	1.68828	0.184065	0.621233	0.367969	1089.14	6.22542	1074.04	11.1906	1044.37	31.6876	1044.37	31.6876	104.287
PC1-3_5m 162	398.591	7672.81	2.63869	8.78902	0.761714	5.12036	1.021	0.327349	0.67044	0.656653	1825.52	10.6587	1839.49	8.67337	1856.1	13.9136	1856.1	13.9136	98.3528
PC1-3_5m 163	603.169	1190.01	1.29255	16.1163	8.88067	0.221003	9.146	0.0318954	0.880887	0.0963139	202.4	1.75522	202.744	16.8105	207.768	211.486	202.4	1.75522	97.4165
PC1-3_5m 164	617.978	3168.27	3.84354	17.6665	2.22223	0.512866	2.65419	0.0707555	0.650315	0.245014	440.706	2.77021	420.374	9.13645	311.282	58.5587	440.706	2.77021	141.578
PC1-3_5m 165	1953.58	6382.41	1.06835	18.54	1.53235	0.418827	1.68889	0.0581659	0.660057	0.390823	364.462	2.33892	355.212	5.06221	296.189	35.464	364.462	2.33892	123.05
PC1-3_5m 166	147.403	4574.42	3.25429	9.38731	1.65642	4.48663	1.92366	0.310777	0.867115	0.450764	1744.53	13.2531	1728.5	15.9738	1709.93	31.596	1709.93	31.596	102.023
PC1-3_5m 167	224.517	3876.43	2.66905	13.6003	3.00865	1.67414	3.16621	0.171918	0.846577	0.267378	1022.67	8.00588	998.76	20.1296	947.505	62.4555	947.505	62.4555	107.933
PC1-3_5m 168	1407.8	2662.33	2.25467	18.2038	3.25716	0.125327	3.6199	0.0181889	0.881633	0.243552	116.199	1.01527	119.89	4.09349	194.782	81.6319	116.199	1.01527	59.6562
PC1-3_5m 169	1276.07	142235	2.97197	9.27691	0.76522	3.75485	1.23749	0.250371	0.972331	0.785726	1440.39	12.551	1583.15	9.92298	1779.69	13.9612	1779.69	13.9612	80.9348
PC1-3_5m 170	222.865	7476.01	3.47993	8.87162	1.03726	5.13339	1.36845	0.332376	0.859875	0.628356	1849.89	13.8279	1841.65	11.6301	1833.12	19.29	1833.12	19.29	100.915
PC1-3_5m 171	867.265	1911.79	5.51794	16.0468	2.22916	0.473931	9.23351	0.0622343	0.877795	0.0950662	389.199	3.31528	393.901	30.1552	422.542	205.545	389.199	3.31528	92.1089
PC1-3_5m 172	464.58	3145.96	3.74345	15.6149	6.97433	0.276053	7.86463	0.0333595	1.21088	0.153965	211.54	2.51992	247.522	17.2772	605.098	168.332	211.54	2.51992	34.9596
PC1-3_5m 174	325.747	605.658	2.46722	13.2996	7.92616	0.212915	10.1002	0.0300739	1.02874	0.101853	191.011	1.93618	195.996	18.0046	257.455	231.411	191.011	1.93618	74.192
PC1-3_5m 175	320.017	3414.06	3.01723	17.4049	4.12283	0.407353	4.5333	0.0551365	1.09547	0.24165	345.98	3.6902	346.967	13.3241	354.543	99.3875	345.98	3.6902	97.5847
PC1-3_5m 176	583.274	3309.82	1.99182	17.2443	5.24251	0.268516	7.90403	0.0360743	0.831038	0.105141	228.453	1.86529	241.507	16.99	371.375	177.263	228.453	1.86529	61.5155
PC1-3_5m 177	1173.49	7980.58	3.1529	19.5013	2.00088	0.216511	3.06988	0.0315206	0.790929	0.257641	200.058	1.55802	199.001	5.54778	187.484	69.0585	200.058	1.55802	106.707
PC1-3_5m 178	869.207	2391.44	2.23663	18.1345	2.26199	0.209536	2.80682	0.0307476	0.856648	0.305202	195.225	1.64732	193.163	4.93728	169.03	62.4121	195.225	1.64732	115.497
PC1-3_5m 179	1215.86	3319.78	2.94881	18.7441	2.64668	0.214629	2.8673	0.0315457	0.773769	0.269859	200.215	1.52539	197.43	5.1446	165.273	64.5311	200.215	1.52539	121.142
PC1-3_5m 180	718.313	2073.39	2.19974	16.8531	5.1607	0.241622	5.3617	0.0332357	0.862327	0.160831	210.768	1.78812	219.747	10.5948	318.014	120.359	210.768	1.78812	66.2763
PC1-3_5m 181	678.036	2224.09	1.24054	17.7855	2.66041	0.249506	3.17621	0.036155	0.717812	0.225996	228.956	1.61463	226.175	6.44003	198.342	71.8653	228.956	1.61463	115.435
PC1-3_5m 182	580.001	2131.34	2.10976	17.3116	4.39516	0.177576	7.92639	0.0250958	1.04624	0.131994	159.782	1.65115	165.972	12.1373	256.176	180.85	159.782	1.65115	62.3718
PC1-3_5m 183	1823.66	26904.4	1.92263	17.5239	0.780251	0.618736	1.03805	0.078682	0.655035	0.631022	488.251	3.0801	489.055	4.02885	493.785	17.7643	488.251	3.0801	98.8793
PC1-3_5m 184	336.188	1745.4	1.98024	11.7733	6.32837	0.263684	7.80783	0.0246733	1.64595	0.210808	157.124	2.55493	237.631	16.5441	1135.17	152.091	157.124	2.55493	13.8414
PC1-3_5m 185	2194.44	17591.5	2.40055	19.2555	1.89023	0.212982	2.15265	0.0299521	0.672797	0.312544	190.249	1.26128	196.052	3.83789	267.452	46.9072	190.249	1.26128	71.1337
PC1-3_5m 186	1360.14	8614.09	1.99603	19.4476	2.72586	0.21263	3.35383	0.0307359	0.724236	0.215943	195.152	1.39218	195.757	5.97134	204.042	76.008	195.152	1.39218	95.6432
PC1-3_5m 187	479.54	2678.48	2.42777	17.4024	4.88024	0.233843	5.88556	0.032322	1.15872	0.196875	205.065	2.33873	213.367	11.3266	307.005	131.532	205.065	2.33873	66.7951
PC1-3_5m 188	1656.56	7523.97	1.72228	19.3547	1.51544	0.207218	1.82951	0.0299302	0.669646	0.366024	190.111	1.25449	191.216	3.18867	205.884	39.4995	190.111	1.25449	92.3389
PC1-3_5m 189	52.9711	349.322	2.88238	8.02368	12.6504	0.515523	18.7993	0.0437973	4.40739	0.234445	276.328	11.9215	422.156	65.0203	1324.76	356.872	276.328	11.9215	20.8588
PC1-3_5m 190	179.1	13466.9	1.27503	5.28522	0.639141	13.8131	0.942363	0.525914	0.662781	0.703318	2724.21	14.7256	2736.98	8.92287	2747.11	11.0144	2747.11	11.0144	99.1666
PC1-3_5m 191	246.472	1558.25	2.10168	15.0154	7.67381	0.27057	9.91017	0.0338837	1.73418	0.17499	214.809	3.6638	243.15	21.4317	527.508	214.294	214.809	3.6638	40.7215
PC1-3_5m 192	515.264	51892.8	2.23072	5.69631	0.593051	12.5079	0.901828	0.511537	0.677315	0.751047	2663.19	14.7764	2643.32	8.4793	2628.85	9.89889	2628.85	9.89889	101.306
PC1-3_5m 193	2373.21	12871.8	2.26274	19.8217	1.95646	0.122043	2.21645	0.0177473	0.763678	0.34455	113.403	0.858462	116.922	2.44789	190.179	48.398	113.403	0.858462	59.6298
PC1-3_5m 194	701.672	5786.58	2.05483	18.5934	2.94921	0.222147	4.42333	0.0310934	0.822192	0.185876	197.388	1.59831	203.695	8.16404	278.355	99.5495	197.388	1.59831	70.9123
PC1-3_5m 195	346.094	1767.92	3.30512	14.5029	6.94351	0.203867	8.80249	0.0240522	2.48616	0.282438	153.215	3.76426	188.393	15.1369	656.767	181.397	153.215	3.76426	23.3287
PC1-3_5m 196	593.076	5561.48	2.49266	16.8705	4.74787	0.236432	5.09409	0.0299094	0.745967	0.146438	189.981	1.39652	215.495	9.89115	505.29	110.93	189.981	1.39652	37.5985
PC1-3_5m 197	204.355	9823.42	1.84752	12.4643	2.67258	2.16968	3.12416	0.197358	0.688056	0.220237	1161.11	7.31092	1171.38	21.7175	1191.24	60.1627	1191.24	60.1627	97.4707
PC1-3_5m 198	597.48	8461.5	1.0902	17.5079	4.09657	0.330644	4.60576	0.0427799	0.736999	0.160017	270.041	1.94909	290.058	11.6212	455.552	100.938	270.041	1.94909	59.2779
PC1-3_5m 199	240.48	16006.8	1.59144	8.73318	0.955698	5.23286	1.28739	0.329596	0.797873	0.61976	1836.42	12.7501	1857.98	10.9751	1882.97	18.1974	1882.97	18.1974	97.5279
PC1-3_5m 200	737.97	6068.63	4.39559	18.1068	2.58856	-0.0999329	4.54666	0.0424171	0.941673	0.207113	267.798	2.47012	NA	-5.12577	NA	NA	267.798	2.47012
PC1-3_5m 201	294.562	1666.63	2.48933	13.4836	8.78459	-0.12551	12.0911	0.0429422	1.36673	0.113036	271.044	3.62766	NA	-17.6224	NA	NA	271.044	3.62766
PC1-3_5m 202	839.146	4345.16	2.85395	18.171	3.13344	-0.0689469	3.49573	0.0496536	0.821186	0.234911	312.395	2.50417	NA	-2.6285	NA	NA	312.395	2.50417
PC1-3_5m 203	675.266	6716.78	1.55536	17.5339	2.68471	-0.185067	3.65372	0.0757784	0.792923	0.217018	470.875	3.60058	NA	-8.42524	NA	NA	470.875	3.60058
PC1-3_5m 204	243.441	9321.36	2.99338	11.057	1.23938	-1.30665	1.61593	0.329975	0.980287	0.606641	1838.26	15.6787	NA	NA	NA	NA	1838.26	15.6787
PC1-3_5m 205	683.746	10272.5	3.0319	17.859	2.47079	-0.193175	2.76107	0.0795147	0.893828	0.323725	493.225	4.24415	NA	-6.71253	NA	NA	493.225	4.24415
PC1-3_5m 214	936.271	1890.7	5.38095	18.4595	2.59393	-0.0902861	2.94701	0.0439766	0.706822	0.239844	277.435	1.91937	NA	-2.96981	NA	NA	277.435	1.91937
PC1-3_5m 215	1147.39	1854.84	1.91621	18.2852	2.62665	-0.0878384	2.99673	0.0424471	0.710365	0.237047	267.984	1.86464	NA	-2.93016	NA	NA	267.984	1.86464
PC1-3_5m 216	676.313	953.35	2.83887	16.5454	6.52527	-0.078182	6.87816	0.0392978	0.759335	0.110398	248.479	1.85089	NA	-5.92337	NA	NA	248.479	1.85089
PC1-3_5m 217	297.447	6113.29	1.99482	8.67935	0.7932	-2.31692	1.02035	0.462865	0.635019	0.622356	2452.2	12.9526	NA	NA	NA	NA	2452.2	12.9526
PC1-3_5m 218	658.977	2245.56	1.61682	17.5911	2.52929	-0.213158	2.72191	0.0755401	0.696184	0.25577	469.447	3.15205	NA	-7.48731	NA	NA	469.447	3.15205
PC1-3_5m 219	967.597	1872.49	2.38964	18.3445	2.67259	0.446024	3.01042	0.0326599	0.662042	0.219917	207.174	1.34977	374.491	9.42872	1607.05	54.7595	207.174	1.34977	12.8916
PC1-3_5m 221	213.067	224.066	3.22902	10.0822	14.7124	0.17613	23.7571	0.0187586	3.68415	0.155076	119.805	4.37305	164.725	36.1397	872.426	492.59	119.805	4.37305	13.7324
PC1-3_5m 222	1489.3	2791.91	1.84305	19.3594	2.6709	0.452476	2.80504	0.0333211	0.707973	0.252393	211.301	1.4717	379.012	8.87293	1596.45	50.6787	211.301	1.4717	13.2357
PC1-3_5m 223	1910.45	1613.16	3.18472	18.1788	2.04374	0.930607	2.69654	0.0289854	1.33127	0.493695	184.195	2.41743	667.954	13.1988	3072.46	37.4699	184.195	2.41743	5.99505
PC1-3_5m 224	243.055	223.047	3.11313	10.3779	22.2465	0.141419	28.2657	0.0168666	2.75739	0.0975528	107.822	2.94836	134.307	35.5738	633.499	617.038	107.822	2.94836	17.0201
PC1-3_5m 226	412.046	699.186	2.79428	17.0557	4.25563	0.348422	5.90774	0.031914	1.08726	0.18404	202.516	2.16766	303.534	15.5012	1177.55	114.922	202.516	2.16766	17.1981
PC1-3_5m 227	232.296	205.176	3.23575	11.5585	11.9937	0.058568	41.1508	0.0176505	1.66626	0.0404914	112.79	1.86302	57.7926	23.122	NA	NA	112.79	1.86302
PC1-3_5m 229	346.312	646.094	2.61169	14.8746	9.32151	0.954178	9.74628	0.0353026	1.22262	0.125445	223.65	2.6875	680.276	48.3573	2794.12	158.684	223.65	2.6875	8.00433
PC1-3_5m 230	575.384	1029.44	2.18281	17.4919	5.97714	0.870264	6.47955	0.0333734	0.866602	0.133744	211.627	1.80419	635.71	30.6235	2735.27	105.795	211.627	1.80419	7.73695
PC1-3_5m 271	1314.74	2466.63	1.74204	18.8659	1.42105	0.412567	1.72102	0.0573674	0.632024	0.367238	359.595	2.2105	350.722	5.10394	293.398	36.5414	359.595	2.2105	122.562
PC1-3_5m 273	357.463	557.954	1.39981	14.6092	7.10246	0.30203	8.00814	0.0474283	1.12631	0.140645	298.714	3.28767	267.985	18.8643	8.36801	NA	298.714	3.28767	3569.71
PC1-3_5m 274	213.531	353.479	1.51048	13.4459	11.2264	0.234156	14.4826	0.0489204	1.1826	0.0816567	307.89	3.55553	213.624	27.9076	NA	NA	307.89	3.55553
PC1-3_5m 275	395.699	207.591	0.996162	11.2951	15.4301	0.0327945	37.3259	0.0150941	2.25856	0.0605092	96.576	2.16497	32.7647	12.0351	NA	NA	96.576	2.16497
PC1-3_5m 276	623.849	570.251	1.55119	15.979	3.86832	0.152902	5.60327	0.0280304	1.08134	0.192984	178.209	1.90066	144.471	7.5457	NA	NA	178.209	1.90066
PC1-3_5m 277	392.703	359.411	2.38472	15.9828	5.58131	0.0868996	14.3584	0.0287625	1.12038	0.0780295	182.799	2.01927	84.6111	11.6569	NA	NA	182.799	2.01927
PC1-3_5m 278	300.885	4585.96	2.47126	5.41712	0.652726	12.1638	1.91228	0.445723	1.79267	0.937452	2376.21	35.6288	2617.12	17.9438	2809.87	10.8824	2809.87	10.8824	84.5666
PC1-3_5m 279	206.828	504.663	0.866342	15.2163	5.06993	0.265363	9.55303	0.0498672	1.15194	0.120584	313.706	3.52721	238.979	20.3448	NA	NA	313.706	3.52721
PC1-3_5m 280	357.677	511.612	1.71874	16.6963	4.74434	0.134744	15.8526	0.0300313	1.09272	0.0689296	190.744	2.05376	128.352	19.1159	NA	NA	190.744	2.05376
PC1-3_5m 281	495.038	11343.7	2.53406	5.69412	0.565786	12.4592	0.906356	0.484653	0.702659	0.775257	2547.5	14.7866	2639.65	8.51942	2711.78	9.4435	2711.78	9.4435	93.942
PC1-3_5m 282	473.182	657.966	1.99843	17.0238	3.11338	0.163496	14.7484	0.030823	1.34584	0.0912533	195.697	2.59419	153.759	21.0465	NA	NA	195.697	2.59419
PC1-3_5m 283	278.15	415.736	1.97724	14.6451	5.9561	0.145027	16.9923	0.0299017	1.69757	0.0999025	189.933	3.17721	137.511	21.8565	NA	NA	189.933	3.17721
PC1-3_5m 284	388.442	584.403	1.70431	13.9553	11.3126	0.205938	13.1427	0.0301369	1.07486	0.0817841	191.405	2.02709	190.138	22.7928	175.433	NA	191.405	2.02709	109.104
PC1-3_5m 286	396.867	1855.78	1.87055	16.2039	3.21926	0.773635	3.65085	0.0975336	0.691963	0.189535	599.939	3.96404	581.846	16.1709	512.801	78.7882	599.939	3.96404	116.993
PC1-3_5m 300	508.257	506.36	1.64591	15.4085	6.58018	0.1722	14.3343	0.0291865	1.07494	0.0749911	185.455	1.96513	161.327	21.3846	NA	NA	185.455	1.96513
PC1-3_5m 301	453.771	929.087	1.91109	13.0998	11.7221	0.148024	25.7185	0.014603	2.60166	0.101159	93.4565	2.41388	140.166	33.6835	1029.1	525.676	93.4565	2.41388	9.08136
PC1-3_5m 319	2091.04	4168.64	3.46266	17.9009	1.0893	0.489524	1.49919	0.0574888	0.810986	0.540948	360.336	2.8421	404.586	5.00285	666.631	26.9995	360.336	2.8421	54.0533
PC1-3_5m 327	516.499	677.708	1.82689	18.6127	3.17507	0.150485	6.87709	0.0309405	0.99154	0.14418	196.432	1.91832	142.34	9.13393	NA	NA	196.432	1.91832
PC1-3_5m 328	2060.02	11662.3	1.561	16.6226	1.03689	0.781309	1.57959	0.087407	0.976755	0.618361	540.184	5.06125	586.23	7.035	769.717	26.1387	540.184	5.06125	70.1795
PC1-3_5m 329	390.9	832.71	1.26068	16.7423	3.9026	0.332657	4.57194	0.0531229	1.00287	0.219353	333.666	3.26111	291.592	11.5885	NA	NA	333.666	3.26111
PC1-3_5m 330	268.31	276.397	2.01658	14.4234	10.1405	0.0601849	18.5303	0.0293241	1.44056	0.0777407	186.316	2.64559	59.3424	10.6816	NA	NA	186.316	2.64559
PC1-3_5m 331	840.539	968.434	2.6539	17.1137	4.83952	0.197495	5.43019	0.0306607	0.83419	0.153621	194.682	1.59974	183.005	9.09369	35.7986	NA	194.682	1.59974	543.825
PC1-3_5m 332	1154.96	1039.82	1.67047	18.6323	4.24885	0.150913	4.83658	0.0256822	0.940969	0.194552	163.468	1.51885	142.718	6.43959	NA	NA	163.468	1.51885
PC1-3_5m 333	264.66	281.145	2.56553	13.3025	9.75023	0.090852	17.9283	0.0293007	1.24303	0.0693334	186.17	2.28106	88.2968	15.1625	NA	NA	186.17	2.28106
PC1-3_5m 334	1979.2	4100.65	2.18425	18.8803	1.30797	0.293744	1.66814	0.0410778	0.772453	0.463063	259.51	1.96478	261.502	3.84578	280.404	33.8467	259.51	1.96478	92.5486
PC1-3_5m 335	749.499	1968.09	1.90659	17.9515	2.68715	0.403562	3.4226	0.0577784	0.834877	0.243931	362.101	2.93976	344.229	9.99261	226.26	76.7264	362.101	2.93976	160.037
PC1-3_5m 336	781.084	747.422	2.4774	17.7753	6.26266	0.0774499	9.72079	0.0147623	1.30729	0.134484	94.4685	1.22598	75.7445	7.09516	NA	NA	94.4685	1.22598
PC1-3_5m 337	54.3812	2043.48	0.860455	9.01662	2.67424	4.95604	4.96411	0.328318	0.999488	0.201343	1830.22	15.9254	1811.86	41.9658	1791.57	88.6108	1791.57	88.6108	102.158
PC1-3_5m 338	508.147	1223.26	2.7428	17.013	4.23904	0.204295	6.50118	0.0303297	1.50224	0.231071	192.612	2.85069	188.754	11.1986	141.794	NA	192.612	2.85069	135.839
PC1-3_5m 339	86.7664	1695.83	1.32857	8.59529	1.62891	5.22222	1.93636	0.336359	0.816791	0.421818	1869.13	13.2529	1856.25	16.503	1842.62	31.7773	1842.62	31.7773	101.438
PC1-3_5m 340	313.153	603.391	4.06335	14.3179	8.81685	0.200728	19.2254	0.0308943	1.1764	0.0611897	196.143	2.27267	185.742	32.6451	56.4851	NA	196.143	2.27267	347.247
PC1-3_5m 341	1553.01	10284.5	1.61932	18.3715	1.98704	0.435703	2.18535	0.0573621	0.646522	0.295843	359.563	2.26101	367.218	6.73416	416.782	46.6622	359.563	2.26101	86.2713
PC1-3_5m 342	775.989	3340.13	2.02293	18.4357	1.88402	0.392389	2.82525	0.0549375	0.870933	0.308268	344.764	2.92379	336.113	8.08449	277.699	61.561	344.764	2.92379	124.15
PC1-3_5m 343	802.558	14648.1	2.08927	9.03047	0.681272	5.0508	1.00446	0.321002	0.714706	0.711534	1794.62	11.1957	1827.88	8.51372	1866.75	12.7381	1866.75	12.7381	96.136
PC1-3_5m 344	779.056	75150.2	2.47699	6.27336	0.63978	10.4164	0.943019	0.458787	0.69245	0.73429	2434.2	14.0387	2472.51	8.73674	2504.88	10.7691	2504.88	10.7691	97.1786
PC1-3_5m 345	471.451	40106.7	23.452	6.65948	0.663781	9.18944	0.969529	0.434173	0.699266	0.721243	2324.5	13.6465	2357.06	8.87852	2386.07	11.435	2386.07	11.435	97.4196
PC1-3_5m 346	667.261	28385.1	3.17679	8.64824	0.686072	5.52566	1.00142	0.339709	0.726862	0.72583	1885.27	11.8814	1904.6	8.61027	1926.48	12.3421	1926.48	12.3421	97.8607
PC1-3_5m 347	315.265	2192.95	2.54185	17.1725	4.54995	0.300899	9.8865	0.041326	1.36933	0.138505	261.047	3.50319	267.102	23.2234	321.55	222.927	261.047	3.50319	81.184
PC1-3_5m 348	581.748	2198.87	2.02973	17.3601	3.39868	0.239274	4.82419	0.0332621	0.945903	0.196075	210.932	1.96293	217.826	9.45791	294	108.056	210.932	1.96293	71.7456
PC1-3_5m 349	164.837	464.208	1.50996	11.8911	13.4023	0.194139	40.0443	0.0263076	3.13955	0.0784018	167.397	5.18787	180.155	66.1978	351.987	NA	167.397	5.18787	47.5578
PC1-3_5m 350	280.785	1948.25	2.7764	14.4666	8.40511	0.417978	10.3944	0.047753	1.07137	0.103072	300.711	3.14775	354.605	31.1206	725.33	219.784	300.711	3.14775	41.4586
PC1-3_5m 351	203.783	1582.13	3.08523	12.7978	12.7028	0.324756	13.6297	0.0331414	2.16602	0.158919	210.179	4.47912	285.554	33.939	960.33	276.111	210.179	4.47912	21.8862
PC1-3_5m 352	281.166	26213.3	1.76854	8.36278	0.791923	5.91647	1.08543	0.353705	0.711376	0.655388	1952.27	11.9821	1963.66	9.42803	1976.44	14.603	1976.44	14.603	98.7769
PC1-3_5m 353	201.545	6592.39	2.04879	13.9595	2.87685	1.73592	4.20458	0.166919	0.715723	0.170225	995.113	6.59976	1021.95	27.0945	1080.74	83.1564	1080.74	83.1564	92.0771
PC1-3_5m 354	816.341	3409.42	2.27671	19.6855	2.88641	0.217858	6.86234	0.0313157	0.899255	0.131042	198.778	1.76024	200.126	12.4653	217.026	157.642	198.778	1.76024	91.5918
PC1-3_5m 355	1186.24	14036.4	2.43296	18.9567	1.46213	0.452645	1.81545	0.0584725	0.667751	0.367815	366.329	2.37796	379.13	5.74405	459.063	37.462	366.329	2.37796	79.7993
PC1-3_5m 356	265.109	687.031	3.372	10.0966	32.1324	0.182964	33.7213	0.0155891	3.40835	0.101074	99.7183	3.37259	170.608	53.0057	1319.16	669.428	99.7183	3.37259	7.55922
PC1-3_5m 357	936.927	12418.5	1.69253	18.6759	1.89062	0.452366	2.04558	0.0554031	0.678383	0.331633	347.608	2.29567	378.935	6.46944	576.051	41.9537	347.608	2.29567	60.3433
PC1-3_5m 367	562.879	763.327	2.29076	17.1322	5.0151	0.184154	6.37234	0.031353	0.783498	0.122953	199.011	1.53542	171.629	10.0628	NA	NA	199.011	1.53542
PC1-3_5m 368	181.502	4110.9	0.884156	5.49755	0.706903	13.4439	0.974167	0.496916	0.66335	0.680941	2600.53	14.1954	2711.35	9.20696	2795.7	11.6779	2795.7	11.6779	93.0189
PC1-3_5m 369	649.481	10720.7	1.71123	8.53213	0.580801	6.39723	0.896442	0.351255	0.663106	0.739709	1940.59	11.1119	2031.89	7.87197	2126.67	10.5639	2126.67	10.5639	91.25
PC1-3_5m 370	1062.48	2004.29	3.6071	18.818	2.29532	0.223834	3.03189	0.0311362	0.762798	0.251591	197.655	1.48483	205.096	5.63055	292.491	67.0169	197.655	1.48483	67.5765
PC1-3_5m 371	62.3853	571.365	1.16298	12.5874	8.05779	0.857478	12.1592	0.101245	1.22665	0.100883	621.703	7.26995	628.745	57.0546	655.071	260.395	621.703	7.26995	94.9061
PC1-3_5m 372	1970.42	6034.53	5.00898	19.6819	1.55331	0.243766	1.79672	0.0320871	0.629142	0.350162	203.597	1.2609	221.5	3.57557	417.184	37.5976	203.597	1.2609	48.8028
PC1-3_5m 373	79.9926	1687.6	3.12487	12.4628	6.14416	2.21563	7.8185	0.199292	0.811101	0.103741	1171.51	8.68877	1185.99	54.7526	1213.32	153.211	1213.32	153.211	96.5545
PC1-3_5m 374	760.893	6825.58	2.48471	18.7192	1.9105	0.431371	3.01853	0.0570888	0.789478	0.261544	357.897	2.74851	364.15	9.23711	405.12	65.2316	357.897	2.74851	88.3433
PC1-3_5m 375	811.387	8146.41	1.523	18.4429	2.33558	0.452804	2.54418	0.0586095	0.711219	0.279547	367.163	2.53836	379.241	8.05176	454.633	54.2422	367.163	2.53836	80.7604
PC1-3_5m 376	823.997	3259.28	1.89721	18.5668	2.28043	0.341732	2.61071	0.0469883	0.849414	0.325357	296.005	2.45745	298.484	6.75174	318.884	56.1085	296.005	2.45745	92.8252
PC1-3_5m 377	699.355	10561.1	2.34229	13.9516	0.834902	1.66138	1.19452	0.160313	0.738688	0.618398	958.513	6.57919	993.904	7.5717	1073.74	18.8341	1073.74	18.8341	89.2685
PC1-3_5m 378	264.925	4580.67	4.34738	11.1456	1.42242	3.09503	1.69908	0.242325	0.737299	0.43394	1398.77	9.27096	1431.46	13.0399	1481.2	29.0179	1481.2	29.0179	94.4348
PC1-3_5m 379	1045.02	3551.49	3.22252	19.2144	3.25389	0.209793	3.67051	0.0303589	0.879141	0.239515	192.794	1.66984	193.379	6.46313	201.517	82.7591	192.794	1.66984	95.6712
PC1-3_5m 380	192.01	849.094	2.17729	11.547	11.8822	0.346135	17.4268	0.0344064	2.09918	0.120457	218.067	4.50107	301.81	45.5299	1013.8	353.127	218.067	4.50107	21.5099
PC1-3_5m 381	294.029	1431.74	1.62134	13.3446	10.1331	0.2629	14.576	0.0280925	1.45494	0.099817	178.599	2.56283	237.002	30.8194	865.616	302.237	178.599	2.56283	20.6326
PC1-3_5m 382	588.078	2749.83	2.6966	16.7574	3.9551	0.224832	6.61772	0.0286662	1.04041	0.157215	182.195	1.86903	205.923	12.3351	487.958	144.363	182.195	1.86903	37.3383
PC1-3_5m 383	156.006	10374.7	1.68413	8.92695	1.30224	5.21714	1.57846	0.322712	0.715596	0.453351	1802.96	11.2547	1855.42	13.4503	1915.51	25.2419	1915.51	25.2419	94.1244
PC1-3_5m 385	145.397	3788.28	1.74886	4.7042	0.658122	17.5723	1.0075	0.567412	0.757188	0.751554	2897.18	17.6701	2966.61	9.67942	3014.72	10.672	3014.72	10.672	96.1013
PC1-3_5m 386	360.322	5447.63	1.75564	8.85881	0.797765	5.38169	1.07137	0.329831	0.703199	0.656352	1837.56	11.2433	1881.94	9.17416	1932.05	14.4732	1932.05	14.4732	95.1097
PC1-3_5m 387	1284.36	1926.41	1.68122	19.2477	2.13114	0.197534	2.52062	0.0301905	0.826185	0.32777	191.741	1.5608	183.038	4.22177	73.1714	56.6412	191.741	1.5608	262.043
PC1-3_5m 389	1139.3	1740.06	2.25976	18.832	1.79589	0.206423	2.16931	0.0313171	0.686032	0.316244	198.786	1.34292	190.547	3.76888	90.656	48.761	198.786	1.34292	219.275
PC1-3_5m 390	774.014	1250.08	3.75292	19.5743	2.64151	0.176104	3.56838	0.030419	0.824624	0.231092	193.17	1.5693	164.702	5.42535	NA	NA	193.17	1.5693
PC1-3_5m 391	696.51	2024.27	2.20827	17.4821	1.55698	0.412411	1.95486	0.0558635	0.768313	0.393027	350.42	2.62045	350.61	5.79588	352.872	40.5927	350.42	2.62045	99.3051
PC1-3_5m 392	338.839	3406.3	3.58162	14.0635	1.8058	1.58511	2.09071	0.160324	0.828356	0.396208	958.577	7.37827	964.379	13.0175	978.536	39.1161	978.536	39.1161	97.9603
PC1-3_5m 393	163.155	4370.2	1.68945	5.24844	0.73404	12.8379	1.13685	0.462636	0.858238	0.754928	2451.19	17.4997	2667.83	10.7096	2837.12	12.1546	2837.12	12.1546	86.3969
PC1-3_5m 394	395.264	782.004	1.43188	15.9478	7.87652	0.195015	9.27689	0.0301504	1.17066	0.126191	191.489	2.20872	180.899	15.373	45.7264	NA	191.489	2.20872	418.772
PC1-3_5m 396	95.2999	436.366	0.579656	15.0237	7.43421	0.296222	16.4806	0.0634342	2.06776	0.125466	396.477	7.95119	263.445	38.2602	NA	NA	396.477	7.95119
PC1-3_5m 397	925.77	3037.69	2.40106	18.4374	2.08727	0.412406	2.3708	0.057569	0.772034	0.325643	360.824	2.70916	350.606	7.02906	284.461	51.2477	360.824	2.70916	126.845
PC1-3_5m 398	431.397	8130.76	1.7134	9.38076	0.712911	4.51545	1.26562	0.296788	1.03661	0.819055	1675.36	15.2937	1733.82	10.5213	1805.88	13.2003	1805.88	13.2003	92.7726
PC1-3_5m 399	368.107	11228.3	1.59482	5.42421	0.678101	13.4324	1.01092	0.514946	0.74474	0.736694	2677.71	16.3188	2710.54	9.55378	2735.81	11.2479	2735.81	11.2479	97.8763
PC1-3_5m 400	659.506	1270.08	2.87761	16.6818	4.3171	0.20718	10.0993	0.0300597	0.831063	0.0822889	190.922	1.56342	191.183	17.6012	195.447	NA	190.922	1.56342	97.6845
PC1-3_5m 401	220.62	2868.93	0.687806	11.1678	1.72749	2.78663	1.89833	0.230913	0.746462	0.39322	1339.28	9.02707	1351.96	14.1859	1372.89	33.5787	1372.89	33.5787	97.5519
PC1-3_5m 402	238.533	744.384	1.77186	15.282	8.90125	0.366297	9.63573	0.0563333	0.832161	0.0863621	353.288	2.86082	316.905	26.2361	58.3594	NA	353.288	2.86082	605.366
PC1-3_5m 403	292.598	493.573	1.76578	14.4253	7.11566	0.167071	9.36017	0.0295975	1.71432	0.183151	188.029	3.17686	156.874	13.6064	NA	NA	188.029	3.17686
PC1-3_5m 404	78.2513	370.311	1.66229	10.6323	8.79105	0.708341	9.91014	0.0897898	1.45708	0.147029	554.294	7.73902	543.761	41.7467	500.831	216.295	554.294	7.73902	110.675
PC1-3_5m 405	164.037	3569.51	0.446325	8.34951	1.18425	5.77824	1.39198	0.345364	0.658255	0.47289	1912.42	10.8931	1943.16	12.0493	1976.84	21.8476	1976.84	21.8476	96.7415
PC1-3_5m 407	238.817	639.328	1.87537	16.4144	5.2296	0.311187	8.07097	0.0580315	0.903734	0.111973	363.643	3.19539	275.101	19.4521	NA	NA	363.643	3.19539
PC1-3_5m 408	83.1497	1873.37	4.67378	5.38574	0.965645	13.2478	1.31485	0.512556	0.856981	0.651769	2667.53	18.7206	2697.47	12.4144	2720.69	16.4324	2720.69	16.4324	98.0462
PC1-3_5m 409	298.073	470.223	3.03994	14.2822	8.99961	0.174226	12.259	0.0315354	1.89294	0.154413	200.151	3.73052	163.08	18.4711	NA	NA	200.151	3.73052
PC1-3_5m 410	205.975	263.449	1.79539	11.8648	10.7587	0.115528	19.0273	0.0297977	2.20236	0.115747	189.282	4.10806	111.01	20.0111	NA	NA	189.282	4.10806
PC1-3_5m 411	674.643	957.198	2.26537	17.6414	3.12516	0.186632	4.43692	0.0314388	0.813484	0.183344	199.547	1.59841	173.751	7.08578	NA	NA	199.547	1.59841
PC1-3_5m 412	808.454	1102.32	2.82439	18.0482	4.76915	0.180031	5.51257	0.0295659	0.787231	0.142807	187.831	1.45733	168.087	8.53981	NA	NA	187.831	1.45733
PC1-3_5m 413	512.184	414.223	1.66022	14.1896	7.96425	0.0888958	9.57981	0.0180289	1.76409	0.184147	115.186	2.01395	86.4743	7.94128	NA	NA	115.186	2.01395
PC1-3_5m 414	434.716	7049.42	2.44244	8.48486	0.662149	5.7254	0.928814	0.343066	0.632211	0.680664	1901.4	10.4102	1935.21	8.02889	1972.36	12.1258	1972.36	12.1258	96.4021
PC1-3_5m 415	277.615	1055.65	2.47799	16.4236	4.05699	0.58985	4.56813	0.087289	0.934688	0.204611	539.484	4.83726	470.772	17.2106	149.295	104.852	539.484	4.83726	361.354
PC1-3_5m 425	1362	1480.43	2.03004	17.7515	3.87415	0.117661	4.44299	0.0174806	0.895587	0.201573	111.713	0.991871	112.949	4.74931	140.097	102.219	111.713	0.991871	79.7398
PC1-3_5m 426	204.61	2618.12	2.32224	11.3699	1.67853	2.77622	1.89729	0.231495	0.71653	0.37766	1342.33	8.68284	1349.16	14.1641	1360.83	33.8544	1360.83	33.8544	98.6402
PC1-3_5m 427	633.718	1039.67	2.63838	18.1229	2.8162	0.181003	3.65861	0.0304893	0.786963	0.215099	193.61	1.50098	168.924	5.69359	NA	NA	193.61	1.50098
PC1-3_5m 428	866.617	2118.92	2.27569	17.7855	2.1995	0.368261	2.49196	0.0514477	0.771459	0.309579	323.403	2.43338	318.363	6.81026	282.661	54.2097	323.403	2.43338	114.414
PC1-3_5m 429	337.805	5536.07	1.38977	8.44471	0.808588	5.68269	1.12096	0.340187	0.761601	0.679418	1887.57	12.4623	1928.74	9.67912	1974.03	14.655	1974.03	14.655	95.6199
PC1-3_5m 430	674.802	903.054	2.4315	17.9289	4.23705	0.158586	5.26957	0.0280346	1.0725	0.203526	178.236	1.88539	149.465	7.32403	NA	NA	178.236	1.88539
PC1-3_5m 431	391.179	868.763	1.09113	15.9808	5.50565	0.306807	6.08861	0.046738	0.940134	0.154408	294.464	2.70608	271.703	14.5155	80.9202	NA	294.464	2.70608	363.894
PC1-3_5m 432	310.247	2521.06	2.56072	15.5352	4.70572	0.24663	5.97605	0.0292227	1.64196	0.274757	185.682	3.00533	223.835	12.0053	647.587	123.496	185.682	3.00533	28.6728
PC1-3_5m 433	1188.42	11860.7	6.9424	19.9651	3.15639	0.201523	3.44191	0.0284744	0.761676	0.221295	180.993	1.35941	186.414	5.86174	256.665	77.1913	180.993	1.35941	70.5173
PC1-3_5m 434	811.726	6978.17	2.81471	17.9828	5.71174	0.222816	6.068	0.0289128	0.869287	0.143258	183.74	1.57468	204.25	11.2274	449.053	133.54	183.74	1.57468	40.9173
PC1-3_5m 435	409.585	2980.92	1.71039	15.7235	4.24826	0.296996	5.67367	0.0351178	1.11458	0.196448	222.5	2.43764	264.051	13.1926	651.982	119.491	222.5	2.43764	34.1267
PC1-3_5m 436	916.035	5392.1	1.68124	17.5481	7.85428	0.240357	9.27169	0.0307503	0.851089	0.0917943	195.242	1.63677	218.713	18.2451	480.434	204.367	195.242	1.63677	40.6387
PC1-3_5m 437	549.093	51323	2.36663	9.1299	0.747252	4.89001	0.989778	0.310755	0.637275	0.643856	1744.42	9.73961	1800.54	8.34394	1866.92	13.6662	1866.92	13.6662	93.4384
PC1-3_5m 438	1233.01	11428.8	1.64962	18.9618	2.27175	0.211936	2.4928	0.0284282	0.833447	0.334341	180.703	1.48516	195.176	4.42635	374.91	52.8563	180.703	1.48516	48.1992
PC1-3_5m 439	159.551	744.424	3.17638	8.47397	27.2828	0.20469	28.5052	0.0140294	5.42894	0.190454	89.8109	4.84197	189.087	49.2169	1729.34	524.368	89.8109	4.84197	5.19338
PC1-3_5m 440	766.447	16984	1.10235	17.5996	2.27753	0.542737	2.42488	0.0661261	0.699185	0.288337	412.774	2.79559	440.228	8.66222	587.354	50.3943	412.774	2.79559	70.2768
PC1-3_5m 441	671.009	4969.64	11.5975	13.7886	0.969326	1.6755	1.2352	0.164028	0.716169	0.579801	979.121	6.5056	999.275	7.85442	1044.62	20.3199	1044.62	20.3199	93.7297
PC1-3_5m 442	367.352	521.993	2.10103	15.282	6.09944	0.165243	7.31433	0.0306025	1.61131	0.220294	194.318	3.08434	155.283	10.5324	NA	NA	194.318	3.08434
PC1-3_5m 443	213.86	5064.02	1.96552	5.13554	0.686045	14.5089	0.978338	0.514259	0.693872	0.709235	2674.79	15.1908	2783.59	9.29361	2864.12	11.2202	2864.12	11.2202	93.3896
PC1-3_5m 444	37.9927	98.3533	2.34283	6.53426	26.0784	-0.0461406	266.607	0.0474231	6.1284	0.0229866	298.681	17.8868	NA	-131.682	NA	NA	298.681	17.8868
PC1-3_5m 445	161.278	393.445	1.91745	15.1357	9.40332	0.19588	12.6255	0.0490388	1.46196	0.115794	308.618	4.40557	181.634	21.0012	NA	NA	308.618	4.40557
PC1-3_5m 447	852.553	1134.03	2.24694	18.3958	2.48049	0.179227	4.04133	0.0301519	0.883303	0.218568	191.499	1.66664	167.395	6.23684	NA	NA	191.499	1.66664
PC1-3_5m 448	374.807	6354.49	1.60612	6.45069	0.741678	8.07708	1.00136	0.366414	0.669631	0.668724	2012.51	11.5756	2239.68	9.04771	2455.06	12.588	2455.06	12.588	81.9737
PC1-3_5m 458	111.347	3101.1	1.20364	9.96938	2.36919	3.84529	2.75719	0.271592	0.742193	0.269185	1548.88	10.2189	1602.28	22.2216	1674.02	49.0878	1674.02	49.0878	92.5245
PC1-3_5m 459	1605.46	4680.91	2.74509	18.9211	1.73584	0.215526	2.2663	0.0293528	0.810555	0.357656	186.497	1.49	198.179	4.08023	340.621	47.9219	186.497	1.49	54.7519
PC1-3_5m 460	1697.16	4200.92	1.29238	17.7464	4.29727	0.131983	7.10073	0.0169037	0.787363	0.110885	108.058	0.843714	125.878	8.40661	478.032	156.165	108.058	0.843714	22.6047
PC1-3_5m 461	1252.47	5512.91	1.44525	17.9861	3.29285	0.265615	3.93333	0.0339654	0.69127	0.175747	215.319	1.46385	239.182	8.38208	481.495	85.5886	215.319	1.46385	44.7188
PC1-3_5m 463	309.051	7240.35	1.38762	10.6387	0.907794	3.48194	1.2512	0.257299	0.737293	0.58927	1476.01	9.72653	1523.13	9.87017	1590.03	18.8871	1590.03	18.8871	92.8291
PC1-3_5m 467	690.944	5451.74	5.48424	10.5739	0.88666	3.08774	2.08535	0.228309	0.859442	0.412134	1325.63	10.2979	1429.65	15.9956	1588.89	35.5065	1588.89	35.5065	83.4311
PC1-3_5m 473	816.984	3512.26	1.85093	17.9488	2.77715	0.217172	8.0927	0.0291669	0.923648	0.114133	185.332	1.68744	199.553	14.6624	372.101	181.276	185.332	1.68744	49.8069
PC1-3_5m 481	269.034	3151.18	3.43133	15.9368	4.69783	0.440126	5.67455	0.0522312	1.05657	0.186194	328.206	3.38091	370.341	17.6109	644.225	119.888	328.206	3.38091	50.9458
PC1-3_5m 482	378.039	1718.26	6.01135	11.2527	9.14012	0.191888	9.65058	0.0164179	1.87894	0.194697	104.977	1.95648	178.239	15.7772	1311.05	184.059	104.977	1.95648	8.00706
PC1-3_5m 483	142.585	16078.4	0.901798	7.99181	1.01122	7.48534	1.36819	0.375789	0.799231	0.58415	2056.58	14.0729	2171.23	12.2558	2282.16	19.1178	2282.16	19.1178	90.1155
PC1-3_5m 484	2579.51	22955.9	0.947974	19.4593	1.76911	0.230733	2.00068	0.0276294	0.755532	0.377637	175.695	1.3095	210.804	3.80853	624.814	39.946	175.695	1.3095	28.1195
PC1-3_5m 485	1073.43	9036.38	3.23194	19.4316	2.29708	0.257296	3.11169	0.0313752	0.733671	0.235779	199.15	1.43876	232.486	6.46588	585.549	65.6645	199.15	1.43876	34.0107
PC1-3_5m 486	902.081	11343.2	2.23885	18.7449	2.24157	0.314476	2.53823	0.0367122	0.774779	0.305244	232.422	1.76868	277.644	6.16597	679.364	51.6738	232.422	1.76868	34.2116
PC1-3_5m 487	406.151	116128	1.64085	2.76277	0.632622	46.7009	1.01709	0.784247	0.79631	0.782933	3732.45	22.5632	3924.4	10.1111	4024.65	9.44912	4024.65	9.44912	92.7398
PC1-3_5m 498	240.811	2723.99	1.54963	7.95523	0.797108	7.24084	1.04447	0.36348	0.657967	0.62995	1998.65	11.3072	2141.55	9.31874	2282.33	13.9663	2282.33	13.9663	87.5706
PC1-3_5m 499	664.919	648.879	2.96413	16.991	5.16234	0.197976	6.00949	0.0307321	0.97678	0.16254	195.129	1.87742	183.413	10.0843	36.0497	NA	195.129	1.87742	541.278
PC1-3_5m 500	2092.86	3735.82	2.20692	18.5163	1.11933	0.491729	1.37757	0.0591894	0.744622	0.540532	370.694	2.68241	406.088	4.61087	613.6	25.0508	370.694	2.68241	60.413
PC1-3_5m 501	877.565	779.571	1.89637	17.105	4.51611	0.188994	5.64409	0.0289473	1.0068	0.178381	183.957	1.82589	175.771	9.10971	68.0802	NA	183.957	1.82589	270.206
PC1-3_5m 502	383.631	3749.44	1.91276	9.02728	0.645027	5.02289	0.952556	0.323908	0.688966	0.723281	1808.79	10.8663	1823.19	8.06637	1840.45	11.9097	1840.45	11.9097	98.2795
PC1-3_5m 504	630.563	877.313	1.7276	16.769	5.01974	0.194984	5.76464	0.0317662	1.14574	0.198753	201.593	2.27399	180.873	9.55107	NA	NA	201.593	2.27399
PC1-3_5m 505	240.575	356.12	2.66485	11.8272	11.6226	0.18523	13.8735	0.0300463	1.30878	0.0943367	190.838	2.46104	172.551	22.0187	NA	NA	190.838	2.46104
PC1-3_5m 506	1142.95	2814.55	2.12699	18.1877	1.81499	0.410354	2.17612	0.0574019	1.00379	0.461273	359.806	3.51274	349.13	6.42909	279.725	44.1852	359.806	3.51274	128.628
PC1-3_5m 507	799.438	981.223	3.06084	17.3332	5.43795	0.155849	6.21538	0.0256882	1.13661	0.182871	163.506	1.83506	147.063	8.50964	NA	NA	163.506	1.83506
PC1-3_5m 508	843.607	1275.7	1.61454	18.729	3.39082	0.201562	3.86086	0.0339706	1.11217	0.288063	215.351	2.35551	186.447	6.57632	NA	NA	215.351	2.35551
PC1-3_5m 509	953.838	1323.99	2.35095	18.125	3.08812	0.178205	3.81144	0.028511	1.07978	0.2833	181.222	1.92955	166.515	5.85359	NA	NA	181.222	1.92955
PC1-3_5m 511	257.526	3395.47	1.68206	9.14714	1.04154	4.78118	1.46705	0.319494	0.997583	0.679991	1787.26	15.5713	1781.6	12.3201	1775.75	19.6293	1775.75	19.6293	100.648
PC1-3_5m 512	1047.85	4510.92	2.33549	18.8905	2.00645	0.402951	2.40915	0.0573568	1.11589	0.463189	359.531	3.90215	343.786	7.02605	239.707	49.2295	359.531	3.90215	149.987
PC1-3_5m 513	669.504	7239.98	1.65891	13.8195	1.38135	1.63846	1.80292	0.165174	1.11203	0.616791	985.467	10.1621	985.121	11.3687	985.241	28.8856	985.241	28.8856	100.023
PC1-3_5m 514	719.607	3733.05	1.99524	17.6857	2.05355	0.529378	2.40494	0.0713797	1.1031	0.458683	444.462	4.73768	431.397	8.45268	363.169	48.1977	444.462	4.73768	122.385
PC1-3_5m 515	230.624	523.329	2.97573	13.7161	5.62973	0.185165	50.2152	0.0294383	2.04172	0.0406594	187.032	3.7638	172.496	79.825	NA	NA	187.032	3.7638
PC1-3_5m 516	120.394	313.225	2.69762	12.2364	12.1725	0.152648	16.6182	0.0319878	1.99957	0.120324	202.977	3.99544	144.247	22.35	NA	NA	202.977	3.99544
PC1-3_5m 517	788.156	982.908	2.12827	15.9899	5.70385	0.1228	6.86635	0.0183344	1.25916	0.183382	117.121	1.46143	117.607	7.62536	128.515	NA	117.121	1.46143	91.1341
PC1-3_5m 518	742	3085.98	2.46564	18.7984	2.7976	0.392778	3.22652	0.0576712	1.13404	0.351475	361.447	3.98617	336.397	9.23937	167.638	70.5638	361.447	3.98617	215.612
PC1-3_5m 519	959.728	1070.01	2.27896	15.5885	5.27394	0.105988	5.75721	0.0149749	1.34775	0.234098	95.8189	1.28185	102.288	5.60211	256.789	128.716	95.8189	1.28185	37.3143
PC1-3_5m 520	992.925	2366.7	2.02615	18.6846	2.30071	0.203635	3.07979	0.0306681	1.10172	0.357725	194.728	2.11327	188.198	5.29069	108.054	67.9189	194.728	2.11327	180.214
PC1-3_5m 521	3864.88	6487.55	1.41206	19.5774	2.66574	0.103315	3.1623	0.0150754	0.849939	0.268773	96.4568	0.813721	99.8321	3.00676	182.191	70.983	96.4568	0.813721	52.9427
PC1-3_5m 522	485.201	1251.93	2.01601	15.7821	5.31568	0.175581	7.30045	0.0242137	1.71923	0.235497	154.232	2.62013	164.251	11.0719	312.178	161.628	154.232	2.62013	49.4052
PC1-3_5m 523	1520.76	8655.05	1.91837	19.1796	2.38486	0.225449	3.25232	0.0319326	0.854698	0.262797	202.632	1.70496	206.435	6.07548	251.047	72.2152	202.632	1.70496	80.7149
PC1-3_5m 524	344.149	2832.63	5.19338	17.0397	4.26237	0.43914	4.92354	0.0588313	0.944528	0.191839	368.514	3.3831	369.646	15.256	377.708	108.77	368.514	3.3831	97.5657
PC1-3_5m 525	603.847	28899.2	2.29975	5.69541	0.763361	12.1803	1.11547	0.498678	0.81286	0.728715	2608.11	17.436	2618.39	10.4673	2627.06	12.7018	2627.06	12.7018	99.2785
PC1-3_5m 526	812.931	2358.32	1.81896	17.464	3.24488	0.204313	3.65111	0.0287084	1.44337	0.395323	182.459	2.59664	188.769	6.28952	269.421	76.9133	182.459	2.59664	67.7229
PC1-3_5m 527	446.174	1803.72	2.76199	16.0691	7.6467	0.252031	9.6586	0.0333911	1.05617	0.10935	211.737	2.19997	228.224	19.7441	402.656	215.429	211.737	2.19997	52.5852
PC1-3_5m 528	906.497	3277.95	1.25541	17.9141	2.89364	0.214821	5.47905	0.0299855	0.846064	0.154418	190.457	1.58782	197.59	9.83816	284.604	123.879	190.457	1.58782	66.9202
PC1-3_5m 529	711.243	6869.84	1.65016	17.176	3.94422	0.235473	4.92304	0.0301158	0.931636	0.18924	191.273	1.75579	214.707	9.52761	481.141	106.874	191.273	1.75579	39.754
PC1-3_5m 530	791.326	8616.44	2.43129	18.801	3.11157	0.257769	4.06195	0.0359197	0.844998	0.208027	227.492	1.88877	232.867	8.45288	288.465	90.8203	227.492	1.88877	78.8629
PC1-3_5m 531	194.213	1559.23	3.73126	16.1857	11.1299	0.247612	11.8366	0.0339113	1.98674	0.167847	214.981	4.20069	224.635	23.8577	327.968	265.565	214.981	4.20069	65.5496
PC1-3_5m 532	189.941	1062.26	5.01853	10.8228	14.2488	0.218452	15.2903	0.0198244	2.42993	0.158919	126.546	3.04499	200.62	27.8422	1195.85	299.44	126.546	3.04499	10.5821
PC1-3_5m 533	111.993	10415	1.13828	6.67619	1.16099	8.95743	1.4837	0.433581	0.908297	0.612184	2321.84	17.709	2333.67	13.5531	2344.77	20.0643	2344.77	20.0643	99.0223
PC1-3_5m 534	46.0149	542.826	2.56743	8.31417	19.5607	0.651585	23.9145	0.0495429	6.5259	0.272885	311.715	19.8583	509.454	96.0848	1536.52	438.799	311.715	19.8583	20.287
PC1-3_5m 535	218.156	24956.1	1.48508	9.80481	1.07356	4.07722	1.40088	0.289515	0.798905	0.570287	1639.1	11.5627	1649.76	11.4232	1664.14	21.2961	1664.14	21.2961	98.4954
PC1-3_5m 536	144.403	9893.63	0.825178	10.5716	1.65304	3.37537	2.17189	0.260895	0.709524	0.326685	1494.42	9.46396	1498.7	17.0143	1505.55	38.7862	1505.55	38.7862	99.2606
PC1-3_5m 537	292.349	12083	1.93037	8.05072	0.720739	6.14879	1.23546	0.359756	0.75996	0.615123	1981.02	12.9615	1997.2	10.7903	2014.74	17.2742	2014.74	17.2742	98.3262
PC1-3_5m 538	1336.05	6424.97	2.63552	18.9377	2.46275	0.244506	2.81362	0.0349614	0.732952	0.260501	221.525	1.59609	222.104	5.61297	229.219	62.7709	221.525	1.59609	96.6437
PC1-3_5m 539	1408.77	10183.2	4.4415	17.8476	1.6831	0.433734	3.19478	0.0575648	0.780986	0.244457	360.799	2.74038	365.825	9.81384	398.759	69.443	360.799	2.74038	90.4803
PC1-3_5m 540	1350.85	4859.24	4.94456	18.9141	2.04259	0.21378	2.39043	0.0310772	0.732289	0.306342	197.287	1.42283	196.72	4.27499	190.962	52.941	197.287	1.42283	103.312
PC1-3_5m 541	563.964	4116.85	1.93083	17.6513	3.27907	0.367663	3.76311	0.0501706	0.996526	0.264815	315.569	3.069	317.92	10.2722	336.195	82.241	315.569	3.069	93.8648
PC1-3_5m 542	406.284	21228.4	2.44446	9.08741	0.707268	4.76345	1.01084	0.315493	0.710655	0.703035	1767.68	10.987	1778.48	8.48322	1791.95	13.0911	1791.95	13.0911	98.6455
PC1-3_5m 543	1022.24	5510.74	1.01747	17.8785	2.94896	0.301958	3.15846	0.0410671	0.758392	0.240114	259.444	1.92853	267.929	7.43813	343.758	69.3972	259.444	1.92853	75.4728
PC1-3_5m 544	323.672	13403.9	1.7332	9.11846	0.711699	4.74015	1.2901	0.316241	0.71678	0.555599	1771.35	11.1016	1774.37	10.8178	1778.7	19.5671	1778.7	19.5671	99.5863
PC1-3_5m 545	242.423	19604	1.47782	4.87101	0.601975	15.8288	0.992181	0.558834	0.785218	0.791406	2861.81	18.1465	2866.52	9.47607	2870.53	9.86112	2870.53	9.86112	99.6963
PC1-3_5m 546	169.645	5612.02	1.54405	10.2664	1.33446	3.58043	1.59463	0.272547	0.783769	0.491506	1553.72	10.8212	1545.2	12.6573	1534.38	26.1377	1534.38	26.1377	101.261
PC1-3_5m 547	142.169	7082.84	1.65108	7.0387	1.00454	7.85628	1.27442	0.404854	0.766004	0.601061	2191.35	14.2304	2214.68	11.4796	2237.07	17.6193	2237.07	17.6193	97.9564
PC1-3_5m 548	606.05	2458.52	1.78917	16.7559	4.41659	0.231028	5.63857	0.0310746	0.841401	0.149222	197.27	1.63469	211.047	10.7451	368.714	125.676	197.27	1.63469	53.5022
PC1-3_5m 549	157.377	197.256	2.66331	11.0845	11.7163	0.047931	55.8274	0.0284781	1.84164	0.032988	181.016	3.28729	47.5379	25.9332	NA	NA	181.016	3.28729
PC1-3_5m 550	197.25	446.721	2.51382	11.2649	11.4555	0.261092	13.1349	0.0335253	2.48954	0.189537	212.574	5.20582	235.547	27.6191	472.36	286.403	212.574	5.20582	45.0027
PC1-3_5m 551	766.136	2041.18	2.85271	17.924	4.98002	0.205244	5.24455	0.0304526	0.824806	0.157269	193.38	1.57133	189.554	9.06869	143.168	121.606	193.38	1.57133	135.072
PC1-3_5m 552	290.026	737.022	3.41731	12.8378	8.01691	0.260018	19.1528	0.0323417	1.82127	0.0950915	205.187	3.67817	234.681	40.1528	542.346	420.29	205.187	3.67817	37.8333
PC1-3_5m 553	139.968	2331.32	2.5619	8.72733	1.03781	5.12734	1.34359	0.331111	0.747501	0.556347	1843.76	11.9864	1840.65	11.4165	1837.9	20.2189	1837.9	20.2189	100.319
PC1-3_5m 554	318.418	2363.93	2.69735	14.8151	5.7257	0.286602	8.2939	0.0328029	0.942995	0.113697	208.067	1.93074	255.881	18.7618	721.488	175.13	208.067	1.93074	28.8386
PC1-3_5m 557	85.0386	1894.21	1.26623	5.42282	1.88435	13.13	3.26643	0.508504	2.65413	0.812547	2650.24	57.6767	2689.04	30.829	2719.04	31.382	2719.04	31.382	97.4697
PC1-3_5m 558	792.039	2788.39	2.76375	17.413	3.09717	0.345405	3.38762	0.0459215	0.761996	0.224935	289.433	2.15669	301.259	8.83104	394.868	74.0302	289.433	2.15669	73.2987
PC1-3_5m 559	196.441	2220.26	1.66816	13.0123	1.97513	1.82972	2.43172	0.180237	0.853485	0.35098	1068.27	8.40213	1056.18	15.9669	1032.13	46.004	1032.13	46.004	103.502
PC1-3_5m 561	505.287	661.026	2.27781	16.8214	4.37894	0.17398	7.09576	0.0327489	1.43891	0.202784	207.73	2.94139	162.867	10.6778	NA	NA	207.73	2.94139
PC1-3_5m 562	238.091	1976.72	7.24618	11.8638	1.30225	2.358	1.61135	0.208305	0.735307	0.456331	1219.78	8.17164	1229.98	11.4895	1248.76	28.0621	1248.76	28.0621	97.6789
PC1-3_5m 563	1084.48	2563.69	2.61805	18.1568	1.91991	0.393551	2.14399	0.0542329	0.667864	0.311506	340.457	2.21479	336.96	6.14802	313.889	46.3532	340.457	2.21479	108.464
PC1-3_5m 564	510.097	656.907	3.55101	16.8715	5.0112	0.178946	6.4425	0.0333148	1.01371	0.157348	211.261	2.10687	167.153	9.92946	NA	NA	211.261	2.10687
PC1-3_5m 565	695.013	791.412	3.87265	17.2608	4.04642	0.181552	5.07408	0.0315646	0.843289	0.166196	200.333	1.66341	169.395	7.91668	NA	NA	200.333	1.66341
PC1-3_5m 566	101.491	1189.94	0.857004	8.36141	1.35821	5.49766	1.63627	0.345433	0.719561	0.439758	1912.75	11.9094	1900.23	14.0583	1887.35	26.4564	1887.35	26.4564	101.346
PC1-3_5m 567	152.532	2157.54	1.43575	8.14545	2.11607	4.96676	3.38432	0.289845	0.962074	0.284274	1640.75	13.9366	1813.68	28.6122	2019.34	57.5238	2019.34	57.5238	81.2521
PC1-3_5m 568	653.253	648.229	1.60296	17.5739	4.61198	0.139958	5.78933	0.0281869	0.767346	0.132545	179.191	1.35608	133.007	7.21731	NA	NA	179.191	1.35608
PC1-3_5m 569	344.998	1064.34	0.820173	15.2891	4.71981	0.471346	6.19699	0.0610403	0.84666	0.136624	381.949	3.13987	392.118	20.1601	453.485	136.364	381.949	3.13987	84.2254
PC1-3_5m 570	667.612	870.966	4.25422	18.2468	2.52485	0.207138	4.00832	0.0367719	0.879501	0.219419	232.793	2.01089	191.148	6.98397	NA	NA	232.793	2.01089
PC1-3_5m 571	565.474	1058.75	2.13645	17.922	2.79501	0.293846	4.50499	0.0470331	1.15023	0.255323	296.281	3.33078	261.582	10.3891	NA	NA	296.281	3.33078
PC1-3_5m 573	373.948	421.928	3.79061	15.5285	6.91153	0.128577	10.0597	0.0303001	1.32226	0.131442	192.426	2.50678	122.819	11.6377	NA	NA	192.426	2.50678
PC1-3_5m 574	218.94	713.773	1.32175	16.1012	4.61655	0.521387	5.28737	0.0859784	0.920383	0.174072	531.709	4.69737	426.078	18.4008	NA	NA	531.709	4.69737
PC1-3_5m 575	481.374	522.234	1.78852	15.8001	8.09902	0.140901	9.8624	0.0277701	1.14934	0.116537	176.577	2.00192	133.846	12.3681	NA	NA	176.577	2.00192
PC1-3_5m 576	555.356	1284.23	0.876691	16.9848	3.50454	0.413327	3.8943	0.059447	0.776463	0.199384	372.261	2.8086	351.269	11.5646	215.74	88.3804	372.261	2.8086	172.551
PC1-3_5m 586	574.596	796.138	1.94994	16.4331	4.00586	0.175561	5.15812	0.028592	1.10029	0.213312	181.73	1.97164	164.233	7.8219	NA	NA	181.73	1.97164
PC1-3_5m 587	210.39	3050.39	1.15721	8.98027	0.997985	4.8637	1.34626	0.312776	0.852027	0.632884	1754.35	13.0862	1795.99	11.3389	1845.46	18.8591	1845.46	18.8591	95.0632
PC1-3_5m 588	363.439	435.421	2.34056	13.4597	10.9538	0.149881	14.6693	0.026072	1.39697	0.0952315	165.917	2.28825	141.807	19.4172	NA	NA	165.917	2.28825
PC1-3_5m 590	273.956	3543.19	1.69768	9.41876	1.01878	4.39522	1.35532	0.305116	0.858555	0.633471	1716.63	12.939	1711.44	11.2114	1705.89	19.3047	1705.89	19.3047	100.63
PC1-3_5m 592	410.733	639.363	1.12968	15.3605	6.98229	0.191394	9.06655	0.0326307	1.1375	0.125461	206.992	2.31713	177.818	14.7903	NA	NA	206.992	2.31713
PC1-3_5m 593	693.899	1765.59	2.57901	17.5344	3.26044	0.385772	3.59601	0.056561	0.969243	0.269532	354.677	3.34482	331.276	10.1649	171.002	80.8854	354.677	3.34482	207.411
PC1-3_5m 594	316.95	34149.9	2.20501	9.91863	0.832411	3.9999	1.07081	0.284443	0.654962	0.61165	1613.7	9.35007	1634.17	8.69844	1661.42	15.6824	1661.42	15.6824	97.1279
PC1-3_5m 595	232.985	2803.23	4.40813	14.7772	8.43258	0.238198	11.8806	0.0272111	2.11417	0.177952	173.07	3.61031	216.944	23.2109	725.519	248.712	173.07	3.61031	23.8546
PC1-3_5m 596	249.48	32380.1	5.60038	12.9686	1.7457	2.11389	1.87363	0.196882	0.639982	0.341574	1158.55	6.78644	1153.35	12.9156	1144.43	35.0191	1144.43	35.0191	101.234
PC1-3_5m 598	126.534	8406.8	2.53361	12.5512	2.54409	2.21536	2.82882	0.202842	0.704772	0.24914	1190.57	7.66154	1185.91	19.7927	1178.29	54.1893	1178.29	54.1893	101.042
PC1-3_5m 599	111.314	1544.83	3.25277	9.93603	20.4868	0.471317	20.92	0.0370629	2.59347	0.12397	234.602	5.97494	392.098	68.1475	1472.93	398.241	234.602	5.97494	15.9275
1. Analyses with >10% uncertainty (1-sigma) in 206Pb/238U age are not included.
2. Analyses with >10% uncertainty (1-sigma) in 206Pb/207Pb age are not included, unless 206Pb/238U age is <500 Ma.
3. Best age is determined from 206Pb/238U age for analyses with 206Pb/238U age <1000 Ma and from 206Pb/207Pb age for analyses with 206Pb/238Uage > 1000 Ma.
4. Concordance is based on 206Pb/238U age / 206Pb/207Pb age. Value is not reported for 206Pb/238U ages <500 Ma because of large uncertainty in 206Pb/207Pb age.
5. Analyses with 206Pb/238U age > 500 Ma and with >20% discordance (<80% concordance) are not included.
6. Analyses with 206Pb/238U age > 500 Ma and with >5% reverse discordance (<105% concordance) are not included.
7. All uncertainties are reported at the 1-sigma level, and include only measurement errors.
8. Analyses conducted by LA-MC-ICPMS, as described by Gehrels et al. (2008).
9. U concentration and U/Th are calibrated relative to Sri Lanka zircon standard and are accurate to ~20%.
10. Common Pb correction is from measured 204Pb with common Pb composition interpreted from Stacey and Kramers (1975).
11. Common Pb composition assigned uncertainties of 1.5 for 206Pb/204Pb, 0.3 for 207Pb/204Pb, and 2.0 for 208Pb/204Pb.
12. U/Pb and 206Pb/207Pb fractionation is calibrated relative to fragments of a large Sri Lanka zircon of 563.5 ± 3.2 Ma (2-sigma).
13. U decay constants and composition as follows: 235U = 9.8485 x 10-10, 238U = 1.55125 x 10-10, 238U/235U = 137.88.
14. Weighted mean and concordia plots determined with Isoplot (Ludwig, 2008).

## Sheet: CANT-BASE-PC
Internal Uncertainty Level	one sigma
External Uncertainty 206/238 (% two sigma)	1
External Uncertainty 206/207 (% two sigma)	0.8
							Isotope ratios						Apparent ages (Ma)
Analysis	U	206Pb	U/Th	206Pb*	±	207Pb*	±	206Pb*	±	error	206Pb*	±	207Pb*	±	206Pb*	±	Best age	±	Conc
	(ppm)	204Pb		207Pb*	(%)	235U*	(%)	238U	(%)	corr.	238U*	(Ma)	235U	(Ma)	207Pb*	(Ma)	(Ma)	(Ma)	(%)
CANT-BASE-PC-2	316.45	14575	1.78845	21.1709	11.9338	0.0900149	12.1485	0.0138214	2.27342	0.187137	88.4884	1.99797	87.5172	10.187	61.1296	285.204	88.4884	1.99797	NA
CANT-BASE-PC-78	163.711	13473.3	2.86476	20.1507	10.1965	0.135044	10.6232	0.0197362	2.98062	0.280576	125.988	3.71877	128.62	12.8343	177.5	238.274	125.988	3.71877	NA
CANT-BASE-PC-22	107.075	4896.44	2.15546	17.9836	10.6181	0.176434	11.2119	0.0230121	3.60047	0.321128	146.664	5.22099	164.987	17.0752	436.66	236.969	146.664	5.22099	NA
CANT-BASE-PC-32	565.042	91904.9	1.77539	20.3421	1.81018	0.183531	2.20012	0.0270772	1.25052	0.568387	172.229	2.12525	171.094	3.46424	155.429	42.3901	172.229	2.12525	NA
CANT-BASE-PC-70	385.289	44568.9	2.84533	19.6812	3.86342	0.196383	4.3293	0.028032	1.95368	0.451269	178.219	3.43415	182.061	7.21586	232.189	89.2407	178.219	3.43415	NA
CANT-BASE-PC-95	100.916	11119.7	1.54765	19.5471	14.6259	0.199489	14.9171	0.0282812	2.9333	0.196639	179.782	5.20068	184.693	25.1957	247.986	338.251	179.782	5.20068	NA
CANT-BASE-PC-43	94.8245	5813.68	1.31983	20.6382	16.2753	0.189851	16.5682	0.0284174	3.10185	0.187217	180.636	5.52528	176.502	26.849	121.485	385.624	180.636	5.52528	NA
CANT-BASE-PC-34	234.118	16821.8	1.67921	20.5889	8.29095	0.19047	8.41832	0.0284419	1.45888	0.173298	180.789	2.60085	177.03	13.677	127.14	195.415	180.789	2.60085	NA
CANT-BASE-PC-84	421.614	50700.9	2.95031	20.1237	3.02234	0.196041	4.24265	0.0286124	2.9775	0.701803	181.858	5.33916	181.771	7.06115	180.622	70.46	181.858	5.33916	NA
CANT-BASE-PC-4	415.9	34561.7	2.15581	20.3077	3.12664	0.194737	3.56497	0.0286819	1.71262	0.480404	182.293	3.07827	180.663	5.90019	159.383	73.1665	182.293	3.07827	NA
CANT-BASE-PC-83	379.075	35744.6	1.59966	19.948	3.99233	0.200308	4.38307	0.0289798	1.80903	0.412732	184.16	3.28438	185.387	7.42713	201.046	92.726	184.16	3.28438	NA
CANT-BASE-PC-44	208.622	50017.9	2.24826	20.3633	7.03524	0.197098	7.08987	0.0291092	0.878484	0.123907	184.971	1.60185	182.668	11.8534	152.963	164.965	184.971	1.60185	NA
CANT-BASE-PC-72	50.9668	6324.99	2.70673	21.3146	30.2844	0.189822	30.6575	0.0293442	4.76806	0.155527	186.443	8.76238	176.478	49.7025	44.9446	738.528	186.443	8.76238	NA
CANT-BASE-PC-11	414.611	37767.5	2.99098	20.4545	3.42433	0.19827	3.97679	0.0294134	2.02209	0.508473	186.876	3.72455	183.661	6.68146	142.487	80.4013	186.876	3.72455	NA
CANT-BASE-PC-35	298.454	15077.2	2.39817	20.0603	6.96143	0.204359	7.15348	0.0297324	1.64646	0.230162	188.873	3.06461	188.808	12.3256	187.965	162.187	188.873	3.06461	NA
CANT-BASE-PC-31	262.482	39609.3	1.17747	20.7465	4.28359	0.198238	4.63402	0.0298285	1.76778	0.381479	189.475	3.30076	183.634	7.78467	109.145	101.189	189.475	3.30076	NA
CANT-BASE-PC-1	462.324	30369.7	3.04055	20.0361	3.51835	0.206655	4.27855	0.0300303	2.43458	0.569019	190.738	4.57563	190.742	7.44042	190.818	81.8548	190.738	4.57563	NA
CANT-BASE-PC-23	244.292	31574.9	2.962	19.5561	6.64112	0.213844	6.99188	0.0303304	2.18676	0.312757	192.616	4.14974	196.773	12.5078	246.938	153.04	192.616	4.14974	NA
CANT-BASE-PC-47	225.688	12880.9	2.48689	19.4163	4.92896	0.215637	5.17697	0.0303662	1.58313	0.305803	192.84	3.00769	198.272	9.32476	263.404	113.201	192.84	3.00769	NA
CANT-BASE-PC-27	177.71	26460.8	1.69472	20.2078	5.77526	0.208223	6.03216	0.0305174	1.74168	0.288732	193.785	3.32489	192.061	10.556	170.893	134.929	193.785	3.32489	NA
CANT-BASE-PC-12	338.155	58896.7	1.29368	20.0862	4.08924	0.211238	4.38854	0.0307729	1.59292	0.362973	195.384	3.06562	194.591	7.77142	184.964	95.2591	195.384	3.06562	NA
CANT-BASE-PC-17	220.649	68283.3	2.28778	19.7137	3.59864	0.216666	3.87705	0.0309784	1.44265	0.372101	196.669	2.7944	199.131	7.01064	228.389	83.1607	196.669	2.7944	NA
CANT-BASE-PC-77	421.623	48538.7	3.78374	19.9031	3.0127	0.216419	3.41155	0.0312403	1.60072	0.469206	198.306	3.126	198.925	6.16311	206.26	69.8952	198.306	3.126	NA
CANT-BASE-PC-92	547.284	86115.9	4.71591	19.9417	2.61807	0.216329	2.83725	0.0312878	1.09349	0.385404	198.603	2.13859	198.849	5.12383	201.777	60.8063	198.603	2.13859	NA
CANT-BASE-PC-50	176.966	25593.7	2.23197	22.0046	6.95996	0.196544	7.45312	0.031367	2.66607	0.357712	199.098	5.22696	182.198	12.4314	-31.7132	168.954	199.098	5.22696	NA
CANT-BASE-PC-80	204.157	79752	2.54679	18.5179	4.71738	0.233888	5.5239	0.0314121	2.87398	0.520282	199.38	5.64246	213.403	10.6322	371.104	106.288	199.38	5.64246	NA
CANT-BASE-PC-71	455.756	49071.6	1.52359	20.0882	2.88392	0.215824	3.15484	0.0314441	1.27907	0.405431	199.58	2.51366	198.429	5.68646	184.736	67.1889	199.58	2.51366	NA
CANT-BASE-PC-94	548.902	71727	1.73669	20.1088	1.50989	0.216913	2.20297	0.0316351	1.60415	0.728177	200.774	3.17108	199.337	3.98719	182.348	35.1601	200.774	3.17108	NA
CANT-BASE-PC-19	165.181	18872.8	2.00997	20.4022	6.52214	0.213836	6.92035	0.0316415	2.31364	0.334324	200.814	4.57449	196.767	12.3794	148.514	153.015	200.814	4.57449	NA
CANT-BASE-PC-20	254.819	22131.2	5.01941	20.1291	5.443	0.217481	5.63829	0.03175	1.47108	0.260909	201.492	2.91826	199.811	10.2271	179.999	126.966	201.492	2.91826	NA
CANT-BASE-PC-10	91.4007	8244.6	2.55275	22.4728	19.8693	0.203642	20.0651	0.0331913	2.79651	0.139372	210.491	5.79133	188.203	34.4833	-83.0257	490.66	210.491	5.79133	NA
CANT-BASE-PC-96	161.94	12877.7	3.60179	20.5536	9.48843	0.224169	10.0452	0.0334165	3.29783	0.3283	211.896	6.87437	205.373	18.6798	131.138	223.56	211.896	6.87437	NA
CANT-BASE-PC-53	64.9584	7418.59	1.83702	18.5987	19.6965	0.250327	19.9535	0.0337668	3.19212	0.159978	214.08	6.72147	226.842	40.585	361.289	448.186	214.08	6.72147	NA
CANT-BASE-PC-55	68.355	12461.8	1.8314	19.1441	11.4429	0.276629	11.8037	0.0384089	2.89597	0.245344	242.963	6.9052	247.98	25.9762	295.703	261.933	242.963	6.9052	NA
CANT-BASE-PC-67	290.149	55738.5	1.23045	19.3892	1.94307	0.295804	4.5018	0.041597	4.06087	0.902055	262.725	10.4544	263.118	10.4351	266.598	44.5623	262.725	10.4544	NA
CANT-BASE-PC-75	68.3278	7852.65	1.41199	19.8051	13.3629	0.309433	13.6747	0.044447	2.90354	0.21233	280.339	7.96529	273.741	32.8232	217.685	310.517	280.339	7.96529	NA
CANT-BASE-PC-8	251.728	52060.8	1.42448	19.3638	4.25403	0.368451	5.35254	0.051745	3.24852	0.606912	325.226	10.303	318.505	14.6342	269.603	97.5881	325.226	10.303	NA
CANT-BASE-PC-97	236.935	37702.1	1.13502	18.6557	2.30813	0.396032	3.59887	0.0535848	2.76123	0.76725	336.493	9.05303	338.767	10.3668	354.39	52.126	336.493	9.05303	NA
CANT-BASE-PC-85	334.905	161933	2.42919	18.8852	2.11331	0.392905	3.20012	0.0538155	2.40306	0.750929	337.904	7.91091	336.489	9.16588	326.744	47.9498	337.904	7.91091	NA
CANT-BASE-PC-54	370.532	20509.1	1.26186	18.5943	3.42663	0.409976	3.9968	0.0552886	2.05733	0.514745	346.909	6.94844	348.858	11.8007	361.83	77.3082	346.909	6.94844	NA
CANT-BASE-PC-62	328.341	23220.2	2.44925	18.4441	2.40955	0.419675	2.66391	0.0561395	1.136	0.426439	352.105	3.89262	355.818	7.99619	380.093	54.185	352.105	3.89262	NA
CANT-BASE-PC-73	566.518	184263	2.86244	18.5542	0.916545	0.443943	1.65284	0.0597403	1.37544	0.832166	374.046	4.99836	373.029	5.15991	366.692	20.6511	374.046	4.99836	NA
CANT-BASE-PC-21	146.007	28711	1.26103	18.1813	3.31597	0.4592	4.33642	0.0605517	2.79443	0.64441	378.98	10.285	383.701	13.8572	412.263	74.1665	378.98	10.285	NA
CANT-BASE-PC-82	646.746	99331.1	4.73666	18.4721	1.4971	0.458014	2.81111	0.0613613	2.37929	0.846389	383.899	8.86743	382.876	8.96678	376.673	33.6772	383.899	8.86743	NA
CANT-BASE-PC-15	487.253	138806	1.06416	18.3485	1.37401	0.465397	1.9738	0.0619331	1.41704	0.717924	387.371	5.32754	388.004	6.36513	391.761	30.8311	387.371	5.32754	NA
CANT-BASE-PC-13	244.227	80964.4	2.31567	18.2531	2.35361	0.484986	3.14781	0.0642042	2.09027	0.66404	401.143	8.12942	401.488	10.439	403.452	52.6958	401.143	8.12942	99.4277
CANT-BASE-PC-29	396.171	28462.4	0.690426	18.0812	1.37935	0.504235	2.19512	0.0661239	1.70762	0.777915	412.761	6.82748	414.565	7.47161	424.598	30.7943	412.761	6.82748	97.2122
CANT-BASE-PC-104	316.614	53156.7	3.31938	18.1958	1.72259	0.508034	2.00707	0.0670445	1.03006	0.513215	418.325	4.17217	417.126	6.86565	410.48	38.5286	418.325	4.17217	101.911
CANT-BASE-PC-60	553.028	73049.9	1.97072	17.8809	0.649791	0.529587	2.16422	0.0686793	2.06437	0.953863	428.194	8.55231	431.535	7.60855	449.392	14.456	428.194	8.55231	95.2828
CANT-BASE-PC-74	324.819	83075.4	2.43059	17.7621	1.25677	0.591065	3.51194	0.0761428	3.27936	0.933777	473.058	14.9578	471.548	13.2479	464.211	27.8688	473.058	14.9578	101.906
CANT-BASE-PC-26	126.483	27605.8	1.27445	17.581	2.87138	0.688944	3.57918	0.087847	2.13675	0.596995	542.791	11.1233	532.166	14.8256	486.859	63.3904	542.791	11.1233	111.488
CANT-BASE-PC-106	337.05	88142.5	1.24895	16.9406	1.05686	0.756942	1.74061	0.0930014	1.38303	0.794566	573.263	7.58612	572.244	7.61458	568.22	23.0122	573.263	7.58612	100.888
CANT-BASE-PC-102	94.96	33827.5	1.27521	16.9391	3.16376	0.768874	3.3307	0.0944594	1.04125	0.312622	581.857	5.79322	579.117	14.7013	568.404	68.8786	581.857	5.79322	102.367
CANT-BASE-PC-61	231.505	56715.4	1.86108	16.6691	1.79876	0.788035	2.31897	0.09527	1.46358	0.631136	586.629	8.20673	590.056	10.3779	603.24	38.9471	586.629	8.20673	97.2465
CANT-BASE-PC-18	296.137	66160.4	0.921295	16.5111	1.62811	0.819875	2.83262	0.0981798	2.31797	0.818313	603.733	13.359	607.979	12.9583	623.812	35.1215	603.733	13.359	96.7813
CANT-BASE-PC-49	103.005	38493.1	1.27267	16.7643	2.26817	0.812118	3.42286	0.098742	2.56346	0.748925	607.032	14.8509	603.641	15.5771	590.91	49.1979	607.032	14.8509	102.728
CANT-BASE-PC-69	71.3946	37665	2.13473	14.2906	1.81073	1.5101	2.84367	0.156515	2.19265	0.771064	937.38	19.129	934.479	17.3726	927.627	37.1872	927.627	37.1872	101.051
CANT-BASE-PC-105	63.5684	48699	1.28133	14.0395	1.58615	1.61746	3.55398	0.164696	3.18039	0.894882	982.823	28.9917	977.004	22.3032	963.964	32.3854	963.964	32.3854	101.956
CANT-BASE-PC-107	129.012	56079.9	2.03248	14.0247	1.9235	1.64903	2.26952	0.167734	1.20452	0.530736	999.613	11.1534	989.179	14.3461	966.123	39.2556	966.123	39.2556	103.466
CANT-BASE-PC-64	33.2799	45415.3	1.34464	13.9048	6.98911	1.6095	7.68748	0.162314	3.20153	0.41646	969.622	28.8211	973.913	48.1807	983.624	142.454	983.624	142.454	98.5765
CANT-BASE-PC-48	58.4572	20577.7	3.16176	13.6132	1.95626	1.72309	2.4735	0.170124	1.51369	0.611961	1012.8	14.187	1017.18	15.8936	1026.6	39.5908	1026.6	39.5908	98.6552
CANT-BASE-PC-56	467.087	216662	3.87771	13.5831	0.403056	1.70395	1.67999	0.167862	1.63093	0.970794	1000.32	15.1118	1010.02	10.7501	1031.08	8.1478	1031.08	8.1478	97.0171
CANT-BASE-PC-98	71.6192	66827.5	2.42349	13.579	1.67625	1.83024	2.48041	0.180249	1.82829	0.737091	1068.34	17.9997	1056.36	16.2883	1031.68	33.8992	1031.68	33.8992	103.553
CANT-BASE-PC-37	177.785	168571	2.62609	13.4915	0.863445	1.71946	3.45689	0.168249	3.34732	0.968304	1002.45	31.0767	1015.82	22.197	1044.73	17.4354	1044.73	17.4354	95.9531
CANT-BASE-PC-28	15.4223	5577.53	2.92597	13.1366	7.53909	1.87802	8.35938	0.17893	3.61128	0.432003	1061.12	35.3328	1073.36	55.4423	1098.29	151.06	1098.29	151.06	96.6162
CANT-BASE-PC-24	132.48	64258.5	2.42124	13.1105	1.09159	1.95403	1.95874	0.185801	1.62638	0.830316	1098.59	16.4277	1099.83	13.1568	1102.31	21.8122	1102.31	21.8122	99.6623
CANT-BASE-PC-100	32.6777	25462.6	1.58718	13.0181	6.38928	1.92983	6.686	0.182208	1.9697	0.294601	1079.03	19.5701	1091.48	44.746	1116.43	127.628	1116.43	127.628	96.6493
CANT-BASE-PC-66	45.0266	85493.5	5.84889	12.7245	3.05407	2.14819	4.08769	0.19825	2.71697	0.66467	1165.91	28.9782	1164.47	28.3291	1161.77	60.5377	1161.77	60.5377	100.356
CANT-BASE-PC-45	47.933	60808.8	1.34506	12.6404	2.4393	2.15474	2.99028	0.197539	1.72963	0.578417	1162.09	18.3923	1166.58	20.7412	1174.95	48.2693	1174.95	48.2693	98.9053
CANT-BASE-PC-38	142.749	121784	2.82793	12.6205	0.878438	2.11831	1.50465	0.193895	1.22161	0.811888	1142.44	12.7894	1154.79	10.3789	1178.06	17.3728	1178.06	17.3728	96.9765
CANT-BASE-PC-88	150.329	47443.3	3.3249	12.475	1.61418	2.20074	2.19361	0.199117	1.48538	0.677141	1170.57	15.9003	1181.28	15.3158	1200.92	31.837	1200.92	31.837	97.4731
CANT-BASE-PC-63	173.135	116712	3.59673	11.4622	1.22802	2.77733	4.94643	0.230883	4.79157	0.968692	1339.13	57.9407	1349.46	36.945	1365.86	23.6478	1365.86	23.6478	98.0429
CANT-BASE-PC-65	87.6545	73534.7	2.53954	11.3941	1.18624	2.89959	2.1204	0.239616	1.75754	0.828871	1384.7	21.9005	1381.81	16.0104	1377.32	22.806	1377.32	22.806	100.536
CANT-BASE-PC-57	50.6147	34768	2.89945	10.8723	1.66139	3.12938	3.71503	0.246763	3.32284	0.894431	1421.76	42.3965	1439.94	28.5944	1466.89	31.5547	1466.89	31.5547	96.9236
CANT-BASE-PC-25	119.003	97777.1	2.13096	10.8085	0.49133	3.21886	1.4649	0.252327	1.38005	0.942076	1450.47	17.9251	1461.71	11.3492	1478.07	9.31727	1478.07	9.31727	98.1328
CANT-BASE-PC-79	676.721	514148	2.86633	10.6753	0.138788	3.243	1.12492	0.251086	1.11633	0.99236	1444.08	14.4426	1467.5	8.73045	1501.55	2.62363	1501.55	2.62363	96.1727
CANT-BASE-PC-101	278.494	236644	1.48327	10.6145	0.508511	3.54957	0.971421	0.273258	0.827693	0.852043	1557.32	11.451	1538.34	7.69575	1512.33	9.59753	1512.33	9.59753	102.974
CANT-BASE-PC-46	76.3416	45312.2	1.0847	10.2226	0.957264	3.74179	2.2521	0.277422	2.03853	0.905168	1578.37	28.5394	1580.36	18.0468	1583	17.9015	1583	17.9015	99.7076
CANT-BASE-PC-6	75.5937	111159	0.798355	9.97375	0.790139	3.81499	3.21773	0.275963	3.11921	0.969382	1571	43.4892	1595.91	25.8924	1628.95	14.6879	1628.95	14.6879	96.4421
CANT-BASE-PC-87	134.36	88114.4	0.805419	9.85544	0.495475	4.02833	0.969351	0.287939	0.833154	0.859497	1631.22	12.0074	1639.93	7.88535	1651.11	9.18516	1651.11	9.18516	98.7956
CANT-BASE-PC-5	189.492	213510	1.1162	9.67616	0.317323	4.1496	2.17463	0.291211	2.15136	0.989296	1647.58	31.2784	1664.13	17.7948	1685.06	5.85715	1685.06	5.85715	97.7755
CANT-BASE-PC-100	425.962	595633	3.14762	9.18917	0.195114	4.80541	1.53412	0.320262	1.52166	0.991879	1791.01	23.7949	1785.85	12.8946	1779.8	3.55714	1779.8	3.55714	100.63
CANT-BASE-PC-7	37.6647	58543.9	0.92484	9.16942	1.87891	4.80847	2.40777	0.319777	1.50566	0.625337	1788.64	23.5177	1786.38	20.2417	1783.72	34.2549	1783.72	34.2549	100.276
CANT-BASE-PC-40	75.9835	49520.7	0.879174	8.96889	0.751179	4.9274	2.73795	0.32052	2.63289	0.961628	1792.27	41.1972	1806.96	23.1145	1823.94	13.6261	1823.94	13.6261	98.2639
CANT-BASE-PC-42	28.331	22703.9	1.29973	8.93445	2.19128	5.03793	2.9687	0.326452	2.00287	0.674662	1821.16	31.7762	1825.72	25.1565	1830.91	39.7212	1830.91	39.7212	99.4674
CANT-BASE-PC-39	223.593	157785	2.34494	8.92776	0.157604	5.01009	1.70068	0.324405	1.69336	0.995697	1811.2	26.7384	1821.03	14.3961	1832.27	2.85632	1832.27	2.85632	98.8503
CANT-BASE-PC-91	126.213	237431	1.92095	8.89121	0.46963	5.26235	1.82841	0.339344	1.76707	0.966451	1883.51	28.8618	1862.78	15.602	1839.7	8.50364	1839.7	8.50364	102.381
CANT-BASE-PC-41	58.2781	61311.1	3.65098	8.80778	1.02859	5.07507	1.85146	0.324196	1.53945	0.831477	1810.19	24.2963	1831.95	15.7061	1856.75	18.585	1856.75	18.585	97.4922
CANT-BASE-PC-86	80.3305	314832	2.98026	8.74699	0.699424	5.33019	2.19689	0.338143	2.08257	0.947966	1877.73	33.925	1873.72	18.7851	1869.26	12.6195	1869.26	12.6195	100.453
CANT-BASE-PC-30	224.403	294301	2.47805	8.56996	0.40146	5.4321	1.58387	0.337633	1.53214	0.967344	1875.27	24.9303	1889.93	13.5828	1906.06	7.21151	1906.06	7.21151	98.3847
CANT-BASE-PC-68	64.6975	108731	1.13855	8.53142	0.931564	5.60635	2.08904	0.346897	1.86984	0.895069	1919.76	31.045	1917.08	18.0029	1914.15	16.7161	1914.15	16.7161	100.293
CANT-BASE-PC-59	387.215	856376	3.96746	7.83293	0.351369	6.31462	1.92941	0.358732	1.89715	0.983278	1976.16	32.2894	2020.49	16.9142	2066.07	6.1952	2066.07	6.1952	95.6483
CANT-BASE-PC-93	60.8506	64758.8	1.6942	7.73193	1.08531	6.93555	2.01853	0.388927	1.70194	0.843155	2117.85	30.7223	2103.22	17.9149	2088.92	19.0848	2088.92	19.0848	101.385
CANT-BASE-PC-9	131.53	159476	2.75181	7.72655	0.25842	6.9166	1.6149	0.387594	1.59409	0.987113	2111.66	28.7044	2100.79	14.3271	2090.14	4.54399	2090.14	4.54399	101.03
CANT-BASE-PC-52	164.826	250004	3.17349	7.60212	0.242155	6.91003	1.96648	0.38099	1.95152	0.992389	2080.91	34.7071	2099.95	17.4448	2118.64	4.24442	2118.64	4.24442	98.219
CANT-BASE-PC-58	179.362	227365	2.01555	7.29168	0.311366	7.36952	2.53028	0.389731	2.51105	0.9924	2121.58	45.3958	2157.28	22.6261	2191.41	5.41141	2191.41	5.41141	96.8134
CANT-BASE-PC-36	227.417	381052	2.34289	6.74205	2.05781	8.97334	9.19653	0.438778	8.96334	0.974644	2345.17	176.257	2335.3	84.2095	2326.67	35.2626	2326.67	35.2626	100.795
CANT-BASE-PC-33	92.4379	106519	6.17315	6.49763	0.535186	9.348	2.07725	0.440527	2.00712	0.966241	2353	39.5685	2372.74	19.056	2389.73	9.10868	2389.73	9.10868	98.4632
CANT-BASE-PC-108	60.6782	177405	1.39034	6.00718	0.952616	10.967	4.12871	0.477813	4.01731	0.973018	2517.73	83.7368	2520.34	38.4374	2522.42	15.9994	2522.42	15.9994	99.8142
CANT-BASE-PC-89	129.975	152927	1.23217	5.96494	0.253553	11.0496	0.938946	0.478028	0.904063	0.962849	2518.67	18.849	2527.32	8.74289	2534.27	4.25415	2534.27	4.25415	99.3845
CANT-BASE-PC-51	26.7937	25257.4	0.589373	5.8314	0.721823	11.0477	3.19423	0.467242	3.11161	0.974133	2471.46	63.8789	2527.16	29.7501	2572.18	12.0662	2572.18	12.0662	96.0841
CANT-BASE-PC-76	188.996	393892	2.9052	5.72303	0.209686	11.434	4.53169	0.474593	4.52684	0.998929	2503.67	93.9275	2559.2	42.3379	2603.48	3.49458	2603.48	3.49458	96.1662
CANT-BASE-PC-14	67.9918	129756	1.16316	5.34782	0.377649	13.4651	2.3317	0.522258	2.30092	0.986797	2708.75	50.8891	2712.84	22.0424	2715.87	6.22699	2715.87	6.22699	99.7377
CANT-BASE-PC-90	71.662	277703	3.37026	5.01019	0.657407	15.4985	2.6007	0.563174	2.51623	0.967524	2879.73	58.4409	2846.39	24.8114	2822.86	10.7305	2822.86	10.7305	102.015
1. Analyses with >10% uncertainty (1-sigma) in 206Pb/238U age are not included.
2. Analyses with >10% uncertainty (1-sigma) in 206Pb/207Pb age are not included, unless 206Pb/238U age is <400 Ma.
3. Best age is determined from 206Pb/238U age for analyses with 206Pb/238U age <900 Ma and from 206Pb/207Pb age for analyses with 206Pb/238Uage >900 Ma.
4. Concordance is based on 206Pb/238U age / 206Pb/207Pb age. Value is not reported for 206Pb/238U ages <400 Ma because of large uncertainty in 206Pb/207Pb age.
5. Analyses with 206Pb/238U age >400 Ma and with >20% discordance (<80% concordance) are not included.
6. Analyses with 206Pb/238U age >400 Ma and with >5% reverse discordance (<105% concordance) are not included.
7. All uncertainties are reported at the 2-sigma level, and include only measurement errors.
8. Analyses conducted by LA-ICPMS, as described by Gehrels et al. (2008) and Gehrels and Pecha (2014).
9. U concentration and U/Th are calibrated relative to FC-1 zircon standard and are accurate to ~20%.
10. Common Pb correction is from measured 204Pb with common Pb composition interpreted from Stacey and Kramers (1975).
11. Common Pb composition assigned uncertainties of 1.5 for 206Pb/204Pb, 0.3 for 207Pb/204Pb, and 2.0 for 208Pb/204Pb.
12. U/Pb and 206Pb/207Pb fractionation is calibrated relative to fragments of large Sri Lanka zircons and individual crystals of FC-1, and R33.
13. U decay constants and composition as follows: 238U = 9.8485 x 10-10, 235U = 1.55125 x 10-10, 238U/235U = 137.82.
14. Weighted mean and concordia plots determined with Isoplot (Ludwig, 2008).

## Sheet: CANT-TOP-PC
Internal Uncertainty Level	one sigma
External Uncertainty 206/238 (% two sigma)	0.9
External Uncertainty 206/207 (% two sigma)	0.8
							Isotope ratios						Apparent ages (Ma)
Analysis	U	206Pb	U/Th	206Pb*	±	207Pb*	±	206Pb*	±	error	206Pb*	±	207Pb*	±	206Pb*	±	Best age	±	Conc
	(ppm)	204Pb		207Pb*	(%)	235U*	(%)	238U	(%)	corr.	238U*	(Ma)	235U	(Ma)	207Pb*	(Ma)	(Ma)	(Ma)	(%)
CANTOP PC-2	589.215	22417.9	4.50789	21.3465	9.40837	0.094558	9.65734	0.0146394	2.1787	0.2256	93.6876	2.02641	91.7405	8.47144	41.4115	225.411	93.6876	2.02641	NA
CANTOP PC-22	194.691	1315.07	2.64314	16.0808	29.3597	0.138828	29.5619	0.0161914	3.45157	0.116757	103.541	3.54523	132	36.6075	680.483	640.182	103.541	3.54523	NA
CANTOP PC-95	201.138	12658.8	1.78308	21.3303	9.55086	0.144394	9.87232	0.0223379	2.49877	0.253109	142.415	3.5196	136.95	12.6487	43.1986	228.782	142.415	3.5196	NA
CANTOP PC-39	281.94	20349.6	1.69027	20.7467	5.65425	0.190596	6.26108	0.0286788	2.68896	0.429472	182.274	4.83264	177.137	10.1775	109.133	133.597	182.274	4.83264	NA
CANTOP PC-107	158.534	23301	1.676	19.9501	7.71545	0.200353	8.07925	0.0289894	2.3971	0.296698	184.22	4.35343	185.425	13.6935	200.781	179.36	184.22	4.35343	NA
CANTOP PC-40	248.665	31545.4	1.73931	19.5729	6.31317	0.209919	7.10312	0.0297993	3.25548	0.458317	189.292	6.07277	193.485	12.514	244.936	145.528	189.292	6.07277	NA
CANTOP PC-42	72.3181	4506.84	1.33962	23.5261	26.7718	0.175735	27.307	0.0299852	5.3798	0.197012	190.455	10.0963	164.384	41.4661	-196.443	680.55	190.455	10.0963	NA
CANTOP PC-102	320.743	47273.7	2.38049	20.1176	6.65605	0.207738	7.94138	0.0303104	4.33157	0.545443	192.49	8.21461	191.653	13.8706	181.323	155.251	192.49	8.21461	NA
CANTOP PC-60	161.496	17387.9	3.11565	22.3737	10.3863	0.187727	10.53	0.0304623	1.73391	0.164663	193.441	3.30427	174.688	16.9009	-72.2048	254.386	193.441	3.30427	NA
CANTOP PC-53	298.904	47949	2.4649	19.8606	6.72683	0.213459	8.58009	0.0307472	5.32614	0.620756	195.223	10.242	196.451	15.3266	211.224	156.047	195.223	10.242	NA
CANTOP PC-63	97.4685	11241.2	2.1693	21.7437	8.00919	0.195057	9.17853	0.0307605	4.48312	0.488435	195.306	8.62452	180.935	15.2128	-2.8661	193.422	195.306	8.62452	NA
CANTOP PC-34	132.491	19198.2	1.19479	20.8371	19.314	0.204816	19.4385	0.0309528	2.19611	0.112978	196.509	4.25044	189.193	33.5655	98.8566	460.658	196.509	4.25044	NA
CANTOP PC-62	112.579	13292.1	1.94737	17.729	10.3616	0.241148	10.94	0.0310076	3.51011	0.320851	196.851	6.80528	219.36	21.5861	468.309	229.966	196.851	6.80528	NA
CANTOP PC-28	200.408	22572.8	1.94587	18.9347	9.57705	0.226287	9.97877	0.0310754	2.80283	0.28088	197.275	5.44555	207.129	18.6992	320.797	218.038	197.275	5.44555	NA
CANTOP PC-82	469.151	24390.2	3.00836	19.6922	3.33378	0.218308	3.78002	0.031179	1.78169	0.471345	197.923	3.47279	200.501	6.87769	230.908	77.0019	197.923	3.47279	NA
CANTOP PC-84	280.775	15788.9	2.47924	20.3539	6.5855	0.211235	6.85526	0.0311825	1.90415	0.277766	197.945	3.7119	194.588	12.1398	154.05	154.375	197.945	3.7119	NA
CANTOP PC-94	547.963	43056.4	3.19978	20.2218	3.06903	0.212759	3.27087	0.0312037	1.13121	0.345844	198.078	2.2066	195.865	5.82654	169.274	71.6787	198.078	2.2066	NA
CANTOP PC-16	842.481	87921.9	2.96505	20	2.59758	0.215245	7.33214	0.0312221	6.85659	0.935142	198.192	13.3825	197.944	13.1872	195.01	60.3779	198.192	13.3825	NA
CANTOP PC-15	176.602	10108.4	1.31909	20.7089	9.54229	0.208477	10.0282	0.0313122	3.08388	0.30752	198.756	6.03587	192.274	17.5678	113.426	225.584	198.756	6.03587	NA
CANTOP PC-20	197.823	32282	4.45976	19.0228	11.5093	0.227139	11.8846	0.0313375	2.96298	0.249313	198.914	5.80378	207.834	22.34	310.205	262.759	198.914	5.80378	NA
CANTOP PC-61	140.78	14363.7	2.69679	19.2911	14.0356	0.22492	14.2918	0.031469	2.69382	0.188488	199.736	5.29803	205.996	26.6524	278.268	322.717	199.736	5.29803	NA
CANTOP PC-100	87.5922	9307.4	2.16225	22.009	18.2593	0.197366	18.901	0.0315043	4.88342	0.258368	199.957	9.61483	182.895	31.6447	-32.1931	445.951	199.957	9.61483	NA
CANTOP PC-50	120.141	13166.1	1.88937	21.464	20.1873	0.202474	20.3888	0.0315195	2.859	0.140224	200.051	5.63164	187.218	34.8728	28.2381	488.244	200.051	5.63164	NA
CANTOP PC-65	656.134	42682.5	1.81462	20.0024	2.73574	0.217316	3.15661	0.0315262	1.57478	0.498881	200.093	3.10262	199.673	5.72195	194.738	63.5938	200.093	3.10262	NA
CANTOP PC-24	461.79	39916.1	1.8787	20.3512	3.97969	0.214566	4.45999	0.0316701	2.01335	0.451425	200.992	3.98424	197.377	8.00041	154.363	93.2257	200.992	3.98424	NA
CANTOP PC-37	186.394	56435.8	2.13221	20.0971	10.5467	0.217734	11.1089	0.0317365	3.48934	0.314102	201.407	6.91914	200.022	20.1713	183.699	246.218	201.407	6.91914	NA
CANTOP PC-87	138.906	30787.9	2.09842	21.17	11.8346	0.207288	12.161	0.0318269	2.7986	0.23013	201.972	5.56477	191.275	21.2043	61.2005	282.805	201.972	5.56477	NA
CANTOP PC-79	222.133	15277.1	1.6626	20.6562	14.9025	0.21248	15.0932	0.0318322	2.39126	0.158433	202.005	4.75556	195.632	26.8631	119.458	352.902	202.005	4.75556	NA
CANTOP PC-74	151.915	10118.4	2.1874	19.3329	10.4416	0.227415	11.9539	0.0318871	5.8197	0.486844	202.348	11.5932	208.063	22.4926	273.268	239.826	202.348	11.5932	NA
CANTOP PC-55	115.937	8426.28	2.03546	19.3644	14.7209	0.227668	14.9122	0.0319745	2.38124	0.159684	202.894	4.75616	208.272	28.0869	269.535	339.149	202.894	4.75616	NA
CANTOP PC-98	117.726	10931.9	2.20586	21.7614	12.4831	0.20293	12.657	0.0320281	2.09102	0.165206	203.229	4.18327	187.602	21.6836	-4.83135	302.151	203.229	4.18327	NA
CANTOP PC-106	414.079	97031.7	2.48011	19.9225	5.8534	0.223034	6.18174	0.0322265	1.98787	0.321571	204.468	4.00077	204.432	11.447	203.989	135.94	204.468	4.00077	NA
CANTOP PC-83	176.712	18257.7	1.62455	20.6331	5.53169	0.215724	6.09726	0.0322821	2.56456	0.420608	204.815	5.17004	198.345	10.9862	122.071	130.379	204.815	5.17004	NA
CANTOP PC-5	417.789	23760.3	1.85801	19.6487	2.1806	0.226653	2.40498	0.0322994	1.01436	0.421776	204.923	2.04598	207.432	4.51217	236.044	50.3221	204.923	2.04598	NA
CANTOP PC-97	144.616	11056.5	1.75111	22.362	20.7398	0.199299	20.8917	0.0323232	2.51471	0.120369	205.072	5.07581	184.533	35.266	-70.9286	511.373	205.072	5.07581	NA
CANTOP PC-103	373.595	37711.4	3.33138	20.4944	3.23679	0.21845	3.92333	0.0324703	2.21714	0.565116	205.991	4.4949	200.619	7.14228	137.94	76.0617	205.991	4.4949	NA
CANTOP PC-78	119.23	10318.6	2.4254	21.3741	13.0313	0.210925	13.5252	0.0326975	3.62173	0.267777	207.409	7.39223	194.329	23.9257	38.2784	312.942	207.409	7.39223	NA
CANTOP PC-75	173.032	19265.6	3.57122	22.8075	9.39588	0.20255	9.56319	0.033505	1.781	0.186234	212.447	3.72201	187.282	16.3568	-119.359	232.155	212.447	3.72201	NA
CANTOP PC-64	124.863	21954.4	3.5766	22.846	15.8967	0.202342	16.2768	0.0335271	3.49742	0.214871	212.586	7.31377	187.106	27.8207	-123.519	394.458	212.586	7.31377	NA
CANTOP PC-45	396.352	64169.3	2.03365	19.7937	3.14009	0.239406	3.34676	0.0343685	1.15785	0.345962	217.832	2.48003	217.934	6.56419	219.036	72.6741	217.832	2.48003	NA
CANTOP PC-81	187.128	20288.8	2.7454	19.6121	9.39633	0.24282	10.2181	0.0345389	4.0147	0.392902	218.893	8.64038	220.727	20.2737	240.319	217.037	218.893	8.64038	NA
CANTOP PC-68	107.621	8526.38	4.31832	22.9907	19.6926	0.207922	20.1536	0.0346697	4.28586	0.21266	219.708	9.25774	191.807	35.2385	-139.123	491.516	219.708	9.25774	NA
CANTOP PC-36	25.3608	2282.6	2.26541	14.5912	145.239	0.329489	145.441	0.0348682	7.66075	0.0526726	220.945	16.6393	289.175	383.206	884.751	691.192	220.945	16.6393	NA
CANTOP PC-27	137.609	14052.4	1.56861	20.6121	9.48357	0.242558	9.60477	0.0362606	1.52099	0.158358	229.613	3.43093	220.513	19.04	124.45	223.735	229.613	3.43093	NA
CANTOP PC-54	408.233	56124.3	1.19323	19.5772	3.23728	0.256439	3.85541	0.036411	2.09386	0.543096	230.548	4.74205	231.793	7.9901	244.415	74.6121	230.548	4.74205	NA
CANTOP PC-21	46.977	3792.14	1.57033	19.4092	26.4367	0.363101	27.128	0.0511134	6.08496	0.224306	321.354	19.0749	314.527	73.503	264.268	616.358	321.354	19.0749	NA
CANTOP PC-10	125.474	17636.9	1.70754	18.8643	11.0366	0.374055	11.3729	0.0511771	2.7452	0.24138	321.744	8.61572	322.655	31.4465	329.23	251.064	321.744	8.61572	NA
CANTOP PC-31	106.73	37770.5	1.30702	18.3655	5.40936	0.389238	5.90391	0.0518461	2.36538	0.400647	325.846	7.51595	333.813	16.7976	389.687	121.5	325.846	7.51595	NA
CANTOP PC-104	100.027	14544.3	1.99766	19.4628	13.3247	0.384193	13.5227	0.0542317	2.30578	0.170512	340.45	7.64634	330.118	38.1285	257.895	307.38	340.45	7.64634	NA
CANTOP PC-18	238.748	59321	2.54017	18.637	2.59588	0.409262	3.46356	0.0553192	2.29296	0.662023	347.096	7.74831	348.343	10.2136	356.647	58.6178	347.096	7.74831	NA
CANTOP PC-96	162.594	28497.2	3.15499	19.205	5.79058	0.397354	6.09489	0.0553467	1.90181	0.312034	347.264	6.42958	339.728	17.5999	288.462	132.42	347.264	6.42958	NA
CANTOP PC-88	253.397	20179.5	1.70025	18.7798	3.8646	0.40847	4.2679	0.0556352	1.81103	0.424337	349.026	6.15289	347.773	12.5684	339.431	87.527	349.026	6.15289	NA
CANTOP PC-91	219.729	34883.9	2.13267	18.4732	3.86798	0.417402	4.26672	0.0559235	1.80101	0.422106	350.787	6.14888	354.191	12.7587	376.544	87.0554	350.787	6.14888	NA
CANTOP PC-25	210.367	35270.5	6.38634	19.0343	5.42222	0.409429	5.59237	0.0565216	1.36899	0.244796	354.437	4.72122	348.464	16.4968	308.863	123.546	354.437	4.72122	NA
CANTOP PC-46	427.067	59148.4	1.7077	18.9016	2.86811	0.417324	3.07758	0.0572099	1.11599	0.362619	358.635	3.89303	354.136	9.20142	324.724	65.1129	358.635	3.89303	NA
CANTOP PC-71	263.585	45195.6	1.94743	18.6287	3.09288	0.426416	3.18216	0.0576122	0.74849	0.235214	361.087	2.6284	360.629	9.65945	357.657	69.8105	361.087	2.6284	NA
CANTOP PC-32	410.327	51485.9	1.54684	18.3982	1.93979	0.432293	2.1858	0.0576835	1.00745	0.460907	361.522	3.54192	364.803	6.69874	385.691	43.5657	361.522	3.54192	NA
CANTOP PC-86	81.7295	42691.7	1.76846	18.0189	9.37403	0.532175	9.93811	0.0695476	3.30055	0.33211	433.43	13.8353	433.252	35.0633	432.287	209.282	433.43	13.8353	100.264
CANTOP PC-13	251.223	66402.4	1.59793	17.6281	2.64883	0.546662	2.91113	0.0698915	1.20763	0.414831	435.502	5.08553	442.808	10.4479	480.932	58.5519	435.502	5.08553	90.5538
CANTOP PC-105	240.763	51424.7	1.94525	18.41	5.37773	0.528106	5.51199	0.0705137	1.20917	0.21937	439.25	5.13435	430.552	19.3446	384.252	120.896	439.25	5.13435	114.313
CANTOP PC-72	167.763	47089.9	1.82647	17.6339	5.5279	0.55481	5.93961	0.0709564	2.17287	0.365826	441.915	9.2805	448.143	21.5239	480.211	122.227	441.915	9.2805	92.0253
CANTOP PC-80	97.4664	52162.8	2.84409	17.35	5.21064	0.576168	5.85369	0.0725014	2.66739	0.455677	451.208	11.624	461.996	21.7306	515.969	114.521	451.208	11.624	87.4487
CANTOP PC-23	121.958	37319.7	2.12868	17.6072	3.80911	0.701821	4.22934	0.0896223	1.83794	0.434569	553.303	9.74518	539.878	17.7117	483.597	84.1658	553.303	9.74518	114.414
CANTOP PC-35	83.4102	44523.5	3.05999	13.6844	3.1141	1.68817	3.41469	0.167548	1.40088	0.41025	998.589	12.9594	1004.07	21.7774	1016.04	63.0879	1016.04	63.0879	98.2825
CANTOP PC-19	180.775	97801.9	2.15493	13.5082	1.15982	1.76476	2.96296	0.172895	2.72653	0.920205	1028.04	25.9092	1032.6	19.206	1042.24	23.4233	1042.24	23.4233	98.6381
CANTOP PC-49	36.7939	35158.2	1.1344	13.4395	7.51482	1.85051	7.81869	0.180374	2.15855	0.276076	1069.02	21.2636	1063.61	51.5829	1052.56	151.628	1052.56	151.628	101.564
CANTOP PC-76	247.364	173273	0.837414	13.323	0.843111	1.8691	2.05118	0.180607	1.86989	0.911618	1070.29	18.4401	1070.21	13.5689	1070.08	16.9336	1070.08	16.9336	100.019
CANTOP PC-14	53.7222	42435.1	2.64042	12.9937	1.78315	1.95693	3.21473	0.184419	2.67486	0.832063	1091.07	26.8486	1100.83	21.606	1120.19	35.5489	1120.19	35.5489	97.4005
CANTOP PC-93	116.667	140097	2.53874	12.8288	1.24703	2.07408	2.25038	0.192979	1.87327	0.832422	1137.49	19.5342	1140.28	15.4181	1145.61	24.7611	1145.61	24.7611	99.2916
CANTOP PC-101	112.621	173433	2.21689	11.131	1.13815	3.12098	1.69456	0.251956	1.25545	0.74087	1448.56	16.2875	1437.87	13.0317	1422.09	21.7472	1422.09	21.7472	101.861
CANTOP PC-57	132.362	97037.6	1.22902	9.51296	0.674861	4.49979	1.50812	0.310461	1.3487	0.894291	1742.97	20.5976	1730.93	12.5295	1716.39	12.4076	1716.39	12.4076	101.549
CANTOP PC-66	141.996	174973	1.63312	9.17973	0.997543	4.78876	1.71828	0.318825	1.39907	0.814226	1783.99	21.8034	1782.93	14.4341	1781.68	18.19	1781.68	18.19	100.13
CANTOP PC-26	113.604	67375	1.10526	9.09319	0.547843	4.82448	1.75952	0.318174	1.67206	0.950292	1780.81	26.0174	1789.18	14.7995	1798.93	9.96941	1798.93	9.96941	98.9925
CANTOP PC-58	215.217	186018	0.730937	8.98677	0.436654	5.13534	1.08429	0.334712	0.992476	0.915327	1861.18	16.0444	1841.97	9.21544	1820.32	7.92338	1820.32	7.92338	102.245
CANTOP PC-85	68.7791	85061.7	1.20193	8.98169	1.05488	5.04559	1.55746	0.328677	1.14583	0.735701	1831.96	18.2721	1827.01	13.1991	1821.35	19.1422	1821.35	19.1422	100.583
CANTOP PC-33	91.8106	163476	0.745379	8.97284	0.938583	5.13204	1.14273	0.333978	0.651846	0.570427	1857.64	10.5204	1841.42	9.71121	1823.14	17.0278	1823.14	17.0278	101.892
CANTOP PC-4	49.0356	40426.8	1.22926	8.92573	1.32652	5.02145	1.69051	0.325066	1.04793	0.619893	1814.42	16.5724	1822.95	14.3154	1832.68	24.0371	1832.68	24.0371	99.0037
CANTOP PC-69	69.4724	53901.6	0.777314	8.88713	0.734123	5.21554	1.81828	0.33617	1.6635	0.914871	1868.22	26.9799	1855.16	15.4934	1840.53	13.2916	1840.53	13.2916	101.504
CANTOP PC-38	60.8965	60121.3	0.814378	8.87964	1.43724	5.09691	2.15784	0.328247	1.60954	0.745905	1829.88	25.6416	1835.59	18.3187	1842.06	26.0143	1842.06	26.0143	99.3389
CANTOP PC-56	105.008	84425	1.1797	8.82337	1.02849	5.3298	1.93982	0.34107	1.64473	0.847875	1891.82	26.9654	1873.65	16.5864	1853.56	18.5902	1853.56	18.5902	102.064
CANTOP PC-51	121.991	114985	0.614077	8.67005	0.580468	5.42218	2.26013	0.340953	2.18432	0.966457	1891.25	35.803	1888.37	19.378	1885.18	10.4512	1885.18	10.4512	100.322
CANTOP PC-41	87.8031	85727.3	1.04897	8.57005	0.492119	5.53008	1.02029	0.343727	0.893765	0.875989	1904.57	14.7382	1905.28	8.77361	1906.04	8.84007	1906.04	8.84007	99.9229
CANTOP PC-8	56.676	73973.2	1.05679	8.52582	1.27719	5.53849	1.62108	0.342473	0.998346	0.615851	1898.56	16.418	1906.59	13.9436	1915.33	22.916	1915.33	22.916	99.1243
CANTOP PC-77	120.544	97263.1	0.724698	8.43295	0.795846	5.70377	1.75629	0.348852	1.56562	0.891439	1929.11	26.1026	1931.94	15.174	1934.96	14.2452	1934.96	14.2452	99.698
CANTOP PC-89	74.634	89242.8	1.21099	8.10912	0.781053	6.0782	1.57005	0.357476	1.36198	0.86748	1970.2	23.121	1987.12	13.6905	2004.76	13.8666	2004.76	13.8666	98.2761
CANTOP PC-9	186.489	195750	1.5775	7.74513	0.342573	6.74291	1.02679	0.378769	0.967953	0.942702	2070.53	17.1418	2078.26	9.07955	2085.92	6.02663	2085.92	6.02663	99.2624
CANTOP PC-17	100.002	94132.8	1.25743	7.67124	0.45302	6.92631	1.16285	0.38536	1.07097	0.920993	2101.27	19.2045	2102.03	10.3181	2102.77	7.95442	2102.77	7.95442	99.929
CANTOP PC-3	166.05	385974	1.02437	6.87084	1.0961	8.19205	3.06938	0.408226	2.86699	0.934064	2206.81	53.5776	2252.46	27.7823	2294.19	18.8458	2294.19	18.8458	96.1911
CANTOP PC-73	61.682	82512.9	1.76448	6.745	0.600195	9.0467	2.08731	0.442558	1.99916	0.957767	2362.08	39.5373	2342.74	19.0869	2325.92	10.2861	2325.92	10.2861	101.555
CANTOP PC-29	104.32	521049	0.986933	6.63077	0.377166	9.20254	1.39119	0.442559	1.33909	0.962548	2362.08	26.4831	2358.37	12.7421	2355.14	6.44416	2355.14	6.44416	100.295
CANTOP PC-30	12.2464	20145.1	0.830864	6.46019	2.75794	9.70087	5.26195	0.454522	4.48129	0.851639	2415.32	90.2784	2406.79	48.4728	2399.56	46.9091	2399.56	46.9091	100.657
CANTOP PC-70	140.291	174207	1.66104	6.02835	0.234722	11.167	1.08164	0.48824	1.05586	0.97617	2563.06	22.3299	2537.16	10.0804	2516.51	3.9452	2516.51	3.9452	101.85
CANTOP PC-92	191.618	244592	1.96924	5.73361	0.105054	12.1373	0.878659	0.504717	0.872356	0.992827	2634.04	18.8628	2615.07	8.24282	2600.4	1.75133	2600.4	1.75133	101.293
CANTOP PC-44	240.642	375472	0.990103	5.66647	0.209732	11.9848	0.979306	0.492541	0.956584	0.976798	2581.66	20.3497	2603.22	9.17816	2620.02	3.4897	2620.02	3.4897	98.5357
CANTOP PC-67	93.6477	104178	1.08188	5.49422	0.236163	12.7965	1.33688	0.509915	1.31585	0.984273	2656.27	28.6466	2664.79	12.5912	2671.25	3.91034	2671.25	3.91034	99.439
CANTOP PC-99	59.5866	70200.1	1.47585	5.42859	0.892566	13.1993	2.1754	0.519679	1.98385	0.91195	2697.82	43.7338	2694	20.5358	2691.13	14.7485	2691.13	14.7485	100.249
CANTOP PC-1	263.06	537681	1.50105	5.36215	0.151359	13.229	0.97654	0.514474	0.964739	0.987915	2675.7	21.1267	2696.13	9.21901	2711.46	2.49676	2711.46	2.49676	98.6812
CANTOP PC-7	53.2951	88934.2	1.24387	5.29709	0.519342	13.5886	2.38417	0.522048	2.32692	0.975987	2707.86	51.4506	2721.47	22.5527	2731.58	8.54746	2731.58	8.54746	99.1317
CANTOP PC-59	31.8555	50822.4	1.33434	5.28041	0.814964	14.1552	1.25441	0.542104	0.953611	0.760208	2792.25	21.6103	2760.16	11.8972	2736.76	13.4087	2736.76	13.4087	102.028
CANTOP PC-43	20.7029	26686	2.40366	5.25216	1.28256	14.556	2.89192	0.554473	2.59196	0.896276	2843.75	59.6013	2786.67	27.4832	2745.59	21.0874	2745.59	21.0874	103.575
CANTOP PC-48	50.1144	95036.9	0.398782	5.22588	0.357768	13.9219	1.17978	0.527662	1.12423	0.952911	2731.59	25.0325	2744.41	11.177	2753.83	5.87858	2753.83	5.87858	99.1924
1. Analyses with >10% uncertainty (1-sigma) in 206Pb/238U age are not included.
2. Analyses with >10% uncertainty (1-sigma) in 206Pb/207Pb age are not included, unless 206Pb/238U age is <400 Ma.
3. Best age is determined from 206Pb/238U age for analyses with 206Pb/238U age <900 Ma and from 206Pb/207Pb age for analyses with 206Pb/238Uage >900 Ma.
4. Concordance is based on 206Pb/238U age / 206Pb/207Pb age. Value is not reported for 206Pb/238U ages <400 Ma because of large uncertainty in 206Pb/207Pb age.
5. Analyses with 206Pb/238U age >400 Ma and with >20% discordance (<80% concordance) are not included.
6. Analyses with 206Pb/238U age >400 Ma and with >5% reverse discordance (<105% concordance) are not included.
7. All uncertainties are reported at the 2-sigma level, and include only measurement errors.
8. Analyses conducted by LA-ICPMS, as described by Gehrels et al. (2008) and Gehrels and Pecha (2014).
9. U concentration and U/Th are calibrated relative to FC-1 zircon standard and are accurate to ~20%.
10. Common Pb correction is from measured 204Pb with common Pb composition interpreted from Stacey and Kramers (1975).
11. Common Pb composition assigned uncertainties of 1.5 for 206Pb/204Pb, 0.3 for 207Pb/204Pb, and 2.0 for 208Pb/204Pb.
12. U/Pb and 206Pb/207Pb fractionation is calibrated relative to fragments of large Sri Lanka zircons and individual crystals of FC-1, and R33.
13. U decay constants and composition as follows: 238U = 9.8485 x 10-10, 235U = 1.55125 x 10-10, 238U/235U = 137.82.
14. Weighted mean and concordia plots determined with Isoplot (Ludwig, 2008).

## Sheet: CANT-PC1-COMP
Internal Uncertainty Level	one sigma
External Uncertainty 206/238 (% two sigma)	1.8
External Uncertainty 206/207 (% two sigma)	1.3
							Isotope ratios						Apparent ages (Ma)
Analysis	U	206Pb	U/Th	206Pb*	±	207Pb*	±	206Pb*	±	error	206Pb*	±	207Pb*	±	206Pb*	±	Best age	±	Conc
	(ppm)	204Pb		207Pb*	(%)	235U*	(%)	238U	(%)	corr.	238U*	(Ma)	235U	(Ma)	207Pb*	(Ma)	(Ma)	(Ma)	(%)
CANT-PC1-COMP-1	529.726	28500.2	1.09248	19.088	2.07211	0.415773	6.37991	0.0575594	6.03404	0.945787	360.766	21.1709	353.024	19.0265	302.436	47.2486	360.766	21.1709	NA
CANT-PC1-COMP-2	167.278	7121.16	0.583967	17.6616	10.453	0.585433	11.7064	0.0749904	5.27023	0.4502	466.151	23.7001	467.947	43.9192	476.773	231.659	466.151	23.7001	NA
CANT-PC1-COMP-3	254.004	20069.9	1.41917	19.8256	5.46375	0.373401	6.64733	0.0536909	3.78609	0.569565	337.142	12.4365	322.171	18.3528	215.309	126.604	337.142	12.4365	NA
CANT-PC1-COMP-4	699.539	24529.6	1.45039	19.9525	3.48383	0.223993	9.64822	0.0324139	8.99728	0.932533	205.639	18.2099	205.228	17.9299	200.535	80.9325	205.639	18.2099	NA
CANT-PC1-COMP-5	123.855	11843.8	0.68637	19.8059	15.9065	0.336815	17.4307	0.0483822	7.12833	0.408951	304.582	21.2067	294.756	44.6217	217.593	370.214	304.582	21.2067	NA
CANT-PC1-COMP-6	560.976	76725.7	0.50812	8.5114	0.193115	5.86178	8.71068	0.36185	8.70854	0.999754	1990.94	149.19	1955.59	75.6969	1918.37	3.46386	1918.37	3.46386	103.783
CANT-PC1-COMP-7	772.385	240683	1.49357	12.7101	0.670908	2.08271	6.12497	0.19199	6.08812	0.993983	1132.15	63.2151	1143.13	42.0415	1164.01	13.306	1164.01	13.306	97.2624
CANT-PC1-COMP-8	672.76	74852.6	0.967578	18.5828	2.89443	0.407046	7.19586	0.0548597	6.58808	0.915537	344.288	22.087	346.746	21.1403	363.222	65.2856	344.288	22.087	NA
CANT-PC1-COMP-9	728.955	53187.7	1.0586	20.534	4.57295	0.19193	6.85103	0.0285834	5.10145	0.744625	181.676	9.13873	178.274	11.202	133.4	107.529	181.676	9.13873	NA
CANT-PC1-COMP-11	374.669	150520	2.26228	9.26049	0.383695	4.56401	5.11653	0.306535	5.10212	0.997184	1723.63	77.17	1742.72	42.6402	1765.69	7.01097	1765.69	7.01097	97.6181
CANT-PC1-COMP-12	169.316	6241.26	0.9003	19.9921	26.3023	0.217603	27.4661	0.0315516	7.91036	0.288005	200.252	15.5972	199.912	49.8808	195.932	620.699	200.252	15.5972	NA
CANT-PC1-COMP-13	717.068	112208	3.3151	12.8305	4.61163	0.688271	5.1088	0.0640476	2.19834	0.430304	400.194	8.5301	531.761	21.1509	1145.34	91.6862	400.194	8.5301	34.941
CANT-PC1-COMP-16	237.611	6682.86	1.3899	19.5406	11.2083	0.215158	11.3005	0.0304925	1.44054	0.127476	193.63	2.74785	197.871	20.3193	248.738	258.671	193.63	2.74785	NA
CANT-PC1-COMP-17	583.542	29730.1	1.48071	19.8382	4.4647	0.21845	11.3605	0.0314307	10.4464	0.919538	199.496	20.5211	200.619	20.6839	213.86	103.454	199.496	20.5211	NA
CANT-PC1-COMP-18	58.7913	42277.5	0.414849	8.3136	1.89614	5.81736	4.39992	0.350763	3.97038	0.902377	1938.24	66.4662	1949	38.1407	1960.44	33.8415	1960.44	33.8415	98.8678
CANT-PC1-COMP-19	767.252	29623.9	0.96791	19.9846	2.73765	0.226514	7.54598	0.0328314	7.03186	0.931868	208.245	14.4095	207.317	14.1513	196.779	63.6401	208.245	14.4095	NA
CANT-PC1-COMP-20	298.134	15111.6	2.39427	19.6312	6.06136	0.304573	6.77857	0.0433649	3.03461	0.447677	273.656	8.1306	269.966	16.0704	238.1	139.894	273.656	8.1306	NA
CANT-PC1-COMP-21	592.06	21438.5	1.69131	21.194	3.67648	0.165784	4.20127	0.0254832	2.03326	0.483964	162.217	3.25714	155.753	6.06652	58.5332	87.6701	162.217	3.25714	NA
CANT-PC1-COMP-22	671.242	116353	0.999774	13.5547	2.37393	1.52288	7.40709	0.149712	7.01637	0.94725	899.346	58.8992	939.638	45.4294	1035.3	47.9521	1035.3	47.9521	86.8679
CANT-PC1-COMP-23	127.262	56820.6	2.26606	10.7354	1.50718	3.44461	9.99315	0.268198	9.87883	0.988561	1531.65	134.696	1514.64	78.7969	1490.92	28.532	1490.92	28.532	102.732
CANT-PC1-COMP-24	113.306	134889	3.00156	5.59691	0.624344	11.5971	5.55275	0.470756	5.51754	0.993659	2486.88	113.858	2572.44	51.9512	2640.55	10.3649	2640.55	10.3649	94.1802
CANT-PC1-COMP-25	290.56	17215.9	0.630404	17.7335	4.76784	0.521025	12.891	0.0670119	11.9769	0.929089	418.128	48.4902	425.836	44.8665	467.778	105.643	418.128	48.4902	NA
CANT-PC1-COMP-26	540.918	11882.4	2.23148	20.2446	16.0989	0.0750379	16.5134	0.0110176	3.67658	0.222643	70.6358	2.58281	73.4689	11.7042	166.644	378.239	70.6358	2.58281	NA
CANT-PC1-COMP-28	1035.67	63647.8	1.01607	19.1761	1.3299	0.305728	6.30189	0.04252	6.15996	0.977479	268.434	16.1959	270.864	14.9835	291.922	30.3847	268.434	16.1959	NA
CANT-PC1-COMP-29	112.905	33569.9	1.2106	9.61076	1.82916	4.42467	4.88295	0.308416	4.5274	0.927186	1732.91	68.7979	1716.97	40.4622	1697.57	33.7103	1697.57	33.7103	102.082
CANT-PC1-COMP-30	169.338	4517.12	1.56056	21.9239	29.0693	0.120759	29.6268	0.0192016	5.72032	0.193079	122.608	6.94728	115.76	32.4243	-22.8075	716.762	122.608	6.94728	NA
CANT-PC1-COMP-31	485.417	31954.5	1.74311	19.8386	6.13109	0.208119	8.73253	0.0299448	6.21827	0.712081	190.203	11.6546	191.973	15.2758	213.818	142.123	190.203	11.6546	NA
CANT-PC1-COMP-33	71.4784	23793.4	1.12489	9.97316	2.63674	4.05289	3.79915	0.293154	2.73517	0.719942	1657.27	39.9718	1644.88	30.9511	1629.06	49.0238	1629.06	49.0238	101.732
CANT-PC1-COMP-35	341.65	33196.3	1.26423	16.421	2.17046	0.774531	5.2969	0.092244	4.8318	0.912194	568.795	26.3056	582.359	23.4793	635.636	46.7189	568.795	26.3056	89.4844
CANT-PC1-COMP-36	337.013	17428.2	2.18448	20.3883	14.1316	0.205497	14.5365	0.0303868	3.40692	0.234371	192.969	6.47686	189.767	25.1661	150.125	332.606	192.969	6.47686	NA
CANT-PC1-COMP-37	1439.34	415391	9.09799	13.462	0.308252	1.65308	2.00877	0.1614	1.98498	0.988156	964.55	17.7826	990.73	12.7094	1049.19	6.23309	1049.19	6.23309	91.9333
CANT-PC1-COMP-38	244.072	61557.8	2.9816	12.9267	1.53611	1.83626	2.67383	0.172155	2.18855	0.818506	1023.98	20.721	1058.52	17.5791	1130.47	30.5753	1130.47	30.5753	90.5796
CANT-PC1-COMP-39	174.341	16694.4	3.47287	18.3165	10.4583	0.512331	10.7193	0.0680599	2.35087	0.219312	424.456	9.65702	420.015	36.8885	395.68	235.096	424.456	9.65702	NA
CANT-PC1-COMP-41	253.287	103222	3.0122	12.6992	1.15387	2.07656	2.50253	0.191258	2.22064	0.887358	1128.19	22.9833	1141.1	17.1526	1165.72	22.8613	1165.72	22.8613	96.7807
CANT-PC1-COMP-42	506.864	30173.3	4.71856	18.2418	1.80106	0.498451	2.95767	0.0659459	2.34606	0.793212	411.685	9.35642	410.654	9.99018	404.84	40.3234	411.685	9.35642	NA
CANT-PC1-COMP-43	395.587	37660.5	4.74836	17.4485	3.22989	0.612563	3.50194	0.0775188	1.3533	0.386443	481.295	6.27618	485.175	13.5082	503.55	71.1082	481.295	6.27618	NA
CANT-PC1-COMP-44	227.281	84034.1	6.12433	12.6418	2.12693	2.18172	6.99834	0.200036	6.6673	0.952698	1175.51	71.6474	1175.23	48.7636	1174.72	42.0882	1174.72	42.0882	100.068
CANT-PC1-COMP-45	328.776	7896	2.09899	23.3268	14.1301	0.105908	14.4697	0.0179178	3.11681	0.215402	114.483	3.53671	102.216	14.0711	-175.178	353.773	114.483	3.53671	NA
CANT-PC1-COMP-47	197.863	84079.6	1.87564	9.70001	1.75842	4.24874	2.38442	0.298904	1.6104	0.675385	1685.87	23.8896	1683.49	19.6007	1680.52	32.4748	1680.52	32.4748	100.319
CANT-PC1-COMP-48	271.43	24023.4	1.4418	16.457	14.0373	0.207663	14.4279	0.0247862	3.33461	0.231122	157.834	5.19925	191.59	25.1963	630.922	303.717	157.834	5.19925	NA
CANT-PC1-COMP-49	659.99	97499.1	7.10563	14.5157	2.34857	1.25747	2.6501	0.132383	1.22769	0.463261	801.447	9.2522	826.769	14.9899	895.485	48.4715	801.447	9.2522	89.4986
CANT-PC1-COMP-50	117.232	11981.3	0.838913	20.4776	21.7373	0.333312	22.4021	0.0495025	5.41708	0.241812	311.467	16.4713	292.091	56.9235	139.852	515.668	311.467	16.4713	NA
CANT-PC1-COMP-51	468.513	217991	3.478	9.16654	0.58035	4.61658	2.59988	0.30692	2.53428	0.974768	1725.53	38.3667	1752.27	21.7019	1784.3	10.5782	1784.3	10.5782	96.7064
CANT-PC1-COMP-52	285.222	14937.9	2.37282	20.6806	11.0796	0.207638	12.3173	0.0311435	5.38118	0.436881	197.701	10.4772	191.569	21.507	116.64	261.941	197.701	10.4772	NA
CANT-PC1-COMP-54	219.892	108435	2.67025	12.1547	2.19534	2.3716	3.41379	0.209066	2.61428	0.7658	1223.84	29.1411	1234.08	24.3868	1252.04	42.9513	1252.04	42.9513	97.7475
CANT-PC1-COMP-55	210.37	80075.7	3.98663	10.4224	3.32015	3.4793	5.12321	0.263003	3.90178	0.761589	1505.19	52.3777	1522.53	40.4281	1546.71	62.4033	1546.71	62.4033	97.3152
CANT-PC1-COMP-56	278.815	16520.2	3.11415	21.2264	17.4469	0.193137	17.5863	0.0297332	2.20988	0.125659	188.878	4.11341	179.302	28.9132	54.8508	418.909	188.878	4.11341	NA
CANT-PC1-COMP-57	121.776	54594	2.36749	13.0133	2.04439	2.0736	6.4642	0.195709	6.1324	0.948671	1152.23	64.7066	1140.12	44.3096	1117.18	40.7785	1117.18	40.7785	103.137
CANT-PC1-COMP-58	223.785	70204.8	3.09908	12.4446	1.78512	2.15567	2.603	0.194563	1.89445	0.727797	1146.05	19.8909	1166.88	18.0568	1205.73	35.1457	1205.73	35.1457	95.0503
CANT-PC1-COMP-59	65.9022	13971.7	5.11418	13.7664	5.62812	1.6685	6.15136	0.166588	2.48263	0.403591	993.286	22.8539	996.615	39.0728	1003.93	114.326	1003.93	114.326	98.9401
CANT-PC1-COMP-60	430.38	23580.5	2.59561	20.7567	9.13629	0.200323	9.53961	0.030157	2.74451	0.287697	191.531	5.17926	185.399	16.167	107.956	216.166	191.531	5.17926	NA
CANT-PC1-COMP-61	258.873	48645.2	3.53955	13.681	1.55949	1.65013	1.7334	0.163733	0.756743	0.436565	977.488	6.86355	989.601	10.9597	1016.54	31.6068	1016.54	31.6068	96.1586
CANT-PC1-COMP-62	106.272	4115.99	4.4357	23.118	33.0591	0.174855	34.2111	0.0293175	8.80291	0.257312	186.275	16.163	163.623	51.7446	-152.816	840.313	186.275	16.163	NA
CANT-PC1-COMP-64	192.874	55372.1	2.86453	10.6724	1.02015	3.28687	3.19728	0.254415	3.03016	0.947732	1461.2	39.6179	1477.95	24.8966	1502.05	19.2824	1502.05	19.2824	97.2807
CANT-PC1-COMP-65	289.279	14960.2	1.65904	22.4223	8.96171	0.167552	9.21386	0.0272476	2.14079	0.232345	173.299	3.66055	157.292	13.4267	-77.5166	219.589	173.299	3.66055	NA
CANT-PC1-COMP-66	72.9218	19347	1.86284	13.6823	4.52051	1.57042	5.4815	0.155838	3.1003	0.565594	933.607	26.9465	958.591	34.0176	1016.35	91.6204	1016.35	91.6204	91.8592
CANT-PC1-COMP-67	141.372	34823.6	2.09059	11.6244	1.66953	2.60458	3.35791	0.219588	2.91346	0.86764	1279.7	33.8163	1301.93	24.6415	1338.74	32.2717	1338.74	32.2717	95.5895
CANT-PC1-COMP-68	282.561	8609.14	2.56636	19.1692	11.7172	0.22214	12.2462	0.0308837	3.56045	0.29074	196.076	6.87611	203.689	22.6052	292.74	268.388	196.076	6.87611	NA
CANT-PC1-COMP-69	274.365	12773.2	2.07596	20.8536	11.5484	0.208156	11.973	0.0314825	3.16	0.263928	199.82	6.21745	192.004	20.9488	96.9399	274.088	199.82	6.21745	NA
CANT-PC1-COMP-70	219.112	244518	5.26901	5.43591	0.407659	12.9493	3.10868	0.510525	3.08183	0.991364	2658.87	67.1478	2675.97	29.3103	2688.9	6.73555	2688.9	6.73555	98.8832
CANT-PC1-COMP-71	117.01	3666.37	1.16353	12.5381	9.86485	1.68197	11.2697	0.15295	5.44886	0.483498	917.48	46.5984	1001.73	71.8837	1191	195.187	1191	195.187	77.0345
CANT-PC1-COMP-72	610.684	27104.9	2.71998	20.1885	6.24377	0.18167	7.46111	0.0266003	4.08455	0.547445	169.236	6.82257	169.497	11.6477	173.12	145.832	169.236	6.82257	NA
CANT-PC1-COMP-73	477.041	33589.7	1.15702	18.7515	3.66837	0.362935	3.9565	0.0493587	1.4822	0.374623	310.583	4.49431	314.404	10.6982	342.825	83.0291	310.583	4.49431	NA
CANT-PC1-COMP-74	155.868	8206.18	3.22929	21.2276	22.7964	0.196283	23.9042	0.0302193	7.19275	0.300899	191.921	13.6009	181.977	39.8453	54.7469	549.97	191.921	13.6009	NA
CANT-PC1-COMP-75	496.192	20444.4	2.7639	20.2048	9.14219	0.187912	10.1822	0.0275365	4.48302	0.44028	175.111	7.74461	174.846	16.3561	171.241	213.786	175.111	7.74461	NA
CANT-PC1-COMP76	292.102	17096.2	1.61591	18.083	10.5939	0.218376	13.9656	0.0286401	9.09976	0.651585	182.032	16.3328	200.558	25.4216	424.371	236.929	182.032	16.3328	NA
CANT-PC1-COMP-77	258.222	208241	1.64247	5.39006	0.360805	10.9394	6.29797	0.427648	6.28763	0.998358	2295.11	121.429	2517.99	58.6576	2702.89	5.95657	2702.89	5.95657	84.913
CANT-PC1-COMP-78	734.388	23691.9	2.94925	19.6615	4.66306	0.216096	5.13163	0.030815	2.14231	0.417471	195.647	4.12839	198.656	9.25926	234.552	107.647	195.647	4.12839	NA
CANT-PC1-COMP-80	517.254	48482	1.6644	18.5309	5.66479	0.420824	6.00119	0.0565582	1.98103	0.330106	354.66	6.83615	356.64	18.0498	369.521	127.691	354.66	6.83615	NA
CANT-PC1-COMP-81	119.447	42343	1.69015	8.21309	1.22438	6.0534	1.96056	0.360583	1.53124	0.78102	1984.94	26.1603	1983.56	17.0865	1982.11	21.7943	1982.11	21.7943	100.142
CANT-PC1-COMP-83	206.02	11849.4	0.85839	10.8172	0.959381	3.26146	1.78543	0.255874	1.50578	0.843367	1468.7	19.777	1471.91	13.8757	1476.54	18.1971	1476.54	18.1971	99.469
CANT-PC1-COMP-84	1267.22	26956.8	3.49445	20.2809	3.35487	0.209311	3.84012	0.0307878	1.86852	0.486579	195.477	3.59771	192.974	6.74895	162.474	78.4769	195.477	3.59771	NA
CANT-PC1-COMP-85	93.7824	17687.3	2.80207	13.5927	4.55027	1.80939	5.57331	0.178377	3.21819	0.577429	1058.1	31.4042	1048.86	36.4628	1029.64	92.0476	1029.64	92.0476	102.764
CANT-PC1-COMP-87	27.8196	14285.3	2.01121	4.87603	1.96663	14.6316	4.91226	0.517438	4.50141	0.916362	2688.3	98.9574	2791.59	46.7204	2867.09	31.9848	2867.09	31.9848	93.7643
CANT-PC1-COMP-88	229.509	59058.6	2.04127	14.1515	2.50179	1.5182	2.81064	0.155822	1.2809	0.455734	933.516	11.132	937.75	17.2074	947.69	51.2162	947.69	51.2162	98.5043
CANT-PC1-COMP-89	85.1442	51929.8	0.871855	11.5635	3.95737	2.90556	4.77174	0.243679	2.66623	0.558753	1405.8	33.6767	1383.36	36.0609	1348.89	76.4026	1348.89	76.4026	104.219
CANT-PC1-COMP-90	385.465	104362	3.37585	13.5561	0.709857	1.76724	2.69162	0.173752	2.59633	0.964597	1032.75	24.7761	1033.51	17.4557	1035.1	14.3587	1035.1	14.3587	99.7727
CANT-PC1-COMP-91	309.811	10931.3	4.00652	18.8916	9.283	0.23904	10.1712	0.0327519	4.15672	0.408677	207.749	8.49787	217.634	19.9269	325.943	211.118	207.749	8.49787	NA
CANT-PC1-COMP-92	447.62	40677.2	1.50789	17.8358	1.22289	0.543544	1.7995	0.0703115	1.32013	0.733609	438.032	5.59051	440.759	6.43434	455.037	27.161	438.032	5.59051	NA
CANT-PC1-COMP-93	84.1842	53962	1.21978	9.1246	1.99319	4.99652	3.1097	0.330659	2.38692	0.767575	1841.58	38.2363	1818.73	26.3156	1792.65	36.2989	1792.65	36.2989	102.729
CANT-PC1-COMP-94	449.704	29080.1	1.66849	21.8988	10.8885	0.185099	11.3309	0.0293984	3.1351	0.276686	186.782	5.77178	172.439	17.9717	-20.0407	264.121	186.782	5.77178	NA
CANT-PC1-COMP-96	391.591	52286.2	2.77423	12.0392	0.85662	2.4102	2.18451	0.21045	2.00954	0.919908	1231.21	22.5226	1245.64	15.678	1270.66	16.7163	1270.66	16.7163	96.8958
CANT-PC1-COMP-97	526.196	134349	3.48106	16.6426	1.11863	0.757861	2.93526	0.0914765	2.71375	0.924533	564.263	14.6617	572.775	12.8501	606.679	24.2055	564.263	14.6617	93.0085
CANT-PC1-COMP-98	359.094	15712.6	1.86153	21.4781	13.333	0.190114	14.4546	0.0296149	5.58267	0.386221	188.138	10.3513	176.727	23.4498	26.6411	320.946	188.138	10.3513	NA
CANT-PC1-COMP-99	295.817	6403.06	3.07856	19.5552	15.5193	0.208773	15.6844	0.0296099	2.27035	0.144751	188.106	4.20895	192.523	27.5128	247.04	359.189	188.106	4.20895	NA
CANT-PC1-COMP-100	211.184	29845.2	1.96185	16.5759	2.92138	0.744771	4.84247	0.0895364	3.86199	0.797526	552.795	20.4592	565.186	20.9915	615.353	63.0842	552.795	20.4592	89.8338
1. Analyses with >10% uncertainty (1-sigma) in 206Pb/238U age are not included.
2. Analyses with >10% uncertainty (1-sigma) in 206Pb/207Pb age are not included, unless 206Pb/238U age is <400 Ma.
3. Best age is determined from 206Pb/238U age for analyses with 206Pb/238U age <900 Ma and from 206Pb/207Pb age for analyses with 206Pb/238Uage >900 Ma.
4. Concordance is based on 206Pb/238U age / 206Pb/207Pb age. Value is not reported for 206Pb/238U ages <400 Ma because of large uncertainty in 206Pb/207Pb age.
5. Analyses with 206Pb/238U age >400 Ma and with >20% discordance (<80% concordance) are not included.
6. Analyses with 206Pb/238U age >400 Ma and with >5% reverse discordance (<105% concordance) are not included.
7. All uncertainties are reported at the 2-sigma level, and include only measurement errors.
8. Analyses conducted by LA-ICPMS, as described by Gehrels et al. (2008) and Gehrels and Pecha (2014).
9. U concentration and U/Th are calibrated relative to FC-1 zircon standard and are accurate to ~20%.
10. Common Pb correction is from measured 204Pb with common Pb composition interpreted from Stacey and Kramers (1975).
11. Common Pb composition assigned uncertainties of 1.5 for 206Pb/204Pb, 0.3 for 207Pb/204Pb, and 2.0 for 208Pb/204Pb.
12. U/Pb and 206Pb/207Pb fractionation is calibrated relative to fragments of large Sri Lanka zircons and individual crystals of FC-1, and R33.
13. U decay constants and composition as follows: 238U = 9.8485 x 10-10, 235U = 1.55125 x 10-10, 238U/235U = 137.82.
14. Weighted mean and concordia plots determined with Isoplot (Ludwig, 2008).

## Sheet: 070618BK-01
Internal Uncertainty Level	one sigma
External Uncertainty 206/238 (% two sigma)	0.7
External Uncertainty 206/207 (% two sigma)	0.5
							Isotope ratios						Apparent ages (Ma)
Analysis	U	206Pb	U/Th	206Pb*	±	207Pb*	±	206Pb*	±	error	206Pb*	±	207Pb*	±	206Pb*	±	Best age	±	Conc
	(ppm)	204Pb		207Pb*	(%)	235U*	(%)	238U	(%)	corr.	238U*	(Ma)	235U	(Ma)	207Pb*	(Ma)	(Ma)	(Ma)	(%)
-Spot 130	254.699	3120.53	2.4999	23.5072	3.1831	0.06476	3.35628	0.0110458	1.06417	0.317069	70.8152	0.749472	63.7147	2.07273	NA	NA	70.8152	0.749472	111.144
-Spot 253	307.437	3605.89	2.5884	21.6108	4.76186	0.070488	4.91446	0.0110529	1.21516	0.247262	70.8604	0.85635	69.1625	3.28579	10.8503	114.6	70.8604	0.85635	102.455
-Spot 92	409.038	9610.46	14.6907	20.4447	1.49724	0.102871	1.87845	0.0152603	1.13439	0.603898	97.6312	1.09918	99.4234	1.7791	142.623	35.1175	97.6312	1.09918	98.1974
-Spot 122	519.784	120057	4.87384	20.6788	1.31795	0.102849	1.89689	0.0154316	1.36426	0.719209	98.7187	1.33652	99.4024	1.7962	115.84	31.0774	98.7187	1.33652	99.3121
-Spot 293	456.408	4907.37	4.11712	20.4085	2.962	0.107871	3.40233	0.0159736	1.67405	0.49203	102.159	1.69671	104.016	3.36374	146.795	69.4861	102.159	1.69671	98.2145
-Spot 206	396.89	19829.2	1.88123	20.8196	1.12962	0.110337	1.56644	0.016668	1.08522	0.69279	106.563	1.14693	106.274	1.58056	99.7801	26.7429	106.563	1.14693	100.272
-Spot 133	347.121	24252.3	1.66811	20.5516	1.92044	0.113427	2.20352	0.0169142	1.08047	0.490338	108.124	1.1585	109.096	2.27931	130.36	45.1527	108.124	1.1585	99.1093
-Spot 173	213.362	28210.7	1.96779	20.834	1.7028	0.112636	2.08888	0.017027	1.20991	0.579216	108.839	1.3058	108.374	2.14718	98.1388	40.3079	108.839	1.3058	100.429
-Spot 289	1164.98	31045.1	1.96347	20.7691	0.883362	0.11793	1.81529	0.0177718	1.58586	0.873612	113.558	1.7851	113.194	1.9444	105.515	20.8979	113.558	1.7851	100.322
-Spot 165	387.499	15026.7	1.0581	20.5882	1.42108	0.123925	1.70839	0.0185125	0.948233	0.555044	118.248	1.11104	118.624	1.91267	126.199	33.4595	118.248	1.11104	99.6829
-Spot 223	388.822	21698.4	2.11698	20.4681	1.23842	0.128991	1.67561	0.019157	1.1287	0.673607	122.326	1.36767	123.191	1.94389	139.921	29.0798	122.326	1.36767	99.2977
-Spot 194	464.563	34448.3	2.24976	20.7904	1.13999	0.167914	1.9573	0.0253301	1.59105	0.812881	161.255	2.53382	157.607	2.85736	103.101	26.961	161.255	2.53382	102.314
-Spot 121	197.409	5271.64	3.01139	21.2294	1.13966	0.174396	1.57911	0.0268635	1.09305	0.692194	170.888	1.84335	163.227	2.38102	53.5072	27.1858	170.888	1.84335	104.694
-Spot 157	137.561	9010.27	3.06077	20.5453	1.68255	0.181379	2.23373	0.0270388	1.46921	0.657738	171.989	2.49346	169.247	3.48225	131.075	39.5553	171.989	2.49346	101.62
-Spot 163	694.147	21083.9	2.29139	20.6991	1.13315	0.1816	2.10561	0.0272744	1.77471	0.842845	173.467	3.03748	169.436	3.28591	113.499	26.7152	173.467	3.03748	102.379
-Spot 102	612.614	50701.6	6.40389	20.414	1.16618	0.185896	1.89813	0.027535	1.49763	0.789005	175.102	2.58709	173.122	3.0212	146.168	27.3519	175.102	2.58709	101.144
-Spot 204	253.633	22050.3	2.67994	20.1403	1.2212	0.195342	1.66968	0.0285463	1.13864	0.681951	181.444	2.03719	181.177	2.77056	177.68	28.4819	181.444	2.03719	100.147
-Spot 161	519.802	63168.3	2.13686	19.9511	1.04808	0.197416	1.92419	0.0285784	1.6137	0.838638	181.645	2.89029	182.937	3.22119	199.668	24.3412	181.645	2.89029	99.2934
-Spot 164	284.782	21150	2.09374	20.4169	1.1404	0.193954	1.64032	0.0287326	1.17905	0.718791	182.611	2.12287	179.997	2.70565	145.83	26.7261	182.611	2.12287	101.452
-Spot 141	573.774	71735.4	1.854	20.3334	1.06684	0.194813	1.74731	0.0287419	1.38381	0.791969	182.669	2.49233	180.728	2.8928	155.4	24.9655	182.669	2.49233	101.075
-Spot 158	439.201	37769.7	2.59171	20.1324	1.10296	0.19684	1.82111	0.028754	1.44912	0.795731	182.745	2.611	182.449	3.0412	178.595	25.723	182.745	2.611	100.162
-Spot 175	281.741	14046.7	2.28632	20.0617	1.54582	0.197876	1.91989	0.0288037	1.13861	0.59306	183.057	2.05499	183.328	3.22026	186.794	35.9812	183.057	2.05499	99.8524
-Spot 226	540.047	1.01252e+07	2.50364	19.7697	0.833584	0.201736	1.71063	0.0289382	1.49378	0.873236	183.899	2.70824	186.594	2.91582	220.816	19.292	183.899	2.70824	98.5559
-Spot 106	172.193	9497.56	4.57405	20.8196	2.252	0.192366	2.4341	0.0290595	0.923763	0.379509	184.659	1.68162	178.646	3.9874	99.7818	53.266	184.659	1.68162	103.366
-Spot 105	637.358	29261.4	2.90501	19.9871	0.842988	0.200985	1.72107	0.0291475	1.50048	0.871832	185.21	2.73951	185.959	2.92453	195.505	19.6115	185.21	2.73951	99.5972
-Spot 144	357.597	10797.2	2.76416	20.6278	1.09023	0.195738	1.69271	0.0292965	1.29486	0.764965	186.144	2.37584	181.514	2.81354	121.632	25.6754	186.144	2.37584	102.551
-Spot 281	692.449	57863.4	2.06245	20.1198	0.854373	0.200796	1.89706	0.0293135	1.69378	0.892843	186.25	3.10953	185.8	3.22106	180.056	19.9145	186.25	3.10953	100.242
-Spot 84	465.553	70183	2.96731	19.9824	1.04345	0.202252	1.78551	0.0293243	1.44888	0.811465	186.318	2.66089	187.03	3.04994	196.056	24.2705	186.318	2.66089	99.6192
-Spot 256	727.665	49739.3	3.05305	19.8364	0.787784	0.204345	1.48187	0.0294112	1.25512	0.846986	186.862	2.31168	188.796	2.55301	213.071	18.2288	186.862	2.31168	98.9758
-Spot 244	255.044	66635.5	3.01366	19.7001	1.12343	0.207176	1.56603	0.0296139	1.09103	0.696688	188.131	2.02291	191.18	2.72897	228.969	25.9431	188.131	2.02291	98.4054
-Spot 167	304.281	21836.7	2.47889	20.0241	1.2564	0.20433	1.84265	0.0296873	1.3479	0.731501	188.591	2.5052	188.783	3.1744	191.209	29.2124	188.591	2.5052	99.8982
-Spot 191	478.424	34898.2	2.03026	20.2484	0.923783	0.204285	1.75663	0.0300134	1.49411	0.850556	190.632	2.80655	188.746	3.02565	165.188	21.5678	190.632	2.80655	100.999
-Spot 174	256.322	82241.8	2.50973	18.9543	0.958529	0.218679	1.42442	0.0300748	1.05366	0.739711	191.016	1.98314	200.81	2.5953	317.412	21.8134	191.016	1.98314	95.1231
-Spot 97	700.011	4.82823e+06	2.96089	19.9338	0.89165	0.208231	1.85049	0.0301179	1.62151	0.876257	191.286	3.05615	192.067	3.23828	201.677	20.7079	191.286	3.05615	99.5933
-Spot 236	177.025	10411.4	3.03659	19.6554	1.219	0.214316	1.70939	0.030565	1.19836	0.701043	194.083	2.29115	197.168	3.06335	234.262	28.1443	194.083	2.29115	98.4355
-Spot 291	183.001	8968.74	2.75315	20.9148	1.32068	0.202778	1.63608	0.0307725	0.9657	0.590251	195.381	1.85849	187.474	2.80074	89.0168	31.315	195.381	1.85849	104.218
-Spot 140	572.281	235356	12.802	19.9937	1.02117	0.212385	2.03588	0.0308109	1.76125	0.865107	195.621	3.39364	195.552	3.62132	194.741	23.7424	195.621	3.39364	100.035
-Spot 128	589.584	30847.7	3.1328	19.7485	1.0181	0.215547	1.72732	0.0308862	1.39539	0.807836	196.093	2.69507	198.197	3.11011	223.314	23.547	196.093	2.69507	98.9382
-Spot 182	570.989	61700.6	3.46081	19.7878	1.02316	0.216012	1.75316	0.0310143	1.42362	0.812032	196.894	2.76064	198.585	3.16222	218.729	23.6577	196.894	2.76064	99.1481
-Spot 96	585.205	74024.9	3.26575	20.1111	1.03899	0.212694	1.78013	0.0310369	1.44547	0.812001	197.035	2.80499	195.811	3.17021	181.069	24.2197	197.035	2.80499	100.625
-Spot 262	315.478	19449.2	2.06571	19.6395	1.31178	0.218505	1.87767	0.0311373	1.34346	0.715492	197.663	2.61522	200.665	3.4189	236.098	30.2651	197.663	2.61522	98.5037
-Spot 222	191.793	8419.63	11.6694	20.1595	1.4286	0.214149	1.99945	0.0313246	1.39889	0.699638	198.833	2.739	197.029	3.58086	175.458	33.3277	198.833	2.739	100.916
-Spot 279	228.161	9868.77	5.46117	20.7682	1.36862	0.207936	1.74615	0.0313341	1.0844	0.621023	198.893	2.12386	191.819	3.05211	105.616	32.3188	198.893	2.12386	103.688
-Spot 230	272.863	31759	4.21426	19.8564	1.18121	0.217824	1.46093	0.0313829	0.859685	0.588451	199.197	1.68628	200.097	2.65326	210.723	27.3937	199.197	1.68628	99.5505
-Spot 210	165.123	23378.7	3.41304	19.5204	1.38589	0.222219	1.77447	0.0314744	1.10817	0.624509	199.77	2.17984	203.755	3.27592	250.103	31.9048	199.77	2.17984	98.0439
-Spot 108	408.551	37452.5	3.23031	20.0388	0.852588	0.21676	1.9249	0.0315165	1.72578	0.896558	200.032	3.39911	199.209	3.48187	189.452	19.8448	200.032	3.39911	100.413
-Spot 255	110.444	60545.1	3.02928	19.2062	1.31619	0.227319	1.58407	0.0316785	0.881425	0.556431	201.045	1.74471	207.983	2.97909	287.343	30.0809	201.045	1.74471	96.6641
-Spot 168	355.204	18686	3.09004	20.3894	1.13442	0.215112	1.89164	0.0318241	1.51373	0.800222	201.955	3.00966	197.833	3.4003	148.991	26.5932	201.955	3.00966	102.083
-Spot 278	409.08	16437.9	3.96529	19.6001	1.06875	0.22434	1.43747	0.0319046	0.961302	0.668746	202.457	1.91598	205.516	2.67445	240.718	24.6485	202.457	1.91598	98.5119
-Spot 83	282.313	49041.7	2.77194	20.0477	1.29908	0.220826	1.84168	0.0321221	1.30544	0.70883	203.816	2.61907	202.597	3.38253	188.415	30.2275	203.816	2.61907	100.602
-Spot 132	169.075	23237.1	3.27784	19.6601	1.57696	0.225979	1.84991	0.032236	0.967149	0.522808	204.528	1.94704	206.874	3.46233	233.713	36.3849	204.528	1.94704	98.8658
-Spot 148	233.667	36267.3	3.17074	19.6365	1.30783	0.228065	1.7221	0.0324946	1.12035	0.650573	206.142	2.27297	208.6	3.24732	236.468	30.1665	206.142	2.27297	98.8218
-Spot 154	114.283	14190.3	2.0727	20.3419	1.52026	0.22064	1.89503	0.0325659	1.13134	0.597004	206.587	2.30015	202.442	3.47811	154.457	35.6023	206.587	2.30015	102.048
-Spot 151	493.037	22200.4	2.69502	20.093	0.943867	0.223375	1.79681	0.0325662	1.52893	0.850916	206.589	3.10854	204.715	3.33126	183.164	21.984	206.589	3.10854	100.916
-Spot 237	805.425	37232.4	6.7771	19.7108	0.904138	0.229488	1.72664	0.0328209	1.471	0.85194	208.179	3.0134	209.776	3.27243	227.76	20.8807	208.179	3.0134	99.239
-Spot 166	681.171	28681.7	3.10317	19.9132	0.883174	0.230526	1.78669	0.0333079	1.55315	0.869288	211.218	3.22738	210.632	3.39868	204.064	20.509	211.218	3.22738	100.278
-Spot 98	239.311	23022.1	6.54811	19.7065	1.10218	0.238495	1.44524	0.0341018	0.934832	0.646837	216.169	1.98731	217.187	2.82588	228.246	25.4666	216.169	1.98731	99.5311
-Spot 219	243.049	22199.5	2.86591	19.8716	1.14575	0.236783	1.47639	0.0341405	0.931107	0.630666	216.41	1.98157	215.783	2.87004	208.92	26.5862	216.41	1.98157	100.291
-Spot 235	792.984	65280.1	2.73934	19.8575	0.682043	0.238319	1.78366	0.0343377	1.64811	0.924004	217.639	3.52706	217.043	3.48554	210.598	15.8007	217.639	3.52706	100.275
-Spot 286	280.501	18604.9	2.61739	19.0513	1.37565	0.250606	1.68119	0.0346421	0.966417	0.574842	219.536	2.08592	227.068	3.42072	305.79	31.3425	219.536	2.08592	96.683
-Spot 138	332.291	53347.9	1.55325	19.5882	0.878664	0.25495	1.29322	0.0362358	0.948882	0.733734	229.458	2.13899	230.589	2.66768	242.117	20.2435	229.458	2.13899	99.5094
-Spot 94	1262.56	135958	1.21003	19.5006	0.928021	0.256936	1.69883	0.0363546	1.42296	0.83761	230.198	3.21782	232.195	3.5261	252.483	21.3469	230.198	3.21782	99.1398
-Spot 276	321.676	35945.2	1.3303	19.1441	1.08073	0.289085	1.56268	0.0401559	1.12872	0.722296	253.799	2.80902	257.839	3.55833	294.753	24.693	253.799	2.80902	98.4332
-Spot 261	171.054	6835.82	2.3315	19.6658	1.74055	0.28826	2.82033	0.0411323	2.21918	0.78685	259.848	5.65181	257.189	6.40791	233.042	40.1584	259.848	5.65181	101.034
-Spot 139	329.925	25298.4	3.28613	19.3971	1.10989	0.298017	1.56731	0.0419436	1.10663	0.706066	264.869	2.87171	264.85	3.65383	264.698	25.4647	264.869	2.87171	100.007
-Spot 129	394.944	52848.8	2.20886	18.8077	1.07159	0.341863	1.4712	0.0466526	1.00803	0.685176	293.938	2.89645	298.582	3.80581	335.067	24.2747	293.938	2.89645	98.4444
-Spot 198	600.629	50073.9	4.18826	19.1281	0.956364	0.364977	1.69505	0.0506553	1.39948	0.82563	318.544	4.34961	315.924	4.60209	296.644	21.8248	318.544	4.34961	100.829
-Spot 203	1801.71	60172.2	1.37597	19.0564	0.736754	0.371291	1.35455	0.0513385	1.13666	0.839143	322.734	3.57807	320.61	3.72401	305.213	16.7905	322.734	3.57807	100.663
-Spot 211	103.533	15700.7	3.42575	19.0158	1.09981	0.393799	1.60807	0.0543346	1.17316	0.729544	341.079	3.89737	337.141	4.6133	310.045	25.0553	341.079	3.89737	101.168
-Spot 91	321.257	28080.3	3.5982	18.7023	0.894	0.405886	1.53766	0.055079	1.25107	0.813617	345.629	4.21018	345.908	4.50762	347.761	20.212	345.629	4.21018	99.9193
-Spot 240	354.21	21490	1.98795	18.9561	0.92063	0.405261	1.47053	0.0557406	1.14669	0.779781	349.67	3.90283	345.456	4.30611	317.196	20.9097	349.67	3.90283	101.22
-Spot 199	247.772	16725.4	2.74126	18.7236	0.792293	0.414178	1.14194	0.0562683	0.822381	0.720158	352.891	2.82411	351.879	3.39594	345.208	17.9029	352.891	2.82411	100.288
-Spot 241	512.671	70842.7	1.29964	18.1036	0.908852	0.429195	1.87742	0.0563776	1.64277	0.875014	353.558	5.65173	362.605	5.72477	420.864	20.2896	353.558	5.65173	97.5051
-Spot 259	503.438	7.02206e+06	2.85298	18.5799	0.802309	0.424045	1.48942	0.0571666	1.25486	0.842516	358.371	4.37434	358.939	4.50338	362.592	18.0739	358.371	4.37434	99.8417
-Spot 126	432.463	1.25575e+06	3.25299	18.6456	1.06577	0.425716	1.51268	0.0575948	1.07346	0.709644	360.982	3.76851	360.13	4.58635	354.654	24.0506	360.982	3.76851	100.236
-Spot 88	67.2114	8876.61	57.0574	18.8475	1.61988	0.422536	1.95938	0.0577838	1.10234	0.562596	362.133	3.88188	357.863	5.90953	330.285	36.7243	362.133	3.88188	101.193
-Spot 134	395.91	207451	1.67154	18.7193	0.810329	0.426551	1.46166	0.057936	1.21648	0.832258	363.061	4.29451	360.725	4.43776	345.703	18.3178	363.061	4.29451	100.648
-Spot 263	189.189	11720.3	3.75063	18.7876	1.30216	0.430783	1.67541	0.0587245	1.05422	0.629231	367.864	3.76951	363.733	5.12199	337.455	29.4787	367.864	3.76951	101.136
-Spot 93	819.446	49521.8	18.0633	18.4854	0.764165	0.439914	1.57186	0.0590044	1.3736	0.873873	369.568	4.93363	370.192	4.87615	374.076	17.1998	369.568	4.93363	99.8315
-Spot 100	290.495	152727	2.21172	18.5787	0.851672	0.452377	1.24774	0.0609824	0.911871	0.730818	381.597	3.37869	378.943	3.94618	362.729	19.1971	381.597	3.37869	100.701
-Spot 131	186.3	67662.4	3.19184	18.4601	1.14052	0.466249	1.4231	0.0624511	0.851136	0.598086	390.515	3.22514	388.595	4.59492	377.161	25.6435	390.515	3.22514	100.494
-Spot 189	257.539	26132.6	1.89822	18.3209	0.964356	0.478989	1.37893	0.0636739	0.985628	0.714778	397.93	3.80351	397.379	4.53456	394.157	21.6304	397.93	3.80351	100.138
-Spot 258	411.96	53109.7	3.08078	18.2903	0.902199	0.491885	1.66729	0.0652787	1.4021	0.840947	407.648	5.53866	406.194	5.58178	397.913	20.2227	407.648	5.53866	102.446
-Spot 229	982.562	54791.8	2.07787	18.2855	0.752924	0.494613	1.55897	0.0656237	1.3651	0.875642	409.736	5.41926	408.049	5.23853	398.495	16.8752	409.736	5.41926	102.821
-Spot 246	542.652	26346.2	17.4867	18.5086	0.838597	0.501797	1.50159	0.0673891	1.2456	0.829522	420.406	5.06948	412.918	5.09449	371.252	18.8635	420.406	5.06948	113.24
-Spot 214	644.455	73532	1.09408	18.0925	0.49628	0.52743	1.24386	0.069239	1.14056	0.916957	431.569	4.76117	430.103	4.3612	422.23	11.0768	431.569	4.76117	102.212
-Spot 193	114.875	24687.2	1.3946	18.057	1.31156	0.548655	1.75506	0.0718839	1.16621	0.664485	447.495	5.04173	444.115	6.31353	426.617	29.2622	447.495	5.04173	104.894
-Spot 202	91.2565	8456.25	1.44844	17.9621	1.31524	0.564463	1.75567	0.0735664	1.16297	0.662412	457.606	5.13735	454.427	6.43203	438.357	29.2735	457.606	5.13735	104.391
-Spot 117	354.256	68883.4	11.0706	17.7216	0.829893	0.580684	1.34727	0.0746671	1.06133	0.787762	464.213	4.75362	464.901	5.02555	468.279	18.3924	464.213	4.75362	99.1315
-Spot 209	374.712	68767.2	3.50073	17.6793	0.717762	0.58265	1.43181	0.0747413	1.23891	0.865275	464.657	5.55411	466.163	5.35232	473.608	15.8841	464.657	5.55411	98.1102
-Spot 86	505.92	104809	10.5436	16.4	1.35878	0.730539	2.19209	0.0869312	1.72017	0.784717	537.362	8.86878	556.87	9.39643	637.454	29.2454	537.362	8.86878	84.2982
-Spot 287	263.113	258684	4.31418	17.5134	0.817968	0.692351	1.1943	0.0879802	0.870224	0.728645	543.58	4.53642	534.212	4.96117	494.426	18.0297	543.58	4.53642	109.942
-Spot 274	331.589	18283.2	1.31634	17.0537	0.777692	0.732823	1.20253	0.0906786	0.917205	0.762731	559.549	4.91578	558.209	5.16384	552.743	16.9723	559.549	4.91578	101.231
-Spot 252	162.099	11819.3	1.91549	17.1436	0.999271	0.730354	1.30809	0.0908495	0.844131	0.645316	560.559	4.53196	556.761	5.60622	541.254	21.8514	560.559	4.53196	103.567
-Spot 251	213.819	23067	3.22259	16.9297	0.923051	0.739745	1.53773	0.0908697	1.22987	0.799798	560.679	6.60427	562.257	6.63915	568.669	20.0905	560.679	6.60427	98.5949
-Spot 272	289.644	68244.7	1.08832	17.0447	0.837701	0.74015	1.24173	0.0915368	0.916593	0.73816	564.619	4.9551	562.493	5.36282	553.884	18.2622	564.619	4.9551	101.938
-Spot 176	218.272	70001	3.7325	17.0221	0.88894	0.747471	1.40152	0.0923199	1.08353	0.773113	569.243	5.90346	566.756	6.08723	556.77	19.3884	569.243	5.90346	102.24
-Spot 213	129.276	15856.2	2.87041	16.7433	1.19935	0.789251	1.57641	0.0958837	1.02306	0.648977	590.241	5.77029	590.747	7.06074	592.714	25.979	590.241	5.77029	99.5827
-Spot 103	295.348	35313.3	2.46823	16.7856	1.01732	0.807456	1.51584	0.0983429	1.12376	0.741343	604.69	6.48629	601.026	6.87609	587.247	22.0537	604.69	6.48629	102.97
-Spot 115	199.071	18331.2	1.27494	16.7339	1.05348	0.819769	1.45783	0.0995353	1.00769	0.691228	611.685	5.88051	607.92	6.66836	593.889	22.8207	611.685	5.88051	102.996
-Spot 127	379.951	118821	3.26489	16.8726	0.779641	0.81582	1.28946	0.0998766	1.02706	0.796509	613.686	6.01223	605.714	5.88252	576.02	16.9595	613.686	6.01223	106.539
-Spot 155	199.847	32924.1	1.70721	16.7155	0.980926	0.828701	1.37884	0.100509	0.969012	0.702773	617.391	5.70504	612.891	6.3446	596.318	21.2514	617.391	5.70504	103.534
-Spot 208	124.993	17906.4	1.28927	16.7717	0.908269	0.832732	1.52261	0.101338	1.22204	0.802596	622.244	7.24859	615.127	7.02474	589.035	19.6804	622.244	7.24859	105.638
-Spot 277	503.592	267898	7.59433	16.6693	0.760375	0.842386	1.66034	0.101886	1.476	0.888972	625.453	8.79797	620.461	7.70844	602.276	16.4426	625.453	8.79797	103.848
-Spot 142	123.745	18010	4.18607	16.7349	1.03488	0.84022	1.4321	0.102024	0.98992	0.691236	626.262	5.90787	619.267	6.63947	593.798	22.4214	626.262	5.90787	105.467
-Spot 188	101.438	10452.4	1.31781	16.8488	0.876626	0.836992	1.39275	0.102324	1.08225	0.777063	628.014	6.47611	617.484	6.4435	579.049	19.0484	628.014	6.47611	108.456
-Spot 282	414.453	100836	1.58695	16.6265	0.584141	0.853256	0.976592	0.102936	0.782631	0.80139	631.594	4.70862	626.435	4.56552	607.83	12.6237	631.594	4.70862	103.91
-Spot 201	463.744	181673	2.65762	16.139	1.12962	0.915484	2.10519	0.107205	1.77645	0.843843	656.496	11.0881	659.969	10.2166	671.859	24.1757	656.496	11.0881	97.7133
-Spot 205	130.846	44077.3	4.62154	14.0293	1.06842	1.64511	1.55655	0.167463	1.13195	0.727222	998.118	10.467	987.674	9.83005	964.557	21.8355	964.557	21.8355	103.479
-Spot 228	89.0512	89120.9	1.20808	14.0225	1.17681	1.41149	1.54917	0.143613	1.0075	0.650344	865.059	8.15597	893.787	9.20735	965.513	24.0265	965.513	24.0265	89.5958
-Spot 254	790.55	943197	16.1425	13.7976	0.90597	1.55389	1.79347	0.155566	1.54782	0.863032	932.086	13.4325	952.042	11.0805	998.438	18.3845	998.438	18.3845	93.3544
-Spot 218	93.5528	298581	1.34565	13.6623	0.919235	1.75839	1.31829	0.174312	0.944934	0.716787	1035.83	9.04198	1030.26	8.53319	1018.43	18.6161	1018.43	18.6161	101.708
-Spot 150	90.8397	22015.6	2.54475	13.6509	1.16681	1.81777	1.54613	0.180048	1.01443	0.656112	1067.24	9.9777	1051.88	10.128	1020.12	23.6443	1020.12	23.6443	104.618
-Spot 118	68.551	61402.9	16.4994	13.6059	0.842541	1.82335	1.24201	0.180006	0.912534	0.734722	1067.01	8.97366	1053.89	8.14461	1026.8	17.0612	1026.8	17.0612	103.916
-Spot 124	336.138	344889	3.9018	13.5823	0.739655	1.73445	1.01914	0.170931	0.701113	0.687945	1017.24	6.59776	1021.4	6.5639	1030.32	14.971	1030.32	14.971	98.7304
-Spot 114	98.6738	10818.3	2.22779	13.549	0.867606	1.76357	1.26024	0.173375	0.914033	0.725287	1030.68	8.70624	1032.16	8.16608	1035.28	17.5447	1035.28	17.5447	99.5558
-Spot 215	57.8046	49812.4	1.95058	13.5217	0.956172	1.87964	1.27654	0.184415	0.845745	0.66253	1091.05	8.48887	1073.94	8.46078	1039.34	19.3221	1039.34	19.3221	104.975
-Spot 250	22.4103	4874.51	2.04977	13.4334	1.75954	1.74595	2.36233	0.170178	1.57627	0.667251	1013.09	14.7775	1025.67	15.2526	1052.6	35.4537	1052.6	35.4537	96.2465
-Spot 233	136.701	31472.5	1.38618	13.4248	0.753134	1.78644	1.33462	0.174014	1.10182	0.825566	1034.19	10.5278	1040.53	8.68834	1053.88	15.1892	1053.88	15.1892	98.1314
-Spot 135	230.259	83018.6	1.98295	13.37	0.802723	1.86951	1.2932	0.181363	1.0139	0.784027	1074.42	10.0341	1070.36	8.55511	1062.12	16.1504	1062.12	16.1504	101.158
-Spot 271	250.975	2.47435e+06	4.00569	13.3086	0.965282	1.83142	1.54474	0.176852	1.20601	0.780719	1049.75	11.6831	1056.79	10.1458	1071.38	19.3746	1071.38	19.3746	97.9817
-Spot 104	128.228	76922.9	1.59629	13.3063	0.768702	1.88341	1.37559	0.18184	1.14077	0.829292	1077.02	11.3148	1075.27	9.12368	1071.73	15.4352	1071.73	15.4352	100.493
-Spot 285	332.926	80170.3	3.00454	13.1254	0.940099	1.83589	1.45342	0.174842	1.10844	0.762644	1038.73	10.634	1058.39	9.55412	1099.14	18.823	1099.14	18.823	94.5044
-Spot 186	137.704	142611	2.42313	13.0662	0.864983	1.95631	1.29865	0.185471	0.968658	0.745895	1096.79	9.76954	1100.62	8.72611	1108.16	17.3012	1108.16	17.3012	98.9743
-Spot 292	213.292	69129.8	4.34643	13.0517	0.757162	2.05267	1.14603	0.19439	0.860287	0.750666	1145.11	9.02589	1133.19	7.82482	1110.39	15.1305	1110.39	15.1305	103.127
-Spot 280	56.6666	10455.8	1.65433	13.0307	1.31287	1.95514	1.59556	0.184856	0.906755	0.568298	1093.45	9.1196	1100.21	10.7191	1113.64	26.2178	1113.64	26.2178	98.1865
-Spot 119	190.529	81967.6	3.14201	12.8499	0.873472	2.09666	1.41178	0.195487	1.10914	0.785627	1151.03	11.6917	1147.71	9.70613	1141.44	17.3569	1141.44	17.3569	100.84
-Spot 187	92.5045	1.1041e+06	1.55611	12.7026	0.851734	2.14964	1.37965	0.198129	1.08534	0.786683	1165.26	11.5699	1164.94	9.56126	1164.32	16.8873	1164.32	16.8873	100.081
-Spot 239	356.423	72261.1	4.96155	12.6965	0.994944	2.12265	1.38683	0.195547	0.966112	0.696635	1151.35	10.1866	1156.2	9.57238	1165.27	19.7215	1165.27	19.7215	98.8052
-Spot 113	211.063	36898.3	2.10261	12.6374	0.850296	2.20408	1.23187	0.202104	0.891345	0.723572	1186.61	9.66043	1182.34	8.60456	1174.55	16.837	1174.55	16.837	101.027
-Spot 172	228.469	67989.1	2.37252	12.5314	0.71589	2.24767	1.28645	0.204372	1.06886	0.830858	1198.76	11.6923	1196.06	9.04055	1191.16	14.1307	1191.16	14.1307	100.639
-Spot 95	256.795	115741	3.89376	12.2484	0.830843	2.34591	1.42783	0.208488	1.16121	0.813266	1220.76	12.9142	1226.32	10.1653	1236.1	16.2938	1236.1	16.2938	98.7586
-Spot 183	852.526	378302	5.38895	11.9678	0.769945	2.39857	1.63204	0.208284	1.439	0.881722	1219.67	15.9907	1242.17	11.6959	1281.4	15.0015	1281.4	15.0015	95.1825
-Spot 116	401.951	61114.6	8.61464	11.7927	1.13913	2.2344	1.72387	0.191189	1.29388	0.750564	1127.81	13.3874	1191.9	12.0927	1310.06	22.1069	1310.06	22.1069	86.0887
-Spot 146	122.82	113562	2.47873	11.7581	0.791887	2.57994	1.29071	0.220107	1.01924	0.789673	1282.44	11.8531	1294.97	9.44507	1315.77	15.3559	1315.77	15.3559	97.4669
-Spot 87	43.8077	66929.1	1.81815	11.6671	0.936986	2.73908	1.35305	0.231876	0.976118	0.72142	1344.33	11.8443	1339.13	10.0646	1330.81	18.1312	1330.81	18.1312	101.015
-Spot 184	909.01	566128	4.59239	11.2943	0.704643	2.85428	1.74185	0.233908	1.59296	0.914522	1354.95	19.4664	1369.94	13.0984	1393.37	13.5164	1393.37	13.5164	97.2422
-Spot 270	134.306	47408.8	3.54483	11.1932	0.849699	3.03057	1.11466	0.246131	0.721441	0.64723	1418.49	9.1859	1415.35	8.5102	1410.61	16.2608	1410.61	16.2608	100.559
-Spot 147	116.417	19598.5	3.11749	11.1602	0.829408	3.06556	1.43411	0.248239	1.16993	0.815793	1429.39	14.9987	1424.13	10.9804	1416.26	15.8603	1416.26	15.8603	100.927
-Spot 216	188.854	501913	3.45043	11.039	0.698012	3.16867	0.992814	0.253801	0.706017	0.711127	1458.05	9.21295	1449.56	7.66277	1437.11	13.31	1437.11	13.31	101.457
-Spot 110	82.2773	268473	2.53438	11.031	0.80048	3.15463	1.23464	0.252493	0.93998	0.761341	1451.32	12.2155	1446.13	9.51915	1438.5	15.2611	1438.5	15.2611	100.891
-Spot 159	72.8444	32183.5	2.45334	10.8286	0.919227	3.16763	1.32994	0.248882	0.961124	0.722683	1432.71	12.3473	1449.3	10.2641	1473.71	17.4421	1473.71	17.4421	97.2178
-Spot 225	108.999	60096.2	2.11924	10.8224	0.88066	3.28653	1.29184	0.258078	0.945144	0.731624	1480	12.4985	1477.87	10.0574	1474.79	16.7079	1474.79	16.7079	100.353
-Spot 284	504.312	62212.7	5.875	10.8045	1.59286	2.87881	2.21365	0.225687	1.53722	0.694429	1311.85	18.2467	1376.38	16.6837	1477.93	30.2083	1477.93	30.2083	88.7628
-Spot 273	150.6	336432	5.12116	10.7964	0.612043	3.34531	1.07424	0.262061	0.882832	0.821821	1500.38	11.8173	1491.7	8.39762	1479.37	11.6044	1479.37	11.6044	101.42
-Spot 171	430.281	825304	4.85876	10.7199	0.674846	3.14305	1.25851	0.244473	1.06228	0.844075	1409.91	13.4525	1443.3	9.69464	1492.82	12.7722	1492.82	12.7722	94.446
-Spot 143	56.2569	469294	1.50612	10.6927	1.03587	3.3119	1.41224	0.256951	0.959894	0.679696	1474.23	12.6495	1483.86	11.0145	1497.64	19.5926	1497.64	19.5926	98.4364
-Spot 192	214.013	298909	3.89085	10.6422	0.74719	3.43234	1.32328	0.26504	1.09215	0.825332	1515.57	14.7505	1511.83	10.4053	1506.58	14.1155	1506.58	14.1155	100.597
-Spot 111	301.637	165362	2.37216	10.3843	0.901174	3.50787	1.42669	0.264306	1.10604	0.775251	1511.83	14.9055	1528.99	11.2733	1552.79	16.9208	1552.79	16.9208	97.3624
-Spot 99	103.351	67129.6	2.3024	10.3778	0.918096	3.38485	1.71256	0.254877	1.44567	0.844158	1463.58	18.9286	1500.89	13.4241	1553.96	17.2359	1553.96	17.2359	94.1834
-Spot 227	198.723	56494.4	2.02038	10.2256	0.837988	3.50424	1.39414	0.259997	1.11419	0.799191	1489.83	14.821	1528.17	11.0135	1581.65	15.6734	1581.65	15.6734	94.1947
-Spot 197	55.2221	36776.8	3.07757	10.0659	0.773544	4.06003	1.14879	0.29653	0.849327	0.739321	1674.08	12.5222	1646.31	9.35967	1611.03	14.4127	1611.03	14.4127	103.914
-Spot 170	108.966	102688	3.432	9.96337	0.705213	3.88654	1.37807	0.280968	1.18396	0.859141	1596.24	16.7407	1610.89	11.1296	1630.08	13.1071	1630.08	13.1071	97.9238
-Spot 179	150.226	237892	1.77397	9.95918	0.6468	4.10454	1.19138	0.296603	1.00052	0.839797	1674.44	14.7541	1655.21	9.72749	1630.86	12.0201	1630.86	12.0201	102.672
-Spot 243	120.133	51946.2	1.35874	9.93243	0.732603	3.97007	1.18798	0.286115	0.935196	0.787215	1622.09	13.4117	1628.1	9.6358	1635.86	13.6078	1635.86	13.6078	99.1582
-Spot 178	134.144	58218.8	1.72925	9.84816	0.682292	4.01277	1.08779	0.286739	0.847211	0.778837	1625.21	12.1705	1636.79	8.84205	1651.67	12.6459	1651.67	12.6459	98.3981
-Spot 162	140.073	142092	3.13908	9.79626	0.72483	3.93715	1.36157	0.279853	1.15261	0.846526	1590.62	16.2469	1621.35	11.0254	1661.46	13.4176	1661.46	13.4176	95.7365
-Spot 152	85.7778	115372	1.84719	9.77855	0.789415	4.09238	1.30568	0.290361	1.04001	0.796528	1643.33	15.0863	1652.79	10.6546	1664.8	14.6071	1664.8	14.6071	98.7104
-Spot 231	219.19	245810	1.34828	9.75587	0.972309	3.97533	1.33928	0.281402	0.921021	0.6877	1598.42	13.0386	1629.17	10.866	1669.1	17.9821	1669.1	17.9821	95.7654
-Spot 290	107.542	214122	2.00457	9.74532	0.70853	4.28147	1.17833	0.302745	0.941513	0.799023	1704.91	14.1047	1689.8	9.69947	1671.1	13.0997	1671.1	13.0997	102.023
-Spot 264	266.144	95386	1.66558	9.68901	0.713126	4.17752	1.14503	0.293688	0.895855	0.782383	1659.93	13.1103	1669.62	9.38119	1681.81	13.1685	1681.81	13.1685	98.6992
-Spot 112	139.115	47609.4	3.61162	9.36827	0.735359	4.53699	1.34548	0.3084	1.12674	0.837432	1732.83	17.1206	1737.78	11.1948	1743.72	13.4718	1743.72	13.4718	99.3754
-Spot 224	74.5692	71900.8	3.24831	9.27644	0.736077	4.68365	1.5294	0.315249	1.34062	0.876564	1766.49	20.7143	1764.32	12.7977	1761.75	13.4565	1761.75	13.4565	100.269
-Spot 265	706.398	184691	4.38951	9.25039	0.695581	4.49139	1.50939	0.301459	1.33956	0.887485	1698.54	20.0023	1729.38	12.5358	1766.89	12.7081	1766.89	12.7081	96.1317
-Spot 232	287.162	70515.6	1.83951	9.1735	0.630783	4.78697	1.27197	0.318628	1.10454	0.868373	1783.03	17.2054	1782.62	10.684	1782.12	11.5007	1782.12	11.5007	100.051
-Spot 153	450.945	419221	7.2864	9.1553	0.683413	4.7598	1.62153	0.316191	1.47047	0.906846	1771.1	22.7723	1777.84	13.607	1785.74	12.4549	1785.74	12.4549	99.1801
-Spot 234	147.166	74659.9	3.49911	9.11581	0.811765	4.68914	1.25268	0.310153	0.954066	0.76162	1741.46	14.5597	1765.3	10.4841	1793.62	14.7802	1793.62	14.7802	97.0922
-Spot 136	199.964	165358	4.27847	9.07084	0.680833	4.91825	1.30676	0.323702	1.11539	0.853553	1807.78	17.5834	1805.39	11.0271	1802.62	12.3839	1802.62	12.3839	100.287
-Spot 107	182.302	63679.4	0.769139	9.00785	0.739563	5.04529	1.18483	0.329758	0.925674	0.78127	1837.21	14.7979	1826.96	10.0408	1815.28	13.4295	1815.28	13.4295	101.208
-Spot 109	72.9421	167214	2.33917	8.95848	0.622958	5.08572	1.20165	0.330579	1.02756	0.855127	1841.18	16.4574	1833.73	10.1968	1825.25	11.2981	1825.25	11.2981	100.873
-Spot 190	92.7722	33947.4	1.40752	8.95224	0.853546	5.0471	1.28557	0.32784	0.961329	0.747783	1827.9	15.3005	1827.26	10.8953	1826.51	15.4785	1826.51	15.4785	100.076
-Spot 123	155.466	2.44916e+06	2.37934	8.92498	0.76622	5.28748	1.13353	0.342408	0.835344	0.73694	1898.24	13.7355	1866.84	9.67941	1832.04	13.8871	1832.04	13.8871	103.613
-Spot 160	121.161	47575.1	6.52408	8.85153	0.683862	5.28841	1.01789	0.33965	0.753947	0.740695	1884.98	12.3225	1866.99	8.69213	1847.01	12.37	1847.01	12.37	102.056
-Spot 221	164.954	9056.44	2.25935	8.82647	0.908394	5.45327	1.17821	0.349246	0.750335	0.636843	1931	12.5203	1893.27	10.1099	1852.14	16.422	1852.14	16.422	104.258
-Spot 249	227.527	96952.9	3.14171	8.80094	0.559165	5.02707	1.1719	0.32102	1.02989	0.878824	1794.71	16.1337	1823.89	9.92525	1857.37	10.1014	1857.37	10.1014	96.6264
-Spot 248	106.221	130142	1.76637	8.79092	0.694941	5.35127	1.07971	0.341334	0.826338	0.765332	1893.08	13.5556	1877.09	9.23732	1859.43	12.5516	1859.43	12.5516	101.81
-Spot 217	118.564	514221	1.43414	8.7838	0.85395	5.30103	1.37925	0.337855	1.08309	0.785279	1876.34	17.6322	1869.03	11.7826	1860.89	15.4213	1860.89	15.4213	100.83
-Spot 149	110.483	63364.6	1.75646	8.77555	0.716887	5.15135	1.31815	0.328007	1.10616	0.839178	1828.71	17.6125	1844.62	11.2089	1862.58	12.9431	1862.58	12.9431	98.1816
-Spot 125	56.1664	12763.1	1.20886	8.55816	0.674599	5.48943	1.12039	0.340875	0.894533	0.798413	1890.88	14.6596	1898.94	9.62349	1907.75	12.1156	1907.75	12.1156	99.1154
-Spot 120	103.514	52450.9	1.64434	8.51072	0.78782	5.71692	1.30384	0.353034	1.03891	0.796809	1949.07	17.4745	1933.93	11.2684	1917.73	14.1303	1917.73	14.1303	101.634
-Spot 257	79.1425	88318.1	1.27907	8.44036	0.698485	5.45552	1.22704	0.334107	1.00883	0.822168	1858.26	16.2866	1893.62	10.5295	1932.6	12.5057	1932.6	12.5057	96.153
-Spot 180	325.907	280862	1.86099	8.32603	0.560103	5.6757	1.22741	0.342882	1.09216	0.889811	1900.52	17.9768	1927.68	10.5964	1956.99	9.99879	1956.99	9.99879	97.1144
-Spot 90	57.3685	31030	5.94425	8.21941	0.818174	5.8243	1.34654	0.347354	1.06946	0.794233	1921.95	17.7736	1950.03	11.6695	1979.97	14.5698	1979.97	14.5698	97.0697
-Spot 268	207.366	227415	2.52183	8.20837	0.715183	5.88744	0.96721	0.350648	0.651159	0.673234	1937.69	10.8977	1959.38	8.39516	1982.36	12.7321	1982.36	12.7321	97.7466
-Spot 177	689.576	8.80001e+07	2.52114	8.11921	0.701861	5.98261	1.52996	0.352446	1.35947	0.888568	1946.27	22.8383	1973.32	13.3109	2001.78	12.4647	2001.78	12.4647	97.227
-Spot 267	62.6183	21836.4	0.577863	8.07181	0.727712	6.09001	1.38847	0.356679	1.1825	0.851651	1966.41	20.041	1988.82	12.1104	2012.17	12.9084	2012.17	12.9084	97.7258
-Spot 101	57.0764	41411.9	0.843131	7.88522	0.868318	6.6186	1.34254	0.378676	1.02393	0.762681	2070.1	18.1298	2061.83	11.8431	2053.56	15.3321	2053.56	15.3321	100.805
-Spot 260	157.411	145666	1.6902	7.85757	0.858349	6.61217	1.30954	0.376982	0.989007	0.755232	2062.17	17.4546	2060.97	11.5506	2059.76	15.1431	2059.76	15.1431	100.117
-Spot 196	164.245	867600	4.82948	7.80126	0.606416	7.05615	0.965923	0.399411	0.751843	0.778367	2166.33	13.8331	2118.53	8.59059	2072.44	10.6823	2072.44	10.6823	104.53
-Spot 275	345.309	1.46772e+06	9.20214	7.44601	0.611643	7.08091	1.17399	0.382561	1.00207	0.853559	2088.23	17.8744	2121.65	10.4457	2154.17	10.6761	2154.17	10.6761	96.9392
-Spot 245	254.526	129183	4.57946	7.35207	0.742062	7.77099	1.42839	0.414547	1.22051	0.854465	2235.68	23.0578	2204.85	12.8507	2176.31	12.9213	2176.31	12.9213	102.728
-Spot 195	233.97	481621	2.67334	6.09322	0.654391	10.8471	1.14836	0.479566	0.943661	0.821749	2525.37	19.7174	2510.11	10.6764	2497.78	11.0193	2497.78	11.0193	101.105
-Spot 212	987.198	3.20669e+06	2.36368	6.08315	0.788908	10.5261	1.73282	0.464606	1.54282	0.890351	2459.86	31.5501	2482.22	16.0696	2500.56	13.2779	2500.56	13.2779	98.3724
-Spot 220	189.235	117227	1.29256	5.39001	0.71852	13.4223	1.25689	0.524935	1.03126	0.820487	2720.08	22.8846	2709.83	11.8779	2702.19	11.863	2702.19	11.863	100.662
-Spot 156	353.274	618333	0.794478	5.35402	0.593974	12.8291	1.20571	0.498384	1.04925	0.870237	2606.85	22.4979	2667.18	11.3578	2713.24	9.79642	2713.24	9.79642	96.0787
-Spot 283	258.744	72058.6	0.977212	5.34503	0.671706	13.3907	1.20475	0.519328	1.00012	0.830145	2696.33	22.0375	2707.6	11.3833	2716.02	11.0756	2716.02	11.0756	99.2752
-Spot 89	199.053	530985	2.48236	5.29105	0.83202	13.9976	1.33993	0.537383	1.05031	0.783856	2772.48	23.6669	2749.55	12.6989	2732.74	13.6944	2732.74	13.6944	101.454
-Spot 137	139.513	239851	1.57577	5.17125	0.68283	13.7682	1.05908	0.516606	0.809564	0.764403	2684.77	17.7769	2733.89	10.0259	2770.37	11.2026	2770.37	11.2026	96.9101
-Spot 85	59.2167	35984.8	2.63035	5.04395	0.871139	14.6728	1.33257	0.536996	1.0084	0.75673	2770.86	22.7117	2794.26	12.668	2811.18	14.2394	2811.18	14.2394	98.5657
-Spot 207	104.047	262083	1.11998	4.95454	0.757366	15.3927	1.23387	0.553359	0.974074	0.789449	2839.13	22.369	2839.86	11.7647	2840.37	12.3438	2840.37	12.3438	99.9563
-Spot 145	64.9607	74294.9	1.14454	3.90278	0.650156	23.5402	1.43832	0.66661	1.28299	0.892005	3292.77	33.0813	3249.54	14.0102	3222.96	10.2592	3222.96	10.2592	102.166
1. Analyses with >10% uncertainty (1-sigma) in 206Pb/238U age are not included.
2. Analyses with >10% uncertainty (1-sigma) in 206Pb/207Pb age are not included, unless 206Pb/238U age is <400 Ma.
3. Best age is determined from 206Pb/238U age for analyses with 206Pb/238U age <900 Ma and from 206Pb/207Pb age for analyses with 206Pb/238Uage >900 Ma.
4. Concordance is based on 206Pb/238U age / 206Pb/207Pb age. Value is not reported for 206Pb/238U ages <400 Ma because of large uncertainty in 206Pb/207Pb age.
5. Analyses with 206Pb/238U age >400 Ma and with >20% discordance (<80% concordance) are not included.
6. Analyses with 206Pb/238U age >400 Ma and with >5% reverse discordance (<105% concordance) are not included.
7. All uncertainties are reported at the 2-sigma level, and include only measurement errors.
8. Analyses conducted by LA-ICPMS, as described by Gehrels et al. (2008) and Gehrels and Pecha (2014).
9. U concentration and U/Th are calibrated relative to FC-1 zircon standard and are accurate to ~20%.
10. Common Pb correction is from measured 204Pb with common Pb composition interpreted from Stacey and Kramers (1975).
11. Common Pb composition assigned uncertainties of 1.5 for 206Pb/204Pb, 0.3 for 207Pb/204Pb, and 2.0 for 208Pb/204Pb.
12. U/Pb and 206Pb/207Pb fractionation is calibrated relative to fragments of large Sri Lanka zircons and individual crystals of FC-1, and R33.
13. U decay constants and composition as follows: 238U = 9.8485 x 10-10, 235U = 1.55125 x 10-10, 238U/235U = 137.82.
14. Weighted mean and concordia plots determined with Isoplot (Ludwig, 2008).

## Sheet: 0716MR-02
Internal Uncertainty Level	one sigma
External Uncertainty 206/238 (% two sigma)	0.8
External Uncertainty 206/207 (% two sigma)	0.6
							Isotope ratios						Apparent ages (Ma)
Analysis	U	206Pb	U/Th	206Pb*	±	207Pb*	±	206Pb*	±	error	206Pb*	±	207Pb*	±	206Pb*	±	Best age	±	Conc
	(ppm)	204Pb		207Pb*	(%)	235U*	(%)	238U	(%)	corr.	238U*	(Ma)	235U	(Ma)	207Pb*	(Ma)	(Ma)	(Ma)	(%)
-16MR02 Spot 18	119.695	5311.77	2.1283	21.6672	2.84618	0.0672403	3.25137	0.0105711	1.57183	0.483437	67.788	1.05993	66.0772	2.08	4.53396	68.5442	67.788	1.05993	NA
-16MR02 Spot 40	394.294	70487.2	1.53243	20.3653	1.32365	0.0754945	1.67866	0.0111556	1.0324	0.615015	71.5156	0.734249	73.9002	1.19647	151.746	30.9904	71.5156	0.734249	NA
-16MR02 Spot 297	609.1	197549	2.09717	20.6952	1.31047	0.0746588	1.79812	0.0112108	1.23122	0.684726	71.8677	0.879936	73.1108	1.26841	113.977	30.9199	71.8677	0.879936	NA
-16MR02 Spot 136	733.238	10930.9	3.99406	21.3737	0.974141	0.0736459	1.61903	0.0114213	1.29318	0.798737	73.2094	0.941375	72.1534	1.12765	37.2723	23.326	73.2094	0.941375	NA
-16MR02 Spot 106	679.603	172907	2.25492	20.3453	1.21938	0.0780907	1.6258	0.0115279	1.07533	0.661417	73.8886	0.790009	76.3483	1.19575	154.021	28.5585	73.8886	0.790009	NA
-16MR02 Spot 225	572.342	4225.45	3.33871	21.8012	1.20566	0.0730888	1.72393	0.0115616	1.2322	0.714764	74.1036	0.907879	71.6263	1.19224	NA	NA	74.1036	0.907879	NA
-16MR02 Spot 176	544.194	10110.5	2.4449	21.7751	1.46459	0.0735991	1.76555	0.0116284	0.985982	0.558456	74.5293	0.730614	72.1091	1.22897	NA	NA	74.5293	0.730614	NA
-16MR02 Spot 186	787.115	29868.4	2.59766	20.876	1.19154	0.0774048	1.75136	0.0117247	1.28354	0.732884	75.1428	0.95889	75.7021	1.2776	93.4205	28.2402	75.1428	0.95889	NA
-16MR02 Spot 172	278.875	4361.83	3.68703	21.2448	1.71175	0.0764138	2.10828	0.0117791	1.23076	0.583774	75.4893	0.923673	74.7677	1.51968	51.7707	40.8698	75.4893	0.923673	NA
-16MR02 Spot 212	378.253	10084.3	2.96325	21.7951	2.12043	0.0745729	2.43512	0.0117931	1.19733	0.491691	75.5784	0.899637	73.0297	1.71592	NA	NA	75.5784	0.899637	NA
-16MR02 Spot 213	1456.53	59746	1.94803	20.8253	1.22206	0.0790342	1.57217	0.0119425	0.989081	0.629119	76.5299	0.752467	77.2365	1.16925	99.1517	28.9148	76.5299	0.752467	NA
-16MR02 Spot 236	1062.78	35881.6	2.25082	20.5404	1.02498	0.0804885	1.47133	0.0119959	1.05558	0.717429	76.8701	0.806605	78.6041	1.1129	131.66	24.1044	76.8701	0.806605	NA
-16MR02 Spot 230	526.753	45476.3	3.89827	20.4729	1.1619	0.0809601	1.69923	0.0120265	1.23991	0.729688	77.065	0.949847	79.0472	1.29224	139.381	27.2854	77.065	0.949847	NA
-16MR02 Spot 124	2125.48	85228	1.61778	20.6273	0.752754	0.0804209	1.16919	0.0120365	0.894627	0.765171	77.129	0.685906	78.5406	0.88367	121.721	17.7497	77.129	0.685906	NA
-16MR02 Spot 120	316.887	4107.59	4.62448	21.8595	1.82409	0.076587	2.63025	0.0121474	1.89498	0.720454	77.8352	1.46609	74.931	1.89991	NA	NA	77.8352	1.46609	NA
-16MR02 Spot 98	333.521	2489.73	1.84708	22.8492	1.42311	0.0735562	2.28053	0.0121949	1.78201	0.781404	78.1377	1.38402	72.0685	1.58657	NA	NA	78.1377	1.38402	NA
-16MR02 Spot 4	333.726	69748.7	2.68785	18.9737	2.30993	0.0886078	2.57345	0.0121986	1.1344	0.440811	78.1616	0.881315	86.2056	2.1269	315.117	52.5415	78.1616	0.881315	NA
-16MR02 Spot 12	767.223	5801.17	5.18118	17.5871	1.53474	0.0967521	1.91052	0.0123464	1.13782	0.595558	79.1029	0.89455	93.7739	1.71133	485.145	33.8851	79.1029	0.89455	NA
-16MR02 Spot 259	517.719	66865.2	3.2295	19.3637	1.57011	0.0899749	1.87599	0.0126415	1.0267	0.547284	80.9813	0.826235	87.48	1.57241	268.618	35.9983	80.9813	0.826235	NA
-16MR02 Spot 13	354.086	21452.4	5.72536	20.4563	1.3299	0.0851825	1.68519	0.0126434	1.03501	0.614177	80.9938	0.833047	83.0058	1.34316	141.307	31.2094	80.9938	0.833047	NA
-16MR02 Spot 8	1282.74	15553	8.022	21.3987	0.964345	0.0815717	1.5082	0.0126653	1.15961	0.768872	81.1328	0.93493	79.6215	1.15497	34.483	23.0805	81.1328	0.93493	NA
-16MR02 Spot 90	253.336	6803.05	2.33859	20.9051	2.27768	0.084383	2.52391	0.0127996	1.08735	0.430818	81.9876	0.885845	82.2574	1.99424	90.1104	53.9844	81.9876	0.885845	NA
-16MR02 Spot 109	154.555	2945.31	4.07891	21.8139	5.74546	0.0840341	5.87903	0.0133008	1.24608	0.211953	85.177	1.05439	81.9306	4.62755	NA	NA	85.177	1.05439	NA
-16MR02 Spot 155	94.8925	4691.92	2.94308	19.0823	3.18091	0.0968106	3.49736	0.0134042	1.45373	0.415666	85.835	1.23954	93.828	3.13447	302.12	72.5337	85.835	1.23954	NA
-16MR02 Spot 185	640.879	45375.3	3.5436	20.1626	1.26576	0.0936558	1.75034	0.0137016	1.20894	0.690692	87.7262	1.05338	90.9032	1.52197	175.099	29.5217	87.7262	1.05338	NA
-16MR02 Spot 3	548.338	12284.7	5.36091	20.0989	1.18017	0.0993231	1.62118	0.0144847	1.11149	0.685606	92.7049	1.02303	96.1513	1.48725	182.476	27.4763	92.7049	1.02303	NA
-16MR02 Spot 88	62.8933	3000.26	4.92801	17.8412	3.68338	0.113551	4.05266	0.0146995	1.69018	0.417054	94.0693	1.57839	109.208	4.19616	453.407	81.8117	94.0693	1.57839	NA
-16MR02 Spot 190	698.105	1.07466e+06	2.89865	20.3415	0.937197	0.101427	1.38853	0.0149701	1.02454	0.73786	95.7883	0.974136	98.0927	1.29833	154.498	21.9472	95.7883	0.974136	NA
-16MR02 Spot 43	269.866	22958	1.6385	20.3159	1.3679	0.104266	1.99459	0.0153698	1.45164	0.727788	98.3263	1.41651	100.707	1.9123	157.424	32.0171	98.3263	1.41651	NA
-16MR02 Spot 59	1362.57	71120.8	2.55703	20.0024	0.730181	0.106254	1.28441	0.0154211	1.05667	0.822687	98.6524	1.03449	102.533	1.25264	193.723	16.9933	98.6524	1.03449	NA
-16MR02 Spot 189	759.461	31174.4	3.78864	20.4056	1.1974	0.10418	1.58634	0.0154248	1.04054	0.655934	98.6755	1.01894	100.627	1.51974	147.108	28.0566	98.6755	1.01894	NA
-16MR02 Spot 82	442.616	9739.28	4.00336	20.9786	1.37554	0.101833	1.64194	0.0155007	0.896587	0.546052	99.1574	0.882229	98.4665	1.54085	81.7474	32.6508	99.1574	0.882229	NA
-16MR02 Spot 195	871.917	11270	3.29035	18.3393	1.95901	0.116773	2.25542	0.0155386	1.11768	0.495554	99.398	1.10244	112.142	2.39462	391.913	43.938	99.398	1.10244	NA
-16MR02 Spot 116	959.552	321158	2.67498	20.9902	0.949828	0.102142	1.38762	0.0155565	1.01158	0.729009	99.5114	0.998912	98.7519	1.30577	80.433	22.5663	99.5114	0.998912	NA
-16MR02 Spot 78	447.745	11085.5	2.65619	18.7085	2.43284	0.116287	2.71051	0.0157855	1.19504	0.440894	100.965	1.19717	111.7	2.86705	347.013	55.0197	100.965	1.19717	NA
-16MR02 Spot 16	1371.3	88486.4	2.22657	20.5238	0.836317	0.106401	1.25507	0.0158449	0.93583	0.745639	101.342	0.940972	102.668	1.22555	133.549	19.6702	101.342	0.940972	NA
-16MR02 Spot 134	1285.4	35745.4	3.44069	20.8028	0.810169	0.105739	1.29638	0.0159604	1.01204	0.780668	102.075	1.02491	102.06	1.25877	101.718	19.1811	102.075	1.02491	NA
-16MR02 Spot 281	376.861	8342.64	3.9826	20.8108	1.91295	0.107485	2.30627	0.0162303	1.28821	0.55857	103.787	1.32629	103.662	2.27274	100.807	45.2527	103.787	1.32629	NA
-16MR02 Spot 137	562.703	8139.55	5.28557	20.9244	1.05117	0.108464	1.46227	0.0164675	1.0165	0.69515	105.292	1.06159	104.559	1.45285	87.9282	24.9452	105.292	1.06159	NA
-16MR02 Spot 32	825.396	21420.2	1.09222	21.0487	1.17013	0.110678	1.54783	0.0169034	1.01321	0.654598	108.056	1.08571	106.586	1.56613	73.8574	27.8035	108.056	1.08571	NA
-16MR02 Spot 305	240.878	10370.2	4.03192	21.7625	1.82993	0.107232	2.21802	0.0169324	1.25338	0.56509	108.239	1.34533	103.43	2.18112	NA	NA	108.239	1.34533	NA
-16MR02 Spot 102	447.954	33324.4	3.87103	20.4877	1.06306	0.114423	1.48948	0.0170096	1.04329	0.700437	108.729	1.12484	110.003	1.55284	137.669	24.9723	108.729	1.12484	NA
-16MR02 Spot 73	866.417	86763.4	3.51618	20.6434	1.10736	0.114852	1.63208	0.0172031	1.19893	0.734603	109.955	1.30711	110.394	1.70723	119.848	26.117	109.955	1.30711	NA
-16MR02 Spot 214	909.746	51410.9	1.4997	19.4053	0.959555	0.131209	1.6701	0.0184745	1.36693	0.818471	118.007	1.5984	125.183	1.96695	263.731	22.0459	118.007	1.5984	NA
-16MR02 Spot 28	552.425	80166.6	3.06066	19.6747	1.06494	0.131478	1.42419	0.0187694	0.945622	0.663974	119.874	1.12308	125.425	1.68037	231.955	24.5997	119.874	1.12308	NA
-16MR02 Spot 290	618.625	49170.8	1.51021	20.4541	1.00603	0.127577	1.51927	0.0189339	1.13845	0.74934	120.915	1.36372	121.919	1.74539	141.517	23.6124	120.915	1.36372	NA
-16MR02 Spot 110	418.729	15378.2	2.08188	20.2262	1.21202	0.130593	1.79426	0.0191656	1.32301	0.737359	122.38	1.60384	124.631	2.1044	167.75	28.332	122.38	1.60384	NA
-16MR02 Spot 22	505.603	17094.9	1.65614	19.8839	1.34629	0.135884	1.75042	0.0196045	1.11869	0.639099	125.156	1.3866	129.371	2.12621	207.509	31.2225	125.156	1.3866	NA
-16MR02 Spot 72	462.64	10535.5	2.1485	20.5044	1.00035	0.16246	1.44673	0.0241704	1.04514	0.722416	153.959	1.59002	152.854	2.05299	135.757	23.5189	153.959	1.59002	NA
-16MR02 Spot 264	81.8325	23033.8	3.56032	18.4935	1.88338	0.181715	2.34648	0.0243836	1.39959	0.596463	155.301	2.1476	169.535	3.66376	373.088	42.3916	155.301	2.1476	NA
-16MR02 Spot 271	1109.76	78466.7	2.11206	20.0476	0.663527	0.175308	1.16632	0.0255007	0.959181	0.822402	162.327	1.53757	164.015	1.76644	188.435	15.4417	162.327	1.53757	NA
-16MR02 Spot 56	1279.59	48078.8	2.12786	20.025	0.735888	0.180843	1.27199	0.0262762	1.03751	0.81566	167.2	1.71242	168.786	1.978	191.1	17.1396	167.2	1.71242	NA
-16MR02 Spot 83	155.227	8571.84	1.5981	20.4219	2.37607	0.185368	2.7691	0.0274674	1.42205	0.513541	174.678	2.45066	172.669	4.39696	145.21	55.7409	174.678	2.45066	NA
-16MR02 Spot 97	451.727	14067	2.38208	20.1582	1.13236	0.190198	1.47435	0.0278192	0.944184	0.640406	176.885	1.64741	176.798	2.39232	175.616	26.4019	176.885	1.64741	NA
-16MR02 Spot 249	433.188	17701.8	1.69993	19.5214	1.40602	0.199572	1.77534	0.0282683	1.08396	0.610561	179.701	1.92098	184.764	2.99908	249.977	32.3568	179.701	1.92098	NA
-16MR02 Spot 200	259.632	13650.3	2.73758	20.2354	1.07997	0.195434	1.42093	0.0286946	0.923433	0.649877	182.373	1.6605	181.256	2.35874	166.686	25.2563	182.373	1.6605	NA
-16MR02 Spot 74	214.863	12890.7	2.26764	18.4809	1.4548	0.215421	1.78042	0.0288868	1.02638	0.57648	183.577	1.85762	198.091	3.20416	374.62	32.7291	183.577	1.85762	NA
-16MR02 Spot 273	319.498	26964.4	2.49261	20.0097	1.3323	0.199022	1.70977	0.0288954	1.07159	0.626743	183.631	1.94001	184.298	2.88165	192.872	30.9951	183.631	1.94001	NA
-16MR02 Spot 129	71.9272	28062.8	3.06956	19.8276	1.82067	0.200954	2.1751	0.0289104	1.19005	0.547123	183.725	2.15555	185.933	3.69557	214.098	42.1868	183.725	2.15555	NA
-16MR02 Spot 123	520.833	161835	1.3839	19.8687	0.879093	0.2021	1.38678	0.0291356	1.07255	0.773408	185.136	1.95743	186.902	2.36736	209.279	20.3808	185.136	1.95743	NA
-16MR02 Spot 229	466.804	15227.6	2.17453	20.3696	1.05352	0.198567	1.68687	0.0293479	1.31744	0.780994	186.466	2.42138	183.913	2.83764	151.24	24.6629	186.466	2.42138	NA
-16MR02 Spot 250	193.199	53626.1	1.48009	18.369	1.55917	0.220371	1.85084	0.0293715	0.997283	0.538829	186.614	1.83439	202.218	3.39361	388.285	35.0062	186.614	1.83439	NA
-16MR02 Spot 20	120.081	15758.8	4.23753	18.9815	1.65718	0.213712	1.8236	0.0294338	0.761098	0.417361	187.003	1.40283	196.663	3.26041	314.155	37.6791	187.003	1.40283	NA
-16MR02 Spot 282	380.309	69954.9	1.56167	18.6942	1.00807	0.217266	1.31218	0.0294704	0.840006	0.640163	187.233	1.55015	199.632	2.3781	348.786	22.7916	187.233	1.55015	NA
-16MR02 Spot 130	249.964	15703.4	2.85253	20.0186	1.14029	0.204879	1.44058	0.0297591	0.880336	0.6111	189.04	1.64003	189.246	2.48726	191.843	26.5235	189.04	1.64003	NA
-16MR02 Spot 149	437.608	29451.8	1.41207	19.451	1.22387	0.211745	1.76038	0.0298843	1.26534	0.718788	189.824	2.3669	195.016	3.12349	258.307	28.1374	189.824	2.3669	NA
-16MR02 Spot 42	84.078	4843.97	3.62955	21.115	1.72103	0.195262	2.18915	0.0299154	1.35293	0.618016	190.019	2.5333	181.109	3.63129	66.3541	40.9885	190.019	2.5333	NA
-16MR02 Spot 275	462.834	33915.2	2.58862	19.3754	0.85788	0.213106	1.29167	0.0299596	0.965638	0.747588	190.295	1.81071	196.156	2.30399	267.227	19.6829	190.295	1.81071	NA
-16MR02 Spot 5	340.024	20993.2	2.61452	19.8907	0.885284	0.208479	1.39932	0.0300885	1.08368	0.774434	191.102	2.04053	192.276	2.45115	206.705	20.549	191.102	2.04053	NA
-16MR02 Spot 104	344.25	23141.6	2.2672	20.0922	1.34972	0.206548	1.87939	0.0301117	1.30781	0.695871	191.247	2.46442	190.651	3.26681	183.26	31.4468	191.247	2.46442	NA
-16MR02 Spot 160	583.23	20944.2	1.42875	19.8563	0.801516	0.20925	1.32452	0.0301476	1.05448	0.796122	191.472	1.98935	192.923	2.32723	210.726	18.5547	191.472	1.98935	NA
-16MR02 Spot 112	1004.12	51203.7	1.79368	19.9609	0.780868	0.208411	1.24531	0.0301848	0.970074	0.778982	191.705	1.8323	192.218	2.18079	198.545	18.1538	191.705	1.8323	NA
-16MR02 Spot 70	180.792	9418.85	2.64197	20.2923	1.34869	0.205139	1.94888	0.0302043	1.40684	0.721867	191.827	2.65893	189.466	3.36844	160.138	31.5514	191.827	2.65893	NA
-16MR02 Spot 226	232.236	16087.5	2.88283	19.9331	1.29527	0.208841	1.91459	0.0302048	1.40994	0.736419	191.83	2.66485	192.579	3.35856	201.749	30.0712	191.83	2.66485	NA
-16MR02 Spot 150	398.992	25824.2	2.89639	19.3336	1.32837	0.215833	1.80079	0.0302775	1.21585	0.675176	192.285	2.30337	198.436	3.24593	272.181	30.4591	192.285	2.30337	NA
-16MR02 Spot 274	223.854	37781.4	2.70362	19.0851	0.95129	0.218877	1.58192	0.0303097	1.26393	0.798985	192.487	2.39694	200.974	2.8844	301.794	21.6664	192.487	2.39694	NA
-16MR02 Spot 218	416.377	46146.2	2.77212	19.7824	0.989079	0.211324	1.42641	0.030333	1.0278	0.720549	192.632	1.95058	194.663	2.52676	219.375	22.8779	192.632	1.95058	NA
-16MR02 Spot 246	130.516	12274.6	2.1204	20.3285	1.43202	0.205824	1.74723	0.0303592	1.00108	0.572949	192.796	1.90146	190.042	3.02827	155.985	33.5488	192.796	1.90146	NA
-16MR02 Spot 164	73.1013	4793.59	4.69909	20.3442	3.56413	0.207589	3.77104	0.0306431	1.23195	0.326686	194.572	2.36121	191.527	6.58236	154.14	83.4858	194.572	2.36121	NA
-16MR02 Spot 108	645.731	64888.4	3.21719	19.9819	0.875378	0.212734	1.49607	0.0308433	1.21323	0.810947	195.824	2.34008	195.845	2.66473	196.114	20.3537	195.824	2.34008	NA
-16MR02 Spot 296	120.812	66320.7	3.17251	19.1862	1.43368	0.221599	2.07219	0.0308492	1.49618	0.722026	195.861	2.88635	203.239	3.8168	289.723	32.761	195.861	2.88635	NA
-16MR02 Spot 117	563.506	32201.6	2.68872	20.3165	0.919999	0.209824	1.7205	0.0309309	1.45386	0.845024	196.372	2.81193	193.405	3.02983	157.367	21.5106	196.372	2.81193	NA
-16MR02 Spot 206	220.678	13228	2.58406	19.8996	1.16202	0.214454	1.67843	0.0309646	1.21113	0.721585	196.583	2.34494	197.283	3.00945	205.663	26.9802	196.583	2.34494	NA
-16MR02 Spot 52	499.795	42834.2	4.01524	19.5319	1.19907	0.218522	1.78674	0.030969	1.32465	0.741376	196.61	2.56508	200.679	3.25354	248.791	27.6233	196.61	2.56508	NA
-16MR02 Spot 31	559.882	38907.8	3.12569	18.8771	0.681599	0.226506	1.33831	0.0310243	1.15174	0.86059	196.956	2.23411	207.31	2.50956	326.709	15.4565	196.956	2.23411	NA
-16MR02 Spot 9	588.008	65270.8	2.75941	19.2485	0.838622	0.222146	1.38564	0.0310258	1.10304	0.796055	196.965	2.13976	203.694	2.55738	282.324	19.1875	196.965	2.13976	NA
-16MR02 Spot 256	751.278	47734.5	2.82656	19.7897	0.752264	0.216146	1.44933	0.0310365	1.23882	0.854749	197.032	2.40394	198.697	2.61553	218.501	17.425	197.032	2.40394	NA
-16MR02 Spot 258	481.452	23273.6	2.14542	19.9234	1.05238	0.215345	1.66746	0.0311305	1.29342	0.77568	197.62	2.51726	198.028	3	202.877	24.4279	197.62	2.51726	NA
-16MR02 Spot 220	136.524	334815	1.54009	19.1953	1.73458	0.223741	1.96513	0.0311621	0.92357	0.469978	197.817	1.79923	205.018	3.64821	288.663	39.6314	197.817	1.79923	NA
-16MR02 Spot 55	391.567	17453.9	4.70845	20.1682	1.1672	0.213461	1.41199	0.0312374	0.79459	0.562744	198.288	1.55159	196.453	2.52206	174.451	27.2183	198.288	1.55159	NA
-16MR02 Spot 35	391.223	14678.7	1.55867	20.2364	0.955391	0.213062	1.5995	0.0312842	1.28282	0.802014	198.581	2.5086	196.119	2.85258	166.577	22.3228	198.581	2.5086	NA
-16MR02 Spot 166	128.346	8670.62	2.2724	19.902	1.5169	0.217736	1.80093	0.0314424	0.970756	0.539029	199.569	1.90765	200.024	3.26969	205.382	35.1959	199.569	1.90765	NA
-16MR02 Spot 84	250.654	35955.7	2.26458	19.6876	1.38135	0.220109	1.72545	0.0314426	1.03394	0.599231	199.57	2.03183	202	3.16062	230.438	31.9134	199.57	2.03183	NA
-16MR02 Spot 91	415.611	24963.6	3.0184	20.0007	1.16293	0.217513	1.77226	0.0315659	1.33735	0.754601	200.342	2.63806	199.838	3.21492	193.924	27.0372	200.342	2.63806	NA
-16MR02 Spot 157	252.111	10714.9	2.95488	19.8787	1.24086	0.218867	1.76959	0.0315687	1.26163	0.712951	200.359	2.4889	200.966	3.22646	208.128	28.7811	200.359	2.4889	NA
-16MR02 Spot 231	1104.2	428255	2.05611	19.7547	0.766172	0.220352	1.22458	0.0315846	0.955284	0.780093	200.458	1.88547	202.202	2.24516	222.593	17.7334	200.458	1.88547	NA
-16MR02 Spot 222	357.96	37671	3.61443	19.8824	1.04653	0.219093	1.38334	0.0316071	0.90466	0.653967	200.599	1.78679	201.154	2.52436	207.672	24.2697	200.599	1.78679	NA
-16MR02 Spot 66	296.564	13238.3	3.11167	20.2749	1.13972	0.214975	1.42554	0.0316252	0.856264	0.60066	200.712	1.69214	197.719	2.56112	162.133	26.6464	200.712	1.69214	NA
-16MR02 Spot 154	839.156	59935.4	1.0867	20.0308	0.73082	0.218032	1.32288	0.0316888	1.10268	0.833548	201.109	2.18336	200.27	2.40443	190.426	17.0046	201.109	2.18336	NA
-16MR02 Spot 179	294.544	11302.1	4.06537	20.2436	0.811486	0.216124	1.20869	0.0317453	0.895782	0.741117	201.462	1.77675	198.679	2.18108	165.741	18.9412	201.462	1.77675	NA
-16MR02 Spot 261	196.612	44270.4	2.35203	19.2436	1.12946	0.227721	1.56438	0.0317962	1.08241	0.691908	201.781	2.15026	208.315	2.9463	282.915	25.8262	201.781	2.15026	NA
-16MR02 Spot 158	233.48	43296.4	2.94389	19.465	1.1451	0.225453	1.93861	0.031842	1.56427	0.806904	202.066	3.11184	206.439	3.62145	256.65	26.3424	202.066	3.11184	NA
-16MR02 Spot 314	209.917	6725.44	3.79345	19.3796	2.56408	0.227836	2.74798	0.0320372	0.988374	0.359673	203.286	1.97788	208.411	5.17762	266.735	58.8358	203.286	1.97788	NA
-16MR02 Spot 244	139.085	8408.11	2.96375	19.4645	1.2552	0.226981	1.67015	0.0320568	1.10176	0.659679	203.408	2.20609	207.703	3.13717	256.742	28.8641	203.408	2.20609	NA
-16MR02 Spot 306	499.1	25479.6	3.40748	19.2549	1.36746	0.23048	1.74998	0.0322006	1.09202	0.624016	204.306	2.19607	210.595	3.32831	281.563	31.2944	204.306	2.19607	NA
-16MR02 Spot 248	421.575	22542.8	3.2384	19.6762	0.693328	0.227416	1.24419	0.0324675	1.0331	0.830342	205.973	2.09428	208.063	2.3407	231.779	16.0189	205.973	2.09428	NA
-16MR02 Spot 272	249.198	190276	5.72915	20.3862	1.16056	0.219897	1.62785	0.0325269	1.1415	0.701228	206.344	2.31811	201.824	2.97949	149.343	27.1895	206.344	2.31811	NA
-16MR02 Spot 162	370.997	18407.3	1.34429	19.0416	1.10263	0.235664	1.59982	0.0325601	1.15915	0.724548	206.551	2.35628	214.864	3.0981	306.97	25.0937	206.551	2.35628	NA
-16MR02 Spot 299	383.949	76726	1.6944	19.2482	0.907472	0.23329	1.54436	0.0325817	1.24961	0.809148	206.686	2.54181	212.911	2.96626	282.36	20.7722	206.686	2.54181	NA
-16MR02 Spot 132	102.874	963144	3.5929	19.8231	1.4082	0.227587	1.88765	0.0327346	1.25706	0.66594	207.641	2.56858	208.205	3.55343	214.585	32.62	207.641	2.56858	NA
-16MR02 Spot 303	134.606	4310.23	3.66481	19.1206	2.5156	0.235965	2.65649	0.0327369	0.853659	0.321348	207.655	1.74442	215.111	5.14973	297.527	57.3876	207.655	1.74442	NA
-16MR02 Spot 283	99.369	13611.3	3.77387	19.9983	1.51647	0.228627	1.75726	0.0331747	0.887844	0.505245	210.387	1.83776	209.065	3.32027	194.208	35.2335	210.387	1.83776	NA
-16MR02 Spot 89	393.478	34943.3	2.11696	18.6265	1.08006	0.24607	1.59277	0.0332565	1.17063	0.734964	210.897	2.42887	223.378	3.19374	356.94	24.3723	210.897	2.42887	NA
-16MR02 Spot 79	79.8172	2735.74	3.22956	18.8767	1.98339	0.243298	2.24205	0.0333236	1.04546	0.466294	211.316	2.1734	221.118	4.45494	326.761	45.0008	211.316	2.1734	NA
-16MR02 Spot 203	221.041	69127.6	3.48272	19.5978	1.31249	0.234642	1.78905	0.0333658	1.21576	0.679558	211.579	2.53055	214.024	3.45238	241.004	30.2379	211.579	2.53055	NA
-16MR02 Spot 87	247.778	8898.16	2.23702	20.073	0.993554	0.229164	1.57601	0.033377	1.22338	0.776252	211.649	2.54724	209.509	2.98351	185.478	23.1344	211.649	2.54724	NA
-16MR02 Spot 245	93.1731	6272.68	2.62651	19.712	1.75177	0.234509	2.03142	0.0335412	1.02858	0.506334	212.674	2.15182	213.914	3.91831	227.611	40.4798	212.674	2.15182	NA
-16MR02 Spot 50	1253.24	7508.88	1.99863	15.3182	4.35443	0.303645	4.74069	0.0337491	1.87432	0.395369	213.97	3.94466	269.243	11.2123	782.495	91.534	213.97	3.94466	NA
-16MR02 Spot 94	200.642	5800.5	1.86785	20.8812	1.32074	0.224919	2.0051	0.0340776	1.50867	0.752417	216.018	3.20501	205.995	3.73841	92.8237	31.2678	216.018	3.20501	NA
-16MR02 Spot 240	515.747	51363.3	3.59982	19.9242	0.88502	0.236742	1.521	0.034225	1.237	0.813283	216.937	2.63886	215.749	2.95635	202.811	20.5597	216.937	2.63886	NA
-16MR02 Spot 285	85.1633	10192.2	3.08449	20.1076	1.31724	0.23506	1.69022	0.0342945	1.05911	0.626614	217.37	2.26382	214.367	3.26636	181.476	30.6878	217.37	2.26382	NA
-16MR02 Spot 295	170.112	9917.39	2.954	19.4649	1.3191	0.249159	1.63383	0.0351897	0.964041	0.59005	222.947	2.11256	225.892	3.309	256.671	30.3323	222.947	2.11256	NA
-16MR02 Spot 95	47.9937	2735.41	4.64371	20.5423	2.48495	0.241804	2.87802	0.0360412	1.4519	0.504479	228.248	3.25595	219.896	5.69033	131.427	58.4691	228.248	3.25595	NA
-16MR02 Spot 80	688.071	90406.1	1.9901	19.2133	0.878482	0.29258	1.32617	0.0407882	0.993481	0.749134	257.717	2.50986	260.588	3.04803	286.517	20.0729	257.717	2.50986	NA
-16MR02 Spot 247	120.786	7437.61	1.77585	20.0899	2.31541	0.282116	2.52538	0.0411238	1.00817	0.399216	259.795	2.56711	252.335	5.64236	183.52	53.9234	259.795	2.56711	NA
-16MR02 Spot 301	146.36	8402.52	4.28632	19.4689	1.25116	0.34203	1.67468	0.0483163	1.11318	0.664709	304.176	3.30738	298.709	4.33378	256.205	28.7537	304.176	3.30738	NA
-16MR02 Spot 239	235.319	28247	3.35638	19.3506	1.36493	0.348061	2.28351	0.0488695	1.83068	0.801696	307.577	5.49853	303.262	5.98665	270.17	31.2794	307.577	5.49853	NA
-16MR02 Spot 202	160.631	12894.6	1.80991	17.2138	1.16285	0.391509	1.39909	0.0488998	0.777968	0.556052	307.763	2.33804	335.471	3.99701	532.337	25.4883	307.763	2.33804	NA
-16MR02 Spot 292	1064.55	75117.5	1.87975	16.7506	0.672467	0.41781	1.28121	0.0507804	1.09055	0.851184	319.311	3.3974	354.484	3.83366	591.736	14.5617	319.311	3.3974	NA
-16MR02 Spot 170	112.007	26792.4	1.68376	17.9837	0.92699	0.396943	1.31226	0.051796	0.928825	0.707806	325.539	2.94861	339.429	3.78618	435.671	20.6575	325.539	2.94861	NA
-16MR02 Spot 173	96.6048	20726.8	2.6625	19.1357	1.30774	0.374476	1.90367	0.0519942	1.38339	0.726699	326.753	4.40764	322.965	5.26638	295.751	29.871	326.753	4.40764	NA
-16MR02 Spot 85	276.65	16937.2	1.36081	18.9973	0.860041	0.383294	1.44013	0.0528337	1.15512	0.802096	331.895	3.73678	329.459	4.05184	312.261	19.5654	331.895	3.73678	NA
-16MR02 Spot 278	493.328	33334.7	1.83367	18.788	0.989088	0.392703	1.59138	0.0535344	1.24668	0.783392	336.184	4.08372	336.342	4.5563	337.408	22.387	336.184	4.08372	NA
-16MR02 Spot 144	203.061	49496.9	1.66383	18.5956	1.16593	0.399694	1.5614	0.0539296	1.03855	0.665138	338.602	3.42579	341.426	4.52734	360.68	26.2854	338.602	3.42579	NA
-16MR02 Spot 298	340.341	53821.5	2.76633	18.2152	0.969054	0.408729	1.37664	0.0540202	0.97779	0.710272	339.156	3.23051	347.959	4.05565	407.129	21.6855	339.156	3.23051	NA
-16MR02 Spot 33	131.918	16522.4	3.93342	19.0851	1.26382	0.395207	1.71843	0.0547275	1.16438	0.67758	343.481	3.89473	338.166	4.94255	301.798	28.8371	343.481	3.89473	NA
-16MR02 Spot 277	1088.71	208254	1.16023	18.5677	0.615184	0.40735	1.2369	0.05488	1.07307	0.867544	344.413	3.59878	346.965	3.63523	364.067	13.8592	344.413	3.59878	NA
-16MR02 Spot 313	364.618	42119.8	3.77604	18.638	1.12903	0.408343	1.50925	0.0552219	1.00156	0.663615	346.502	3.37879	347.681	4.44334	355.555	25.4751	346.502	3.37879	NA
-16MR02 Spot 2	388.472	58123.6	2.54269	18.9087	0.772392	0.404153	1.24322	0.0554492	0.974168	0.783585	347.89	3.29921	344.656	3.63338	322.884	17.5448	347.89	3.29921	NA
-16MR02 Spot 47	583.526	83593.7	1.71917	18.8825	0.714827	0.406308	1.13954	0.0556676	0.887453	0.778782	349.224	3.01674	346.213	3.343	326.038	16.236	349.224	3.01674	NA
-16MR02 Spot 241	192.292	14799.3	1.48799	17.3821	1.80105	0.443528	2.26421	0.0559385	1.37218	0.60603	350.878	4.686	372.737	7.06399	510.992	39.5952	350.878	4.686	NA
-16MR02 Spot 224	462.623	24450.9	10.2524	18.6134	0.883034	0.414447	1.40989	0.0559733	1.09911	0.779571	351.09	3.75567	352.072	4.19469	358.53	19.931	351.09	3.75567	NA
-16MR02 Spot 280	832.295	288838	1.97282	18.3482	0.727253	0.426246	1.4099	0.0567469	1.20786	0.856698	355.811	4.18126	360.508	4.27846	390.818	16.3215	355.811	4.18126	NA
-16MR02 Spot 69	493.056	72005.9	2.19995	18.5275	0.711322	0.42226	1.35709	0.0567655	1.15574	0.851626	355.925	4.00206	357.666	4.09113	368.953	16.0099	355.925	4.00206	NA
-16MR02 Spot 99	293.089	33867.3	5.54424	18.5457	0.773501	0.422107	1.11064	0.0568005	0.797008	0.71761	356.138	2.76147	357.556	3.3473	366.746	17.423	356.138	2.76147	NA
-16MR02 Spot 221	182.575	25077.7	2.14812	18.5033	0.904872	0.42371	1.2917	0.056886	0.921794	0.713627	356.66	3.19837	358.7	3.90339	371.902	20.3596	356.66	3.19837	NA
-16MR02 Spot 253	222.579	12542.8	2.45849	18.3266	0.878708	0.432029	1.30842	0.0574491	0.969454	0.740934	360.094	3.39523	364.616	4.00812	393.458	19.711	360.094	3.39523	NA
-16MR02 Spot 86	1100.6	113639	2.79072	18.5793	0.571339	0.432233	1.27172	0.0582687	1.13615	0.893398	365.088	4.03268	364.761	3.89697	362.662	12.8773	365.088	4.03268	NA
-16MR02 Spot 276	243.496	48717.8	1.68731	18.0735	1.05084	0.445923	1.47773	0.0584777	1.03895	0.703071	366.361	3.70016	374.42	4.62744	424.57	23.445	366.361	3.70016	NA
-16MR02 Spot 7	898.428	224672	4.11163	18.5536	0.683812	0.4359	1.20883	0.0586816	0.996826	0.824623	367.602	3.56184	367.357	3.72613	365.789	15.3923	367.602	3.56184	NA
-16MR02 Spot 64	467.002	51465.7	1.72566	17.8654	0.561179	0.453635	1.11603	0.058804	0.964678	0.864383	368.348	3.45376	379.821	3.53638	450.352	12.4855	368.348	3.45376	NA
-16MR02 Spot 243	723.593	61423.5	2.08717	18.691	0.799752	0.434534	1.3657	0.0589312	1.10704	0.810602	369.122	3.97154	366.391	4.2005	349.162	18.0658	369.122	3.97154	NA
-16MR02 Spot 262	428.346	18976.4	1.1854	16.9083	0.788122	0.481404	1.40494	0.0590607	1.16306	0.82784	369.911	4.18119	399.036	4.63582	571.402	17.1466	369.911	4.18119	NA
-16MR02 Spot 205	381.506	325621	2.22086	18.7829	0.854819	0.433665	1.5958	0.0591023	1.34754	0.844429	370.164	4.8476	365.775	4.90138	338.028	19.364	370.164	4.8476	NA
-16MR02 Spot 58	204.841	8572.12	2.56877	18.0016	1.11594	0.456351	1.43294	0.0596072	0.898897	0.627308	373.236	3.25973	381.717	4.55927	433.457	24.8802	373.236	3.25973	NA
-16MR02 Spot 148	916.813	71502.4	1.82407	18.7748	0.751606	0.439496	1.334	0.0598712	1.10211	0.826169	374.842	4.01336	369.897	4.13554	339.049	17.0013	374.842	4.01336	NA
-16MR02 Spot 122	334.381	18991.6	1.85496	18.346	0.858396	0.453435	1.34108	0.0603592	1.03037	0.768311	377.81	3.78096	379.682	4.24823	391.094	19.2635	377.81	3.78096	NA
-16MR02 Spot 171	622.964	78926.1	1.85011	18.4293	0.578797	0.46307	1.19681	0.0619218	1.04754	0.87528	387.302	3.93769	386.391	3.84626	380.916	13.0121	387.302	3.93769	NA
-16MR02 Spot 268	158.477	21674.3	5.11387	18.5221	1.14147	0.463631	1.59566	0.0623089	1.11498	0.698756	389.652	4.21583	386.78	5.13233	369.614	25.7135	389.652	4.21583	NA
-16MR02 Spot 167	261.32	24382.7	2.42487	17.7246	0.678742	0.498927	1.04356	0.0641654	0.792671	0.759583	400.908	3.08108	410.976	3.527	467.934	15.0514	400.908	3.08108	85.6761
-16MR02 Spot 103	243.273	65327.1	2.06475	18.2455	0.712283	0.494424	1.33248	0.0654552	1.12613	0.845135	408.716	4.4598	407.921	4.47631	403.399	15.9503	408.716	4.4598	101.318
-16MR02 Spot 193	628.544	67236.8	1.40957	18.0303	0.731012	0.505038	1.4792	0.0660717	1.28595	0.869352	412.446	5.13773	415.107	5.04009	429.907	16.2944	412.446	5.13773	95.9384
-16MR02 Spot 219	51.376	9907.5	3.05694	18.0369	1.50421	0.507577	2.06999	0.0664282	1.42205	0.686983	414.601	5.71023	416.819	7.07666	429.092	33.5548	414.601	5.71023	96.6229
-16MR02 Spot 254	604.34	49576.7	1.7039	18.1126	0.713842	0.51533	1.3981	0.0677258	1.20213	0.85983	422.44	4.91545	422.027	4.82781	419.752	15.9391	422.44	4.91545	100.64
-16MR02 Spot 100	324.371	20128.5	2.97841	17.9298	1.06852	0.521377	1.50651	0.0678287	1.062	0.704939	423.061	4.34865	426.071	5.24229	442.362	23.7658	423.061	4.34865	95.6369
-16MR02 Spot 6	634.29	281250	1.26996	17.8628	0.741418	0.523876	1.15954	0.0678993	0.891537	0.76887	423.487	3.6542	427.737	4.0476	450.68	16.4735	423.487	3.6542	93.9663
-16MR02 Spot 45	257.532	43315.6	0.997736	18.0943	0.944451	0.521355	1.48723	0.0684484	1.14885	0.772477	426.801	4.7445	426.056	5.17503	422.006	21.081	426.801	4.7445	101.136
-16MR02 Spot 107	596.666	134466	2.87017	17.5543	0.675315	0.538969	1.14795	0.0686494	0.928296	0.808657	428.013	3.8442	437.745	4.08214	489.264	14.8815	428.013	3.8442	87.4811
-16MR02 Spot 198	539.784	25580.1	54.7291	17.2922	1.38448	0.549675	1.75753	0.0689672	1.08264	0.616001	429.93	4.50276	444.783	6.32998	522.34	30.3545	429.93	4.50276	82.3085
-16MR02 Spot 0	425.935	68269.5	0.930998	17.6116	0.707199	0.544717	1.25077	0.0696077	1.03165	0.824809	433.792	4.32794	441.53	4.47849	482.091	15.6011	433.792	4.32794	89.9813
-16MR02 Spot 311	183.082	12335.4	3.06639	18.3796	0.776803	0.52208	1.2769	0.0696243	1.01343	0.793667	433.892	4.25247	426.54	4.44721	386.985	17.4451	433.892	4.25247	112.121
-16MR02 Spot 252	335.85	82464	2.98683	18.0138	0.941523	0.534875	1.65298	0.069911	1.35864	0.821929	435.619	5.72294	435.04	5.84902	431.954	20.9789	435.619	5.72294	100.849
-16MR02 Spot 44	348.203	51844.6	1.42679	18.09	0.833666	0.539249	1.19561	0.0707807	0.857022	0.716807	440.857	3.65194	437.929	4.25307	422.543	18.6053	440.857	3.65194	104.334
-16MR02 Spot 237	388.61	126427	2.99706	17.8826	0.915556	0.551949	1.3021	0.0716174	0.925859	0.711052	445.892	3.98879	446.273	4.70217	448.212	20.3426	445.892	3.98879	99.4826
-16MR02 Spot 257	585.08	95944.2	1.07488	17.9633	0.595044	0.557452	1.16454	0.0726576	1.00104	0.859599	452.147	4.37108	449.867	4.23233	438.203	13.2438	452.147	4.37108	103.182
-16MR02 Spot 286	179.353	6741.51	1.857	13.8728	3.76293	0.743152	3.88035	0.0748049	0.947356	0.244142	465.039	4.25042	564.243	16.799	987.39	76.6106	465.039	4.25042	47.0978
-16MR02 Spot 182	333.851	33348.2	2.69545	17.8463	0.735057	0.580779	1.1974	0.075205	0.945228	0.789401	467.438	4.26197	464.962	4.46696	452.73	16.3194	467.438	4.26197	103.249
-16MR02 Spot 234	460.289	72113.4	1.85384	17.0048	0.679654	0.709452	1.28594	0.0875349	1.09165	0.848916	540.942	5.66423	544.421	5.41901	559.032	14.8024	540.942	5.66423	96.7639
-16MR02 Spot 29	53.1638	141346	0.896035	16.193	1.24512	0.768678	1.63113	0.0903151	1.05369	0.645988	557.4	5.62651	579.004	7.19815	664.681	26.6612	557.4	5.62651	83.8599
-16MR02 Spot 24	272.988	131722	1.29085	16.5739	0.794652	0.763752	1.22279	0.0918472	0.929378	0.760047	566.453	5.03982	576.173	5.37652	614.675	17.1676	566.453	5.03982	92.1549
-16MR02 Spot 48	311.307	15447	1.98017	16.7936	0.918736	0.764937	1.47716	0.0932089	1.15669	0.783049	574.487	6.35754	576.854	6.5007	586.187	19.9172	574.487	6.35754	98.0041
-16MR02 Spot 151	194.218	53567.3	1.33783	16.1299	1.06516	0.816618	1.52731	0.0955737	1.09458	0.716674	588.417	6.15551	606.16	6.97138	673.069	22.8047	588.417	6.15551	87.423
-16MR02 Spot 187	407.126	63308.2	0.916444	16.0787	0.809643	0.841955	1.47965	0.0982261	1.23849	0.837012	604.005	7.14076	620.224	6.86762	679.843	17.299	604.005	7.14076	88.8447
-16MR02 Spot 119	152.594	23983.9	1.83285	16.6113	0.755139	0.818015	1.35727	0.0985948	1.1278	0.830937	606.169	6.52482	606.941	6.20104	609.803	16.3215	606.169	6.52482	99.404
-16MR02 Spot 181	166.026	47179.8	4.07416	16.088	0.835754	0.857942	1.36195	0.100149	1.07537	0.78958	615.284	6.31061	628.999	6.38589	678.601	17.8781	615.284	6.31061	90.6695
-16MR02 Spot 25	89.93	9658.35	1.55868	16.4846	1.34336	0.8418	1.75937	0.100687	1.13612	0.645754	618.436	6.69968	620.139	8.16514	626.336	28.962	618.436	6.69968	98.7387
-16MR02 Spot 168	113.714	19934.4	0.948632	16.1124	1.04596	0.895333	1.60588	0.104672	1.21853	0.758794	641.732	7.44308	649.23	7.70281	675.381	22.3779	641.732	7.44308	95.0178
-16MR02 Spot 304	394.031	667270	8.4647	16.0735	0.729086	0.905536	1.36598	0.10561	1.15514	0.845646	647.201	7.11302	654.682	6.59128	680.529	15.5883	647.201	7.11302	95.1026
-16MR02 Spot 145	512.118	78910.7	0.68811	16.5162	0.600278	0.889741	1.01293	0.106626	0.815895	0.805484	653.121	5.06773	646.23	4.84253	622.207	12.9695	653.121	5.06773	104.969
-16MR02 Spot 30	133.982	14541.2	1.88177	15.9111	0.830178	0.944335	1.4128	0.109022	1.14316	0.809143	667.067	7.24435	675.148	6.96743	702.221	17.6513	667.067	7.24435	94.9939
-16MR02 Spot 263	39.5822	5586.33	0.614581	15.0908	1.21903	1.19926	1.5902	0.131314	1.02113	0.642136	795.36	7.64059	800.245	8.805	813.888	25.5059	795.36	7.64059	97.7235
-16MR02 Spot 163	419.978	133304	4.28841	14.507	0.602782	1.42987	1.55578	0.150509	1.43426	0.921892	903.815	12.0954	901.496	9.29616	895.799	12.4374	903.815	12.0954	100.895
-16MR02 Spot 53	305.403	21352.2	1.4674	14.2282	0.612929	1.53957	1.14343	0.158942	0.965275	0.844191	950.894	8.53388	946.333	7.03861	935.717	12.5531	935.717	12.5531	101.622
-16MR02 Spot 294	85.4183	46355.6	2.45782	14.1533	0.969505	1.48594	1.37919	0.152597	0.980934	0.711238	915.505	8.37196	924.659	8.37096	946.577	19.8452	946.577	19.8452	96.7174
-16MR02 Spot 270	243.961	164668	2.45413	13.9988	0.711317	1.56126	1.42127	0.158581	1.23046	0.865748	948.887	10.857	954.966	8.79707	969.009	14.5207	969.009	14.5207	97.9234
-16MR02 Spot 307	62.5877	64140	3.0406	13.9834	1.00617	1.54535	1.37559	0.156793	0.938014	0.681901	938.932	8.19596	948.64	8.48023	971.252	20.5225	971.252	20.5225	96.6724
-16MR02 Spot 228	542.011	68036.1	13.4619	13.8262	0.591042	1.42142	1.29952	0.142598	1.15733	0.890586	859.339	9.31104	897.958	7.74594	994.241	12.0052	994.241	12.0052	86.4316
-16MR02 Spot 17	103.359	51222.3	1.27684	13.7975	0.758923	1.69202	0.980675	0.169392	0.621096	0.633335	1008.76	5.79976	1005.53	6.25876	998.465	15.3996	998.465	15.3996	101.031
-16MR02 Spot 159	141.545	24091	4.00229	13.7368	0.955265	1.65941	1.4259	0.165397	1.05861	0.742416	986.701	9.68521	993.151	9.03439	1007.41	19.3588	1007.41	19.3588	97.9447
-16MR02 Spot 293	875.841	912369	4.03194	13.7311	0.672796	1.67207	1.28268	0.16659	1.09207	0.851397	993.294	10.0531	997.972	8.15013	1008.25	13.6469	1008.25	13.6469	98.5171
-16MR02 Spot 180	467.731	118135	19.3966	13.7128	0.827629	1.67257	1.43389	0.166418	1.17093	0.816609	992.345	10.7695	998.164	9.11199	1010.95	16.7735	1010.95	16.7735	98.1595
-16MR02 Spot 118	323.638	155122	4.93603	13.6523	0.809791	1.69903	1.38634	0.168304	1.12525	0.811667	1002.76	10.4497	1008.17	8.86145	1019.92	16.3966	1019.92	16.3966	98.3177
-16MR02 Spot 269	195.667	60894.2	4.07394	13.5925	0.624646	1.80821	1.01605	0.178335	0.801362	0.788701	1057.87	7.81835	1048.43	6.64311	1028.79	12.6299	1028.79	12.6299	102.827
-16MR02 Spot 128	618.664	102572	5.1126	13.5567	0.712596	1.76468	1.42599	0.173584	1.23517	0.866186	1031.83	11.7771	1032.57	9.24226	1034.12	14.4161	1034.12	14.4161	99.778
-16MR02 Spot 207	129.665	104224	2.43928	13.5046	0.680881	1.74282	1.1873	0.170774	0.972669	0.819227	1016.38	9.14604	1024.51	7.66046	1041.9	13.7595	1041.9	13.7595	97.5499
-16MR02 Spot 11	205.092	752341	3.91904	13.5025	0.626846	1.68609	1.19678	0.16519	1.01948	0.851855	985.557	9.31722	1003.29	7.62804	1042.21	12.6681	1042.21	12.6681	94.5643
-16MR02 Spot 152	328.139	7.77169e+06	3.55448	13.4986	0.648829	1.77534	1.28259	0.173883	1.10637	0.862608	1033.47	10.5646	1036.48	8.33093	1042.84	13.11	1042.84	13.11	99.1019
-16MR02 Spot 126	306.633	65996.2	3.56599	13.4931	0.613114	1.81701	1.2316	0.177892	1.06814	0.86728	1055.45	10.3992	1051.61	8.06636	1043.66	12.3881	1043.66	12.3881	101.13
-16MR02 Spot 251	117.806	32038.6	4.83524	13.4261	0.795396	1.77809	1.14161	0.173217	0.818914	0.717332	1029.81	7.79415	1037.48	7.4193	1053.7	16.0409	1053.7	16.0409	97.7329
-16MR02 Spot 76	209.915	137077	3.70588	13.306	0.644032	1.88521	1.1907	0.182009	1.0015	0.841098	1077.94	9.94127	1075.9	7.89996	1071.77	12.9327	1071.77	12.9327	100.576
-16MR02 Spot 77	161.502	149455	0.756342	13.252	0.721307	1.81379	1.15265	0.174404	0.899069	0.78	1036.33	8.60695	1050.45	7.54453	1079.94	14.4534	1079.94	14.4534	95.9617
-16MR02 Spot 191	138.839	37123.5	1.72742	13.1385	0.707015	1.95707	1.15714	0.186569	0.916026	0.791629	1102.76	9.28479	1100.88	7.77623	1097.15	14.1413	1097.15	14.1413	100.511
-16MR02 Spot 216	173.17	31652.3	2.08852	13.1049	0.712607	1.86398	1.3918	0.17724	1.19553	0.858983	1051.88	11.6032	1068.4	9.19793	1102.28	14.2704	1102.28	14.2704	95.4277
-16MR02 Spot 38	623.012	326149	33.4191	12.9663	0.610975	2.07559	1.20147	0.195275	1.03452	0.861048	1149.89	10.8952	1140.78	8.23313	1123.5	12.1993	1123.5	12.1993	102.348
-16MR02 Spot 227	43.3063	24760	1.31876	12.9469	0.890834	1.95052	1.49214	0.183233	1.19704	0.802228	1084.61	11.9498	1098.62	10.0163	1126.46	17.7621	1126.46	17.7621	96.2851
-16MR02 Spot 101	79.0909	57387.2	1.36373	12.6396	0.74159	2.1699	1.07791	0.199004	0.782256	0.725718	1169.97	8.36966	1171.45	7.49226	1174.21	14.6791	1174.21	14.6791	99.6387
-16MR02 Spot 49	52.1622	27683.6	1.24333	12.5768	1.14785	1.94816	1.76534	0.17778	1.34122	0.759752	1054.83	13.0508	1097.81	11.8455	1184.06	22.6942	1184.06	22.6942	89.0864
-16MR02 Spot 196	77.2944	17909.7	1.00666	12.5693	0.797706	2.15766	1.27754	0.19678	0.99788	0.781097	1158	10.577	1167.52	8.86404	1185.23	15.7425	1185.23	15.7425	97.7026
-16MR02 Spot 19	418.066	621013	8.25399	12.4312	0.555376	2.32338	1.19065	0.209566	1.05319	0.88455	1226.5	11.763	1219.46	8.45212	1207.01	10.9387	1207.01	10.9387	101.615
-16MR02 Spot 127	241.527	327994	3.93659	12.3431	0.600985	2.38076	1.27762	0.213221	1.12744	0.882457	1245.95	12.7733	1236.84	9.13576	1220.97	11.8116	1220.97	11.8116	102.046
-16MR02 Spot 178	287.763	338424	2.21141	12.205	0.794165	2.33668	1.54653	0.20693	1.32704	0.85808	1212.44	14.6671	1223.51	10.9974	1243.1	15.5399	1243.1	15.5399	97.5335
-16MR02 Spot 36	34.9458	21408.1	1.77136	12.1035	1.2062	2.18489	1.50372	0.191879	0.897922	0.597132	1131.54	9.31862	1176.24	10.4749	1259.41	23.5595	1259.41	23.5595	89.8475
-16MR02 Spot 223	247.963	307088	4.04237	12.0601	0.573326	2.43308	1.08726	0.21291	0.923812	0.849671	1244.3	10.4537	1252.43	7.82427	1266.41	11.1779	1266.41	11.1779	98.2538
-16MR02 Spot 146	173.453	91925.5	1.34257	11.9666	0.584577	2.37964	1.31592	0.206618	1.17894	0.89591	1210.77	13.0139	1236.5	9.4083	1281.61	11.3903	1281.61	11.3903	94.4729
-16MR02 Spot 188	360.108	222125	1.83326	11.6715	0.621469	2.7415	1.32114	0.232169	1.16584	0.882452	1345.85	14.161	1339.79	9.82959	1330.08	12.0269	1330.08	12.0269	101.186
-16MR02 Spot 125	117.611	48145.6	3.08292	11.617	0.849897	2.63478	1.14346	0.222088	0.764966	0.668993	1292.9	8.96156	1310.4	8.4164	1339.14	16.4265	1339.14	16.4265	96.547
-16MR02 Spot 139	106.643	77029.1	1.86288	11.6154	0.789888	2.83872	1.41274	0.239246	1.17129	0.829088	1382.78	14.577	1365.83	10.6082	1339.4	15.2663	1339.4	15.2663	103.239
-16MR02 Spot 208	350.026	90450.8	3.05194	11.437	0.709659	2.32524	1.14034	0.19296	0.892618	0.782762	1137.39	9.30732	1220.03	8.09692	1369.26	13.659	1369.26	13.659	83.0657
-16MR02 Spot 238	228.88	178821	2.29215	11.4128	0.613881	2.78378	1.11161	0.230524	0.926724	0.833681	1337.24	11.1917	1351.19	8.30423	1373.33	11.8091	1373.33	11.8091	97.3724
-16MR02 Spot 131	161.475	41710	2.8583	11.2343	0.668158	2.87493	1.18129	0.234347	0.974175	0.824669	1357.24	11.9228	1375.36	8.89942	1403.59	12.7988	1403.59	12.7988	96.6978
-16MR02 Spot 15	300.426	111703	1.54931	11.2081	0.611392	2.83943	1.26595	0.230914	1.10852	0.875647	1339.29	13.4056	1366.02	9.50655	1408.06	11.7042	1408.06	11.7042	95.1155
-16MR02 Spot 51	199.048	70676.7	1.59263	11.178	0.709872	3.01878	1.24469	0.24484	1.02241	0.821422	1411.81	12.9632	1412.38	9.4938	1413.21	13.58	1413.21	13.58	99.9006
-16MR02 Spot 232	286.061	133892	2.58597	11.0308	0.622491	2.9402	1.30628	0.235328	1.14842	0.879155	1362.36	14.103	1392.33	9.89782	1438.52	11.8676	1438.52	11.8676	94.706
-16MR02 Spot 266	135.871	155126	1.97597	11.0297	0.579681	2.98125	1.1583	0.238589	1.00281	0.86576	1379.36	12.4526	1402.85	8.80724	1438.71	11.0511	1438.71	11.0511	95.8742
-16MR02 Spot 111	359.425	107787	13.2065	10.953	1.07165	2.70506	1.49111	0.214979	1.03682	0.695332	1255.29	11.8263	1329.85	11.0545	1452.01	20.3938	1452.01	20.3938	86.4522
-16MR02 Spot 41	335.66	2.76148e+06	0.675581	10.8918	0.531842	3.03148	0.914836	0.239575	0.744358	0.813652	1384.48	9.27403	1415.58	6.98506	1462.67	10.1064	1462.67	10.1064	94.6549
-16MR02 Spot 175	150.718	26194.6	1.36081	10.8014	0.716236	3.18819	1.17019	0.249869	0.925387	0.790803	1437.8	11.9259	1454.3	9.04512	1478.47	13.5816	1478.47	13.5816	97.2492
-16MR02 Spot 23	200.482	216605	2.60181	10.7095	0.636892	3.24738	1.13787	0.252343	0.942934	0.828681	1450.55	12.2481	1468.55	8.83378	1494.66	12.0509	1494.66	12.0509	97.0486
-16MR02 Spot 142	112.71	150259	1.60613	10.5548	0.604538	3.35153	1.32067	0.256674	1.17418	0.88908	1472.8	15.4601	1493.15	10.3285	1522.14	11.3954	1522.14	11.3954	96.7591
-16MR02 Spot 135	217.213	112821	1.07422	10.5527	0.710033	3.35606	1.11049	0.25697	0.853841	0.768886	1474.32	11.2526	1494.21	8.68744	1522.52	13.3836	1522.52	13.3836	96.8344
-16MR02 Spot 10	78.8591	38740.9	1.03095	10.2243	0.778028	3.14329	1.30367	0.233187	1.04606	0.802392	1351.18	12.7512	1443.36	10.0427	1581.88	14.5514	1581.88	14.5514	85.4161
-16MR02 Spot 37	260.689	48119.9	1.55976	10.2022	0.83455	3.70223	1.38918	0.274059	1.11057	0.799438	1561.37	15.3999	1571.85	11.1062	1585.93	15.6004	1585.93	15.6004	98.4515
-16MR02 Spot 75	28.2217	77494.2	0.747699	10.0705	0.915996	3.82567	1.74156	0.279542	1.48121	0.850507	1589.05	20.8606	1598.16	14.0199	1610.18	17.0692	1610.18	17.0692	98.6881
-16MR02 Spot 289	126.254	46275	1.22244	10.0144	0.702288	4.13905	1.25621	0.300756	1.04157	0.829133	1695.06	15.5248	1662.05	10.2737	1620.58	13.0688	1620.58	13.0688	104.596
-16MR02 Spot 133	112.727	89403.1	1.46851	9.98273	0.726923	4.02684	1.30819	0.291676	1.08763	0.831402	1649.9	15.8324	1639.63	10.6411	1626.47	13.517	1626.47	13.517	101.441
-16MR02 Spot 287	75.0624	32787.5	2.89391	9.95217	0.712502	3.88207	1.10499	0.28033	0.844598	0.764348	1593.02	11.9211	1609.96	8.92194	1632.17	13.2391	1632.17	13.2391	97.6015
-16MR02 Spot 204	253.762	123814	0.761346	9.80174	0.609516	4.01651	0.872731	0.285654	0.62462	0.715707	1619.77	8.94645	1637.54	7.0952	1660.42	11.2842	1660.42	11.2842	97.552
-16MR02 Spot 34	469.531	83103.3	2.72168	9.46812	0.499394	4.50515	1.19516	0.3095	1.08582	0.908518	1738.25	16.5437	1731.92	9.93139	1724.28	9.17236	1724.28	9.17236	100.81
-16MR02 Spot 242	171.241	101062	2.22884	9.44957	0.790033	4.44986	1.22709	0.305103	0.938941	0.765174	1716.56	14.1501	1721.67	10.1738	1727.88	14.5023	1727.88	14.5023	99.3452
-16MR02 Spot 62	361.384	195430	2.99821	9.39936	0.800504	3.53439	1.8726	0.241047	1.69288	0.904024	1392.14	21.1962	1534.95	14.8218	1737.65	14.6766	1737.65	14.6766	80.1159
-16MR02 Spot 63	307.155	528715	3.69743	9.37888	0.645466	4.59326	1.26294	0.312579	1.08553	0.859531	1753.38	16.6647	1748.04	10.5313	1741.65	11.8278	1741.65	11.8278	100.674
-16MR02 Spot 46	176.23	260500	2.09951	9.22671	0.52557	4.68622	1.04897	0.313731	0.907812	0.865429	1759.04	13.9755	1764.78	8.77818	1771.57	9.59455	1771.57	9.59455	99.2927
-16MR02 Spot 138	207.345	89316.6	1.73355	9.09532	0.807733	4.59993	1.4067	0.303569	1.15168	0.818713	1708.98	17.2892	1749.26	11.7333	1797.71	14.7011	1797.71	14.7011	95.0642
-16MR02 Spot 291	204.737	63350.5	4.46648	9.02489	0.652231	4.98862	1.34872	0.326671	1.18052	0.875293	1822.23	18.7388	1817.4	11.4084	1811.85	11.8484	1811.85	11.8484	100.573
-16MR02 Spot 199	176.542	125965	2.36996	8.94582	0.633656	4.99481	1.23878	0.324211	1.06445	0.859273	1810.26	16.8002	1818.44	10.4805	1827.82	11.4885	1827.82	11.4885	99.0395
-16MR02 Spot 93	129.786	66406.1	1.29728	8.93128	0.669582	5.05044	0.977763	0.327288	0.712517	0.728722	1825.23	11.3261	1827.82	8.28735	1830.77	12.1375	1830.77	12.1375	99.6973
-16MR02 Spot 210	193.306	62958.5	2.91338	8.92238	0.657019	4.87513	1.29661	0.315613	1.11783	0.862111	1768.27	17.287	1797.97	10.9251	1832.57	11.9071	1832.57	11.9071	96.4911
-16MR02 Spot 312	78.4367	43316	1.64302	8.90434	0.631613	4.86119	1.35925	0.314074	1.20359	0.88548	1760.72	18.5443	1795.55	11.4474	1836.24	11.4416	1836.24	11.4416	95.8873
-16MR02 Spot 26	191.9	364643	0.931702	8.89354	0.629284	4.92734	1.41276	0.317962	1.26487	0.895317	1779.77	19.6715	1806.95	11.9253	1838.44	11.3963	1838.44	11.3963	96.8088
-16MR02 Spot 105	214.082	293744	2.36857	8.88291	0.697985	4.50648	1.30333	0.290456	1.10068	0.844511	1643.81	15.9704	1732.17	10.8309	1840.6	12.6372	1840.6	12.6372	89.3081
-16MR02 Spot 260	199.424	78112.2	2.40461	8.87471	0.514689	4.84304	1.09789	0.31186	0.969776	0.883306	1749.86	14.8615	1792.41	9.2402	1842.27	9.31662	1842.27	9.31662	94.9834
-16MR02 Spot 147	127.098	84901.4	2.61761	8.87259	0.753173	4.92495	1.24983	0.317059	0.997397	0.798027	1775.35	15.4782	1806.54	10.549	1842.71	13.631	1842.71	13.631	96.3446
-16MR02 Spot 14	60.6056	63026.4	1.25551	8.83536	0.886529	4.99729	1.58007	0.320366	1.30794	0.827769	1791.52	20.4578	1818.86	13.3694	1850.31	16.0302	1850.31	16.0302	96.8223
-16MR02 Spot 141	128.309	75398.3	10.1261	8.81325	0.658194	5.0647	1.26025	0.323875	1.07471	0.852779	1808.62	16.9489	1830.21	10.6868	1854.84	11.8943	1854.84	11.8943	97.5083
-16MR02 Spot 310	216.099	955545	1.48875	8.78268	0.529213	5.08422	1.1995	0.323996	1.07644	0.89741	1809.21	16.9809	1833.48	10.178	1861.12	9.55588	1861.12	9.55588	97.211
-16MR02 Spot 184	136.194	25820	2.2791	8.75392	0.606916	4.57102	1.26097	0.290338	1.1053	0.876551	1643.22	16.0325	1744	10.5058	1867.04	10.9533	1867.04	10.9533	88.0117
-16MR02 Spot 265	120.516	62164.5	3.2081	8.73966	0.781706	5.1489	1.40689	0.32651	1.16974	0.831432	1821.45	18.5607	1844.21	11.9627	1869.98	14.1029	1869.98	14.1029	97.4044
-16MR02 Spot 233	113.764	105933	1.00834	8.72105	0.611099	5.11173	1.34137	0.323463	1.19408	0.890195	1806.62	18.8133	1838.06	11.392	1873.83	11.0198	1873.83	11.0198	96.4133
-16MR02 Spot 21	67.4379	31499.9	1.09201	8.70321	0.822635	5.08849	1.30712	0.321334	1.01579	0.777121	1796.24	15.9245	1834.19	11.0928	1877.52	14.8259	1877.52	14.8259	95.6709
-16MR02 Spot 65	210.073	845269	1.6126	8.70295	0.719365	5.11263	1.2186	0.322848	0.983622	0.80717	1803.62	15.4752	1838.21	10.3496	1877.57	12.9643	1877.57	12.9643	96.0615
-16MR02 Spot 81	205.432	462317	3.82443	8.66583	0.579177	5.20879	1.01247	0.327517	0.830453	0.820223	1826.34	13.2077	1854.05	8.62488	1885.27	10.4278	1885.27	10.4278	96.8739
-16MR02 Spot 300	178.902	101550	1.96431	8.63052	0.697063	5.36482	1.38997	0.335954	1.20255	0.86516	1867.17	19.4944	1879.26	11.8966	1892.62	12.5397	1892.62	12.5397	98.6556
-16MR02 Spot 60	258.423	94433.9	2.16277	8.61508	0.580628	5.41312	1.307	0.338372	1.17095	0.895906	1878.83	19.0843	1886.93	11.2022	1895.84	10.4408	1895.84	10.4408	99.1029
-16MR02 Spot 39	270.809	136642	2.19685	8.4545	0.464877	5.77955	1.28192	0.354543	1.19466	0.931929	1956.26	20.1577	1943.35	11.0969	1929.61	8.3254	1929.61	8.3254	101.381
-16MR02 Spot 113	78.9561	238500	2.01583	8.40917	0.70903	5.74321	1.21256	0.350425	0.983651	0.811221	1936.63	16.4545	1937.89	10.4866	1939.23	12.6846	1939.23	12.6846	99.8658
-16MR02 Spot 68	426.19	293869	4.33307	8.33781	0.637707	5.44228	1.2691	0.329246	1.09724	0.864584	1834.73	17.5201	1891.54	10.8864	1954.47	11.3878	1954.47	11.3878	93.8735
-16MR02 Spot 235	135.724	688227	1.50691	8.15303	0.946726	5.90453	1.31854	0.349295	0.917752	0.696034	1931.23	15.3154	1961.9	11.4497	1994.4	16.8287	1994.4	16.8287	96.8329
-16MR02 Spot 197	61.9255	139308	1.57019	8.15022	0.741974	6.30104	1.42049	0.372622	1.2113	0.852739	2041.73	21.1978	2018.6	12.4485	1995.01	13.1876	1995.01	13.1876	102.342
-16MR02 Spot 1	357.706	63507.8	2.66549	8.12934	0.646404	6.1994	1.2317	0.365673	1.04845	0.851221	2009.01	18.0972	2004.36	10.7697	1999.57	11.4826	1999.57	11.4826	100.472
-16MR02 Spot 217	68.75	33764.2	2.5625	8.03156	0.800332	6.28001	1.34858	0.365972	1.08542	0.804863	2010.42	18.7467	2015.67	11.8129	2021.04	14.1843	2021.04	14.1843	99.4746
-16MR02 Spot 57	333.737	73126.9	2.60176	7.93781	0.766315	6.38769	1.24484	0.367902	0.981015	0.788065	2019.52	17.0087	2030.58	10.9294	2041.82	13.547	2041.82	13.547	98.9081
-16MR02 Spot 279	37.8524	36075.1	1.81605	7.80398	0.86049	6.4816	1.16207	0.367017	0.781004	0.672079	2015.35	13.5171	2043.4	10.2227	2071.83	15.1601	2071.83	15.1601	97.274
-16MR02 Spot 194	365.246	463403	5.26366	7.76915	0.514137	6.57493	1.0331	0.37064	0.896083	0.867371	2032.41	15.6206	2055.99	9.10537	2079.7	9.04903	2079.7	9.04903	97.7261
-16MR02 Spot 215	543.814	155514	8.44807	7.74239	0.553821	6.07805	1.22632	0.34145	1.09414	0.892214	1893.64	17.9533	1987.1	10.693	2085.78	9.74316	2085.78	9.74316	90.7883
-16MR02 Spot 67	119.548	121195	1.68549	7.68263	0.601409	6.82354	1.06612	0.380371	0.8803	0.825701	2078.02	15.6373	2088.78	9.44184	2099.39	10.564	2099.39	10.564	98.9818
-16MR02 Spot 96	85.6442	36287.4	1.20573	7.46704	0.782958	7.12904	1.23556	0.386249	0.955816	0.773589	2105.41	17.168	2127.68	11.0028	2149.24	13.6745	2149.24	13.6745	97.9606
-16MR02 Spot 121	257.123	178192	1.85965	6.94644	0.631567	8.4481	1.4057	0.425804	1.25583	0.893386	2286.77	24.177	2280.36	12.7632	2274.6	10.8829	2274.6	10.8829	100.535
-16MR02 Spot 211	235.929	213057	1.14909	6.73408	0.644362	9.03718	1.2324	0.441569	1.05053	0.852424	2357.66	20.7439	2341.77	11.2673	2327.95	11.0407	2327.95	11.0407	101.276
-16MR02 Spot 177	359.577	142218	3.90435	6.37734	0.605803	9.85276	1.08013	0.455917	0.894256	0.827912	2421.5	18.0522	2421.1	9.95725	2420.75	10.278	2420.75	10.278	100.031
-16MR02 Spot 267	100.747	61307.9	1.5618	6.22371	1.16352	10.1865	1.83349	0.460007	1.417	0.772845	2439.59	28.7806	2451.86	16.9543	2462.04	19.6607	2462.04	19.6607	99.0881
-16MR02 Spot 192	226.222	188612	2.13062	6.06369	0.815623	9.24156	1.51345	0.406603	1.27486	0.842358	2199.37	23.7565	2362.24	13.8677	2505.95	13.7204	2505.95	13.7204	87.7658
-16MR02 Spot 201	117.318	417846	1.513	5.92394	0.859387	11.137	1.27895	0.478703	0.947183	0.740597	2521.61	19.7669	2534.66	11.9168	2545.1	14.4008	2545.1	14.4008	99.0771
-16MR02 Spot 140	148.577	163790	2.28245	5.90312	0.658234	10.846	1.34881	0.464558	1.1773	0.872839	2459.65	24.0735	2510.02	12.5401	2551	11.0229	2551	11.0229	96.419
-16MR02 Spot 54	57.8509	121654	1.5984	5.6232	0.622692	10.5273	2.63425	0.429527	2.55959	0.97166	2303.59	49.5788	2482.33	24.4321	2632.04	10.3457	2632.04	10.3457	87.5207
-16MR02 Spot 209	134.126	42740.4	0.799901	5.59368	0.680629	12.2176	1.3087	0.495873	1.11779	0.854118	2596.04	23.8867	2621.26	12.2836	2640.79	11.2994	2640.79	11.2994	98.3053
-16MR02 Spot 61	292.844	627956	5.24555	5.56761	1.44606	11.8064	2.47247	0.47695	2.0055	0.811131	2513.97	41.7498	2589.17	23.1487	2648.54	23.9936	2648.54	23.9936	94.9191
-16MR02 Spot 174	201.042	192186	2.0992	5.55309	0.686019	12.3168	1.20628	0.496272	0.99221	0.82254	2597.75	21.2145	2628.85	11.329	2652.87	11.376	2652.87	11.376	97.9224
-16MR02 Spot 156	90.7645	90395	0.901817	5.45067	0.948328	12.6541	1.55961	0.500458	1.23817	0.793895	2615.77	26.6222	2654.25	14.6772	2683.7	15.681	2683.7	15.681	97.4685
-16MR02 Spot 308	107.777	153190	1.08564	5.38858	0.674126	12.9953	1.17546	0.5081	0.962948	0.819207	2648.51	20.9142	2679.32	11.0831	2702.63	11.1296	2702.63	11.1296	97.9976
-16MR02 Spot 284	76.593	74914.5	0.900974	5.29388	0.692357	12.5979	1.50114	0.483905	1.33194	0.887286	2544.25	28.0002	2650.06	14.1223	2731.86	11.3959	2731.86	11.3959	93.1326
-16MR02 Spot 165	131.583	60734.9	1.6342	5.25902	0.678809	13.3145	1.18093	0.508062	0.966335	0.818286	2648.35	20.9867	2702.21	11.1537	2742.72	11.1619	2742.72	11.1619	96.5591
-16MR02 Spot 255	68.6285	64784.5	2.84667	4.89848	0.671254	16.0559	1.07544	0.570667	0.840236	0.781293	2910.56	19.6798	2880.13	10.28	2858.91	10.9252	2858.91	10.9252	101.807
-16MR02 Spot 114	49.5607	58941.8	1.27191	3.61791	0.515454	24.5414	0.96085	0.644236	0.810888	0.843928	3205.65	20.4815	3290.15	9.37459	3342.03	8.05752	3342.03	8.05752	95.9191
-16MR02 Spot 302	152.978	126297	0.742391	3.2796	0.468914	30.2815	1.07218	0.720585	0.964206	0.899294	3498.24	26.0315	3495.99	10.5391	3494.69	7.25192	3494.69	7.25192	100.101
-16MR02 Spot 92	155.886	518348	0.905678	3.27691	0.621324	29.5311	1.16799	0.702153	0.989016	0.846769	3428.81	26.3001	3471.34	11.4716	3495.96	9.60811	3495.96	9.60811	98.0792
1. Analyses with >10% uncertainty (1-sigma) in 206Pb/238U age are not included.
2. Analyses with >10% uncertainty (1-sigma) in 206Pb/207Pb age are not included, unless 206Pb/238U age is <400 Ma.
3. Best age is determined from 206Pb/238U age for analyses with 206Pb/238U age <900 Ma and from 206Pb/207Pb age for analyses with 206Pb/238Uage >900 Ma.
4. Concordance is based on 206Pb/238U age / 206Pb/207Pb age. Value is not reported for 206Pb/238U ages <400 Ma because of large uncertainty in 206Pb/207Pb age.
5. Analyses with 206Pb/238U age >400 Ma and with >20% discordance (<80% concordance) are not included.
6. Analyses with 206Pb/238U age >400 Ma and with >5% reverse discordance (<105% concordance) are not included.
7. All uncertainties are reported at the 2-sigma level, and include only measurement errors.
8. Analyses conducted by LA-ICPMS, as described by Gehrels et al. (2008) and Gehrels and Pecha (2014).
9. U concentration and U/Th are calibrated relative to FC-1 zircon standard and are accurate to ~20%.
10. Common Pb correction is from measured 204Pb with common Pb composition interpreted from Stacey and Kramers (1975).
11. Common Pb composition assigned uncertainties of 1.5 for 206Pb/204Pb, 0.3 for 207Pb/204Pb, and 2.0 for 208Pb/204Pb.
12. U/Pb and 206Pb/207Pb fractionation is calibrated relative to fragments of large Sri Lanka zircons and individual crystals of FC-1, and R33.
13. U decay constants and composition as follows: 238U = 9.8485 x 10-10, 235U = 1.55125 x 10-10, 238U/235U = 137.82.
14. Weighted mean and concordia plots determined with Isoplot (Ludwig, 2008).

## Sheet: 0816MR-01
Internal Uncertainty Level	one sigma
External Uncertainty 206/238 (% two sigma)	0.7
External Uncertainty 206/207 (% two sigma)	0.5
							Isotope ratios						Apparent ages (Ma)
Analysis	U	206Pb	U/Th	206Pb*	±	207Pb*	±	206Pb*	±	error	206Pb*	±	207Pb*	±	206Pb*	±	Best age	±	Conc
	(ppm)	204Pb		207Pb*	(%)	235U*	(%)	238U	(%)	corr.	238U*	(Ma)	235U	(Ma)	207Pb*	(Ma)	(Ma)	(Ma)	(%)
-16MR01 Spot 273	2095.87	159358	2.55817	21.1926	0.829281	0.0577292	1.38233	0.00887703	1.10595	0.800063	56.9725	0.627311	56.9877	0.766059	57.6056	19.7732	56.9725	0.627311	NA
-16MR01 Spot 246	2071.62	55188.5	1.96463	20.467	0.940881	0.0774074	1.30047	0.0114954	0.897762	0.690334	73.6815	0.657718	75.7045	0.948712	140.071	22.0922	73.6815	0.657718	NA
-16MR01 Spot 49	2028.62	42507.8	8.99518	20.9468	1.07849	0.0756701	1.64511	0.0115009	1.24227	0.755128	73.7162	0.910536	74.0659	1.17509	85.3912	25.5709	73.7162	0.910536	NA
-16MR01 Spot 311	548.107	10568.1	1.71171	21.2257	1.48481	0.075413	1.92752	0.0116144	1.22909	0.637657	74.4395	0.90967	73.8232	1.37246	53.9287	35.4292	74.4395	0.90967	NA
-16MR01 Spot 167	209.842	178755	1.74819	18.002	2.31871	0.0897252	2.50666	0.0117199	0.952317	0.379915	75.1119	0.711151	87.2474	2.09567	433.413	51.6616	75.1119	0.711151	NA
-16MR01 Spot 284	245.262	4109.13	2.67558	22.477	2.11397	0.0719056	2.54362	0.0117271	1.41461	0.556142	75.1577	1.05702	70.5061	1.73256	NA	NA	75.1577	1.05702	NA
-16MR01 Spot 247	753.038	171854	1.53657	20.9675	1.06558	0.0775052	1.80169	0.0117914	1.4528	0.806354	75.5674	1.09144	75.7967	1.3159	83.0098	25.3062	75.5674	1.09144	NA
-16MR01 Spot 228	479.642	27113.6	2.08884	20.4828	1.77396	0.0793614	2.59951	0.0117947	1.90013	0.730959	75.5885	1.42789	77.5444	1.94072	138.228	41.6688	75.5885	1.42789	NA
-16MR01 Spot 84	412.083	5555.97	1.67664	20.3045	2.87266	0.0802255	3.13374	0.0118193	1.25227	0.399607	75.7455	0.942983	78.3569	2.36315	158.762	67.2368	75.7455	0.942983	NA
-16MR01 Spot 61	224.427	2978.49	3.83148	22.1683	2.05509	0.0737048	2.32376	0.0118554	1.08465	0.466766	75.9754	0.819231	72.2091	1.61969	NA	NA	75.9754	0.819231	NA
-16MR01 Spot 25	387.824	14323.5	2.28168	20.8197	1.76088	0.0785537	2.07772	0.0118667	1.10282	0.530782	76.0472	0.833733	76.7843	1.53653	99.7745	41.6393	76.0472	0.833733	NA
-16MR01 Spot 164	464.454	8408.06	2.46946	21.1295	1.63614	0.07742	2.03116	0.0118694	1.2036	0.592569	76.0647	0.910135	75.7164	1.48198	64.7514	38.9535	76.0647	0.910135	NA
-16MR01 Spot 62	197.525	8765.14	3.15063	21.8795	2.41747	0.0750742	2.74982	0.0119183	1.31048	0.476569	76.3763	0.99499	73.5033	1.94979	NA	NA	76.3763	0.99499	NA
-16MR01 Spot 46	328.867	1579.12	2.69144	12.6998	8.65708	0.12945	8.74746	0.0119285	1.25419	0.143377	76.4412	0.953054	123.603	10.1803	1164.75	171.852	76.4412	0.953054	NA
-16MR01 Spot 186	1120.77	14643.7	4.53473	20.9765	0.981399	0.0783824	1.42507	0.01193	1.03329	0.725078	76.4505	0.785288	76.623	1.05175	81.9829	23.2707	76.4505	0.785288	NA
-16MR01 Spot 206	1061.73	21903.9	4.41256	21.3907	1.05579	0.0768738	1.84903	0.0119314	1.51796	0.820951	76.4595	1.15377	75.2015	1.34026	35.3744	25.2916	76.4595	1.15377	NA
-16MR01 Spot 47	551.3	8944.98	3.27558	21.7246	1.2991	0.0758328	1.86626	0.0119535	1.33988	0.717948	76.6005	1.02028	74.2194	1.33572	NA	NA	76.6005	1.02028	NA
-16MR01 Spot 279	329.666	5401.22	1.34976	20.364	2.71646	0.0809209	2.92724	0.0119567	1.0907	0.372604	76.6209	0.830758	79.0104	2.22514	151.904	63.6405	76.6209	0.830758	NA
-16MR01 Spot 12	422.856	6856.58	3.09144	21.8992	1.72906	0.0753441	2.15875	0.011972	1.29249	0.598724	76.7178	0.985697	73.7581	1.5358	NA	NA	76.7178	0.985697	NA
-16MR01 Spot 293	449.951	10282.3	2.02329	19.844	1.60806	0.0833505	1.97711	0.0120012	1.15027	0.581791	76.9042	0.879347	81.2901	1.54455	212.135	37.2634	76.9042	0.879347	NA
-16MR01 Spot 6	748.598	12536	1.91641	20.8205	1.5233	0.0798057	1.82431	0.0120563	1.00381	0.550243	77.2551	0.770867	77.9623	1.36904	99.7153	36.0388	77.2551	0.770867	NA
-16MR01 Spot 30	765.628	7379.09	1.46701	21.4542	2.43843	0.0774944	2.61662	0.0120634	0.949082	0.362713	77.3004	0.729263	75.7865	1.91085	28.278	58.4696	77.3004	0.729263	NA
-16MR01 Spot 215	169.793	5453.7	3.36827	16.0499	3.19947	0.103649	3.36619	0.0120705	1.04626	0.310815	77.3459	0.804407	100.139	3.21	683.706	68.3309	77.3459	0.804407	NA
-16MR01 Spot 312	700.905	18041.1	1.99153	20.6001	1.27004	0.0812224	1.7787	0.0121404	1.2453	0.700117	77.7907	0.962906	79.2935	1.35673	124.791	29.9099	77.7907	0.962906	NA
-16MR01 Spot 155	373.265	8709.54	2.20284	20.844	1.43903	0.0803212	1.75185	0.0121478	0.999078	0.5703	77.8381	0.772988	78.4469	1.32252	97.0046	34.0707	77.8381	0.772988	NA
-16MR01 Spot 199	607.688	14084.1	2.9757	20.9242	1.6409	0.0800138	2.04031	0.0121479	1.21256	0.594302	77.8386	0.938165	78.1579	1.53484	87.9542	38.9279	77.8386	0.938165	NA
-16MR01 Spot 230	440.562	16985.7	1.86933	20.2507	1.38091	0.0827345	1.60884	0.0121566	0.8255	0.513103	77.8942	0.639147	80.7125	1.24827	164.926	32.2631	77.8942	0.639147	NA
-16MR01 Spot 190	409.799	237277	1.53219	20.3513	1.53268	0.082339	1.92551	0.0121587	1.16553	0.605312	77.9071	0.902566	80.3416	1.48736	153.372	35.8845	77.9071	0.902566	NA
-16MR01 Spot 170	212.984	32257	3.05145	19.6248	1.53451	0.0853999	1.87785	0.0121605	1.0824	0.576405	77.9185	0.838314	83.2091	1.50023	237.832	35.3887	77.9185	0.838314	NA
-16MR01 Spot 304	750.602	21362.4	2.36629	19.1048	2.06896	0.0880231	2.39601	0.0122019	1.20841	0.504343	78.1826	0.93906	85.6601	1.96824	299.397	47.1878	78.1826	0.93906	NA
-16MR01 Spot 280	1577.05	136515	2.06805	20.885	0.861034	0.0809511	1.22353	0.0122672	0.869277	0.710467	78.5984	0.679089	79.0388	0.930381	92.3709	20.3967	78.5984	0.679089	NA
-16MR01 Spot 222	378.426	5949.74	3.06987	20.1047	1.78328	0.084439	2.05774	0.0123177	1.02673	0.498963	78.9198	0.805357	82.3098	1.62689	181.804	41.5759	78.9198	0.805357	NA
-16MR01 Spot 20	495.075	11124	1.99783	21.1943	1.34252	0.0808354	1.87215	0.0124311	1.30483	0.696968	79.642	1.0328	78.9301	1.42172	57.4091	32.0239	79.642	1.0328	NA
-16MR01 Spot 103	213.125	6250.01	2.38314	21.8283	2.96756	0.0788231	3.39443	0.0124842	1.64796	0.48549	79.9801	1.3099	77.0378	2.51826	NA	NA	79.9801	1.3099	NA
-16MR01 Spot 173	1012.14	15615.5	8.72221	20.8039	1.07772	0.0828429	1.81733	0.0125051	1.46328	0.805184	80.1133	1.16503	80.8143	1.41174	101.607	25.5095	80.1133	1.16503	NA
-16MR01 Spot 123	1773.04	31943.7	9.79774	20.9667	1.14365	0.082725	1.53904	0.012585	1.0299	0.669185	80.622	0.825155	80.7037	1.19398	83.0993	27.1252	80.622	0.825155	NA
-16MR01 Spot 171	1009.85	29474.5	6.68398	20.9806	1.1673	0.0830336	1.75182	0.0126403	1.30625	0.745654	80.9742	1.05111	80.993	1.36374	81.525	27.7146	80.9742	1.05111	NA
-16MR01 Spot 156	350.536	1663.32	1.6594	9.63779	4.45734	0.180897	4.5691	0.0126502	1.0044	0.219824	81.0367	0.808835	168.832	7.10701	1691.59	82.2402	81.0367	0.808835	NA
-16MR01 Spot 86	475.099	7433.89	3.18565	20.2103	1.58352	0.0865817	1.90034	0.0126966	1.0506	0.552849	81.3322	0.849109	84.314	1.53753	169.586	36.9593	81.3322	0.849109	NA
-16MR01 Spot 201	787.023	46902.3	6.60284	21.2647	1.10081	0.0823435	1.66503	0.0127051	1.24922	0.750266	81.3863	1.0103	80.3459	1.28623	49.5407	26.2733	81.3863	1.0103	NA
-16MR01 Spot 146	100.698	3110.55	1.78648	20.148	3.32487	0.0873443	3.52285	0.0127689	1.16435	0.330515	81.7927	0.94634	85.0265	2.87338	176.791	77.5525	81.7927	0.94634	NA
-16MR01 Spot 202	599.454	12967.9	8.41182	20.3141	1.46607	0.0867337	1.83966	0.0127842	1.11129	0.604076	81.8897	0.904278	84.4561	1.49084	157.658	34.3355	81.8897	0.904278	NA
-16MR01 Spot 265	958.391	118080	3.08224	20.6334	1.05341	0.0863148	1.51599	0.0129224	1.0902	0.719138	82.7697	0.896589	84.0646	1.22308	120.992	24.8377	82.7697	0.896589	NA
-16MR01 Spot 16	547.904	63307.2	2.04384	20.4293	1.39112	0.0872129	1.74884	0.0129277	1.05981	0.606011	82.8035	0.871952	84.9038	1.42445	144.356	32.6289	82.8035	0.871952	NA
-16MR01 Spot 154	450.714	5785.33	2.79631	21.9888	3.11773	0.0810457	3.35032	0.0129306	1.22653	0.366095	82.8218	1.00934	79.1276	2.55037	NA	NA	82.8218	1.00934	NA
-16MR01 Spot 7	229.869	18937.9	2.57622	17.6153	2.2578	0.101334	2.57978	0.0129519	1.24805	0.48378	82.9571	1.02871	98.0068	2.41018	481.622	49.9028	82.9571	1.02871	NA
-16MR01 Spot 212	704.442	6162.53	3.26691	21.1877	1.28372	0.0844756	1.86616	0.0129868	1.35447	0.725808	83.1795	1.11941	82.3441	1.47601	58.1551	30.6065	83.1795	1.11941	NA
-16MR01 Spot 109	1713.03	36577.5	4.07354	20.9487	1.02031	0.0859562	1.49616	0.0130654	1.09429	0.731399	83.6795	0.909781	83.7294	1.20247	85.1778	24.2089	83.6795	0.909781	NA
-16MR01 Spot 124	791.449	67740.9	8.83958	20.0204	1.1216	0.0902813	1.65033	0.0131147	1.21062	0.733564	83.9932	1.01024	87.7654	1.38759	191.634	26.1103	83.9932	1.01024	NA
-16MR01 Spot 13	549.293	39806.4	4.77118	20.4536	1.09232	0.0899124	1.63998	0.0133437	1.22326	0.7459	85.4504	1.03838	87.4218	1.37371	141.603	25.6342	85.4504	1.03838	NA
-16MR01 Spot 148	860.643	72469.9	12.3828	20.8685	1.11035	0.0890625	1.67508	0.0134857	1.2542	0.748739	86.3535	1.07583	86.6296	1.39094	94.2673	26.2992	86.3535	1.07583	NA
-16MR01 Spot 300	217.914	14991.8	4.47022	20.6052	1.93278	0.0917586	2.18628	0.0137187	1.02185	0.467392	87.8352	0.891455	89.1403	1.86576	124.203	45.5177	87.8352	0.891455	NA
-16MR01 Spot 235	353.959	9439.55	2.24759	20.8606	1.96599	0.0925494	2.1807	0.0140084	0.943574	0.432693	89.6771	0.840311	89.8755	1.87568	95.1234	46.561	89.6771	0.840311	NA
-16MR01 Spot 209	1122.26	36637.9	1.62185	21.0766	0.897897	0.0940046	1.32151	0.014376	0.969625	0.733724	92.0138	0.885851	91.227	1.153	70.6852	21.3456	92.0138	0.885851	NA
-16MR01 Spot 223	376.778	74793.1	3.32122	20.9227	1.54112	0.0949207	2.06307	0.0144101	1.37157	0.664822	92.2303	1.256	92.0769	1.81603	88.1268	36.5384	92.2303	1.256	NA
-16MR01 Spot 72	822.193	41159.4	2.6682	20.159	1.21306	0.100788	1.73567	0.0147423	1.24139	0.715221	94.3416	1.16261	97.5037	1.61363	175.519	28.2855	94.3416	1.16261	NA
-16MR01 Spot 26	902.573	23162.9	2.07043	21.1207	1.07509	0.0964609	1.5604	0.0147825	1.13095	0.724777	94.5966	1.06202	93.5042	1.39388	65.7225	25.5722	94.5966	1.06202	NA
-16MR01 Spot 107	1686.68	18358.1	3.37682	21.2005	1.0737	0.0963857	1.40025	0.0148268	0.898814	0.641897	94.8779	0.846531	93.4346	1.24992	56.7595	25.6049	94.8779	0.846531	NA
-16MR01 Spot 50	742.72	15542.5	4.826	20.7569	0.90138	0.0984619	1.52912	0.0148292	1.23521	0.807787	94.8934	1.16354	95.3556	1.39173	106.953	21.2952	94.8934	1.16354	NA
-16MR01 Spot 172	1022.6	13854.2	3.6395	21.3342	0.975784	0.0959557	1.47627	0.0148537	1.1078	0.750404	95.0491	1.04523	93.0363	1.31242	41.7466	23.3359	95.0491	1.04523	NA
-16MR01 Spot 259	546.526	11008.2	2.10662	20.6537	1.77683	0.0992214	2.07623	0.0148693	1.07406	0.517311	95.1479	1.01444	96.0573	1.90294	118.695	41.8881	95.1479	1.01444	NA
-16MR01 Spot 291	426.687	49793.1	2.63559	21.0168	1.64551	0.0975207	2.17983	0.0148714	1.42967	0.655863	95.1611	1.3505	94.4852	1.9667	77.4326	39.1061	95.1611	1.3505	NA
-16MR01 Spot 152	1001.31	53053.7	5.1638	20.7811	1.11637	0.0991732	1.6785	0.0149538	1.25343	0.746757	95.6846	1.19048	96.0129	1.53773	104.152	26.3995	95.6846	1.19048	NA
-16MR01 Spot 266	616.608	20306.9	4.43444	21.2859	1.25138	0.0968785	1.73933	0.0149626	1.20803	0.694536	95.7408	1.14803	93.8909	1.55985	47.1616	29.8973	95.7408	1.14803	NA
-16MR01 Spot 313	606.817	17967.5	4.20637	20.7113	1.29105	0.0996718	1.69493	0.0149785	1.09817	0.647915	95.8416	1.04472	96.4733	1.55988	112.124	30.4764	95.8416	1.04472	NA
-16MR01 Spot 73	918.734	12716.3	4.48576	21.1723	0.898888	0.0978009	1.44835	0.0150245	1.13566	0.784105	96.1336	1.08365	94.7443	1.31016	59.9217	21.4239	96.1336	1.08365	NA
-16MR01 Spot 153	1957.06	23955.6	3.98103	18.5768	3.38813	0.111511	3.58453	0.0150307	1.17022	0.326465	96.1731	1.11709	107.347	3.65148	362.961	76.4158	96.1731	1.11709	NA
-16MR01 Spot 282	513.146	4389.23	5.79052	22.1189	1.73259	0.0938474	2.14897	0.0150617	1.27129	0.591583	96.3698	1.21603	91.0811	1.87209	NA	NA	96.3698	1.21603	NA
-16MR01 Spot 240	872.051	36195.9	3.72487	20.8306	1.16936	0.0997174	1.9397	0.0150717	1.54759	0.797848	96.4333	1.48128	96.5155	1.78589	98.5618	27.6747	96.4333	1.48128	NA
-16MR01 Spot 35	849.067	43179	3.46082	20.2602	0.890701	0.102632	1.36851	0.0150874	1.03898	0.759204	96.5332	0.99549	99.2032	1.2934	163.83	20.8015	96.5332	0.99549	NA
-16MR01 Spot 36	2005.15	35269.3	2.27721	20.5064	0.870173	0.101603	1.5839	0.0151177	1.32346	0.835569	96.7253	1.27056	98.2551	1.48334	135.549	20.4292	96.7253	1.27056	NA
-16MR01 Spot 192	449.684	25489.9	2.52466	19.5201	1.29944	0.106914	1.74435	0.0151427	1.1637	0.667126	96.8846	1.11902	103.139	1.71074	250.135	29.908	96.8846	1.11902	NA
-16MR01 Spot 79	659.917	27674.8	1.89555	20.6045	1.4263	0.101427	1.88601	0.0151636	1.23399	0.654285	97.0173	1.18822	98.0925	1.76349	124.285	33.5977	97.0173	1.18822	NA
-16MR01 Spot 224	1156.87	16758.8	4.32308	20.7145	1.25837	0.101029	1.67091	0.0151847	1.09929	0.657898	97.1512	1.05996	97.7254	1.55678	111.751	29.7256	97.1512	1.05996	NA
-16MR01 Spot 126	1784.09	25033.8	2.10722	21.1433	0.905987	0.0991555	1.30255	0.0152117	0.935861	0.718481	97.3226	0.903963	95.9965	1.19312	63.1518	21.578	97.3226	0.903963	NA
-16MR01 Spot 308	2088.98	24309.9	3.48824	21.2409	0.935134	0.0987788	1.2704	0.0152239	0.859904	0.676878	97.3997	0.831249	95.6485	1.15964	52.18	22.3151	97.3997	0.831249	NA
-16MR01 Spot 63	336.021	26110.5	4.60071	20.2869	1.50462	0.103545	1.77951	0.0152416	0.950156	0.533941	97.5126	0.919549	100.043	1.69539	160.755	35.2175	97.5126	0.919549	NA
-16MR01 Spot 137	1128.43	35674.8	2.02284	20.7735	0.864149	0.101327	1.56489	0.015273	1.30466	0.833705	97.7115	1.26519	98.0005	1.46192	105.013	20.4229	97.7115	1.26519	NA
-16MR01 Spot 302	355.689	7301.91	1.15117	20.9979	2.44306	0.100637	2.65745	0.0153328	1.04571	0.3935	98.0918	1.01799	97.3645	2.46724	79.566	58.0177	98.0918	1.01799	NA
-16MR01 Spot 194	555.328	10127.5	1.14521	21.4583	1.80371	0.098737	2.11365	0.0153731	1.10189	0.521323	98.3476	1.07546	95.6099	1.92864	27.863	43.2285	98.3476	1.07546	NA
-16MR01 Spot 290	797.352	24455.6	2.61994	21.0661	1.21767	0.100673	1.68442	0.015388	1.16385	0.690951	98.4419	1.13701	97.3969	1.56435	71.8865	28.9666	98.4419	1.13701	NA
-16MR01 Spot 258	338.339	4449.98	2.5023	21.2795	3.92172	0.0997314	4.17214	0.0153986	1.4237	0.341239	98.5091	1.39181	96.5284	3.84182	47.8439	93.7079	98.5091	1.39181	NA
-16MR01 Spot 17	2406.32	78559.7	2.26021	21.097	0.775587	0.100626	1.34828	0.0154035	1.10287	0.817983	98.5401	1.0785	97.3538	1.25164	68.3917	18.4716	98.5401	1.0785	NA
-16MR01 Spot 157	789.001	23565.3	1.81678	19.9784	1.25549	0.106367	1.60526	0.0154189	1.00031	0.623142	98.6382	0.979173	102.636	1.56705	196.513	29.1844	98.6382	0.979173	NA
-16MR01 Spot 267	740.052	76394.5	3.34482	20.1029	1.0518	0.105712	1.47889	0.0154195	1.03963	0.70298	98.6421	1.01771	102.035	1.43565	182.013	24.5226	98.6421	1.01771	NA
-16MR01 Spot 0	1583.8	19872.6	1.25915	20.6154	0.806401	0.103173	1.34614	0.0154327	1.07788	0.800716	98.7259	1.05604	99.7006	1.27833	123.047	18.9925	98.7259	1.05604	NA
-16MR01 Spot 52	2467.52	26949.6	3.97459	20.6464	0.802025	0.103532	1.63167	0.0155098	1.42095	0.870858	99.215	1.39901	100.031	1.55436	119.504	18.9124	99.215	1.39901	NA
-16MR01 Spot 243	848.831	7796.88	2.92369	21.3261	1.18136	0.100341	1.61212	0.0155266	1.09695	0.680441	99.3219	1.08116	97.0909	1.49272	42.6323	28.2652	99.3219	1.08116	NA
-16MR01 Spot 2	1331.26	29520.9	3.36021	20.9685	0.969526	0.102084	1.6368	0.0155315	1.31876	0.805695	99.3529	1.30018	98.6982	1.53946	82.8891	22.9961	99.3529	1.30018	NA
-16MR01 Spot 55	683.431	22074	1.63091	20.782	0.969081	0.103058	1.54711	0.0155402	1.206	0.779518	99.4079	1.18967	99.595	1.46769	104.094	22.9297	99.4079	1.18967	NA
-16MR01 Spot 142	1244.7	13029.1	2.25474	19.3259	1.24658	0.110844	1.49393	0.0155432	0.823324	0.551112	99.4271	0.812326	106.737	1.51363	273.092	28.5841	99.4271	0.812326	NA
-16MR01 Spot 255	1290.97	31552.9	2.50552	20.4137	0.846452	0.104973	1.52521	0.0155484	1.26877	0.831867	99.4603	1.25224	101.356	1.47124	146.196	19.8298	99.4603	1.25224	NA
-16MR01 Spot 10	763.289	29900.5	3.13663	21.1058	1.12236	0.101605	1.57458	0.0155597	1.10435	0.701364	99.532	1.09074	98.2564	1.47462	67.432	26.6925	99.532	1.09074	NA
-16MR01 Spot 268	366.875	6616.8	2.4477	22.0968	2.78504	0.0971425	3.08122	0.0155749	1.31814	0.427796	99.6285	1.30314	94.1352	2.77013	NA	NA	99.6285	1.30314	NA
-16MR01 Spot 249	1907.99	48907.6	0.851277	21.0593	0.763738	0.102248	1.37545	0.0156237	1.14392	0.831673	99.9383	1.1344	98.8489	1.29553	72.6291	18.1451	99.9383	1.1344	NA
-16MR01 Spot 115	748.932	24412.6	1.80341	20.5939	1.16315	0.10476	1.71288	0.0156538	1.2574	0.734084	100.129	1.2493	101.161	1.64924	125.502	27.3814	100.129	1.2493	NA
-16MR01 Spot 169	961.832	11272.5	2.48288	21.2642	1.01744	0.101521	1.5577	0.0156636	1.17951	0.757212	100.191	1.17263	98.179	1.45772	49.6019	24.2939	100.191	1.17263	NA
-16MR01 Spot 29	935.467	16385.4	2.46149	20.848	0.99045	0.103598	1.37335	0.0156712	0.951368	0.692735	100.24	0.946272	100.092	1.30904	96.5819	23.4412	100.24	0.946272	NA
-16MR01 Spot 39	1671.34	57566.1	1.88137	20.8242	0.835741	0.103825	1.27341	0.0156877	0.960789	0.7545	100.344	0.95663	100.301	1.21619	99.295	19.7953	100.344	0.95663	NA
-16MR01 Spot 236	918.552	3566.57	2.63333	12.9174	4.9894	0.168894	5.41844	0.0158299	2.11313	0.389988	101.247	2.12276	158.458	7.94971	1131.01	99.4335	101.247	2.12276	NA
-16MR01 Spot 116	402.235	27473.3	2.42203	20.775	1.19775	0.105523	1.71235	0.0159066	1.22373	0.714653	101.733	1.23518	101.862	1.6596	104.848	28.3195	101.733	1.23518	NA
-16MR01 Spot 264	1093.01	16050	1.40957	21.1466	1.1448	0.103935	1.65545	0.0159473	1.19581	0.722346	101.992	1.21003	100.402	1.58257	62.8016	27.2869	101.992	1.21003	NA
-16MR01 Spot 101	2345.8	79494.1	1.42758	21.1065	1.00314	0.104334	1.56254	0.0159783	1.19802	0.766709	102.188	1.21458	100.769	1.49896	67.3542	23.8736	102.188	1.21458	NA
-16MR01 Spot 45	1053.08	28388.8	2.33016	20.596	1.02851	0.107159	1.64542	0.016014	1.28436	0.780565	102.415	1.30499	103.363	1.61706	125.257	24.2303	102.415	1.30499	NA
-16MR01 Spot 299	2471.01	62915.1	3.17851	20.3979	0.82098	0.108301	1.34832	0.016029	1.06955	0.793252	102.51	1.08773	104.41	1.33782	147.99	19.2254	102.51	1.08773	NA
-16MR01 Spot 119	328.694	14819.3	2.8883	21.4654	1.34917	0.103045	1.81518	0.0160492	1.21435	0.668994	102.639	1.23652	99.5832	1.72181	27.0165	32.3561	102.639	1.23652	NA
-16MR01 Spot 187	1537.97	30005.1	2.41989	20.6434	0.958822	0.107574	1.52975	0.016113	1.19197	0.779192	103.043	1.21848	103.744	1.50863	119.846	22.6048	103.043	1.21848	NA
-16MR01 Spot 166	650.271	12113.4	2.01787	19.4758	1.45946	0.114144	1.81391	0.01613	1.07715	0.593828	103.151	1.10225	109.749	1.88694	255.356	33.5473	103.151	1.10225	NA
-16MR01 Spot 285	388.775	11835.3	2.10622	19.6084	1.10692	0.113502	1.51251	0.0161486	1.03074	0.681475	103.269	1.05595	109.164	1.56546	239.753	25.4992	103.269	1.05595	NA
-16MR01 Spot 102	663.67	75534.5	2.09301	21.0533	1.12753	0.106025	1.72719	0.0161964	1.30838	0.75752	103.572	1.34429	102.323	1.68119	73.3068	26.8048	103.572	1.34429	NA
-16MR01 Spot 163	626.181	13171.3	4.2357	21.3653	1.13772	0.104517	1.71539	0.0162025	1.2838	0.748402	103.611	1.31953	100.937	1.64819	38.2149	27.2319	103.611	1.31953	NA
-16MR01 Spot 97	1091.72	105193	1.94898	18.8825	1.90368	0.118824	2.25576	0.01628	1.21015	0.53647	104.102	1.24967	114.006	2.43258	326.031	43.1962	104.102	1.24967	NA
-16MR01 Spot 176	647.219	9401.1	2.26934	21.489	1.29237	0.105723	1.71331	0.0164844	1.12483	0.656521	105.399	1.17592	102.046	1.66338	24.4095	30.9911	105.399	1.17592	NA
-16MR01 Spot 165	792.816	46228	2.76925	20.994	1.02879	0.10826	1.8252	0.0164911	1.50763	0.826009	105.442	1.57674	104.373	1.81037	80.0111	24.4252	105.442	1.57674	NA
-16MR01 Spot 205	1499.72	61286.9	2.59535	20.2327	1.07289	0.112497	1.49179	0.0165151	1.03651	0.694808	105.594	1.08557	108.247	1.53172	166.996	25.071	105.594	1.08557	NA
-16MR01 Spot 147	1049.72	23381.4	1.67179	20.7042	0.931262	0.110828	1.43756	0.0166493	1.09513	0.761803	106.444	1.15614	106.722	1.45632	112.949	21.9881	106.444	1.15614	NA
-16MR01 Spot 314	322.716	12659.6	1.36583	20.7545	1.46648	0.11083	1.82398	0.01669	1.0846	0.594634	106.703	1.14777	106.724	1.84782	107.227	34.6275	106.703	1.14777	NA
-16MR01 Spot 56	189.123	2421.42	1.31949	21.2495	1.99916	0.109323	2.39981	0.0168558	1.32757	0.553199	107.754	1.41862	105.346	2.40138	51.2237	47.737	107.754	1.41862	NA
-16MR01 Spot 276	607.046	8001.02	2.65446	21.4341	1.01986	0.109211	1.37176	0.0169847	0.917391	0.66877	108.571	0.987682	105.243	1.37138	30.5416	24.4448	108.571	0.987682	NA
-16MR01 Spot 117	562.336	11066.5	3.01784	21.0471	1.05023	0.111609	1.70693	0.0170442	1.3456	0.788313	108.948	1.45369	107.436	1.74018	74.0471	24.9673	108.948	1.45369	NA
-16MR01 Spot 253	2063.39	19932.2	1.44783	20.7921	0.606896	0.11322	1.20813	0.0170808	1.04463	0.864668	109.18	1.13093	108.906	1.24763	102.925	14.3485	109.18	1.13093	NA
-16MR01 Spot 189	825.532	28441.7	0.889338	21.0464	1.15268	0.112026	1.76971	0.0171075	1.34284	0.758788	109.349	1.456	107.817	1.81025	74.1022	27.417	109.349	1.456	NA
-16MR01 Spot 256	1490.42	801398	1.5819	20.8065	0.990398	0.113362	1.45353	0.0171141	1.06389	0.731934	109.391	1.15398	109.036	1.50274	101.264	23.4228	109.391	1.15398	NA
-16MR01 Spot 128	634.812	35310.3	2.04338	19.8533	1.00174	0.119351	1.43377	0.0171928	1.02577	0.715437	109.89	1.11766	114.484	1.55228	211.074	23.2389	109.89	1.11766	NA
-16MR01 Spot 43	426.345	16382.9	2.82327	19.1258	2.39635	0.124234	2.61774	0.0172405	1.05359	0.402482	110.192	1.15111	118.904	2.93726	296.915	54.6895	110.192	1.15111	NA
-16MR01 Spot 195	372.119	4486.45	2.16197	21.3197	1.47004	0.111871	2.2831	0.0173056	1.74687	0.76513	110.605	1.91564	107.675	2.33249	43.3711	35.1463	110.605	1.91564	NA
-16MR01 Spot 310	1427.36	10523.7	5.92608	19.9969	1.56564	0.119956	1.95103	0.0174049	1.16418	0.596698	111.234	1.28385	115.032	2.12186	194.368	36.3775	111.234	1.28385	NA
-16MR01 Spot 288	760.567	85495	2.03108	20.3251	1.05944	0.118816	1.57996	0.0175225	1.17211	0.741864	111.979	1.30119	113.998	1.70369	156.353	24.7788	111.979	1.30119	NA
-16MR01 Spot 14	667.011	10689.7	2.24029	20.6872	0.946169	0.116751	1.64058	0.0175247	1.34025	0.816937	111.993	1.48802	112.122	1.74154	114.851	22.3214	111.993	1.48802	NA
-16MR01 Spot 274	833.708	32272.2	1.8436	19.1191	0.99584	0.127215	1.7879	0.017648	1.48489	0.83052	112.774	1.66	121.592	2.04883	297.722	22.7427	112.774	1.66	NA
-16MR01 Spot 297	305.711	11707	2.47258	18.7139	1.92703	0.13008	2.2554	0.0176629	1.17192	0.519607	112.868	1.31122	124.17	2.63606	346.382	43.5908	112.868	1.31122	NA
-16MR01 Spot 104	318.009	10454.2	2.09554	20.0486	1.53485	0.126852	2.25743	0.018453	1.65537	0.733297	117.871	1.93348	121.265	2.58033	188.317	35.7425	117.871	1.93348	NA
-16MR01 Spot 177	170.982	6796.3	5.70345	21.7085	1.96398	0.130286	2.37376	0.0205218	1.33323	0.561656	130.953	1.72829	124.355	2.77828	NA	NA	130.953	1.72829	NA
-16MR01 Spot 271	450.57	49925.9	1.69253	18.7099	1.21017	0.175334	1.62777	0.0238027	1.08865	0.668794	151.644	1.6316	164.038	2.46564	346.888	27.3489	151.644	1.6316	NA
-16MR01 Spot 303	619.676	75336.9	1.02407	19.7785	0.847911	0.173285	1.39743	0.024868	1.11079	0.794881	158.349	1.73749	162.266	2.09564	219.796	19.6091	158.349	1.73749	NA
-16MR01 Spot 278	76.8192	3819.32	2.48091	21.9687	3.26002	0.156601	3.45853	0.0249625	1.15487	0.333919	158.943	1.81314	147.724	4.75484	NA	NA	158.943	1.81314	NA
-16MR01 Spot 161	495.264	28357.8	1.77779	20.1435	1.29422	0.171398	1.87436	0.0250511	1.35581	0.723345	159.5	2.13598	160.631	2.78474	177.318	30.2016	159.5	2.13598	NA
-16MR01 Spot 159	987.619	10883.1	1.68813	20.108	0.92459	0.177219	2.02506	0.0258564	1.80166	0.889685	164.563	2.92734	165.665	3.09544	181.421	21.5445	164.563	2.92734	NA
-16MR01 Spot 9	236.539	19520	2.98885	20.6778	1.53201	0.175488	2.02538	0.0263294	1.3248	0.654099	167.534	2.19089	164.171	3.0702	115.914	36.1572	167.534	2.19089	NA
-16MR01 Spot 114	681.474	360285	1.56504	20.2351	0.862527	0.180342	1.34376	0.0264783	1.0304	0.766807	168.47	1.71343	168.355	2.08468	166.72	20.13	168.47	1.71343	NA
-16MR01 Spot 242	657.687	89981.5	3.50947	20.1925	1.01531	0.181398	1.58101	0.0265773	1.21192	0.766545	169.091	2.02261	169.263	2.46492	171.642	23.7225	169.091	2.02261	NA
-16MR01 Spot 8	114.615	14083.3	1.88498	20.7013	2.03699	0.178612	2.29353	0.0268284	1.05402	0.459563	170.668	1.77527	166.865	3.52919	113.271	48.0509	170.668	1.77527	NA
-16MR01 Spot 260	1716.03	79649.7	1.48192	19.913	0.861341	0.186378	1.38838	0.0269289	1.0889	0.784292	171.299	1.84071	173.534	2.21468	204.086	20.0006	171.299	1.84071	NA
-16MR01 Spot 95	521.018	9145.87	2.57968	20.928	1.10457	0.177923	1.6443	0.0270177	1.21805	0.740773	171.856	2.06564	166.272	2.5219	87.5246	26.1923	171.856	2.06564	NA
-16MR01 Spot 252	182.328	13846.1	2.09293	19.7021	1.57944	0.190599	1.99765	0.0272471	1.2231	0.61227	173.296	2.09134	177.14	3.24717	228.739	36.4664	173.296	2.09134	NA
-16MR01 Spot 227	289.777	78094.5	1.89455	18.7761	1.52113	0.204278	1.92236	0.02783	1.17543	0.61145	176.953	2.05166	188.739	3.31101	338.898	34.4495	176.953	2.05166	NA
-16MR01 Spot 261	382.567	34890	2.21655	20.1965	1.18621	0.196257	1.94009	0.0287599	1.53521	0.791308	182.782	2.76669	181.954	3.23187	171.184	27.7053	182.782	2.76669	NA
-16MR01 Spot 60	728.843	19050.8	1.82049	20.174	1.1571	0.196663	1.86084	0.0287875	1.45734	0.783163	182.955	2.62879	182.299	3.10521	173.781	27.0012	182.955	2.62879	NA
-16MR01 Spot 262	286.478	64297.7	2.30354	19.8095	1.32753	0.200559	1.91858	0.0288273	1.38513	0.721958	183.204	2.5019	185.599	3.25438	216.177	30.7536	183.204	2.5019	NA
-16MR01 Spot 233	714.254	48173.8	1.46553	19.7943	0.797134	0.201199	1.45804	0.0288971	1.22084	0.837318	183.642	2.21035	186.14	2.47977	217.943	18.4615	183.642	2.21035	NA
-16MR01 Spot 145	657.354	86045.2	1.15114	19.5908	1.03254	0.206457	2.20658	0.0293474	1.95009	0.883762	186.463	3.58411	190.575	3.83415	241.828	23.8092	186.463	3.58411	NA
-16MR01 Spot 24	645.659	18407.4	4.04597	20.1134	1.25483	0.203512	1.71483	0.0297005	1.16878	0.681574	188.674	2.17323	188.094	2.94438	180.797	29.2507	188.674	2.17323	NA
-16MR01 Spot 96	119.966	23905.7	1.9562	19.4274	1.48773	0.211326	1.85604	0.029789	1.10975	0.597915	189.228	2.06944	194.665	3.28784	261.078	34.1586	189.228	2.06944	NA
-16MR01 Spot 105	324.351	286420	2.7121	19.8923	1.24954	0.206639	1.6608	0.0298254	1.09404	0.658741	189.455	2.04256	190.729	2.88792	206.522	29.0004	189.455	2.04256	NA
-16MR01 Spot 254	1454.09	221992	2.15364	19.8262	0.935062	0.20744	1.50936	0.0298415	1.18484	0.784991	189.556	2.21323	191.402	2.63301	214.253	21.6523	189.556	2.21323	NA
-16MR01 Spot 134	377.283	8673.76	2.55265	20.5054	1.25291	0.200671	1.77384	0.0298566	1.25567	0.707885	189.651	2.34671	185.694	3.01027	135.637	29.4433	189.651	2.34671	NA
-16MR01 Spot 5	127.952	4567.36	2.41222	20.7759	1.49769	0.198916	1.64402	0.0299859	0.678036	0.412426	190.46	1.2725	184.209	2.76961	104.768	35.3983	190.46	1.2725	NA
-16MR01 Spot 238	1181.83	41079.2	2.59668	19.4099	0.704358	0.213074	1.23598	0.0300083	1.01564	0.821729	190.6	1.90748	196.129	2.20438	263.171	16.1781	190.6	1.90748	NA
-16MR01 Spot 218	404.902	32505.6	2.01965	19.1792	1.05629	0.217221	1.37811	0.0302288	0.885116	0.642269	191.98	1.6742	199.595	2.49717	290.526	24.1375	191.98	1.6742	NA
-16MR01 Spot 136	841.062	32682.9	3.68895	20.2098	0.857832	0.20685	1.44325	0.0303324	1.16064	0.804187	192.628	2.20265	190.906	2.51174	169.64	20.0527	192.628	2.20265	NA
-16MR01 Spot 183	387.891	57071.1	2.50676	19.9008	0.771959	0.210546	1.48469	0.0304023	1.26822	0.854199	193.065	2.4122	194.011	2.622	205.519	17.9084	193.065	2.4122	NA
-16MR01 Spot 286	372.685	24285.7	2.69392	19.915	1.4555	0.210568	1.68569	0.0304271	0.850331	0.504442	193.221	1.61864	194.029	2.97722	203.85	33.7958	193.221	1.61864	NA
-16MR01 Spot 289	417.569	112005	1.77776	20.0304	1.10597	0.210335	1.70703	0.0305695	1.30031	0.761736	194.112	2.48643	193.833	3.01216	190.467	25.7454	194.112	2.48643	NA
-16MR01 Spot 270	275.493	59760.5	5.01217	19.964	1.67887	0.21107	2.3117	0.0305747	1.58914	0.687435	194.144	3.03923	194.45	4.09093	198.195	39.0049	194.144	3.03923	NA
-16MR01 Spot 51	621.669	17977.5	3.192	20.1059	1.00628	0.209608	1.9792	0.0305788	1.7043	0.861104	194.17	3.25989	193.224	3.48245	181.663	23.4487	194.17	3.25989	NA
-16MR01 Spot 138	1073.63	93195	4.56197	20.1104	0.815047	0.210633	1.35801	0.0307351	1.08622	0.799866	195.148	2.08797	194.084	2.39909	181.149	18.993	195.148	2.08797	NA
-16MR01 Spot 250	214.151	4007.5	3.03183	21.1506	1.51523	0.20057	1.87506	0.0307805	1.1045	0.589049	195.431	2.12615	185.608	3.18072	62.3579	36.1096	195.431	2.12615	NA
-16MR01 Spot 87	1570.83	48126.8	1.68227	19.8357	0.615642	0.213956	1.24727	0.0307935	1.08474	0.869694	195.512	2.08897	196.867	2.23209	213.149	14.2674	195.512	2.08897	NA
-16MR01 Spot 130	169.991	7858.06	2.00279	20.952	2.12733	0.202572	2.55506	0.0307958	1.41521	0.553884	195.527	2.72557	187.3	4.37021	84.7637	50.4752	195.527	2.72557	NA
-16MR01 Spot 77	195.401	7312.72	2.67287	20.0961	1.38358	0.211217	1.62987	0.0307984	0.86151	0.528575	195.543	1.65933	194.573	2.88597	182.806	32.2217	195.543	1.65933	NA
-16MR01 Spot 283	163.117	24238.7	2.21447	19.3843	1.29153	0.219267	1.6835	0.0308398	1.07988	0.641445	195.802	2.08263	201.3	3.07411	266.204	29.633	195.802	2.08263	NA
-16MR01 Spot 174	217.193	26473.5	1.08255	19.5731	1.29896	0.218702	1.72485	0.0310598	1.13481	0.657921	197.178	2.20373	200.829	3.14295	243.925	29.904	197.178	2.20373	NA
-16MR01 Spot 208	254.418	27376.3	3.65744	18.917	1.25541	0.226844	1.54031	0.0311363	0.892467	0.579406	197.656	1.73725	207.59	2.89186	321.933	28.5282	197.656	1.73725	NA
-16MR01 Spot 301	252.122	13369.7	3.87924	18.1305	2.23564	0.236977	2.49455	0.0311747	1.10666	0.443629	197.896	2.15675	215.942	4.85254	417.549	49.965	197.896	2.15675	NA
-16MR01 Spot 168	588.956	38802	2.08802	19.5621	1.00033	0.220545	1.57674	0.031304	1.2188	0.772984	198.704	2.38486	202.363	2.89291	245.203	23.0222	198.704	2.38486	NA
-16MR01 Spot 23	418.196	275273	3.03176	19.9668	1.30298	0.216203	1.70563	0.0313225	1.10065	0.645303	198.82	2.15491	198.744	3.07872	197.847	30.2884	198.82	2.15491	NA
-16MR01 Spot 113	624.091	27554.7	3.34614	19.9686	1.10702	0.216556	1.61528	0.0313766	1.17629	0.728224	199.158	2.30685	199.039	2.91956	197.631	25.7291	199.158	2.30685	NA
-16MR01 Spot 94	681.155	20990.2	1.81392	20.012	0.966707	0.216198	1.38819	0.0313929	0.996273	0.717675	199.26	1.95481	198.741	2.5057	192.606	22.4978	199.26	1.95481	NA
-16MR01 Spot 127	865.188	62003.6	1.78311	19.8844	0.884726	0.219777	1.2862	0.031709	0.93358	0.725843	201.235	1.84967	201.725	2.35311	207.428	20.5346	201.235	1.84967	NA
-16MR01 Spot 239	654.91	26547.2	3.60314	20.0359	0.853227	0.218452	1.34561	0.031758	1.04051	0.773266	201.542	2.06463	200.621	2.44961	189.829	19.8521	201.542	2.06463	NA
-16MR01 Spot 75	672.204	42988	2.09235	19.7777	0.809471	0.221489	1.41833	0.0317844	1.16466	0.821145	201.707	2.31282	203.148	2.61138	219.907	18.7178	201.707	2.31282	NA
-16MR01 Spot 203	235.59	44750.5	2.68467	20.102	1.23652	0.218216	1.64949	0.0318283	1.09171	0.66185	201.981	2.17087	200.424	3.00015	182.118	28.8194	201.981	2.17087	NA
-16MR01 Spot 48	273.44	9519.84	6.21052	20.5542	1.43474	0.213933	2.07229	0.0319056	1.49531	0.72157	202.464	2.98041	196.848	3.70823	130.038	33.7441	202.464	2.98041	NA
-16MR01 Spot 59	365.904	26356.6	1.84349	19.805	1.16922	0.223372	1.40384	0.032099	0.776976	0.553465	203.672	1.55774	204.713	2.60267	216.716	27.0708	203.672	1.55774	NA
-16MR01 Spot 133	249.577	26093.2	1.85496	20.1684	1.07879	0.219349	1.46523	0.0320993	0.991507	0.676693	203.674	1.98787	201.368	2.67635	174.432	25.1641	203.674	1.98787	NA
-16MR01 Spot 204	368.356	60265.7	3.50566	20.1063	1.331	0.221222	1.78593	0.0322736	1.1908	0.666764	204.763	2.39998	202.926	3.28496	181.621	31.0054	204.763	2.39998	NA
-16MR01 Spot 38	160.712	11297.1	7.17843	20.3637	1.45436	0.222109	1.99171	0.0328179	1.3608	0.683229	208.161	2.7874	203.664	3.67549	151.928	34.071	208.161	2.7874	NA
-16MR01 Spot 129	302.868	40383.6	1.69817	19.6858	1.13238	0.234531	1.42748	0.0334998	0.869142	0.608865	212.415	1.81611	213.933	2.75359	230.644	26.1402	212.415	1.81611	NA
-16MR01 Spot 305	126.36	9197.96	3.07825	19.3199	1.67528	0.239116	2.15068	0.0335198	1.34864	0.627078	212.54	2.81966	217.697	4.2141	273.812	38.3837	212.54	2.81966	NA
-16MR01 Spot 99	254.082	18012	2.74767	19.3413	1.45038	0.23891	1.70944	0.0335279	0.904763	0.529274	212.591	1.89207	217.527	3.34719	271.273	33.2472	212.591	1.89207	NA
-16MR01 Spot 179	258.827	21903.5	3.07955	20.0617	1.24076	0.231306	1.60783	0.0336699	1.02257	0.635992	213.476	2.14719	211.276	3.06685	186.792	28.8746	213.476	2.14719	NA
-16MR01 Spot 21	358.398	22749.9	3.12174	20.1322	1.16449	0.231649	1.50201	0.0338383	0.948676	0.631605	214.526	2.00167	211.559	2.86845	178.625	27.1337	214.526	2.00167	NA
-16MR01 Spot 71	1170.11	303731	3.59034	19.6109	0.871038	0.240833	1.6676	0.034269	1.42204	0.852744	217.211	3.03737	219.103	3.28645	239.474	20.0679	217.211	3.03737	NA
-16MR01 Spot 74	200.555	9620.14	3.05383	20.3879	1.35398	0.233462	1.73739	0.0345363	1.0887	0.62663	218.877	2.34292	213.053	3.33903	149.118	31.7318	218.877	2.34292	NA
-16MR01 Spot 32	204.678	116411	3.21717	19.7752	1.13047	0.240715	1.44186	0.034539	0.894984	0.620716	218.894	1.92618	219.006	2.84043	220.18	26.157	218.894	1.92618	NA
-16MR01 Spot 298	134.818	9258.64	1.96091	19.7366	1.73917	0.242018	1.95654	0.0346583	0.896288	0.458099	219.638	1.93543	220.071	3.87115	224.71	40.225	219.638	1.93543	NA
-16MR01 Spot 15	376.275	11453.8	3.03197	20.5878	1.51303	0.233387	1.79201	0.0348638	0.960216	0.535833	220.917	2.08535	212.991	3.44309	126.245	35.6027	220.917	2.08535	NA
-16MR01 Spot 88	600.814	17071.3	3.8361	20.2093	0.969256	0.244686	1.41482	0.0358798	1.03065	0.728472	227.243	2.30129	222.251	2.82411	169.698	22.6381	227.243	2.30129	NA
-16MR01 Spot 83	312.111	65158.4	1.9852	19.6658	1.10197	0.251515	1.53197	0.0358891	1.06423	0.694681	227.301	2.37686	227.806	3.12614	233.044	25.4367	227.301	2.37686	NA
-16MR01 Spot 149	286.772	20426.8	1.65537	19.9231	1.08262	0.248639	1.41377	0.035943	0.909223	0.643118	227.636	2.03361	225.47	2.85853	202.945	25.151	227.636	2.03361	NA
-16MR01 Spot 85	316.444	14535.8	3.04281	20.204	1.39192	0.24831	1.67209	0.0364015	0.926514	0.554106	230.489	2.09779	225.203	3.37724	170.317	32.5123	230.489	2.09779	NA
-16MR01 Spot 257	71.1134	26851.1	2.38359	17.2659	2.85697	0.294331	3.19294	0.0368735	1.42568	0.446511	233.424	3.26835	261.963	7.37257	525.711	62.6555	233.424	3.26835	NA
-16MR01 Spot 150	295.553	38065.4	2.661	19.4038	0.994706	0.280532	1.63555	0.0394963	1.2983	0.7938	249.71	3.18	251.08	3.63821	263.918	22.822	249.71	3.18	NA
-16MR01 Spot 110	1062.95	65230	2.29452	18.9428	0.95616	0.290831	2.43454	0.0399736	2.23892	0.919647	252.67	5.54764	259.214	5.5696	318.789	21.734	252.67	5.54764	NA
-16MR01 Spot 221	2178.77	168246	1.8588	19.0733	0.743681	0.294253	1.3847	0.0407226	1.16805	0.843539	257.31	2.94632	261.901	3.19661	303.195	16.9582	257.31	2.94632	NA
-16MR01 Spot 3	1207	292336	1.24269	19.4064	0.89984	0.290171	1.49619	0.0408588	1.19536	0.798933	258.154	3.02489	258.694	3.41685	263.565	20.6569	258.154	3.02489	NA
-16MR01 Spot 287	702.012	45506.9	2.81174	19.586	1.03133	0.2889	1.46191	0.0410564	1.03612	0.708742	259.378	2.63411	257.693	3.32721	242.368	23.7572	259.378	2.63411	NA
-16MR01 Spot 275	245.913	135857	14.7212	19.4637	1.29597	0.292112	1.5684	0.0412537	0.883377	0.563234	260.599	2.25616	260.221	3.6003	256.8	29.7657	260.599	2.25616	NA
-16MR01 Spot 132	397.953	12462.8	4.3413	19.9719	0.892865	0.289178	1.56442	0.0419057	1.28461	0.821137	264.635	3.33069	257.912	3.56319	197.224	20.757	264.635	3.33069	NA
-16MR01 Spot 18	794.877	72693.7	1.96724	18.8761	0.800053	0.317179	1.31058	0.0434414	1.03805	0.792051	274.129	2.78594	279.73	3.20447	326.809	18.1563	274.129	2.78594	NA
-16MR01 Spot 248	421.538	81631.4	3.96542	7.91022	5.95396	0.804919	6.19673	0.0461986	1.71749	0.277161	291.141	4.88908	599.6	28.0671	2047.97	105.281	291.141	4.88908	NA
-16MR01 Spot 229	537.301	507891	1.10356	18.7527	0.884867	0.383603	1.30873	0.0521956	0.964248	0.736784	327.987	3.0835	329.686	3.68427	341.708	20.0092	327.987	3.0835	NA
-16MR01 Spot 65	256.992	14219.1	1.73599	18.6486	1.0813	0.387521	1.84165	0.052436	1.49079	0.809489	329.46	4.78817	332.557	5.22271	354.303	24.4244	329.46	4.78817	NA
-16MR01 Spot 54	391.901	16913.5	1.24448	18.971	1.24616	0.38479	1.49517	0.0529667	0.826201	0.552581	332.71	2.67912	330.556	4.21854	315.406	28.3223	332.71	2.67912	NA
-16MR01 Spot 263	190.235	7160.37	1.82194	18.7518	0.988868	0.392983	1.88913	0.0534694	1.60964	0.852055	335.786	5.26661	336.546	5.41157	341.798	22.3644	335.786	5.26661	NA
-16MR01 Spot 135	374.872	116450	1.46107	18.4148	0.79953	0.401899	1.16646	0.0536998	0.849343	0.728136	337.196	2.79034	343.025	3.39549	382.681	17.9696	337.196	2.79034	NA
-16MR01 Spot 196	244.469	39395	1.83218	18.8314	0.998093	0.399063	1.51716	0.0545269	1.14262	0.753132	342.254	3.80868	340.968	4.39408	332.187	22.6344	342.254	3.80868	NA
-16MR01 Spot 213	250.65	12894.8	2.15634	19.3727	1.08238	0.388832	1.56715	0.0546563	1.13331	0.72317	343.046	3.78615	333.516	4.45507	267.546	24.8228	343.046	3.78615	NA
-16MR01 Spot 1	385.301	59669.9	1.603	19.0549	0.862064	0.396622	1.29789	0.0548365	0.970238	0.747551	344.147	3.25148	339.195	3.74255	305.415	19.6295	344.147	3.25148	NA
-16MR01 Spot 40	135.153	10523.5	1.92372	18.4901	1.59112	0.415548	2.18411	0.0557505	1.49622	0.685047	349.73	5.09331	352.862	6.51038	373.503	35.8198	349.73	5.09331	NA
-16MR01 Spot 178	388.917	21035.6	2.73631	18.9556	1.0401	0.406064	1.90462	0.0558495	1.59555	0.837724	350.334	5.44058	346.036	5.58511	317.257	23.6383	350.334	5.44058	NA
-16MR01 Spot 207	682.786	109447	5.00713	18.8248	0.967518	0.410783	1.46041	0.0561089	1.09395	0.749066	351.918	3.7466	349.439	4.31779	333.012	21.9402	351.918	3.7466	NA
-16MR01 Spot 220	2018.7	99997.5	3.88916	18.481	0.610715	0.419341	1.1961	0.0562316	1.02844	0.859825	352.667	3.52953	355.579	3.58822	374.613	13.7457	352.667	3.52953	NA
-16MR01 Spot 184	1271.99	86153.7	1.39632	18.6768	0.764993	0.415266	1.47689	0.0562752	1.26332	0.855395	352.933	4.33883	352.66	4.40016	350.855	17.2832	352.933	4.33883	NA
-16MR01 Spot 162	320.819	16086.9	1.79182	18.1715	0.998571	0.427077	1.41071	0.0563099	0.996479	0.706365	353.145	3.42436	361.099	4.28677	412.495	22.326	353.145	3.42436	NA
-16MR01 Spot 158	231.327	30637.7	2.20103	18.8191	0.865963	0.413763	1.27739	0.0564988	0.939066	0.735142	354.298	3.23731	351.582	3.79605	333.66	19.6406	354.298	3.23731	NA
-16MR01 Spot 90	826.712	152246	2.48496	18.6952	0.960931	0.416582	1.56744	0.056509	1.23834	0.790039	354.36	4.26976	353.604	4.68041	348.666	21.7084	354.36	4.26976	NA
-16MR01 Spot 234	861.448	2.12139e+06	1.68802	18.4757	0.728843	0.423034	1.17254	0.0567104	0.918504	0.783342	355.589	3.17765	358.218	3.53933	375.265	16.4022	355.589	3.17765	NA
-16MR01 Spot 66	292.305	311422	2.73483	18.1725	0.865093	0.430738	1.11947	0.0567956	0.710518	0.634689	356.108	2.4616	363.7	3.42215	412.376	19.3421	356.108	2.4616	NA
-16MR01 Spot 309	621.133	74670.6	1.64441	18.7235	0.776883	0.418513	1.3125	0.056857	1.05788	0.806005	356.483	3.6688	354.987	3.93195	345.216	17.5617	356.483	3.6688	NA
-16MR01 Spot 244	381.406	56252.8	0.892423	18.3542	0.944819	0.427192	1.41585	0.0568914	1.0545	0.744777	356.693	3.65914	361.181	4.3032	390.085	21.2071	356.693	3.65914	NA
-16MR01 Spot 188	550.005	1.14464e+06	1.86459	18.6372	0.821674	0.421072	1.8178	0.056941	1.6215	0.89201	356.995	5.6313	356.818	5.46916	355.663	18.5424	356.995	5.6313	NA
-16MR01 Spot 217	914.581	65921	0.589067	18.4729	0.725484	0.427832	1.33557	0.057345	1.12135	0.839603	359.459	3.92047	361.636	4.06346	375.602	16.3253	359.459	3.92047	NA
-16MR01 Spot 181	659.642	25518.4	1.97277	18.7044	0.736273	0.422895	1.26586	0.0573935	1.02972	0.813449	359.755	3.60298	358.119	3.82013	347.513	16.6394	359.755	3.60298	NA
-16MR01 Spot 76	289.599	27822.9	1.95438	18.5487	0.917118	0.42806	1.26529	0.0576111	0.871692	0.688928	361.081	3.06099	361.798	3.85105	366.376	20.6491	361.081	3.06099	NA
-16MR01 Spot 57	497.278	56609.1	2.358	18.5692	0.910572	0.429018	1.59518	0.0578038	1.30976	0.821071	362.255	4.61382	362.479	4.86275	363.888	20.5303	362.255	4.61382	NA
-16MR01 Spot 37	518.668	34981.6	2.12982	18.3581	0.822657	0.434257	1.29831	0.0578445	1.00442	0.773632	362.503	3.54056	366.195	3.99146	389.614	18.4661	362.503	3.54056	NA
-16MR01 Spot 198	419.871	1.97506e+06	1.65251	18.4106	0.69129	0.433026	1.50643	0.0578456	1.33845	0.888492	362.51	4.71811	365.323	4.62212	383.192	15.5345	362.51	4.71811	NA
-16MR01 Spot 53	466.823	195542	1.66455	18.7873	0.750029	0.425719	1.52398	0.0580331	1.32664	0.87051	363.653	4.69082	360.132	4.62064	337.492	16.9803	363.653	4.69082	NA
-16MR01 Spot 226	320.037	15290.9	2.68727	19.0782	1.00985	0.420085	1.22511	0.0581516	0.693615	0.566166	364.375	2.45726	356.112	3.67984	302.624	23.0004	364.375	2.45726	NA
-16MR01 Spot 22	405.508	17843.5	2.05795	18.9354	1.00696	0.424929	1.59145	0.0583818	1.23237	0.774372	365.777	4.38223	359.569	4.8189	319.726	22.8737	365.777	4.38223	NA
-16MR01 Spot 296	619.888	42128.8	1.7776	18.7428	0.658078	0.431983	1.32282	0.0587475	1.14751	0.867474	368.004	4.10461	364.583	4.05192	342.908	14.8885	368.004	4.10461	NA
-16MR01 Spot 294	436.877	32972.8	2.85508	18.3642	0.917914	0.442819	1.25362	0.0590047	0.85381	0.681077	369.57	3.06668	372.239	3.90672	388.865	20.6074	369.57	3.06668	NA
-16MR01 Spot 42	336.107	15597.7	1.95475	18.3765	0.798223	0.443045	1.4925	0.0590743	1.26111	0.844964	369.994	4.53465	372.398	4.65281	387.36	17.9248	369.994	4.53465	NA
-16MR01 Spot 295	222.178	11940.6	1.57706	17.3727	1.07613	0.469885	1.38528	0.0592307	0.872326	0.62971	370.945	3.14451	391.109	4.49655	512.151	23.6542	370.945	3.14451	NA
-16MR01 Spot 269	663.27	95289.4	1.72056	18.4502	0.686508	0.445306	1.32895	0.0596138	1.1379	0.85624	373.276	4.12688	373.987	4.15757	378.37	15.4402	373.276	4.12688	NA
-16MR01 Spot 225	476.342	48454.9	1.57501	18.4719	0.759082	0.458311	1.23705	0.0614269	0.976778	0.789601	384.298	3.64404	383.083	3.94758	375.728	17.0812	384.298	3.64404	NA
-16MR01 Spot 245	539.009	348941	1.59918	18.4564	0.809524	0.466949	1.35954	0.0625323	1.09225	0.803399	391.007	4.14383	389.079	4.39418	377.611	18.2103	391.007	4.14383	NA
-16MR01 Spot 93	290.319	21650.5	4.0042	17.3081	1.43357	0.510638	1.67997	0.0641283	0.875872	0.521363	400.683	3.40263	418.878	5.76618	520.319	31.4499	400.683	3.40263	77.0072
-16MR01 Spot 100	129.383	11707	1.22293	18.6754	1.33631	0.474317	1.8036	0.0642727	1.2113	0.6716	401.558	4.71566	394.166	5.89185	351.036	30.1802	401.558	4.71566	114.392
-16MR01 Spot 122	1209.95	74991.8	59.1584	18.1168	0.880962	0.510175	1.55123	0.0670639	1.2768	0.823089	418.442	5.17296	418.567	5.3211	419.231	19.6725	418.442	5.17296	99.8118
-16MR01 Spot 81	91.2456	13279.5	2.18666	18.2688	1.46941	0.509989	1.66691	0.0676018	0.787034	0.472152	421.691	3.21263	418.442	5.71654	400.547	32.9223	421.691	3.21263	105.279
-16MR01 Spot 175	185.495	2391.38	2.39636	20.4996	6.2846	0.464246	6.37619	0.0690529	1.07687	0.168889	430.447	4.48398	387.207	20.5298	136.292	147.765	430.447	4.48398	315.827
-16MR01 Spot 68	305.534	86020.4	3.09338	18.244	0.988661	0.524792	1.61477	0.0694695	1.27673	0.790657	432.959	5.34618	428.347	5.64316	403.591	22.1386	432.959	5.34618	107.277
-16MR01 Spot 272	187.873	180553	1.60526	16.5581	0.870011	0.806063	1.36937	0.0968428	1.05748	0.772236	595.88	6.01883	600.243	6.20573	616.739	18.8046	595.88	6.01883	96.6179
-16MR01 Spot 98	173.698	46527.7	3.8505	13.442	0.846224	1.8356	1.38467	0.179031	1.096	0.791524	1061.68	10.7283	1058.29	9.10165	1051.31	17.0725	1051.31	17.0725	100.986
-16MR01 Spot 191	499.216	4.88227e+06	3.36697	12.8253	0.774222	2.16287	1.25101	0.201273	0.982655	0.785488	1182.15	10.6136	1169.19	8.68662	1145.28	15.3851	1145.28	15.3851	103.22
-16MR01 Spot 210	335.104	202667	3.85868	12.7538	0.546969	2.1191	1.13347	0.196101	0.992765	0.875862	1154.34	10.4924	1155.04	7.81937	1156.35	10.8493	1156.35	10.8493	99.8263
-16MR01 Spot 27	107.794	30364.2	1.20609	12.3277	0.962901	2.2927	1.35231	0.205077	0.949503	0.702136	1202.54	10.4164	1210.04	9.56122	1223.44	18.9	1223.44	18.9	98.2912
-16MR01 Spot 185	227.597	24310.4	3.25171	12.0975	2.65102	1.1921	2.94109	0.104639	1.2736	0.433037	641.538	7.77722	796.931	16.2415	1260.4	51.7997	1260.4	51.7997	50.8996
-16MR01 Spot 11	144.985	39673.6	3.10382	11.7242	0.912573	2.21126	2.87765	0.18811	2.72912	0.948384	1111.13	27.8547	1184.61	20.1229	1321.36	17.6824	1321.36	17.6824	84.0894
-16MR01 Spot 28	260.345	70749.8	2.2933	11.2234	0.782018	2.92326	1.24786	0.238056	0.972421	0.779271	1376.58	12.0535	1387.95	9.44123	1405.45	14.976	1405.45	14.976	97.9461
-16MR01 Spot 89	196.699	220144	1.70412	10.0223	0.632743	3.95168	1.01873	0.287366	0.798404	0.783724	1628.35	11.4888	1624.34	8.25521	1619.12	11.7766	1619.12	11.7766	100.57
-16MR01 Spot 111	164.203	41679.1	1.17687	10.0106	0.699193	3.84436	1.36527	0.279237	1.17264	0.858908	1587.52	16.5008	1602.09	11.0015	1621.29	13.01	1621.29	13.01	97.9172
-16MR01 Spot 151	120.758	71148	1.53734	9.82795	0.780105	3.92862	1.58933	0.28015	1.38471	0.871251	1592.12	19.5347	1619.6	12.8642	1655.48	14.452	1655.48	14.452	96.1729
-16MR01 Spot 180	541.376	40485.7	3.31834	9.61563	0.729779	4.09958	1.31432	0.286025	1.0931	0.831682	1621.64	15.6723	1654.22	10.7288	1695.83	13.4503	1695.83	13.4503	95.6247
-16MR01 Spot 121	329.968	614220	1.38157	9.43049	0.970998	4.04321	1.40612	0.276661	1.01703	0.723284	1574.53	14.2077	1642.93	11.447	1731.59	17.8165	1731.59	17.8165	90.9297
-16MR01 Spot 108	402.662	75624.9	1.83551	9.3366	0.740998	3.9502	1.15568	0.267606	0.886862	0.767392	1528.64	12.0694	1624.03	9.36433	1749.92	13.5647	1749.92	13.5647	87.3546
-16MR01 Spot 33	409.135	420191	2.7733	9.19687	0.715098	4.73608	1.33029	0.316043	1.12175	0.843232	1770.38	17.3656	1773.65	11.1532	1777.48	13.0457	1777.48	13.0457	99.6002
-16MR01 Spot 182	826.942	1.42651e+07	3.73429	9.17929	0.76074	4.71847	1.40692	0.314266	1.18351	0.841206	1761.67	18.2434	1770.53	11.788	1780.97	13.8726	1780.97	13.8726	98.9162
-16MR01 Spot 277	124.229	33145.1	2.64643	9.03572	0.825043	5.02766	1.34991	0.329622	1.06844	0.791489	1836.55	17.0748	1823.99	11.4333	1809.67	14.9923	1809.67	14.9923	101.485
-16MR01 Spot 64	192.49	65355.9	1.16916	9.0343	0.777048	4.12036	1.56364	0.270096	1.3569	0.86778	1541.29	18.6015	1658.35	12.7769	1809.95	14.1195	1809.95	14.1195	85.1562
-16MR01 Spot 141	296.754	136524	3.25858	9.0086	0.833118	5.08105	1.28588	0.332123	0.979488	0.761727	1848.66	15.7425	1832.95	10.9099	1815.13	15.1289	1815.13	15.1289	101.847
-16MR01 Spot 44	258.257	102869	1.04371	9.00304	0.641674	4.8313	1.18618	0.315603	0.997631	0.841048	1768.22	15.4278	1790.36	9.9791	1816.25	11.6503	1816.25	11.6503	97.3554
-16MR01 Spot 19	290.069	82879.3	1.99357	8.9963	0.571156	4.2678	1.18158	0.278584	1.03437	0.875409	1584.22	14.5285	1687.17	9.72034	1817.61	10.368	1817.61	10.368	87.1599
-16MR01 Spot 80	151.031	70708.3	2.14459	8.96845	0.815779	4.97391	1.48456	0.32367	1.24033	0.835488	1807.63	19.5515	1814.9	12.5513	1823.23	14.7994	1823.23	14.7994	99.1441
-16MR01 Spot 118	92.912	34495	0.878609	8.96352	0.76899	4.81484	1.31568	0.313147	1.06755	0.811407	1756.18	16.4113	1787.49	11.0622	1824.23	13.9487	1824.23	13.9487	96.2694
-16MR01 Spot 306	156.545	73075.4	1.83531	8.92679	0.75766	5.03215	1.28752	0.325939	1.04099	0.808523	1818.67	16.496	1824.75	10.9064	1831.68	13.7326	1831.68	13.7326	99.2898
-16MR01 Spot 160	159.15	60952	2.09381	8.90392	0.76694	5.04373	1.13139	0.325852	0.831773	0.735178	1818.25	13.178	1826.7	9.58742	1836.33	13.8929	1836.33	13.8929	99.0155
-16MR01 Spot 144	205.502	109433	1.50023	8.84236	0.832122	4.502	1.29978	0.288843	0.998498	0.768206	1635.74	14.4254	1731.34	10.7994	1848.88	15.0489	1848.88	15.0489	88.4719
-16MR01 Spot 131	483.799	295586	0.630861	8.8351	0.631332	5.09502	1.24155	0.326622	1.06905	0.861061	1821.99	16.9674	1835.28	10.5386	1850.37	11.415	1850.37	11.415	98.4661
-16MR01 Spot 69	164.412	77736.2	2.98986	8.8172	0.743489	5.22308	1.34138	0.334153	1.11648	0.832337	1858.48	18.0265	1856.39	11.432	1854.03	13.4373	1854.03	13.4373	100.24
-16MR01 Spot 92	125.095	36234.5	1.60866	8.81166	0.589386	5.07753	0.937031	0.324637	0.728458	0.777411	1812.33	11.5087	1832.36	7.9491	1855.17	10.6503	1855.17	10.6503	97.6912
-16MR01 Spot 106	108.003	314964	2.01123	8.80672	0.797242	5.12009	1.4005	0.327174	1.15143	0.82216	1824.67	18.2982	1839.44	11.8974	1856.18	14.4052	1856.18	14.4052	98.3025
-16MR01 Spot 91	195.036	164964	2.56888	8.78621	0.710861	5.16611	1.31614	0.329347	1.10766	0.841594	1835.21	17.6905	1847.05	11.197	1860.39	12.8377	1860.39	12.8377	98.6466
-16MR01 Spot 70	138.646	352932	5.87507	8.76255	0.80529	5.32627	1.41337	0.338643	1.16151	0.821806	1880.14	18.9418	1873.09	12.0832	1865.26	14.5348	1865.26	14.5348	100.797
-16MR01 Spot 232	151.611	79544.3	1.45221	8.73875	0.573317	5.39718	1.01729	0.342219	0.840345	0.826065	1897.33	13.812	1884.41	8.7149	1870.17	10.343	1870.17	10.343	101.452
-16MR01 Spot 4	63.956	93021.6	1.96644	8.64785	0.724829	5.49389	1.42481	0.344728	1.22667	0.860933	1909.37	20.2717	1899.64	12.2401	1889.01	13.0449	1889.01	13.0449	101.078
-16MR01 Spot 31	152.065	50737.6	1.18648	8.60144	0.780288	5.298	1.32203	0.330652	1.06719	0.807241	1841.54	17.095	1868.54	11.2927	1898.69	14.027	1898.69	14.027	96.9901
-16MR01 Spot 211	143.302	112046	3.42989	8.31918	0.782916	5.7996	1.44009	0.350079	1.20868	0.839307	1934.98	20.204	1946.35	12.4726	1958.46	13.9749	1958.46	13.9749	98.8009
-16MR01 Spot 112	248.533	144338	2.25533	8.26553	0.841353	5.52646	1.34552	0.33144	1.05002	0.780385	1845.36	16.8501	1904.72	11.5693	1970	14.998	1970	14.998	93.6729
-16MR01 Spot 82	596.431	286216	0.707322	8.19661	0.47667	6.09989	1.11047	0.36278	1.00296	0.903186	1995.34	17.2116	1990.23	9.68769	1984.91	8.48335	1984.91	8.48335	100.525
-16MR01 Spot 41	200.081	658461	1.27805	8.18503	0.601551	5.88466	0.918463	0.349486	0.694053	0.755669	1932.14	11.587	1958.97	7.97149	1987.43	10.7028	1987.43	10.7028	97.2181
-16MR01 Spot 58	226.611	310780	2.29382	8.1138	0.607531	6.10951	1.20573	0.359682	1.04149	0.86378	1980.67	17.7605	1991.61	10.5211	2002.96	10.7877	2002.96	10.7877	98.8868
-16MR01 Spot 241	224.052	113523	1.98776	8.04663	0.945416	6.17191	1.54393	0.360347	1.22062	0.790591	1983.82	20.8435	2000.48	13.4917	2017.71	16.7622	2017.71	16.7622	98.3201
-16MR01 Spot 237	204.597	379682	7.3593	8.03447	0.59278	5.93817	1.09272	0.346177	0.917954	0.840067	1916.32	15.2172	1966.84	9.49637	2020.39	10.5066	2020.39	10.5066	94.8486
-16MR01 Spot 200	249.218	72583.1	1.4219	7.94009	0.476717	6.29464	1.63017	0.362647	1.55891	0.956286	1994.71	26.745	2017.71	14.2843	2041.31	8.42706	2041.31	8.42706	97.7172
-16MR01 Spot 143	492.226	123168	0.649708	7.82292	0.671449	5.73789	1.38079	0.325693	1.20654	0.873804	1817.47	19.1085	1937.09	11.9401	2067.56	11.8347	2067.56	11.8347	87.9043
-16MR01 Spot 125	236.996	106624	1.54784	7.77631	0.688827	6.49026	1.14271	0.366204	0.911756	0.797891	2011.51	15.7545	2044.58	10.0541	2078.08	12.1266	2078.08	12.1266	96.7967
-16MR01 Spot 231	308.385	103771	1.59269	7.27738	0.714149	7.34641	1.15024	0.387916	0.901683	0.783912	2113.16	16.246	2154.47	10.2803	2194.07	12.4111	2194.07	12.4111	96.3123
-16MR01 Spot 216	279.462	522457	1.3223	7.09175	0.446476	7.89766	0.874522	0.406387	0.751963	0.859856	2198.38	14.0072	2219.41	7.88192	2238.87	7.72296	2238.87	7.72296	98.1918
-16MR01 Spot 251	67.9452	79597.4	1.4565	6.95162	0.78556	7.93562	1.28712	0.400271	1.01959	0.792151	2170.29	18.7883	2223.73	11.6071	2273.32	13.5358	2273.32	13.5358	95.4678
-16MR01 Spot 292	251.188	106532	0.771755	6.10166	0.54491	10.7367	0.920154	0.475341	0.741455	0.805795	2506.94	15.3999	2500.6	8.54723	2495.45	9.17785	2495.45	9.17785	100.461
-16MR01 Spot 281	71.7804	55057.3	1.68272	5.92474	0.672435	10.8421	1.26231	0.466092	1.06829	0.846302	2466.4	21.8938	2509.68	11.7354	2544.88	11.2675	2544.88	11.2675	96.9164
-16MR01 Spot 197	284.587	921115	1.88312	5.83933	0.691776	11.8586	1.3498	0.502442	1.15905	0.858685	2624.28	24.9869	2593.3	12.6404	2569.18	11.5673	2569.18	11.5673	102.145
-16MR01 Spot 78	418.371	641692	2.61064	5.5428	0.786001	12.4459	1.25808	0.500544	0.982323	0.780813	2616.13	21.1236	2638.65	11.8248	2655.95	13.0338	2655.95	13.0338	98.501
-16MR01 Spot 219	257.631	157885	1.12616	5.51816	0.634234	9.90101	1.20413	0.396426	1.02356	0.850041	2152.56	18.7316	2425.6	11.1054	2663.33	10.5096	2663.33	10.5096	80.8221
1. Analyses with >10% uncertainty (1-sigma) in 206Pb/238U age are not included.
2. Analyses with >10% uncertainty (1-sigma) in 206Pb/207Pb age are not included, unless 206Pb/238U age is <400 Ma.
3. Best age is determined from 206Pb/238U age for analyses with 206Pb/238U age <900 Ma and from 206Pb/207Pb age for analyses with 206Pb/238Uage >900 Ma.
4. Concordance is based on 206Pb/238U age / 206Pb/207Pb age. Value is not reported for 206Pb/238U ages <400 Ma because of large uncertainty in 206Pb/207Pb age.
5. Analyses with 206Pb/238U age >400 Ma and with >20% discordance (<80% concordance) are not included.
6. Analyses with 206Pb/238U age >400 Ma and with >5% reverse discordance (<105% concordance) are not included.
7. All uncertainties are reported at the 2-sigma level, and include only measurement errors.
8. Analyses conducted by LA-ICPMS, as described by Gehrels et al. (2008) and Gehrels and Pecha (2014).
9. U concentration and U/Th are calibrated relative to FC-1 zircon standard and are accurate to ~20%.
10. Common Pb correction is from measured 204Pb with common Pb composition interpreted from Stacey and Kramers (1975).
11. Common Pb composition assigned uncertainties of 1.5 for 206Pb/204Pb, 0.3 for 207Pb/204Pb, and 2.0 for 208Pb/204Pb.
12. U/Pb and 206Pb/207Pb fractionation is calibrated relative to fragments of large Sri Lanka zircons and individual crystals of FC-1, and R33.
13. U decay constants and composition as follows: 238U = 9.8485 x 10-10, 235U = 1.55125 x 10-10, 238U/235U = 137.82.
14. Weighted mean and concordia plots determined with Isoplot (Ludwig, 2008).

## Sheet: 071920BK-01
Internal Uncertainty Level	one sigma
External Uncertainty 206/238 (% two sigma)	0.984593
External Uncertainty 206/207 (% two sigma)	2.04937
							Isotope ratios						Apparent ages (Ma)
Analysis	U	206Pb	U/Th	206Pb*	±	207Pb*	±	206Pb*	±	error	206Pb*	±	207Pb*	±	206Pb*	±	Best age	±	Conc
	(ppm)	204Pb		207Pb*	(%)	235U	(%)	238U	(%)	corr.	238U	(Ma)	235U	(Ma)	207Pb*	(Ma)	(Ma)	(Ma)	(%)
071920BK-01_ 1	1264.51	3261.73	3.31197	17.949	3.97381	0.255116	7.90388	0.0352669	0.739886	0.0936105	223.428	1.62479	230.724	16.314	306.711	179.498	223.428	1.62479	72.8464
071920BK-01_ 2	449.2	687.213	1.95149	12.69	9.43903	0.235002	29.3282	0.0288762	2.0915	0.0713137	183.511	3.78403	214.319	56.7245	568.951	NA	183.511	3.78403	32.2543
071920BK-01_ 3	315.167	11626.9	1.45101	7.61817	1.17195	6.84587	1.45715	0.372762	0.655953	0.450161	2042.39	11.4823	2091.68	12.9106	2141.29	22.7473	2141.29	22.7473	95.3812
071920BK-01_ 4	298.5	455.104	9.11193	11.6383	13.2961	0.20862	36.5878	0.027488	2.44487	0.066822	174.808	4.21639	192.394	64.2112	414.968	NA	174.808	4.21639	42.1255
071920BK-01_ 5	90.4029	1972.03	2.61423	5.8415	1.55686	11.0853	2.56639	0.47636	0.781205	0.304399	2511.39	16.249	2530.32	23.9068	2546.25	40.9685	2546.25	40.9685	98.631
071920BK-01_ 6	318.313	512.496	1.69338	9.87346	14.8015	0.246468	38.0669	0.0237808	3.17109	0.0833031	151.506	4.74838	223.703	76.5735	1073.89	790.44	151.506	4.74838	14.1081
071920BK-01_ 7	735.463	386.099	5.41408	9.35531	18.2898	0.115649	42.9928	0.0117527	5.08988	0.118389	75.3207	3.81143	111.12	45.2823	968.852	913.063	75.3207	3.81143	7.77423
071920BK-01_ 8	1415.46	2281.82	1.4704	18.4871	3.12318	0.170933	6.481	0.025378	1.07334	0.165613	161.555	1.71249	160.228	9.6068	141.676	NA	161.555	1.71249	114.031
071920BK-01_ 9	462.061	1253.95	2.82521	17.4081	7.31911	0.198516	15.4616	0.0307441	1.95619	0.126519	195.204	3.76132	183.87	26.0094	41.6709	NA	195.204	3.76132	468.442
071920BK-01_ 10	900.962	884.612	2.46976	15.7109	7.9583	0.100655	20.5093	0.015159	1.66419	0.0811433	96.9876	1.60198	97.3809	19.0466	108.056	NA	96.9876	1.60198	89.7571
071920BK-01_ 11	2073.25	5173.15	3.08817	19.0099	2.4042	0.285326	4.08573	0.040706	0.771785	0.188898	257.208	1.94601	254.873	9.20955	234.477	92.6262	257.208	1.94601	109.694
071920BK-01_ 13	663.36	442.027	2.6915	10.9536	10.7884	0.0928597	21.1533	0.0112811	2.2191	0.104906	72.3156	1.59579	90.1638	18.2523	593.682	460.626	72.3156	1.59579	12.1808
071920BK-01_ 14	278.389	148.948	3.52229	8.28965	22.8801	0.0274317	136.436	0.0109241	6.26485	0.0459178	70.0395	4.36412	27.4785	37.0042	NA	NA	70.0395	4.36412
071920BK-01_ 15	737.612	1659.44	4.8456	15.5759	4.89929	0.438878	7.27067	0.0561399	0.738521	0.101575	352.107	2.53064	369.461	22.5214	480.762	160.011	352.107	2.53064	73.2394
071920BK-01_ 16	1603.56	1267.09	1.07022	16.3816	8.58509	0.102531	14.4257	0.014706	0.931328	0.0645603	94.1105	0.87011	99.1099	13.6225	222.131	NA	94.1105	0.87011	42.3672
071920BK-01_ 17	1018.53	748.139	4.41698	14.5612	7.07921	0.0788373	14.2445	0.0114105	2.88004	0.202186	73.14	2.09456	77.0512	10.5698	201.109	NA	73.14	2.09456	36.3683
071920BK-01_ 18	340.252	259.367	2.39816	9.44409	17.3741	0.0938475	67.926	0.0135541	4.87546	0.0717761	86.7882	4.20297	91.0812	59.2413	206.078	NA	86.7882	4.20297	42.1142
071920BK-01_ 19	211.282	297.58	2.53757	8.70484	20.4238	0.263033	53.9028	0.0281771	3.84892	0.0714047	179.129	6.79963	237.108	114.464	860.38	NA	179.129	6.79963	20.8198
071920BK-01_ 20	1538.4	1310.17	2.39755	14.3589	8.82825	0.1196	10.6841	0.0145582	0.954539	0.0893418	93.1716	0.882964	114.709	11.5893	589.389	231.399	93.1716	0.882964	15.8082
071920BK-01_ 21	386.418	12077.2	1.01459	5.20142	0.644653	14.1508	0.877704	0.527129	0.542055	0.617583	2729.34	12.0615	2759.87	8.32402	2782.97	11.3091	2782.97	11.3091	98.073
071920BK-01_ 22	129.914	220.54	2.69504	9.64438	23.5653	0.15745	184.359	0.0312651	5.52252	0.0299552	198.461	10.7931	148.469	260.194	NA	NA	198.461	10.7931
071920BK-01_ 23	163.368	274.359	1.38546	9.41125	14.2892	0.203528	43.7745	0.0274579	4.4688	0.102087	174.619	7.69863	188.107	75.3035	361.952	NA	174.619	7.69863	48.2436
071920BK-01_ 24	756.253	546.732	5.92274	11.1641	13.6427	0.0964127	33.4704	0.0108866	2.40922	0.0719806	69.8001	1.67257	93.4596	29.8935	750.131	724.412	69.8001	1.67257	9.30505
071920BK-01_ 25	623.328	608.54	1.01549	11.7165	18.6181	0.135651	22.5331	0.0157089	3.09428	0.137321	100.479	3.085	129.163	27.336	696.563	481.147	100.479	3.085	14.425
071920BK-01_ 26	1379.64	1423.34	3.1043	17.9924	3.66171	0.107342	10.9356	0.0169279	1.66722	0.152458	108.211	1.78906	103.531	10.7641	NA	NA	108.211	1.78906
071920BK-01_ 27	181.629	185.924	2.04161	5.5572	16.4818	0.22819	56.0396	0.015271	5.99266	0.106936	97.6992	5.81064	208.703	106.104	1773.05	1117.17	97.6992	5.81064	5.51024
071920BK-01_ 28	177.906	334.56	2.44647	8.66087	18.5648	0.344901	39.6114	0.0335901	2.30968	0.0583084	212.978	4.83874	300.879	103.503	1055.13	829.078	212.978	4.83874	20.185
071920BK-01_ 29	885.898	555.092	2.90599	10.7137	9.72993	0.103693	38.6895	0.0108728	2.18344	0.0564351	69.7125	1.51393	100.179	36.9245	904.629	826.545	69.7125	1.51393	7.70619
071920BK-01_ 30	342.667	503.559	5.57405	10.199	9.13344	0.302811	23.7023	0.0307602	2.00209	0.0844682	195.304	3.85152	268.593	55.9951	969.715	488.415	195.304	3.85152	20.1404
071920BK-01_ 31	142.97	289.355	2.99178	7.42599	33.3754	0.409442	42.866	0.0335789	4.01854	0.0937467	212.909	8.41608	348.473	127.101	1392.77	860.064	212.909	8.41608	15.2867
071920BK-01_ 32	269.138	115.954	3.92522	6.75073	20.4631	0.0288964	647.146	0.0129688	6.75973	0.0104454	83.0651	5.57895	28.925	186.619	NA	NA	83.0651	5.57895
071920BK-01_ 33	864.786	1052.45	2.24293	13.8529	6.71138	0.137293	23.8034	0.0166993	1.42816	0.0599981	106.762	1.51217	130.63	29.1853	591.058	521.968	106.762	1.51217	18.0628
071920BK-01_ 34	385.113	665.468	2.51258	13.9185	7.68848	0.213351	25.1259	0.0305985	2.45823	0.0978367	194.293	4.70492	196.361	44.8893	222.312	NA	194.293	4.70492	87.3968
071920BK-01_ 35	476.848	739.939	2.93273	14.615	9.80968	0.206166	41.1298	0.0303185	1.64642	0.0400298	192.542	3.12317	190.33	71.5012	163.981	NA	192.542	3.12317	117.417
071920BK-01_ 36	1007.69	1102.07	1.78889	14.1911	7.70161	0.13138	22.9255	0.0163787	1.82418	0.0795701	104.728	1.895	125.337	27.0379	537.403	506.062	104.728	1.895	19.4879
071920BK-01_ 37	743.623	1337.17	3.05542	14.6538	7.15794	0.222508	16.9525	0.0276857	1.46898	0.0866525	176.048	2.55111	203.995	31.3398	541.58	371.686	176.048	2.55111	32.5063
071920BK-01_ 38	1326.95	1081.82	2.20325	14.9541	7.8808	0.123678	11.3849	0.0163074	0.962189	0.0845147	104.276	0.995262	118.401	12.7242	413.409	254.305	104.276	0.995262	25.2235
071920BK-01_ 39	444.576	779.754	2.01527	11.6576	11.4839	0.297883	25.6948	0.0309635	1.67684	0.0652598	196.576	3.24651	264.746	59.95	922.626	535.393	196.576	3.24651	21.3061
071920BK-01_ 40	403.951	747.098	2.87292	10.9421	9.38667	0.295357	11.658	0.0286098	2.65578	0.227807	181.842	4.76184	262.767	26.997	1066.01	228.929	181.842	4.76184	17.0581
071920BK-01_ 42	109.98	2618.79	0.974449	8.96464	2.8689	5.03168	3.87435	0.331154	0.858681	0.221632	1843.97	13.7706	1824.67	32.8288	1803.49	68.7293	1803.49	68.7293	102.245
071920BK-01_ 43	533.458	1071.06	3.00512	14.185	7.16951	0.257517	8.54292	0.0316835	1.89271	0.221553	201.076	3.74705	232.664	17.7653	566.154	181.68	201.076	3.74705	35.5161
071920BK-01_ 44	89.5295	283.25	1.45248	4.8222	21.4671	0.768751	27.6078	0.0328285	6.24	0.226023	208.226	12.7857	579.046	122.427	2556.76	459.509	208.226	12.7857	8.14416
071920BK-01_ 45	308.661	586.193	3.22112	13.5154	9.95035	0.210068	22.018	0.0300169	2.66329	0.120959	190.654	5.0033	193.61	38.8302	230.777	NA	190.654	5.0033	82.614
071920BK-01_ 46	516.766	9101.46	1.88427	8.70717	0.837852	5.14478	1.22184	0.316991	0.584862	0.478674	1775.02	9.07478	1843.53	10.3877	1922.53	19.2311	1922.53	19.2311	92.3271
071920BK-01_ 47	3152.24	2585.83	1.98258	17.874	3.60681	0.0816543	10.0959	0.0113485	0.781646	0.0774222	72.7453	0.565414	79.6991	7.73879	294.468	230.298	72.7453	0.565414	24.704
071920BK-01_ 48	834.135	546.866	3.12932	8.01504	20.0324	0.163697	31.8701	0.0114867	2.02514	0.0635435	73.626	1.48255	153.934	45.5518	1686.07	603.038	73.626	1.48255	4.36673
071920BK-01_ 49	505.076	864.427	1.85068	14.4356	11.7111	0.208697	15.6515	0.0274585	1.48833	0.0950915	174.623	2.56407	192.459	27.4468	418.195	349.856	174.623	2.56407	41.7562
071920BK-01_ 50	158.208	387.532	4.11873	8.58695	24.217	0.394003	50.832	0.0341003	4.53823	0.0892789	216.16	9.64717	337.289	146.899	1288.73	1058.52	216.16	9.64717	16.7731
071920BK-01_ 51	546.82	865.042	4.92335	17.1179	6.63852	0.178091	14.068	0.0298861	1.34581	0.0956647	189.835	2.51758	166.417	21.5969	NA	NA	189.835	2.51758
071920BK-01_ 53	352.506	357.573	2.02741	9.3992	18.424	0.141772	26.2238	0.0151827	5.12521	0.195441	97.1384	4.94122	134.621	33.0742	860.988	542.218	97.1384	4.94122	11.2822
071920BK-01_ 54	2050.95	1311.81	4.53798	15.1846	5.79143	0.0876559	18.9023	0.01134	1.44936	0.0766762	72.6912	1.04764	85.3174	15.4692	455.796	421.534	72.6912	1.04764	15.9482
071920BK-01_ 55	683.461	1287.05	2.29606	14.6574	7.99829	0.226008	11.6853	0.0281085	1.46547	0.125411	178.699	2.58282	206.898	21.876	542.583	254.197	178.699	2.58282	32.9349
071920BK-01_ 56	185.448	318.529	2.32108	9.26035	16.2221	0.273418	34.945	0.03092	5.08179	0.145423	196.304	9.82541	245.423	76.3287	746.941	752.191	196.304	9.82541	26.2811
071920BK-01_ 57	604.399	712.661	2.74094	13.3253	16.3885	0.124863	27.0801	0.0160812	2.30912	0.0852702	102.842	2.35589	119.471	30.5312	465.698	NA	102.842	2.35589	22.0833
071920BK-01_ 58	437.546	1554.36	1.63789	15.2281	5.29757	0.432886	12.6062	0.053067	1.14141	0.0905439	333.324	3.70791	365.224	38.6888	574.037	273.964	333.324	3.70791	58.0666
071920BK-01_ 59	270.087	2820.47	3.14129	13.1736	2.90584	1.85315	6.18167	0.180515	0.894579	0.144715	1069.79	8.81819	1064.55	40.7901	1054.73	123.314	1054.73	123.314	101.428
071920BK-01_ 60	229.216	438.731	2.53321	11.6851	11.2049	0.218774	57.7641	0.0289414	3.58852	0.0621236	183.92	6.50672	200.889	105.663	406.029	NA	183.92	6.50672	45.2972
071920BK-01_ 61	720.872	1466	2.02246	13.7294	7.77062	0.267997	13.6236	0.0293708	1.07685	0.079043	186.609	1.98069	241.091	29.2451	812.936	285.191	186.609	1.98069	22.9549
071920BK-01_ 62	732.238	14966.3	2.24407	9.19904	0.891573	4.91616	1.26449	0.320219	0.712247	0.56327	1790.8	11.1365	1805.03	10.6695	1822.28	18.9573	1822.28	18.9573	98.2723
071920BK-01_ 63	84.7691	214.909	3.99747	6.86873	15.2874	0.366065	53.02	0.0323626	9.80792	0.184985	205.318	19.8202	316.733	145.246	1247.27	1100.84	205.318	19.8202	16.4614
071920BK-01_ 64	707.471	776.157	7.63482	9.88654	19.1807	0.150581	21.3729	0.0127971	3.04266	0.142361	81.9721	2.47834	142.425	28.4092	1324.12	414.334	81.9721	2.47834	6.19068
071920BK-01_ 65	85.3001	194.92	2.31984	5.985	40.798	0.441006	51.6822	0.0323777	3.10879	0.060152	205.413	6.28517	370.962	161.961	1602.13	1039.49	205.413	6.28517	12.8212
071920BK-01_ 66	1121.07	1068.76	1.43276	13.9317	7.20875	0.12438	10.9803	0.0150828	1.82034	0.165781	96.504	1.74361	119.035	12.334	597.599	235.163	96.504	1.74361	16.1486
071920BK-01_ 67	470.227	1076.53	2.25764	14.2421	6.71372	0.231373	23.8	0.0287892	2.22237	0.0933769	182.966	4.00902	211.331	45.4381	541.546	524.847	182.966	4.00902	33.7858
071920BK-01_ 68	206.682	523.046	2.28901	8.55219	20.1616	0.369097	23.6651	0.0288194	6.20298	0.262114	183.155	11.2012	318.984	64.8688	1486.39	438.384	183.155	11.2012	12.3221
071920BK-01_ 70	164.619	395.198	4.06132	7.33363	12.4606	0.468485	23.8977	0.0324975	4.14657	0.173514	206.16	8.41335	390.142	77.5631	1707.28	439.486	206.16	8.41335	12.0754
071920BK-01_ 71	348.199	922.824	1.29369	11.9182	5.56049	0.287046	14.4007	0.029594	2.83641	0.196963	188.007	5.25564	256.232	32.6228	939.373	290.779	188.007	5.25564	20.0141
071920BK-01_ 72	311.386	613.205	1.6016	9.57653	9.1152	0.331166	11.5607	0.0286679	1.75757	0.15203	182.206	3.15756	290.456	29.211	1288.31	223.119	182.206	3.15756	14.143
071920BK-01_ 73	92.1883	1242.71	1.19616	10.1885	7.75171	2.92475	8.39012	0.238141	0.98275	0.117132	1377.03	12.185	1388.34	63.5685	1406.58	159.809	1406.58	159.809	97.8991
071920BK-01_ 74	1963.66	1540.05	7.40721	16.5151	7.42449	0.108901	8.91965	0.0151635	1.2368	0.138661	97.0165	1.19092	104.96	8.89463	290.254	202.156	97.0165	1.19092	33.4247
071920BK-01_ 76	787.194	1128.37	2.74192	15.0127	7.57162	0.203238	9.38705	0.0269101	1.40888	0.150088	171.181	2.38	187.862	16.1009	404.034	208.176	171.181	2.38	42.3679
071920BK-01_ 77	1811.75	1360.36	5.79647	13.9789	7.47358	0.100015	9.01445	0.0116708	1.55088	0.172044	74.7992	1.15335	96.7905	8.32237	680.297	190.053	74.7992	1.15335	10.9951
071920BK-01_ 78	207.761	363.42	4.23078	10.0799	15.5702	0.256663	51.0163	0.0307751	3.19799	0.0626856	195.397	6.15503	231.974	106.185	621.96	NA	195.397	6.15503	31.4164
071920BK-01_ 79	231.652	190.072	5.95263	6.22267	17.6557	0.172182	52.7158	0.0140321	5.65679	0.107307	89.8277	5.04612	161.311	78.7832	1404.86	1085.67	89.8277	5.04612	6.39404
071920BK-01_ 80	307.752	581.539	1.62407	11.8892	11.8753	0.261258	18.7869	0.0312938	2.1825	0.116171	198.641	4.26922	235.68	39.534	624.184	405.598	198.641	4.26922	31.8241
071920BK-01_ 81	241.066	653.488	3.09321	8.65969	18.1325	0.400425	22.206	0.0300949	3.27729	0.147585	191.142	6.17232	341.956	64.5575	1558.32	417.179	191.142	6.17232	12.2659
071920BK-01_ 82	1884.1	1253.98	5.09139	14.0141	7.72634	0.0954302	10.0728	0.0113091	1.32242	0.131286	72.494	0.953305	92.5493	8.9103	647.25	214.995	72.494	0.953305	11.2003
071920BK-01_ 83	421.66	1192.98	1.73021	16.0756	6.04788	0.380353	8.00359	0.053911	1.04173	0.130157	338.488	3.43514	327.298	22.3966	249.448	182.883	338.488	3.43514	135.695
071920BK-01_ 84	1263.56	2302.58	2.94238	17.3487	4.04221	0.250454	8.90524	0.0346202	0.950771	0.106765	219.4	2.05089	226.945	18.1126	306.873	202.021	219.4	2.05089	71.4953
071920BK-01_ 85	896.184	757.484	3.59958	14.0164	7.89546	0.0995888	14.6606	0.0135815	1.89709	0.129401	86.9625	1.63868	96.3967	13.483	337.568	330.847	86.9625	1.63868	25.7615
071920BK-01_ 86	1188.93	4121.03	4.23649	10.156	1.58904	1.2771	2.77161	0.0951692	1.16665	0.420928	586.036	6.53543	835.559	15.7848	1574.28	47.0765	1574.28	47.0765	37.2256
071920BK-01_ 87	251.658	531.324	1.96817	8.51394	22.7744	0.385634	30.5762	0.0299591	2.85802	0.0934722	190.292	5.35911	331.175	86.6147	1495.94	589.977	190.292	5.35911	12.7206
071920BK-01_ 88	1266.72	1575.48	3.22906	16.8153	4.40767	0.103671	11.5895	0.0146955	1.73623	0.14981	94.0441	1.62097	100.159	11.0543	249.264	NA	94.0441	1.62097	37.7287
071920BK-01_ 89	315.653	685.82	1.95848	11.849	9.99139	0.252236	19.8409	0.028299	2.77061	0.139641	179.894	4.91525	228.391	40.6018	763.703	417.839	179.894	4.91525	23.5554
071920BK-01_ 90	153.722	2285.86	3.9836	8.8295	2.96164	4.91997	3.57436	0.325695	0.716759	0.200528	1817.48	11.3517	1805.69	30.1717	1792.87	63.7832	1792.87	63.7832	101.373
071920BK-01_ 91	164.734	266.002	5.01315	9.68231	17.5936	0.202841	35.0215	0.0300915	4.11399	0.11747	191.121	7.7473	187.527	60.0368	143.547	NA	191.121	7.7473	133.142
071920BK-01_ 92	1909.57	1379.16	2.51547	16.6638	3.87233	0.104035	14.5751	0.0149816	0.943528	0.0647356	95.8615	0.897788	100.494	13.9465	212.811	NA	95.8615	0.897788	45.0453
071920BK-01_ 93	273.984	605.109	3.49043	13.8393	11.122	0.229301	27.3484	0.0339996	2.57735	0.0942413	215.532	5.46317	209.622	51.8428	144.704	NA	215.532	5.46317	148.946
071920BK-01_ 94	127.598	4853.29	0.782744	5.37496	1.30384	12.972	1.51604	0.504171	0.646123	0.42619	2631.7	13.961	2677.62	14.2928	2713.19	22.6173	2713.19	22.6173	96.9964
071920BK-01_ 95	465.021	1438.05	1.63451	14.8019	7.39433	0.457806	12.2426	0.0566144	0.956767	0.0781506	355.003	3.30472	382.731	39.0571	554.983	267.169	355.003	3.30472	63.9664
071920BK-01_ 96	289.682	1086.29	1.89687	14.1115	10.5774	0.464027	16.6162	0.057352	1.21507	0.0731258	359.501	4.24863	387.054	53.5251	556.229	363.712	359.501	4.24863	64.6319
071920BK-01_ 97	949.046	664.825	5.00497	13.1397	7.78872	0.0878757	18.5772	0.0115432	1.97958	0.10656	73.9863	1.45625	85.5226	15.2381	421.8	415.453	73.9863	1.45625	17.5406
071920BK-01_ 98	198.313	145.64	1.63015	5.45776	24.0083	0.135623	66.9263	0.0110875	7.81591	0.116784	71.0812	5.52512	129.137	81.3303	1398.83	1466.28	71.0812	5.52512	5.08146
071920BK-01_ 99	864.122	14521.2	6.18994	9.20679	0.825226	4.31652	1.06383	0.283587	0.640038	0.601636	1609.4	9.1156	1696.52	8.77039	1806.68	15.4471	1806.68	15.4471	89.0804
071920BK-01_ 100	675.983	21277.2	8.7674	5.7921	0.642553	11.8137	0.918319	0.484898	0.643562	0.700804	2548.57	13.5476	2589.75	8.59697	2622.85	10.897	2622.85	10.897	97.168
071920BK-01_ 101	1070	1821	4.32981	17.7968	3.54241	0.211185	5.60672	0.0310091	0.883306	0.157544	196.861	1.7126	194.546	9.9267	167.56	129.405	196.861	1.7126	117.487
071920BK-01_ 102	1545.12	1790.07	2.55664	17.192	5.10884	0.106438	11.8425	0.0150067	1.09561	0.0925154	96.0206	1.04422	102.702	11.5681	261.646	NA	96.0206	1.04422	36.6986
071920BK-01_ 103	625.412	1954.92	4.96594	15.8952	5.87731	0.450744	7.73475	0.057619	1.01721	0.131512	361.129	3.57245	377.8	24.4062	482.29	169.606	361.129	3.57245	74.878
071920BK-01_ 104	318.539	658.853	1.981	12.7044	9.64663	0.227627	17.1983	0.0285154	2.49626	0.145146	181.25	4.46146	208.238	32.3906	526.779	375.478	181.25	4.46146	34.4072
071920BK-01_ 105	1065.04	2925.64	2.27335	16.5941	4.60683	0.284932	7.49628	0.0365429	1.91521	0.255488	231.368	4.35262	254.563	16.8802	475.025	160.493	231.368	4.35262	48.7066
071920BK-01_ 106	843.867	1985.05	1.98233	14.1639	8.26187	0.250417	9.42122	0.0280349	1.61704	0.171638	178.238	2.8427	226.915	19.1601	768.205	195.848	178.238	2.8427	23.2018
071920BK-01_ 107	1594.19	1858.48	2.36258	15.2361	6.56355	0.123184	8.50555	0.015157	1.40592	0.165294	96.9749	1.35319	117.954	9.47212	565.996	182.953	96.9749	1.35319	17.1335
071920BK-01_ 108	910.971	577.99	6.78969	13.8399	11.231	0.0718255	36.3206	0.0108917	1.81062	0.049851	69.8331	1.25759	70.4302	24.7186	91.7873	NA	69.8331	1.25759	76.0814
071920BK-01_ 109	188.921	378.488	3.68263	9.29407	19.1383	0.348765	37.4212	0.0354035	2.67054	0.0713643	224.278	5.88645	303.792	98.5611	971.123	788.631	224.278	5.88645	23.0947
071920BK-01_ 110	349.437	1042.99	2.31876	13.8418	8.60553	0.480653	20.6824	0.0583441	1.24469	0.0601812	365.547	4.42334	398.52	68.2752	595.431	451.746	365.547	4.42334	61.3921
071920BK-01_ 111	1666.38	1012.66	6.06188	17.2799	8.01675	0.0791758	13.9542	0.0129703	1.32425	0.0949	83.0742	1.09305	77.3697	10.3956	NA	NA	83.0742	1.09305
071920BK-01_ 112	699.291	1391.89	2.09075	13.6339	11.7195	0.223725	15.9916	0.0249727	1.03521	0.0647346	159.007	1.62592	205.005	29.6945	774.424	337.746	159.007	1.62592	20.5323
071920BK-01_ 114	670.899	1940.12	1.92786	16.3183	4.33591	0.437138	6.65604	0.0571498	0.96664	0.145227	358.269	3.36869	368.232	20.5601	432.39	146.855	358.269	3.36869	82.8578
071920BK-01_ 115	692.348	3123.9	1.82049	16.3951	5.89589	0.45258	9.78601	0.0564577	0.79163	0.0808941	354.047	2.72717	379.084	30.9689	535.952	213.93	354.047	2.72717	66.0595
071920BK-01_ 116	482.213	874.604	2.28696	12.8091	8.36246	0.172385	26.2774	0.0196986	2.155	0.0820099	125.751	2.68368	161.487	39.2516	724.894	564.499	125.751	2.68368	17.3475
071920BK-01_ 117	640.611	1205.65	2.97917	15.3788	5.88994	0.214815	13.7522	0.0285485	1.20984	0.0879747	181.458	2.16474	197.586	24.6968	395.739	308.431	181.458	2.16474	45.8529
071920BK-01_ 118	1166.46	1187.11	3.03079	13.5193	7.41082	0.130368	18.617	0.0148342	1.15192	0.0618744	94.925	1.08545	124.428	21.8051	733.924	396.686	94.925	1.08545	12.9339
071920BK-01_ 119	4129.32	6230.83	6.03481	19.5358	2.823	0.121228	3.70577	0.0174793	0.678097	0.182984	111.706	0.750946	116.185	4.06837	209.92	84.4744	111.706	0.750946	53.2135
071920BK-01_ 120	92.8117	195.977	2.10857	6.82984	23.3355	0.322924	66.484	0.0308616	6.61925	0.0995616	195.939	12.7746	284.149	166.253	1093	NA	195.939	12.7746	17.9266
071920BK-01_ 121	715.876	2633.03	1.81656	16.3546	4.85653	0.458358	6.13251	0.0580236	0.740976	0.120828	363.595	2.61958	383.115	19.5732	503.796	134.101	363.595	2.61958	72.171
071920BK-01_ 123	1104.35	812.636	2.81099	12.9241	6.34404	0.106058	15.1032	0.012505	2.16601	0.143414	80.1129	1.72452	102.353	14.706	658.111	322.148	80.1129	1.72452	12.1732
071920BK-01_ 124	358.838	331.988	1.79069	7.54416	23.7463	0.145983	38.5172	0.0112717	3.50809	0.0910784	72.2554	2.52063	138.359	49.8607	1507.55	753.699	72.2554	2.52063	4.79289
071920BK-01_ 125	626.157	1969	2.68667	15.9645	5.2392	0.444537	8.79139	0.0562364	0.808572	0.0919733	352.696	2.77519	373.446	27.4772	505.259	192.933	352.696	2.77519	69.8051
071920BK-01_ 126	680.039	950.969	5.20837	13.4856	6.1416	0.128123	11.3472	0.0152111	2.30071	0.202757	97.3187	2.22221	122.41	13.0862	643.341	239.534	97.3187	2.22221	15.1271
071920BK-01_ 127	436.055	1077.64	2.21565	14.157	9.54685	0.237547	19.0378	0.029059	2.1305	0.111909	184.656	3.87828	216.41	37.1216	578.658	414.448	184.656	3.87828	31.9111
071920BK-01_ 128	348.538	860.662	13.1376	10.0801	15.3095	0.351297	20.4538	0.0296339	2.60069	0.127149	188.257	4.82516	305.696	54.0427	1338.5	396.207	188.257	4.82516	14.0648
071920BK-01_ 129	186.12	179.173	1.41576	5.43031	29.3751	0.235516	38.7567	0.0152278	4.96773	0.128177	97.4246	4.80341	214.742	75.1521	1835.67	725.412	97.4246	4.80341	5.30732
071920BK-01_ 130	895.762	636.012	4.84721	16.1224	5.11987	0.0722404	28.1287	0.0130927	1.27532	0.0453388	83.8534	1.06248	70.8233	19.2451	NA	NA	83.8534	1.06248
071920BK-01_ 131	240.716	528.778	2.14374	10.7186	15.3693	0.293804	27.0929	0.0310749	4.14238	0.152896	197.272	8.04799	261.549	62.5494	886.774	563.008	197.272	8.04799	22.246
071920BK-01_ 132	888.668	760.569	1.89259	12.7516	8.54983	0.121232	14.8331	0.0142841	1.83848	0.123944	91.4298	1.66905	116.189	16.2864	659.622	317.105	91.4298	1.66905	13.8609
071920BK-01_ 133	2307.71	2676.55	1.97068	17.4405	5.71202	0.109497	9.8811	0.014755	0.922075	0.093317	94.4222	0.864298	105.505	9.90208	364.579	222.286	94.4222	0.864298	25.899
071920BK-01_ 134	734.304	486.1	3.04593	9.96023	17.2834	0.11	38.3255	0.0108371	3.04791	0.0795268	69.4843	2.10645	105.965	38.5829	1031.85	801.399	69.4843	2.10645	6.73397
071920BK-01_ 135	500.528	486.315	2.50952	12.3422	17.29	0.106384	37.8443	0.0146332	2.03832	0.0538608	93.6483	1.89505	102.652	36.9652	318.046	NA	93.6483	1.89505	29.4449
071920BK-01_ 136	317.688	718.607	2.97305	12.3867	10.6894	0.271152	31.4908	0.0312895	2.14032	0.0679665	198.614	4.18614	243.615	68.31	704.135	684.567	198.614	4.18614	28.2067
071920BK-01_ 137	618.232	1265.49	3.31519	13.1913	10.2727	0.268037	13.6935	0.0290805	1.36608	0.0997607	184.791	2.48854	241.123	29.3987	833.966	285.193	184.791	2.48854	22.1581
071920BK-01_ 138	1408.05	1049.43	4.02817	15.1447	8.68443	0.0865086	22.6611	0.011615	1.53071	0.0675482	74.4437	1.13297	84.2457	18.3224	372.758	NA	74.4437	1.13297	19.9711
071920BK-01_ 139	1673.85	2001.57	22.0179	16.9151	5.2367	0.111245	7.26517	0.0150106	1.58409	0.218039	96.0452	1.51017	107.104	7.38508	361.577	160.099	96.0452	1.51017	26.5629
071920BK-01_ 140	579.461	732.583	1.2231	12.1147	10.1092	0.146251	29.7528	0.0162759	1.96327	0.0659862	104.077	2.0269	138.597	38.5644	780.752	637.327	104.077	2.0269	13.3303
071920BK-01_ 141	328.762	2627.38	2.02556	13.0174	2.84442	1.78702	3.31334	0.1749	0.775088	0.233929	1039.05	7.43805	1040.74	21.575	1045.17	64.9918	1045.17	64.9918	99.4146
071920BK-01_ 142	901.183	2615.96	1.59693	17.3217	2.83875	0.431632	5.93888	0.0578483	0.849	0.142956	362.527	2.99291	364.335	18.1829	376.818	132.337	362.527	2.99291	96.2074
071920BK-01_ 143	1615.61	1075.75	3.14884	13.3682	8.87533	0.0983524	12.7279	0.0112073	1.28208	0.100731	71.8453	0.916003	95.2544	11.573	730.879	269.281	71.8453	0.916003	9.82999
071920BK-01_ 144	210.234	4977.33	3.51184	9.00454	1.25608	5.07672	2.84535	0.32745	0.681006	0.23934	1826.01	10.8292	1832.22	24.1414	1840.06	50.0254	1840.06	50.0254	99.2365
071920BK-01_ 145	1075.1	2423.58	1.9765	17.6818	5.4316	0.213316	9.7722	0.0292196	0.983049	0.100596	185.662	1.79912	196.331	17.4467	327.559	221.095	185.662	1.79912	56.6804
071920BK-01_ 146	831.688	1390.23	1.49048	16.9995	4.42414	0.174328	19.1013	0.0250022	0.867186	0.0453994	159.193	1.36359	163.168	28.7995	222.271	NA	159.193	1.36359	71.6209
071920BK-01_ 147	449.977	1307.79	1.44396	15.8015	4.77719	0.441462	11.7288	0.058615	0.976436	0.0832509	367.197	3.48524	371.283	36.489	397.819	262.792	367.197	3.48524	92.3024
071920BK-01_ 148	648.861	676.337	2.01179	11.4612	12.5934	0.158341	34.6119	0.0166095	1.74911	0.0505351	106.192	1.84221	149.25	48.0769	903.828	733.917	106.192	1.84221	11.7492
071920BK-01_ 149	749.048	468.29	4.94778	12.8014	10.8084	0.0749463	33.7797	0.0111358	3.40313	0.100745	71.389	2.41606	73.3825	23.9182	139.84	NA	71.389	2.41606	51.0507
071920BK-01_ 150	698.344	475.331	3.69565	11.6343	15.3462	0.0863033	32.1584	0.0109358	1.72763	0.0537223	70.1139	1.20474	84.0539	25.9475	501.638	NA	70.1139	1.20474	13.977
071920BK-01_ 151	1154.44	783.704	4.15647	12.0908	19.6395	0.105349	22.6552	0.0114643	1.59911	0.0705848	73.4831	1.1684	101.702	21.9278	827.693	477.175	73.4831	1.1684	8.87806
071920BK-01_ 152	343.734	624.374	2.27619	14.49	10.8079	0.186151	52.3517	0.0287174	2.30829	0.0440921	182.516	4.15392	173.34	83.6115	50.9383	NA	182.516	4.15392	358.308
071920BK-01_ 153	2588.46	9353.08	0.983724	18.3101	1.55686	0.433013	1.82415	0.0564369	0.639685	0.350675	353.92	2.20294	365.314	5.59688	439.234	38.0179	353.92	2.20294	80.5766
071920BK-01_ 154	222.651	444.561	2.06358	10.9538	7.49619	0.248703	21.6713	0.0293515	3.79435	0.175087	186.488	6.97465	225.522	43.8537	656.101	462.507	186.488	6.97465	28.4237
071920BK-01_ 155	1601.59	1977.81	2.44322	17.1399	4.6366	0.169681	9.97775	0.0230424	0.895161	0.0897157	146.855	1.29973	159.142	14.698	347.134	225.231	146.855	1.29973	42.3051
071920BK-01_ 156	1156.38	2991.35	4.20938	18.1883	2.84214	0.387536	6.57154	0.0535132	0.712827	0.108472	336.055	2.33412	332.568	18.6386	309.217	148.882	336.055	2.33412	108.679
071920BK-01_ 157	2383.67	1866.56	6.6958	16.7197	5.44537	0.115703	15.3695	0.0152245	0.841699	0.0547642	97.4039	0.813685	111.169	16.1854	418.003	344.553	97.4039	0.813685	23.3022
071920BK-01_ 158	914.196	718.854	2.4556	14.1958	8.58806	0.10539	39.8836	0.014595	1.55811	0.0390663	93.4054	1.44486	101.739	38.6293	302.654	NA	93.4054	1.44486	30.8621
071920BK-01_ 159	305.994	755.276	2.31135	13.7804	10.2086	0.213065	18.7493	0.0277265	1.89949	0.10131	176.303	3.30349	196.121	33.4502	442.711	418.103	176.303	3.30349	39.8236
071920BK-01_ 160	612.656	581.18	2.0158	14.6697	17.0918	0.0849186	59.1399	0.0137916	2.31479	0.0391409	88.2991	2.03	82.7588	47.0356	NA	NA	88.2991	2.03
071920BK-01_ 161	491.338	1019.16	2.91689	13.6453	9.77266	0.264234	24.6159	0.0309798	1.22141	0.0496187	196.678	2.36597	238.073	52.2866	670.21	533.617	196.678	2.36597	29.3456
071920BK-01_ 162	1002.12	1023.91	2.82694	14.2619	7.38474	0.118887	11.8009	0.0147312	1.58879	0.134632	94.2704	1.48686	114.062	12.7326	550.714	256.094	94.2704	1.48686	17.1179
071920BK-01_ 163	517.596	711.526	1.94656	11.3154	13.9816	0.246023	19.209	0.024912	2.10329	0.109495	158.626	3.29565	223.341	38.5294	976.214	392.592	158.626	3.29565	16.2491
071920BK-01_ 165	355.616	943.38	2.59887	13.2824	12.2551	0.265016	26.4937	0.0305456	2.33293	0.0880559	193.962	4.45759	238.701	56.4151	706.613	570.691	193.962	4.45759	27.4495
071920BK-01_ 166	134.858	286.921	2.77367	8.70778	15.8728	0.296799	58.5519	0.0317405	6.94182	0.118558	201.432	13.7669	263.897	136.893	863.927	NA	201.432	13.7669	23.3159
071920BK-01_ 167	171.872	4745.73	1.04072	5.36585	1.17078	14.3911	1.52355	0.540456	0.81282	0.533504	2785.36	18.3834	2775.84	14.4657	2769.64	21.14	2769.64	21.14	100.568
071920BK-01_ 168	1326.55	946.179	4.3505	14.6654	7.16142	0.0842589	17.9095	0.0110572	1.54872	0.0864749	70.8878	1.09184	82.1412	14.1327	424.018	400.956	70.8878	1.09184	16.7181
071920BK-01_ 169	475.984	1309.49	2.87713	13.4596	8.57047	0.288022	16.8444	0.0315975	1.67336	0.0993424	200.539	3.30408	257.002	38.2642	810.775	352.922	200.539	3.30408	24.7342
071920BK-01_ 170	1975.96	1753.67	5.51816	17.7149	3.61903	0.106383	10.1342	0.0153687	1.13699	0.112193	98.3194	1.1094	102.652	9.89472	205.463	NA	98.3194	1.1094	47.8526
071920BK-01_ 171	205.21	424.055	2.74395	10.5603	19.4827	0.282022	25.7137	0.0323514	3.46363	0.1347	205.248	6.99707	252.26	57.4971	716.706	549.43	205.248	6.99707	28.6377
071920BK-01_ 172	872.245	1356.13	3.64866	13.659	9.35144	0.144823	13.8536	0.016072	2.04645	0.14772	102.783	2.08673	137.33	17.7966	786.616	288.967	102.783	2.08673	13.0665
071920BK-01_ 173	732.171	1865.44	2.88689	16.57	5.66134	0.231703	7.39135	0.030631	1.36438	0.184591	194.496	2.61403	211.603	14.1191	407.539	162.751	194.496	2.61403	47.7246
071920BK-01_ 174	900.816	7607.51	2.50899	13.1299	1.25785	1.9353	1.57483	0.179917	0.624772	0.396723	1066.52	6.14131	1093.38	10.5433	1148.11	28.7163	1148.11	28.7163	92.8939
071920BK-01_ 175	943.573	1044.8	3.17946	14.1032	9.78875	0.127693	22.4207	0.0154871	1.46984	0.0655571	99.0709	1.44505	122.022	25.7839	597.255	490.25	99.0709	1.44505	16.5877
071920BK-01_ 176	585.07	1577.74	2.20806	16.5095	4.99802	0.402953	11.8165	0.0542699	1.18816	0.100551	340.683	3.94278	343.787	34.4743	365.783	265.838	340.683	3.94278	93.1381
071920BK-01_ 177	659.534	917.308	1.84135	16.1245	8.78139	0.183181	19.0968	0.0275582	1.27581	0.0668077	175.248	2.20571	170.794	30.0294	110.584	NA	175.248	2.20571	158.475
071920BK-01_ 178	1047.55	878.099	1.07134	15.7057	9.21631	0.099589	19.8655	0.0147528	2.07035	0.104218	94.408	1.94033	96.3969	18.2708	146.929	NA	94.408	1.94033	64.2543
071920BK-01_ 180	248.737	397.922	3.81711	9.68946	14.2309	0.294663	32.2519	0.030643	3.94413	0.122291	194.572	7.5595	262.223	74.6683	921.671	674.749	194.572	7.5595	21.1107
071920BK-01_ 181	454.631	1563.4	2.37697	17.2837	5.68694	0.405044	15.6475	0.0583006	0.862968	0.0551504	365.283	3.06462	345.3	45.8335	213.965	NA	365.283	3.06462	170.72
071920BK-01_ 182	318.941	488.009	2.48642	10.8824	13.0128	0.25194	21.4497	0.0282329	2.61675	0.121994	179.479	4.63174	228.151	43.8566	766.151	453.306	179.479	4.63174	23.4261
071920BK-01_ 183	5030.16	3225.6	4.07608	19.0125	2.75006	0.0962959	4.92582	0.0140762	0.970003	0.196922	90.1084	0.867974	93.3514	4.3933	178.028	112.666	90.1084	0.867974	50.6148
071920BK-01_ 184	306.842	825.846	2.16187	9.46713	17.3016	0.36344	19.2285	0.0287932	2.23236	0.116097	182.991	4.02758	314.78	52.0897	1458.81	366.451	182.991	4.02758	12.5439
071920BK-01_ 185	806.55	766.844	1.46568	11.843	12.5414	0.151634	17.1616	0.0162344	1.41962	0.0827207	103.813	1.46195	143.353	22.9479	861.555	357.335	103.813	1.46195	12.0495
071920BK-01_ 186	629.52	552.959	3.32119	12.8991	10.976	0.106192	25.3262	0.0146462	2.352	0.0928679	93.7308	2.1886	102.476	24.6916	311.95	NA	93.7308	2.1886	30.0467
071920BK-01_ 187	4284.34	6633.59	1.44515	19.5774	3.13789	0.121948	4.21864	0.0175385	0.858979	0.203615	112.08	0.954427	116.836	4.65594	215.838	95.67	112.08	0.954427	51.928
071920BK-01_ 188	1722.01	919.126	3.04866	13.9449	9.34107	0.0850202	18.1335	0.0107438	3.45988	0.1908	68.8893	2.3708	82.8538	14.4287	507.675	394.294	68.8893	2.3708	13.5696
071920BK-01_ 189	1211.06	919.347	6.83394	13.6436	10.6623	0.0912197	15.6383	0.0112901	2.44543	0.156375	72.3727	1.75992	88.639	13.2745	553.19	338.894	72.3727	1.75992	13.0828
071920BK-01_ 190	1629.77	3290.22	3.34678	18.8472	3.56466	0.220232	5.4711	0.0322241	0.770719	0.140871	204.453	1.55103	202.103	10.0267	175.757	126.422	204.453	1.55103	116.327
071920BK-01_ 191	591.275	539.181	3.63307	10.9013	18.5618	0.145166	30.5009	0.0158852	2.34398	0.0768495	101.598	2.36277	137.635	39.2786	816.099	649.922	101.598	2.36277	12.4492
071920BK-01_ 192	485.948	583.392	1.64213	10.8495	20.0099	0.134308	29.9733	0.0141431	2.07578	0.0692544	90.5338	1.86615	127.962	36.0512	895.853	630.675	90.5338	1.86615	10.1059
071920BK-01_ 193	581.553	1063.76	1.66262	14.833	10.2214	0.236029	17.2665	0.0312653	1.39797	0.0809646	198.463	2.73218	215.164	33.491	403.071	387.97	198.463	2.73218	49.2376
071920BK-01_ 194	536.374	569.884	2.85957	12.0087	11.712	0.114778	29.2948	0.0141449	2.77775	0.0948206	90.5451	2.49754	110.327	30.6353	562.527	NA	90.5451	2.49754	16.0961
071920BK-01_ 197	527.915	1599.11	2.40959	15.3643	5.06168	0.453469	11.7381	0.057796	0.888751	0.0757152	362.208	3.13036	379.706	37.2017	488.813	259.009	362.208	3.13036	74.0995
071920BK-01_ 198	664.077	1922.13	1.41556	15.2752	7.6705	0.233181	9.30827	0.0287354	1.12578	0.120944	182.629	2.02714	212.822	17.8735	562.625	201.703	182.629	2.02714	32.4601
071920BK-01_ 199	3849.97	5272.22	2.05666	19.3565	3.09321	0.103827	3.47336	0.0151582	0.691141	0.198983	96.9827	0.66527	100.303	3.31734	180.931	79.3511	96.9827	0.66527	53.602
071920BK-01_ 200	1040.92	1358.62	5.07982	14.958	6.78103	0.120872	15.2408	0.0154181	1.10961	0.072805	98.6332	1.08611	115.862	16.6896	487.016	337.224	98.6332	1.08611	20.2526
071920BK-01_ 201	938.559	1199.35	1.50174	14.3576	7.78616	0.137533	11.4319	0.0171189	1.59062	0.139139	109.421	1.72579	130.845	14.0352	540.837	248.257	109.421	1.72579	20.2318
071920BK-01_ 202	1521.42	1778.21	2.5138	13.997	13.7091	0.11472	14.6742	0.0130106	1.1755	0.0801065	83.3308	0.973249	110.274	15.3352	740.874	310.969	83.3308	0.973249	11.2476
071920BK-01_ 203	865.401	1150.76	2.05903	13.1056	8.92172	0.146039	16.2688	0.0163936	1.24671	0.0766318	104.823	1.29628	138.408	21.0532	762.518	344.043	104.823	1.29628	13.747
071920BK-01_ 204	114.64	243.312	5.54599	6.67171	39.405	0.417401	42.5977	0.0322078	3.92743	0.0921983	204.351	7.89988	354.191	128.047	1508.76	841.437	204.351	7.89988	13.5443
071920BK-01_ 205	925.797	26070.6	72.8904	5.33332	0.595821	13.952	0.974914	0.533728	0.758019	0.777525	2757.14	17.0048	2746.46	9.2373	2739.31	10.0838	2739.31	10.0838	100.651
071920BK-01_ 207	1612.59	1651.41	0.435051	15.0677	10.9617	0.132968	16.5256	0.0165315	9.22374	0.558149	105.698	9.6698	126.761	19.6957	543.364	301	105.698	9.6698	19.4525
071920BK-01_ 208	526.169	780.61	4.84347	14.76	12.8214	0.194732	25.5811	0.0283368	9.28765	0.363067	180.131	16.4984	180.659	42.361	188.562	NA	180.131	16.4984	95.5284
071920BK-01_ 209	203.777	234.495	2.60496	10.3115	16.1318	0.109653	175.179	0.0236874	9.49664	0.0542112	150.918	14.1657	105.648	177.557	NA	NA	150.918	14.1657
071920BK-01_ 210	667.126	629.455	2.98931	10.8769	13.9833	0.135707	22.8382	0.0139678	9.31565	0.407897	89.4194	8.2725	129.213	27.7163	942.817	431.662	89.4194	8.2725	9.48428
071920BK-01_ 211	392.969	7935.19	1.13138	8.07806	8.68513	5.91585	12.6619	0.344691	9.16944	0.724173	1909.2	151.547	1963.56	110.41	2022.11	155.029	2022.11	155.029	94.416
071920BK-01_ 212	944.159	3265.35	1.09694	16.8294	9.17572	0.440886	14.8352	0.0571192	9.18931	0.619426	358.082	32.0083	370.877	46.1231	452.57	259.345	358.082	32.0083	79.1219
071920BK-01_ 213	900.299	468.87	1.80031	10.6136	13.8316	0.0872053	27.8723	0.00979938	9.6518	0.346286	62.8634	6.03796	84.8966	22.7042	760.342	560.383	62.8634	6.03796	8.26777
071920BK-01_ 214	984.301	1681.53	1.22531	15.1896	5.55174	0.23231	11.7283	0.028929	1.28916	0.109918	183.842	2.33654	212.104	22.4536	539.84	255.738	183.842	2.33654	34.0549
071920BK-01_ 215	190.555	744.449	1.58229	12.9877	10.8505	0.534696	18.1228	0.0662369	2.00034	0.110377	413.444	8.01067	434.922	64.1974	551.242	396.119	413.444	8.01067	75.0023
071920BK-01_ 216	579.637	995.501	1.3475	16.4836	6.58628	0.274262	16.5231	0.0425984	1.12036	0.0678059	268.919	2.9509	246.096	36.1253	34.7063	NA	268.919	2.9509	774.842
071920BK-01_ 217	2042.18	1710.26	2.90561	18.219	5.74375	0.101637	7.87756	0.0156473	1.11922	0.142077	100.088	1.11156	98.2861	7.37975	55.803	NA	100.088	1.11156	179.36
071920BK-01_ 218	1067.84	984.523	3.41494	15.771	6.13339	0.0975885	15.8024	0.0142909	1.73439	0.109755	91.4733	1.5753	94.5479	14.2672	173.818	NA	91.4733	1.5753	52.6259
071920BK-01_ 219	312.67	566.676	2.24332	12.1668	9.75883	0.265344	14.1655	0.0330679	2.39792	0.169278	209.721	4.94801	238.964	30.1711	538.16	306.769	209.721	4.94801	38.9699
071920BK-01_ 220	1335.86	5329.73	0.63852	17.5626	2.746	0.551405	3.90222	0.0715949	0.961975	0.24652	445.757	4.14318	445.917	14.0836	447.684	84.0811	445.757	4.14318	99.5696
071920BK-01_ 221	402.559	856.301	3.5073	14.3467	5.44545	0.213321	22.8252	0.0285448	2.2478	0.098479	181.434	4.02143	196.335	40.7695	380.354	NA	181.434	4.02143	47.7014
071920BK-01_ 222	775.904	717.372	3.72568	12.5149	15.7593	0.127442	28.2877	0.015037	1.63572	0.0578245	96.2128	1.56209	121.797	32.4784	656.59	617.194	96.2128	1.56209	14.6534
071920BK-01_ 223	442.124	603.644	2.72182	10.6907	12.9884	0.158977	33.6617	0.0161864	3.89303	0.115652	103.509	3.99746	149.807	46.9173	965.013	701.921	103.509	3.99746	10.7262
071920BK-01_ 224	349.939	1102.35	1.88389	12.9688	10.3508	0.512636	11.1902	0.0563479	1.28868	0.115161	353.377	4.43132	420.22	38.5256	806.715	233.339	353.377	4.43132	43.8045
071920BK-01_ 225	504.819	462.214	2.47128	10.001	16.6274	0.133869	44.3356	0.0136703	3.78356	0.0853389	87.5273	3.28927	127.568	53.1983	958.959	949.679	87.5273	3.28927	9.12732
071920BK-01_ 226	622.955	1001.71	2.7828	13.9176	11.2829	0.244069	26.4314	0.0299694	1.15687	0.0437687	190.357	2.16998	221.747	52.6997	570.473	583.943	190.357	2.16998	33.3682
071920BK-01_ 227	573.481	1469.1	2.24214	13.0983	9.7441	0.291727	16.2139	0.03085	1.84358	0.113704	195.866	3.55664	259.918	37.1977	887.161	334.954	195.866	3.55664	22.0778
071920BK-01_ 228	623.484	708.971	3.01214	12.9451	12.2732	0.116741	23.7212	0.0144264	2.34675	0.0989302	92.3344	2.15141	112.113	25.1841	556.545	521.476	92.3344	2.15141	16.5906
071920BK-01_ 229	257.696	496.492	2.93974	12.4818	11.629	0.246311	37.7295	0.0340471	2.61389	0.0692797	215.828	5.54811	223.575	75.8534	306.89	NA	215.828	5.54811	70.3276
071920BK-01_ 230	1694.53	790.352	5.38918	12.8995	11.8605	0.100222	31.9401	0.0118444	0.885531	0.0277248	75.9054	0.668224	96.9812	29.5509	653.099	702.01	75.9054	0.668224	11.6223
071920BK-01_ 231	1122.07	1407.22	2.37707	13.5363	10.5435	0.143394	13.4815	0.015752	1.90583	0.141366	100.752	1.90524	136.063	17.169	807.997	280.424	100.752	1.90524	12.4694
071920BK-01_ 232	878.837	1827.67	4.08643	15.9751	4.70925	0.272064	8.73213	0.0348098	1.22024	0.139741	220.581	2.64608	244.343	18.9655	480.242	191.382	220.581	2.64608	45.9313
071920BK-01_ 234	803.033	600.651	4.39314	12.736	13.3481	0.107326	21.7535	0.0138477	1.74884	0.0803936	88.6556	1.53983	103.516	21.4118	461.679	485.769	88.6556	1.53983	19.2029
071920BK-01_ 235	2003.75	1285.61	2.64065	16.8059	4.5057	0.10366	10.3297	0.0150786	1.02587	0.0993132	96.4772	0.982363	100.149	9.85158	189.447	NA	96.4772	0.982363	50.9256
071920BK-01_ 236	442.529	1139.97	2.29952	13.5079	8.78012	0.276674	18.4868	0.0315218	1.95133	0.105553	200.066	3.84398	248.016	40.7017	731.242	392.582	200.066	3.84398	27.3597
071920BK-01_ 237	410.727	692.358	1.29954	13.001	10.1972	0.255828	22.3164	0.0320038	2.06532	0.0925474	203.077	4.12882	231.299	46.1924	529.816	492.38	203.077	4.12882	38.3297
071920BK-01_ 238	2001.28	1815.36	2.07659	15.7072	5.80066	0.118762	13.0092	0.014788	1.11193	0.085473	94.6315	1.04455	113.949	14.0232	539.998	284.575	94.6315	1.04455	17.5244
071920BK-01_ 239	763.811	609.731	1.4001	14.1987	12.4679	0.100139	26.0793	0.0150168	1.89008	0.0724743	96.085	1.80261	96.9049	24.1082	118.136	NA	96.085	1.80261	81.3344
071920BK-01_ 240	451.273	724.621	2.0402	13.6611	12.1196	0.21715	32.7657	0.0283787	1.73943	0.0530868	180.393	3.09431	199.535	59.4239	433.238	NA	180.393	3.09431	41.6383
071920BK-01_ 241	646.675	524.942	3.42594	12.2331	8.00264	0.115443	41.0125	0.0148456	2.87713	0.0701526	94.9973	2.71316	110.932	43.1249	469.056	NA	94.9973	2.71316	20.2529
071920BK-01_ 242	589.914	353.965	2.91383	8.86645	15.3787	0.116626	35.0881	0.0111582	2.86254	0.0815816	71.5319	2.03631	112.008	37.2281	1090.79	722.63	71.5319	2.03631	6.55783
071920BK-01_ 244	844.007	820.633	3.45263	11.9229	13.4205	0.146094	21.4932	0.0151327	0.921645	0.0428807	96.8212	0.88568	138.458	27.8262	929.813	445.726	96.8212	0.88568	10.413
071920BK-01_ 245	1060.6	3221.36	1.56762	17.2923	3.40947	0.430783	7.54215	0.055469	0.622843	0.0825816	348.011	2.11009	363.733	23.0614	466.205	166.705	348.011	2.11009	74.6476
071920BK-01_ 246	303.963	625.185	3.91474	9.88553	14.2311	0.269358	29.2431	0.0235509	3.5085	0.119977	150.059	5.20401	242.18	63.0897	1268.89	578.95	150.059	5.20401	11.826
071920BK-01_ 247	554.018	758.321	3.89256	9.88641	18.2936	0.156078	21.2164	0.0129752	3.55093	0.167368	83.1056	2.93208	147.264	29.092	1366.66	407.164	83.1056	2.93208	6.08091
071920BK-01_ 248	308.172	1238.36	2.76237	15.8965	6.77663	0.433601	14.5237	0.0582581	1.41963	0.0977457	365.023	5.03801	365.73	44.6324	371.174	327.005	365.023	5.03801	98.343
071920BK-01_ 249	380.626	691.465	2.8164	12.9356	9.99151	0.238166	25.864	0.0289186	1.75478	0.0678467	183.776	3.17935	216.918	50.5574	594.799	567.902	183.776	3.17935	30.8972
071920BK-01_ 250	540.062	1878.23	1.79592	17.688	3.56365	0.41458	6.28533	0.0580036	0.892261	0.141959	363.473	3.15339	352.168	18.7063	279.307	142.526	363.473	3.15339	130.134
071920BK-01_ 251	277.747	3890.31	1.57986	9.0969	1.13488	5.13274	1.97704	0.328645	0.933358	0.472098	1831.81	14.8828	1841.54	16.8027	1853.32	31.5064	1853.32	31.5064	98.8393
071920BK-01_ 252	330.354	524.919	2.01897	12.8199	9.73014	0.232762	18.8546	0.0316418	2.67852	0.142062	200.815	5.29596	212.477	36.163	344.799	NA	200.815	5.29596	58.2413
071920BK-01_ 253	876.02	762.678	3.04844	13.9331	8.63804	0.090318	17.805	0.0117158	2.25517	0.126659	75.0859	1.68349	87.7995	14.977	449.8	395.086	75.0859	1.68349	16.6932
071920BK-01_ 254	1329.46	1439.41	1.66851	14.5731	5.02735	0.128451	15.8198	0.0149619	1.27917	0.0808591	95.736	1.21558	122.705	18.2866	684.211	338.587	95.736	1.21558	13.9922
071920BK-01_ 255	213.496	351.783	3.28597	11.3294	15.5948	0.201955	47.5951	0.0297295	3.22216	0.0676994	188.855	5.99695	186.779	81.3742	161.626	NA	188.855	5.99695	116.847
071920BK-01_ 256	860.088	827.512	1.28498	12.4711	8.61654	0.139711	27.0469	0.0151875	2.58952	0.0957419	97.1687	2.49734	132.786	33.6777	829.874	571.28	97.1687	2.49734	11.7088
071920BK-01_ 257	1433.67	1175.97	2.67447	16.8981	5.70661	0.0826477	10.2841	0.0120945	2.58567	0.251424	77.4983	1.99185	80.6312	7.97165	175.462	NA	77.4983	1.99185	44.1683
071920BK-01_ 258	706.888	1724.27	2.64831	16.1424	5.54891	0.21502	15.0176	0.0273852	1.3674	0.091053	174.162	2.34961	197.757	26.9916	490.397	331.547	174.162	2.34961	35.5145
071920BK-01_ 259	289.099	1061.78	2.20145	15.1097	5.52224	0.440246	14.2219	0.0572029	0.95606	0.0672246	358.592	3.33475	370.426	44.1692	446.092	316.802	358.592	3.33475	80.3852
071920BK-01_ 260	1031.22	688.336	2.78076	10.5515	6.10334	0.127989	12.6877	0.0117694	2.60093	0.204996	75.4274	1.95038	122.289	14.6188	1169.74	246.803	75.4274	1.95038	6.44823
071920BK-01_ 261	466.999	592.097	2.43145	8.46628	12.2079	0.221613	25.2007	0.0159385	2.74082	0.108759	101.936	2.77191	203.251	46.4523	1640.47	472.666	101.936	2.77191	6.21381
071920BK-01_ 262	188.045	338.071	1.82688	6.64144	31.4138	0.48613	40.0743	0.0300179	4.74666	0.118447	190.66	8.91748	402.27	133.874	1918.62	746.159	190.66	8.91748	9.93737
071920BK-01_ 263	174.656	259.082	2.05867	10.8419	13.6014	0.141258	96.5326	0.027975	5.70205	0.0590687	177.862	10.0032	134.163	121.902	NA	NA	177.862	10.0032
071920BK-01_ 264	209.418	368.385	1.53437	12.6181	10.7854	0.139828	41.7773	0.0245599	2.82243	0.0675589	156.41	4.36145	132.89	52.0841	NA	NA	156.41	4.36145
071920BK-01_ 265	349.989	218.479	2.51259	6.37074	28.6619	0.135296	35.2501	0.00987772	8.24346	0.233856	63.3634	5.19775	128.845	42.6797	1612.56	658.85	63.3634	5.19775	3.92936
071920BK-01_ 266	751.805	535.03	2.22756	9.84649	12.9077	0.138658	30.1351	0.0126056	3.00047	0.0995675	80.7532	2.40787	131.848	37.2776	1192.34	605.353	80.7532	2.40787	6.77265
071920BK-01_ 267	547.514	1128.72	1.72744	13.5194	9.13468	0.263254	14.0629	0.0293334	1.4194	0.100933	186.375	2.60754	237.286	29.7655	778.128	295.506	186.375	2.60754	23.9517
071920BK-01_ 268	292.843	732.433	2.4937	13.8797	7.8212	0.402333	31.8162	0.0530523	1.56748	0.0492668	333.234	5.09068	343.339	92.9445	413.264	NA	333.234	5.09068	80.6346
071920BK-01_ 269	289.787	203.108	2.42369	3.81082	26.8394	0.330669	33.3451	0.0111307	7.14827	0.214372	71.357	5.07266	290.076	84.33	2947.76	542.702	71.357	5.07266	2.42072
071920BK-01_ 270	625.792	569.585	2.6464	13.0688	11.8785	0.119896	24.9269	0.0162421	2.40649	0.0965422	103.862	2.47941	114.978	27.1036	352.622	NA	103.862	2.47941	29.4543
071920BK-01_ 271	126.634	351.172	3.41021	8.29161	27.608	0.387712	32.6979	0.0331479	3.86461	0.118191	210.22	7.99314	332.697	93.0192	1312.49	647.234	210.22	7.99314	16.0169
071920BK-01_ 272	265.918	247.909	2.95279	9.66987	10.7057	0.0929889	24.7803	0.0146568	5.15354	0.20797	93.7981	4.79893	90.2838	21.4099	NA	NA	93.7981	4.79893
071920BK-01_ 273	1355.53	1445.57	1.93184	18.1346	7.66346	0.09772	23.5084	0.014952	1.43764	0.0611542	95.6733	1.36528	94.6696	21.2524	70.4834	NA	95.6733	1.36528	135.739
071920BK-01_ 274	230.135	184.242	4.42426	6.29524	12.2912	0.164176	46.0566	0.0137982	3.68604	0.0800329	88.3408	3.23407	154.352	66.0426	1345.62	939.07	88.3408	3.23407	6.56506
071920BK-01_ 275	262.161	932.436	6.78924	14.3866	8.22456	0.433715	12.8432	0.0556805	1.72744	0.134502	349.303	5.87342	365.811	39.4696	472.806	282.584	349.303	5.87342	73.8787
071920BK-01_ 276	2015.27	2138.47	3.19671	15.9564	9.93137	0.124018	12.9012	0.0153521	1.1432	0.0886117	98.214	1.11427	118.709	14.4545	552.814	281.472	98.214	1.11427	17.7662
071920BK-01_ 277	917.984	473.162	5.27542	14.1245	6.08869	0.0638549	56.2715	0.0112396	2.20998	0.0392735	72.0511	1.58345	62.8512	34.308	NA	NA	72.0511	1.58345
071920BK-01_ 278	1439.46	1020.17	2.65983	15.7116	10.0951	0.107175	17.0059	0.0149947	1.37075	0.0806045	95.9442	1.30542	103.378	16.7165	279.324	NA	95.9442	1.30542	34.3487
071920BK-01_ 279	580.099	613.059	3.02071	11.6216	12.5682	0.104403	19.315	0.0113996	3.43569	0.177877	73.071	2.49632	100.833	18.5421	820.685	400.35	73.071	2.49632	8.90366
071920BK-01_ 280	383.937	1753.36	1.50963	14.82	7.34729	0.502057	9.96378	0.0577959	1.26751	0.127212	362.208	4.46442	413.094	33.8284	709.206	210.621	362.208	4.46442	51.0722
071920BK-01_ 281	1404.24	937.3	5.16237	12.1788	10.4451	0.111283	15.7758	0.0113636	1.24181	0.078716	72.8417	0.899461	107.138	16.0421	958.997	323.28	72.8417	0.899461	7.59561
071920BK-01_ 282	469.838	415.801	5.27994	9.49031	19.6518	0.129092	41.638	0.0124062	4.09956	0.0984573	79.4834	3.23847	123.282	48.3748	1081.87	869.104	79.4834	3.23847	7.34684
071920BK-01_ 283	173.25	1848.57	2.25464	13.2932	5.46418	1.71994	8.34568	0.173801	0.948763	0.113683	1033.02	9.05597	1016	53.6351	980.364	169.149	980.364	169.149	105.371
071920BK-01_ 284	513.988	1113.08	2.24618	15.8713	5.31057	0.227778	17.2923	0.0312272	1.0718	0.0619816	198.224	2.09224	208.363	32.5854	325.614	NA	198.224	2.09224	60.8771
071920BK-01_ 285	771.494	867.141	0.925144	11.8232	8.84641	0.146696	15.6604	0.0147292	2.36252	0.15086	94.2578	2.21066	138.991	20.3451	993.404	316.501	94.2578	2.21066	9.48836
071920BK-01_ 287	599.53	1187.95	2.24551	13.6334	7.63008	0.259705	11.2043	0.0289964	1.08552	0.0968842	184.264	1.97191	234.43	23.4588	773.888	235.317	184.264	1.97191	23.8102
071920BK-01_ 288	1435.13	2599.91	3.78494	16.7355	8.67714	0.200753	10.8392	0.0253221	0.890184	0.0821266	161.204	1.41722	185.763	18.4027	511.688	238.009	161.204	1.41722	31.5044
071920BK-01_ 289	708.704	1756.39	3.36726	16.4251	3.80381	0.23614	9.73677	0.0306954	2.18646	0.224557	194.899	4.19762	215.255	18.8885	445.162	211.329	194.899	4.19762	43.7817
071920BK-01_ 290	722.753	2283.72	1.95223	16.3777	4.24104	0.324841	8.32527	0.0405857	0.939069	0.112797	256.462	2.36108	285.619	20.7298	532.594	181.43	256.462	2.36108	48.1533
071920BK-01_ 291	896.345	840.835	3.58904	14.8409	6.01546	0.113899	25.1961	0.0155952	2.84682	0.112987	99.7574	2.81805	109.526	26.1658	328.469	NA	99.7574	2.81805	30.3704
071920BK-01_ 293	673.858	544.708	7.15967	10.5674	16.773	0.128154	20.5126	0.0128265	4.12092	0.200897	82.1589	3.36422	122.438	23.6644	999.879	412.084	82.1589	3.36422	8.21689
071920BK-01_ 294	776.334	684.032	4.95951	11.9916	9.64309	0.139784	24.0486	0.0153451	2.69111	0.111903	98.1696	2.62184	132.852	29.9559	809.405	506.785	98.1696	2.62184	12.1286
071920BK-01_ 295	940.942	755.837	5.85898	12.451	12.8799	0.10251	24.3906	0.0114474	2.51296	0.10303	73.3755	1.83345	99.0908	23.0309	773.514	517.662	73.3755	1.83345	9.486
071920BK-01_ 296	1542.1	2213.77	1.57561	18.0692	3.30783	0.311785	11.3936	0.0436966	2.21556	0.194456	275.706	5.97965	275.563	27.5036	275.329	256.725	275.706	5.97965	100.137
071920BK-01_ 297	402.839	663.965	1.85123	13.3073	11.5776	0.226467	15.6165	0.0291102	1.81223	0.116046	184.977	3.30458	207.278	29.2875	470.009	345.196	184.977	3.30458	39.3561
071920BK-01_ 299	436.837	412.007	4.11595	9.80678	7.52924	0.114009	36.2286	0.0116103	6.13895	0.169451	74.4134	4.54194	109.626	37.6643	964.614	752.71	74.4134	4.54194	7.71431
071920BK-01_ 300	208.907	656.774	2.05618	13.9204	14.0061	0.409985	18.4222	0.0565541	1.5096	0.0819445	354.635	5.20896	348.864	54.4428	311.622	NA	354.635	5.20896	113.803
071920BK-01_ 301	422.926	693.307	46.463	13.9399	7.89068	0.220044	15.1225	0.029708	1.55349	0.102727	188.721	2.88925	201.946	27.7009	360.278	341.102	188.721	2.88925	52.382
071920BK-01_ 302	375.476	865.659	2.20542	11.6456	17.1348	0.290971	19.1654	0.0286557	1.40987	0.0735634	182.13	2.53185	259.324	43.8885	1032.59	389.671	182.13	2.53185	17.6381
071920BK-01_ 303	552.273	1453.26	1.77254	15.3723	6.36901	0.23133	12.5034	0.0286761	1.85016	0.147972	182.257	3.32483	211.296	23.856	549.75	270.932	182.257	3.32483	33.1527
071920BK-01_ 304	826.792	1006.56	1.42079	12.8308	12.7034	0.139474	17.11	0.0149588	1.84359	0.107749	95.7165	1.75158	132.576	21.2683	857.913	355.588	95.7165	1.75158	11.1569
071920BK-01_ 305	161.357	4608.91	1.56484	9.00315	1.5935	5.25233	2.25754	0.331181	1.05324	0.466543	1844.1	16.8917	1861.15	19.2587	1881.02	35.9759	1881.02	35.9759	98.0375
071920BK-01_ 306	893.747	3027.43	1.64781	17.8669	3.79889	0.558471	7.19566	0.0744682	0.832354	0.115675	463.019	3.71881	450.531	26.1878	388.235	160.676	463.019	3.71881	119.263
071920BK-01_ 307	861.08	2088.42	6.59853	17.2843	2.18146	0.430419	4.63664	0.0577271	1.02993	0.222129	361.788	3.62354	363.474	14.1674	375.201	101.781	361.788	3.62354	96.425
071920BK-01_ 308	286.976	2906.57	3.39458	12.8316	3.99266	1.95991	4.31937	0.18296	0.744995	0.172478	1083.12	7.42775	1101.85	29.0487	1139.9	84.6317	1139.9	84.6317	95.0192
071920BK-01_ 309	170.861	159.243	119.637	6.33178	25.5556	0.147411	48.7707	0.0148668	7.8783	0.161538	95.1324	7.43979	139.623	63.7043	984.37	1041.99	95.1324	7.43979	9.6643
071920BK-01_ 310	1971.22	3479.64	4.04804	18.9578	3.16721	0.182255	5.55553	0.0256129	0.930812	0.167547	163.032	1.4985	169.999	8.6963	269.072	125.688	163.032	1.4985	60.5905
071920BK-01_ 311	85.7259	1108.58	1.87257	10.9086	5.8915	2.19753	12.119	0.189836	1.18714	0.097957	1120.49	12.2099	1180.26	84.7665	1292.38	235.46	1292.38	235.46	86.6997
071920BK-01_ 312	437.674	939.816	2.47153	12.2966	5.10077	0.303918	8.44966	0.0313958	2.21812	0.26251	199.279	4.35261	269.456	20	935.323	167.497	199.279	4.35261	21.3059
071920BK-01_ 313	930.517	2637.68	2.72724	17.616	3.65895	0.395605	8.45813	0.0535372	0.82643	0.0977083	336.201	2.70726	338.455	24.3493	354.961	190.422	336.201	2.70726	94.715
071920BK-01_ 314	509.613	1521.21	1.71001	17.3734	4.50247	0.364911	7.48235	0.0528129	0.788385	0.105366	331.768	2.54945	315.875	20.3146	201.216	172.96	331.768	2.54945	164.882
071920BK-01_ 315	609.354	800.435	2.4978	12.2426	11.413	0.163925	27.4824	0.0178564	2.73831	0.0996387	114.094	3.09677	154.133	39.3207	825.577	580.978	114.094	3.09677	13.8199
071920BK-01_ 316	160.082	575.029	4.41942	9.70397	17.8299	0.398211	31.3843	0.0351963	3.65633	0.116502	222.989	8.0138	340.35	91.0004	1247.73	625.568	222.989	8.0138	17.8716
071920BK-01_ 317	318.891	750.842	2.85308	9.54467	16.2755	0.373844	18.8795	0.030097	6.00641	0.318145	191.155	11.313	322.498	52.2102	1428.2	344.454	191.155	11.313	13.3843
071920BK-01_ 318	656.742	956.384	1.53971	15.6818	4.37519	0.393631	31.1473	0.0564372	0.865037	0.0277725	353.922	2.97903	337.018	89.5603	222.994	NA	353.922	2.97903	158.713
071920BK-01_ 319	540.039	510.542	1.56492	10.6115	15.6617	0.134625	39.1372	0.014275	2.57904	0.0658974	91.372	2.3399	128.245	47.185	881.533	839.32	91.372	2.3399	10.3651
071920BK-01_ 320	547.808	510.788	3.56816	12.8074	10.9439	0.109782	26.2816	0.0156003	3.20875	0.122091	99.7897	3.17735	105.766	26.4043	243.595	NA	99.7897	3.17735	40.9655
071920BK-01_ 321	1773.58	3176.14	3.31672	18.4665	2.2127	0.295508	4.73871	0.0417584	0.683427	0.144222	263.723	1.76599	262.886	10.9758	256.447	107.836	263.723	1.76599	102.837
071920BK-01_ 322	638.456	1937.17	2.66225	6.43596	2.20798	1.32942	2.81072	0.062557	1.01563	0.361341	391.157	3.85458	858.627	16.2892	2392.97	44.6057	391.157	3.85458	16.3461
071920BK-01_ 323	597.1	582.211	2.19348	12.5939	12.2334	0.11646	22.9447	0.0150722	1.61124	0.0702227	96.4364	1.54225	111.858	24.3069	454.933	NA	96.4364	1.54225	21.1979
071920BK-01_ 324	1551.32	1352.34	2.1344	15.9724	5.36397	0.1115	8.71071	0.015132	0.993876	0.114098	96.8164	0.955046	107.337	8.8728	348.592	195.993	96.8164	0.955046	27.7736
071920BK-01_ 325	378.364	302.57	5.0647	8.47793	15.1464	0.125926	46.0755	0.01253	4.2592	0.0924397	80.2716	3.39773	120.43	52.3708	1011.73	983.067	80.2716	3.39773	7.93408
071920BK-01_ 326	338.661	373.419	1.91801	11.0458	15.1107	0.106999	45.4067	0.0146806	3.46128	0.0762283	93.949	3.22825	103.217	44.5926	323.854	NA	93.949	3.22825	29.0097
071920BK-01_ 327	120.256	225.718	2.65832	6.06839	21.7301	0.468337	24.2381	0.031597	6.06999	0.250432	200.536	11.9851	390.039	78.6554	1758.26	435.394	200.536	11.9851	11.4054
071920BK-01_ 328	636.812	1638.24	1.95632	14.2737	8.77307	0.251265	14.1917	0.0289191	1.38754	0.0977715	183.78	2.51401	227.603	28.9444	709.695	301.673	183.78	2.51401	25.8956
071920BK-01_ 329	771.154	665.516	2.72087	13.6581	10.3001	0.106711	19.9104	0.0147642	2.12766	0.106862	94.4802	1.99556	102.952	19.4957	304.798	NA	94.4802	1.99556	30.9977
071920BK-01_ 330	753.025	953.654	7.09407	14.3425	7.57588	0.0995415	19.7626	0.0129523	2.1661	0.109606	82.9599	1.78548	96.3531	18.1683	442.914	440.654	82.9599	1.78548	18.7305
071920BK-01_ 331	405.872	426.719	3.55446	11.9854	14.476	0.10355	59.8461	0.0149805	3.39359	0.0567052	95.8545	3.22884	100.048	57.0796	202.182	NA	95.8545	3.22884	47.41
071920BK-01_ 332	474.891	1491.73	6.81522	16.9414	4.67583	0.384756	8.64363	0.0553572	1.14156	0.132069	347.328	3.86004	330.531	24.3906	214.912	198.743	347.328	3.86004	161.614
071920BK-01_ 333	459.135	393.325	7.42768	7.61751	23.3802	0.160534	26.2823	0.0118956	1.82792	0.0695496	76.2317	1.38525	151.17	36.9311	1584.84	499.028	76.2317	1.38525	4.81005
071920BK-01_ 334	1786.18	2200.84	2.35155	18.2165	4.46368	0.100663	9.61842	0.0149163	1.39406	0.144936	95.4466	1.32078	97.3879	8.93222	146.228	NA	95.4466	1.32078	65.2723
071920BK-01_ 335	829.259	621.035	1.25172	13.0043	9.06817	0.107903	34.3007	0.0144564	2.6625	0.0776224	92.5249	2.44588	104.046	33.9334	377.597	NA	92.5249	2.44588	24.5036
071920BK-01_ 336	361.183	4018.82	2.33422	13.3588	3.34785	1.67678	4.82206	0.167931	0.726396	0.15064	1000.7	6.73293	999.761	30.6802	998.568	96.89	998.568	96.89	100.213
071920BK-01_ 337	1336.61	297.612	1.12236	9.91548	1.94708	0.448201	22.1609	0.061962	1.54863	0.0698812	387.547	5.82483	376.019	69.75	306.592	NA	387.547	5.82483	126.405
071920BK-01_ 338	123.053	207.914	2.50432	5.52429	24.1794	0.474531	31.1157	0.0290809	4.62978	0.148792	184.793	8.43408	394.314	102.018	1932.17	565.357	184.793	8.43408	9.56403
071920BK-01_ 339	434.936	1438.02	2.19067	16.3159	3.85066	0.40455	13.7708	0.0560678	1.14381	0.0830608	351.667	3.91466	344.943	40.295	300.905	NA	351.667	3.91466	116.87
071920BK-01_ 340	389.692	275.699	1.86941	9.03404	20.4546	0.0886666	28.8103	0.0108563	3.96274	0.137546	69.6067	2.7435	86.2605	23.8299	576.671	632.189	69.6067	2.7435	12.0704
071920BK-01_ 341	146.56	194.499	2.38281	5.60634	27.0341	0.301428	40.9687	0.0197074	5.9579	0.145426	125.807	7.42278	267.515	96.6393	1815.5	770.608	125.807	7.42278	6.92961
071920BK-01_ 342	467.777	1271.41	1.66784	15.5053	5.56012	0.45167	6.5364	0.0603567	0.845421	0.12934	377.794	3.10216	378.448	20.6529	383.409	145.8	377.794	3.10216	98.5357
071920BK-01_ 343	178.057	401.612	3.79297	8.92014	10.0545	0.281932	29.8546	0.0260202	4.41911	0.148021	165.592	7.22449	252.189	66.7645	1162.51	598.204	165.592	7.22449	14.2443
071920BK-01_ 344	1733.67	1760.38	2.31137	16.3367	6.04055	0.125443	11.4293	0.0168224	0.847397	0.0741422	107.542	0.90375	119.995	12.936	375.455	257.219	107.542	0.90375	28.6432
071920BK-01_ 345	56.6846	940.055	0.716218	9.30837	7.35404	3.647	8.63011	0.279042	1.72376	0.199738	1586.53	24.2427	1559.85	68.877	1524.72	159.642	1524.72	159.642	104.054
071920BK-01_ 346	250.871	588.672	3.56769	11.9304	11.8599	0.280722	14.8036	0.0336618	2.16054	0.145947	213.425	4.53564	251.23	32.9588	621.843	317.452	213.425	4.53564	34.3215
071920BK-01_ 347	177.629	154.344	2.8193	4.13709	30.0083	0.276345	36.503	0.0122801	7.13098	0.195353	78.6804	5.57659	247.754	80.4171	2489.92	626.099	78.6804	5.57659	3.15996
071920BK-01_ 348	727.722	4042.44	3.45995	17.0354	4.39785	0.410529	7.80943	0.0528475	0.794037	0.101677	331.98	2.56932	349.256	23.0827	466.742	172.314	331.98	2.56932	71.1271
071920BK-01_ 349	631.561	544.052	1.69644	11.7286	7.90979	0.113842	34.0228	0.0138363	2.42709	0.0713371	88.583	2.13529	109.474	35.3228	592.687	NA	88.583	2.13529	14.946
071920BK-01_ 350	489.179	380.582	3.3171	9.43806	19.6284	0.141994	24.3064	0.0147569	2.96014	0.121785	94.4338	2.775	134.819	30.6965	923.009	502.794	94.4338	2.775	10.2311
071920BK-01_ 351	399.386	154.1	3.2882	8.33711	29.5497	0.0322044	296.365	0.0109033	4.25829	0.0143684	69.9065	2.96074	32.1843	94.1562	NA	NA	69.9065	2.96074
071920BK-01_ 352	528.969	555.15	2.08647	15.7256	6.58082	0.149729	70.1346	0.0288303	1.58009	0.0225293	183.224	2.85434	141.673	93.0006	NA	NA	183.224	2.85434
071920BK-01_ 354	1053.82	564.898	2.34546	15.0872	8.15909	0.0900676	37.1216	0.0159372	1.3883	0.0373987	101.928	1.40393	87.5664	31.1536	NA	NA	101.928	1.40393
071920BK-01_ 355	133.353	1494.15	1.16721	9.00312	2.77665	4.82233	7.7735	0.334037	0.815657	0.104928	1857.92	13.166	1788.8	65.4648	1709.9	142.447	1709.9	142.447	108.657
071920BK-01_ 356	628.717	294.322	6.94063	9.11785	14.8239	0.101222	76.7794	0.0118478	3.00716	0.0391663	75.9267	2.26985	97.9041	71.7793	673.796	NA	75.9267	2.26985	11.2685
071920BK-01_ 357	1248.14	574.503	1.51069	15.6172	7.44212	0.0698791	65.6721	0.0129748	1.35897	0.0206933	83.1031	1.1221	68.5847	43.5802	NA	NA	83.1031	1.1221
071920BK-01_ 358	1936.25	897.347	1.85254	16.7606	8.07405	0.093841	26.6859	0.0152226	1.26168	0.047279	97.3919	1.21954	91.0751	23.2502	NA	NA	97.3919	1.21954
071920BK-01_ 359	323.696	390.072	2.72066	10.177	10.7134	0.149917	27.4627	0.0171714	6.29001	0.229038	109.754	6.84513	141.839	36.3701	719.913	577.081	109.754	6.84513	15.2455
071920BK-01_ 360	648.287	1164.48	4.68137	16.063	8.49507	0.199146	24.1294	0.028073	1.84975	0.0766597	178.477	3.2561	184.403	40.7106	262.001	NA	178.477	3.2561	68.1206
071920BK-01_ 361	387.909	803.898	2.08229	12.0017	13.2014	0.274568	27.464	0.0293733	3.07489	0.111961	186.625	5.65624	246.339	60.1434	863.203	576.366	186.625	5.65624	21.62
071920BK-01_ 362	315.449	193.687	1.44858	7.71262	17.4432	0.0847111	62.4318	0.010961	5.37968	0.086169	70.2748	3.76003	82.5645	49.5458	455.367	NA	70.2748	3.76003	15.4326
071920BK-01_ 363	1216.95	944.735	2.0885	12.9684	5.27389	0.129742	15.7619	0.0146942	1.15312	0.0731584	94.0358	1.07647	123.866	18.3818	743.76	334.301	94.0358	1.07647	12.6433
071920BK-01_ 364	708.331	12739.3	3.87921	7.60716	0.764193	6.99367	1.31228	0.37513	0.766689	0.584241	2053.49	13.4827	2110.63	11.6583	2167.52	18.5666	2167.52	18.5666	94.7392
071920BK-01_ 365	1262.06	1298	2.0367	15.5093	7.46043	0.116296	14.6127	0.0152961	1.41987	0.0971668	97.8582	1.37896	111.708	15.4589	418.941	326.295	97.8582	1.37896	23.3585
071920BK-01_ 366	122.32	485.428	1.73126	10.2779	19.578	0.545085	44.5461	0.0563024	2.57068	0.0577082	353.099	8.83293	441.772	160.904	935.568	960.135	353.099	8.83293	37.7417
071920BK-01_ 367	736.885	1338.11	3.11204	13.9278	10.4318	0.271566	11.4433	0.030545	1.43937	0.125783	193.958	2.75019	243.945	24.8201	758.353	240.158	193.958	2.75019	25.5763
071920BK-01_ 368	841.66	644.584	3.68564	13.6149	11.7663	0.0859818	19.7326	0.0115577	1.69279	0.0857862	74.0785	1.24681	83.7534	15.8648	370.141	NA	74.0785	1.24681	20.0136
071920BK-01_ 369	494.541	520.424	5.35837	10.6736	16.8472	0.13904	23.0905	0.0144368	3.91953	0.169746	92.4001	3.59582	132.188	28.6272	924.864	473.354	92.4001	3.59582	9.99067
071920BK-01_ 370	706.668	887.36	1.75246	12.8504	4.96898	0.25312	16.1172	0.0283576	1.45571	0.09032	180.261	2.58772	229.107	33.0679	766.713	340.163	180.261	2.58772	23.5109
071920BK-01_ 371	274.964	588.363	3.46353	9.25743	19.4922	0.389077	24.0937	0.0322382	2.29625	0.0953051	204.541	4.62306	333.695	68.6283	1373.04	468.139	204.541	4.62306	14.897
071920BK-01_ 372	744.794	1460.43	2.93788	16.1311	5.69793	0.247371	7.63439	0.0331837	1.26654	0.1659	210.443	2.62231	224.438	15.3741	374.751	169.651	210.443	2.62231	56.1554
071920BK-01_ 373	1474.95	4953.5	1.4195	18.0045	3.12597	0.445477	3.62119	0.0590384	0.600165	0.165737	369.775	2.15681	374.107	11.3322	401.978	80.0086	369.775	2.15681	91.9889
071920BK-01_ 374	729.278	561.103	1.42709	12.5723	10.9323	0.095022	27.4986	0.0123879	2.60506	0.0947343	79.3671	2.05489	92.1708	24.234	438.657	NA	79.3671	2.05489	18.0932
071920BK-01_ 375	1046.75	945.361	3.51219	13.6457	7.82038	0.112266	14.0191	0.0135116	1.74648	0.124578	86.5181	1.50093	108.037	14.3688	613.908	301.782	86.5181	1.50093	14.093
071920BK-01_ 376	203.393	684.571	4.48378	12.2033	11.5641	0.555576	26.1419	0.0636469	1.69171	0.0647127	397.766	6.52567	448.643	95.0793	719.528	562.717	397.766	6.52567	55.2816
071920BK-01_ 377	727.384	1476.36	1.98327	15.639	6.23337	0.234993	12.5137	0.030289	1.18373	0.0945947	192.357	2.24336	214.312	24.1819	463.943	276.997	192.357	2.24336	41.4613
071920BK-01_ 378	213.73	302.634	1.35793	10.2187	18.1687	0.203789	91.1278	0.0288209	3.72632	0.0408911	183.164	6.72924	188.327	157.904	254.585	NA	183.164	6.72924	71.9463
071920BK-01_ 379	403.39	325.396	3.11432	9.20061	18.4387	0.142101	33.0338	0.0153946	4.46439	0.135146	98.4838	4.36328	134.913	41.7566	837.032	699.837	98.4838	4.36328	11.7658
1. Analyses with >10% uncertainty (1-sigma) in 206Pb/238U age are not included.
2. Analyses with >10% uncertainty (1-sigma) in 206Pb/207Pb age are not included, unless 206Pb/238U age is <500 Ma.
3. Best age is determined from 206Pb/238U age for analyses with 206Pb/238U age <1000 Ma and from 206Pb/207Pb age for analyses with 206Pb/238Uage > 1000 Ma.
4. Concordance is based on 206Pb/238U age / 206Pb/207Pb age. Value is not reported for 206Pb/238U ages <500 Ma because of large uncertainty in 206Pb/207Pb age.
5. Analyses with 206Pb/238U age > 500 Ma and with >20% discordance (<80% concordance) are not included.
6. Analyses with 206Pb/238U age > 500 Ma and with >5% reverse discordance (<105% concordance) are not included.
7. All uncertainties are reported at the 1-sigma level, and include only measurement errors.
8. Analyses conducted by LA-MC-ICPMS, as described by Gehrels et al. (2008).
9. U concentration and U/Th are calibrated relative to Sri Lanka zircon standard and are accurate to ~20%.
10. Common Pb correction is from measured 204Pb with common Pb composition interpreted from Stacey and Kramers (1975).
11. Common Pb composition assigned uncertainties of 1.5 for 206Pb/204Pb, 0.3 for 207Pb/204Pb, and 2.0 for 208Pb/204Pb.
12. U/Pb and 206Pb/207Pb fractionation is calibrated relative to fragments of a large Sri Lanka zircon of 563.5 ± 3.2 Ma (2-sigma).
13. U decay constants and composition as follows: 235U = 9.8485 x 10-10, 238U = 1.55125 x 10-10, 238U/235U = 137.88.
14. Weighted mean and concordia plots determined with Isoplot (Ludwig, 2008).

## Sheet: 070418BK-01
Internal Uncertainty Level	one sigma
External Uncertainty 206/238 (% two sigma)	0.8
External Uncertainty 206/207 (% two sigma)	0.6
							Isotope ratios						Apparent ages (Ma)
Analysis	U	206Pb	U/Th	206Pb*	±	207Pb*	±	206Pb*	±	error	206Pb*	±	207Pb*	±	206Pb*	±	Best age	±	Conc
	(ppm)	204Pb		207Pb*	(%)	235U*	(%)	238U	(%)	corr.	238U*	(Ma)	235U	(Ma)	207Pb*	(Ma)	(Ma)	(Ma)	(%)
-070418BK-01 Spot 24	161.414	8501.69	2.54617	21.4459	1.26402	0.0827239	1.54437	0.0128725	0.887313	0.574548	82.4519	0.726947	80.7027	1.1981	29.2171	30.3011	82.4519	0.726947	NA
-070418BK-01 Spot 93	879.488	29350.2	2.74302	21.0059	1.04293	0.0935062	1.4327	0.0142518	0.982306	0.685634	91.2243	0.889791	90.7643	1.24395	78.6649	24.7632	91.2243	0.889791	NA
-070418BK-01 Spot 70	450.435	58243.9	2.7823	20.8419	1.15344	0.0974999	1.60472	0.0147445	1.11567	0.695241	94.355	1.04502	94.466	1.44754	97.2459	27.2928	94.355	1.04502	NA
-070418BK-01 Spot 137	728.585	34892.4	2.15621	21.0579	0.754024	0.0968611	1.22192	0.0147997	0.961527	0.786899	94.7058	0.903965	93.8748	1.09565	72.7909	17.9269	94.7058	0.903965	NA
-070418BK-01 Spot 113	225.24	14979.9	4.26065	21.2184	1.44489	0.0961478	1.75539	0.0148026	0.996826	0.567867	94.7245	0.937335	93.2142	1.56341	54.7209	34.478	94.7245	0.937335	NA
-070418BK-01 Spot 238	1418.9	64607	2.70093	21.0171	0.827782	0.0978855	1.26884	0.0149272	0.961624	0.757879	95.516	0.911733	94.8227	1.14867	77.3937	19.6644	95.516	0.911733	NA
-070418BK-01 Spot 270	579.028	91276.8	3.09463	20.5716	0.845618	0.100581	1.53458	0.0150132	1.28057	0.834478	96.0619	1.22102	97.3126	1.42402	128.091	19.8828	96.0619	1.22102	NA
-070418BK-01 Spot 128	372.725	41398	6.38999	21.0843	1.13759	0.0983298	1.70244	0.0150429	1.26657	0.743974	96.2507	1.21003	95.2335	1.54759	69.8508	27.0578	96.2507	1.21003	NA
-070418BK-01 Spot 127	160.908	6673.06	3.26258	21.5888	1.76068	0.0960478	2.01442	0.0150454	0.978731	0.485862	96.2666	0.93519	93.1216	1.79242	13.2621	42.3256	96.2666	0.93519	NA
-070418BK-01 Spot 310	1066.53	59819.3	3.17477	20.8712	0.676502	0.0993855	1.17008	0.0150508	0.954694	0.815919	96.3006	0.912543	96.2089	1.07404	93.9423	16.0224	96.3006	0.912543	NA
-070418BK-01 Spot 307	345.567	8085.83	11.9407	21.4714	1.2855	0.0967276	1.56798	0.0150695	0.897803	0.572587	96.4197	0.859218	93.7512	1.40418	26.3658	30.8091	96.4197	0.859218	NA
-070418BK-01 Spot 279	315.134	13737.2	6.46014	20.5831	1.68771	0.100947	2.00348	0.0150762	1.07961	0.538869	96.4621	1.03366	97.65	1.86527	126.778	39.7037	96.4621	1.03366	NA
-070418BK-01 Spot 57	713.017	41857.2	4.61494	20.939	0.890265	0.0995898	1.55944	0.0151307	1.28034	0.821028	96.808	1.23022	96.3976	1.43411	86.2812	21.1196	96.808	1.23022	NA
-070418BK-01 Spot 244	165.843	12660.2	3.95071	21.1015	2.1589	0.0989562	2.41885	0.0151511	1.09087	0.450986	96.9378	1.04955	95.8124	2.21158	67.9104	51.3998	96.9378	1.04955	NA
-070418BK-01 Spot 164	597.587	31469.9	4.79146	20.8625	0.992509	0.101298	1.3457	0.015334	0.908758	0.675304	98.0991	0.884734	97.9737	1.25682	94.918	23.4977	98.0991	0.884734	NA
-070418BK-01 Spot 45	449.109	16386.5	4.87857	21.5695	1.01709	0.0994376	1.48792	0.0155625	1.08602	0.729891	99.5497	1.07283	96.2571	1.36644	15.4117	24.4451	99.5497	1.07283	NA
-070418BK-01 Spot 227	432.326	32086.7	4.88139	20.9063	1.03606	0.10272	1.38599	0.0155819	0.920631	0.66424	99.6726	0.91056	99.2841	1.31093	89.9597	24.537	99.6726	0.91056	NA
-070418BK-01 Spot 208	431.763	21460	2.9358	20.8344	0.909152	0.104831	1.36707	0.0158474	1.02095	0.746812	101.358	1.02672	101.226	1.31709	98.1094	21.5207	101.358	1.02672	NA
-070418BK-01 Spot 59	394.493	32922.1	1.35138	20.7879	1.16972	0.105506	1.70551	0.0159138	1.24118	0.727747	101.779	1.25334	101.846	1.65272	103.381	27.6543	101.779	1.25334	NA
-070418BK-01 Spot 191	222.328	19779.8	2.6822	20.4218	1.36385	0.110665	1.68409	0.016398	0.987972	0.58665	104.851	1.02752	106.574	1.70382	145.224	31.991	104.851	1.02752	NA
-070418BK-01 Spot 85	251.349	14506.9	1.79477	20.9719	1.27816	0.108149	1.6297	0.0164569	1.01105	0.62039	105.225	1.05523	104.271	1.61496	82.5113	30.3462	105.225	1.05523	NA
-070418BK-01 Spot 100	766.201	43647.4	1.805	20.8321	0.764176	0.110162	1.24042	0.0166515	0.97707	0.787695	106.459	1.03163	106.114	1.24981	98.3875	18.0874	106.459	1.03163	NA
-070418BK-01 Spot 295	141.944	6931.33	3.04994	21.5557	2.3988	0.107553	2.57028	0.0168218	0.923089	0.359139	107.538	0.984438	103.724	2.53436	16.9429	57.6193	107.538	0.984438	NA
-070418BK-01 Spot 217	1089.58	46551.5	2.13648	20.4479	0.782366	0.114929	1.16292	0.0170515	0.860395	0.739859	108.995	0.929901	110.464	1.21719	142.237	18.3848	108.995	0.929901	NA
-070418BK-01 Spot 92	851.477	50117.6	1.527	20.788	0.711754	0.113501	1.33543	0.0171198	1.12995	0.846129	109.427	1.22604	109.163	1.38216	103.375	16.81	109.427	1.22604	NA
-070418BK-01 Spot 152	190.291	11461.6	2.77933	21.1144	1.42816	0.112323	1.69372	0.0172082	0.910523	0.537588	109.988	0.992967	108.088	1.73664	66.4466	34.02	109.988	0.992967	NA
-070418BK-01 Spot 206	249.824	19788.5	2.02057	20.8973	1.64516	0.113726	1.91581	0.017244	0.981722	0.512433	110.214	1.0728	109.368	1.98639	90.9891	38.9888	110.214	1.0728	NA
-070418BK-01 Spot 78	519.384	153290	3.46971	20.3828	1.04546	0.121056	1.48922	0.0179035	1.06057	0.712163	114.392	1.20251	116.029	1.63286	149.741	24.5043	114.392	1.20251	NA
-070418BK-01 Spot 183	200.617	130655	2.52661	20.5205	1.76634	0.12026	2.04679	0.0179059	1.03412	0.505238	114.408	1.17268	115.308	2.23104	133.934	41.5013	114.408	1.17268	NA
-070418BK-01 Spot 145	111.821	6205.77	3.73903	21.4775	1.48979	0.116127	1.75971	0.0180969	0.936537	0.532211	115.617	1.07314	111.555	1.85905	25.6991	35.7143	115.617	1.07314	NA
-070418BK-01 Spot 309	134.868	23379.6	3.02619	20.5044	1.06856	0.150086	1.45341	0.0223294	0.985181	0.677839	142.361	1.38714	141.988	1.92589	135.77	25.1018	142.361	1.38714	NA
-070418BK-01 Spot 76	126.451	7998.7	3.14009	21.022	2.04788	0.153635	2.31011	0.0234342	1.06901	0.462753	149.324	1.57794	145.116	3.12381	76.8445	48.6691	149.324	1.57794	NA
-070418BK-01 Spot 10	174.073	248809	2.61267	20.1633	1.35538	0.162556	1.65353	0.0237822	0.947157	0.572809	151.515	1.41835	152.938	2.34764	175.018	31.6259	151.515	1.41835	NA
-070418BK-01 Spot 69	346.09	3.36183e+06	2.05041	19.8444	1.05981	0.176347	1.54466	0.0253918	1.12373	0.727497	161.643	1.79385	164.912	2.35124	212.089	24.5596	161.643	1.79385	NA
-070418BK-01 Spot 308	885.862	62221	2.05011	20.4448	0.676164	0.173152	1.1944	0.025686	0.984574	0.824327	163.492	1.58946	162.151	1.79	142.619	15.8461	163.492	1.58946	NA
-070418BK-01 Spot 255	106.573	6194.8	1.7798	21.6895	1.385	0.173623	1.68717	0.0273239	0.963489	0.571067	173.778	1.65196	162.558	2.53436	2.07673	33.3493	173.778	1.65196	NA
-070418BK-01 Spot 39	519.798	136671	2.70525	19.8705	0.683774	0.197814	1.14273	0.0285202	0.915577	0.80122	181.28	1.63664	183.275	1.9162	209.05	15.8461	181.28	1.63664	NA
-070418BK-01 Spot 99	770.984	140503	10.0591	19.7222	0.71466	0.199838	1.22778	0.0285971	0.998357	0.813137	181.762	1.78929	184.989	2.07639	226.416	16.5337	181.762	1.78929	NA
-070418BK-01 Spot 146	221.445	17633.3	2.95696	20.4731	1.27853	0.192835	1.54615	0.0286455	0.869445	0.56233	182.066	1.56082	179.045	2.53797	139.363	30.0098	182.066	1.56082	NA
-070418BK-01 Spot 21	326.336	44625	2.77943	20.3382	0.992362	0.194709	1.41374	0.0287334	1.00692	0.712237	182.616	1.813	180.639	2.33951	154.876	23.2258	182.616	1.813	NA
-070418BK-01 Spot 108	342.266	23845.8	4.63421	20.1723	0.993318	0.196843	1.60608	0.0288113	1.26206	0.785805	183.105	2.27839	182.452	2.68214	173.981	23.1658	183.105	2.27839	NA
-070418BK-01 Spot 304	647.97	623087	1.46201	19.9254	0.794835	0.199791	1.42167	0.028885	1.17872	0.82911	183.566	2.13321	184.949	2.4038	202.677	18.4492	183.566	2.13321	NA
-070418BK-01 Spot 144	302.5	42437.9	3.5568	20.0201	0.954618	0.199026	1.70457	0.0289111	1.41218	0.828469	183.73	2.55797	184.302	2.87294	191.666	22.2261	183.73	2.55797	NA
-070418BK-01 Spot 155	245.466	44636.4	3.6945	19.9718	1.1417	0.19973	1.41003	0.0289432	0.827476	0.586848	183.931	1.50047	184.897	2.38352	197.243	26.5335	183.931	1.50047	NA
-070418BK-01 Spot 219	349.671	39227	4.31099	20.0392	0.942754	0.199656	1.40931	0.0290301	1.04755	0.74331	184.475	1.90509	184.835	2.38156	189.409	21.9357	184.475	1.90509	NA
-070418BK-01 Spot 56	236.915	11630.7	3.80887	20.3129	1.65674	0.198956	1.84297	0.0293235	0.807324	0.438055	186.313	1.48262	184.243	3.10531	157.79	38.7573	186.313	1.48262	NA
-070418BK-01 Spot 253	304.599	28810.3	2.21471	20.1795	0.963424	0.200833	1.4122	0.0294058	1.03253	0.73115	186.829	1.90137	185.831	2.39816	173.144	22.4965	186.829	1.90137	NA
-070418BK-01 Spot 9	203.472	15842.7	2.69895	19.9574	1.19376	0.203174	1.55489	0.0294211	0.996294	0.64075	186.924	1.83557	187.808	2.66606	198.928	27.742	186.924	1.83557	NA
-070418BK-01 Spot 20	325.066	52827.3	2.00697	20.2649	0.889275	0.200296	1.34975	0.0294513	1.01538	0.752277	187.113	1.87261	185.376	2.287	163.279	20.7915	187.113	1.87261	NA
-070418BK-01 Spot 2	391.294	145080	2.84892	20.1112	0.80101	0.201856	1.46461	0.0294556	1.22616	0.837191	187.14	2.26164	186.695	2.4977	181.051	18.6663	187.14	2.26164	NA
-070418BK-01 Spot 194	358.256	107081	2.47159	20.2723	0.817057	0.201235	1.302	0.0296002	1.01372	0.778585	188.045	1.87872	186.171	2.21472	162.434	19.0959	188.045	1.87872	NA
-070418BK-01 Spot 197	265.465	112059	3.39145	20.2553	0.913911	0.201699	1.12267	0.0296436	0.652041	0.580794	188.317	1.21014	186.563	1.91333	164.389	21.3472	188.317	1.21014	NA
-070418BK-01 Spot 171	300.687	2.51863e+06	3.29971	20.2483	0.841548	0.202357	1.41213	0.0297299	1.13398	0.803028	188.858	2.11055	187.118	2.41319	165.201	19.6456	188.858	2.11055	NA
-070418BK-01 Spot 184	277.933	58801.2	3.88584	20.1949	0.997854	0.203403	1.53099	0.0298048	1.16113	0.758417	189.327	2.16636	188.002	2.62755	171.369	23.3055	189.327	2.16636	NA
-070418BK-01 Spot 186	656.139	55272.6	3.9783	20.0563	0.871607	0.20543	1.30612	0.0298953	0.972751	0.744765	189.893	1.82024	189.71	2.26014	187.419	20.2882	189.893	1.82024	NA
-070418BK-01 Spot 122	271.977	23643.2	3.11368	20.2807	1.10344	0.203934	1.62247	0.0300095	1.18947	0.73312	190.608	2.23402	188.449	2.79058	161.511	25.7978	190.608	2.23402	NA
-070418BK-01 Spot 46	281.698	13421	3.66813	19.9942	0.78764	0.207859	1.09789	0.0301551	0.764844	0.696649	191.519	1.44328	191.754	1.91841	194.673	18.3094	191.519	1.44328	NA
-070418BK-01 Spot 290	95.0743	15766.8	3.54609	19.901	1.68756	0.209123	1.87427	0.030197	0.8155	0.435103	191.781	1.54094	192.816	3.2915	205.507	39.1725	191.781	1.54094	NA
-070418BK-01 Spot 242	289.604	58507.7	3.06369	19.5599	0.903307	0.213734	1.26368	0.0303339	0.883702	0.699307	192.638	1.67716	196.681	2.25953	245.454	20.813	192.638	1.67716	NA
-070418BK-01 Spot 254	328.403	45697.9	2.43818	20.0294	0.857788	0.20956	1.42069	0.0304555	1.1325	0.797149	193.398	2.15771	193.183	2.49926	190.583	19.9765	193.398	2.15771	NA
-070418BK-01 Spot 125	510.153	227607	3.75562	19.7761	0.764657	0.212287	1.33146	0.0304615	1.08999	0.818644	193.436	2.07711	195.47	2.36742	220.117	17.6913	193.436	2.07711	NA
-070418BK-01 Spot 204	301.878	19026.5	2.14186	20.347	0.948955	0.207035	1.42386	0.0305656	1.06154	0.745536	194.087	2.02961	191.062	2.47984	153.82	22.2129	194.087	2.02961	NA
-070418BK-01 Spot 129	177.656	7113.05	4.33367	20.5421	0.938674	0.20596	1.25563	0.0306985	0.833966	0.664181	194.919	1.60122	190.157	2.17742	131.437	22.074	194.919	1.60122	NA
-070418BK-01 Spot 67	166.444	167832	3.27088	19.6943	1.18984	0.215366	1.60487	0.0307756	1.07698	0.67107	195.401	2.07285	198.046	2.88763	229.649	27.4718	195.401	2.07285	NA
-070418BK-01 Spot 126	406.872	39720.5	2.48367	19.6918	0.780827	0.215912	1.63369	0.0308496	1.43501	0.878385	195.863	2.76839	198.502	2.94561	229.95	18.035	195.863	2.76839	NA
-070418BK-01 Spot 292	165.989	9207.76	3.96444	20.992	1.47519	0.202603	1.77206	0.0308594	0.981841	0.554067	195.925	1.89473	187.327	3.03134	80.2353	35.0255	195.925	1.89473	NA
-070418BK-01 Spot 30	151.409	8433.78	3.11101	20.5439	1.13162	0.207882	1.41614	0.0309875	0.851397	0.601211	196.725	1.64962	191.773	2.47473	131.235	26.6067	196.725	1.64962	NA
-070418BK-01 Spot 267	641.788	43345.3	3.70555	19.9836	0.745737	0.213807	1.11442	0.0310016	0.828132	0.743108	196.814	1.60525	196.742	1.9932	195.908	17.3534	196.814	1.60525	NA
-070418BK-01 Spot 102	190.567	39122.6	3.53969	20.3128	1.16971	0.210393	1.45385	0.0310091	0.863407	0.593875	196.861	1.67402	193.882	2.566	157.791	27.3653	196.861	1.67402	NA
-070418BK-01 Spot 41	379.476	50638.3	4.41539	19.986	1.00548	0.214076	1.39759	0.0310443	0.970701	0.694554	197.081	1.88412	196.968	2.50226	195.636	23.382	197.081	1.88412	NA
-070418BK-01 Spot 84	189.891	25834.9	3.20686	20.3148	1.16624	0.210616	1.43012	0.0310449	0.827731	0.578784	197.085	1.60665	194.069	2.52632	157.551	27.2814	197.085	1.60665	NA
-070418BK-01 Spot 294	131.686	18534.9	3.79702	20.1763	1.12815	0.21222	1.53557	0.0310682	1.04175	0.678411	197.231	2.02353	195.414	2.72964	173.512	26.3039	197.231	2.02353	NA
-070418BK-01 Spot 259	178.104	27461.8	2.20597	19.9895	1.17386	0.214215	1.46499	0.0310699	0.876497	0.598296	197.241	1.70263	197.084	2.62434	195.229	27.2974	197.241	1.70263	NA
-070418BK-01 Spot 75	419.909	22201.7	5.12963	20.4617	0.68426	0.209276	1.12926	0.0310706	0.898336	0.795511	197.245	1.74509	192.945	1.98435	140.688	16.0645	197.245	1.74509	NA
-070418BK-01 Spot 107	135.9	65885.5	2.96286	20.3825	1.06128	0.210439	1.37999	0.0311222	0.882083	0.639194	197.568	1.71628	193.921	2.43607	149.761	24.8748	197.568	1.71628	NA
-070418BK-01 Spot 202	435.219	83489	2.96378	20.1012	0.859254	0.213457	1.51474	0.0311329	1.24744	0.823537	197.635	2.42797	196.449	2.70554	182.208	20.021	197.635	2.42797	NA
-070418BK-01 Spot 252	189.977	9617.6	2.53403	20.767	0.913728	0.207019	1.46231	0.031194	1.14169	0.780743	198.017	2.22637	191.048	2.54664	105.761	21.6136	198.017	2.22637	NA
-070418BK-01 Spot 212	101.064	6893.24	3.55378	20.3371	1.65363	0.211938	1.82744	0.0312741	0.777855	0.425652	198.517	1.52064	195.177	3.24491	155.008	38.7281	198.517	1.52064	NA
-070418BK-01 Spot 226	522.921	510424	2.53529	19.7293	0.725067	0.21854	1.08083	0.0312847	0.801539	0.741598	198.584	1.56746	200.694	1.96824	225.591	16.7368	198.584	1.56746	NA
-070418BK-01 Spot 6	320.788	33996.5	2.21286	20.5587	0.889744	0.210075	1.46938	0.031337	1.16938	0.795829	198.911	2.2905	193.616	2.59017	129.539	20.9408	198.911	2.2905	NA
-070418BK-01 Spot 115	257.246	86012.1	2.7882	19.5764	0.834553	0.221108	1.07894	0.0314069	0.68384	0.633806	199.348	1.34236	202.832	1.98371	243.521	19.2057	199.348	1.34236	NA
-070418BK-01 Spot 66	111.903	41678.8	2.25145	20.0835	1.42269	0.215571	1.6976	0.0314137	0.926174	0.545577	199.39	1.81843	198.217	3.05688	184.263	33.1345	199.39	1.81843	NA
-070418BK-01 Spot 301	138.368	6694.4	3.60723	20.9216	1.26018	0.20729	1.55205	0.0314675	0.905979	0.58373	199.726	1.78173	191.276	2.70585	88.2469	29.8644	199.726	1.78173	NA
-070418BK-01 Spot 291	111.405	16968.4	2.77072	20.325	1.22375	0.2145	1.50312	0.0316334	0.872826	0.580675	200.763	1.72531	197.322	2.6956	156.36	28.6251	200.763	1.72531	NA
-070418BK-01 Spot 134	89.711	15429.8	2.24982	20.0487	1.4705	0.217832	1.75339	0.031688	0.954988	0.544654	201.104	1.89087	200.104	3.18451	188.307	34.2422	201.104	1.89087	NA
-070418BK-01 Spot 283	135.134	27285.5	4.44574	19.8007	1.26384	0.221344	1.67359	0.0318006	1.09709	0.65553	201.808	2.17972	203.027	3.07971	217.199	29.2809	201.808	2.17972	NA
-070418BK-01 Spot 203	74.5525	14863.9	3.08757	20.2656	1.56727	0.217139	1.85576	0.031929	0.993741	0.535489	202.61	1.98211	199.525	3.36164	163.196	36.6217	202.61	1.98211	NA
-070418BK-01 Spot 246	177.534	26531.9	3.24268	19.7025	1.23839	0.223766	1.65304	0.0319893	1.09495	0.662387	202.986	2.18798	205.04	3.0691	228.688	28.6053	202.986	2.18798	NA
-070418BK-01 Spot 112	249.413	39855.6	3.13112	19.9711	0.797598	0.220788	1.09023	0.0319938	0.743266	0.68175	203.014	1.48543	202.565	2.00209	197.34	18.5536	203.014	1.48543	NA
-070418BK-01 Spot 44	103.523	2724.18	3.42922	22.1777	1.63661	0.198946	2.17193	0.0320139	1.42786	0.657416	203.14	2.85533	184.234	3.65942	NA	NA	203.14	2.85533	NA
-070418BK-01 Spot 210	233.453	29990.8	4.05138	20.1823	1.03507	0.219503	1.5146	0.0321438	1.10573	0.730046	203.952	2.21985	201.496	2.76812	172.827	24.1612	203.952	2.21985	NA
-070418BK-01 Spot 277	110.784	33713.5	2.3761	20.1755	1.39821	0.219774	1.80798	0.0321728	1.14621	0.633974	204.133	2.30314	201.722	3.30768	173.608	32.6205	204.133	2.30314	NA
-070418BK-01 Spot 299	380.612	51269.4	3.07284	19.7993	0.804618	0.223971	1.19678	0.0321758	0.885929	0.740261	204.151	1.7803	205.209	2.22364	217.359	18.6361	204.151	1.7803	NA
-070418BK-01 Spot 260	104.292	589904	4.59828	20.179	1.49962	0.225823	1.77711	0.033064	0.953551	0.536574	209.696	1.96739	206.745	3.3242	173.21	35.0104	209.696	1.96739	NA
-070418BK-01 Spot 178	112.029	17146	4.08296	19.8302	1.46146	0.232003	1.81905	0.0333816	1.08308	0.595411	211.678	2.25542	211.851	3.47823	213.791	33.8592	211.678	2.25542	NA
-070418BK-01 Spot 53	138.413	12715.6	3.0166	20.3523	1.67078	0.227511	1.94491	0.0335973	0.995577	0.511889	213.023	2.08615	208.142	3.66022	153.24	39.1593	213.023	2.08615	NA
-070418BK-01 Spot 42	232.165	9967.65	4.71236	20.4351	0.940588	0.226866	1.26526	0.0336383	0.84627	0.668852	213.279	1.77538	207.608	2.37565	143.726	22.0502	213.279	1.77538	NA
-070418BK-01 Spot 50	216.811	88809.8	3.1534	19.9112	0.971448	0.244216	1.49699	0.0352824	1.13897	0.760844	223.524	2.50225	221.867	2.98351	204.344	22.5469	223.524	2.50225	NA
-070418BK-01 Spot 180	137.368	2824.91	8.93577	9.0115	4.47214	0.545106	4.65443	0.0356423	1.28985	0.277122	225.765	2.86162	441.785	16.6747	1814.54	81.2586	225.765	2.86162	NA
-070418BK-01 Spot 165	304.889	332390	2.22253	19.5771	0.984065	0.267658	1.48942	0.0380205	1.11803	0.750648	240.551	2.63988	240.82	3.19321	243.456	22.6913	240.551	2.63988	NA
-070418BK-01 Spot 52	38.2408	284488	4.18394	18.7568	1.82538	0.311241	2.02678	0.0423589	0.880824	0.434592	267.438	2.30746	275.143	4.88489	341.192	41.3061	267.438	2.30746	NA
-070418BK-01 Spot 209	59.1395	5587.7	3.50257	19.9024	1.84797	0.293775	2.09353	0.0424236	0.983798	0.469923	267.838	2.581	261.526	4.82689	205.36	42.8801	267.838	2.581	NA
-070418BK-01 Spot 34	262.865	29075.3	3.5062	17.3387	1.86015	0.391664	2.29101	0.049274	1.33737	0.583747	310.063	4.04854	335.584	6.547	516.444	40.8363	310.063	4.04854	NA
-070418BK-01 Spot 195	161.444	80241	3.01875	18.7409	0.925991	0.384051	1.30183	0.0522235	0.915047	0.702891	328.158	2.92765	330.014	3.66795	343.104	20.9355	328.158	2.92765	NA
-070418BK-01 Spot 163	68.7937	25355	1.5056	18.9435	0.83459	0.382252	1.23732	0.052541	0.913461	0.73826	330.103	2.93946	328.694	3.47436	318.705	18.9492	330.103	2.93946	NA
-070418BK-01 Spot 302	176.793	89068.1	2.66204	18.6452	0.823673	0.40141	1.15052	0.0543055	0.803274	0.698186	340.901	2.66722	342.671	3.34616	354.679	18.5995	340.901	2.66722	NA
-070418BK-01 Spot 139	234.553	23196.6	3.40209	19.0125	0.833988	0.394226	1.34099	0.0543841	1.05011	0.783082	341.381	3.4916	337.451	3.85008	310.457	18.9675	341.381	3.4916	NA
-070418BK-01 Spot 205	227.76	31489.9	3.24228	18.8497	0.909709	0.401962	1.15069	0.0549766	0.704636	0.612361	345.003	2.36711	343.07	3.34995	329.978	20.6264	345.003	2.36711	NA
-070418BK-01 Spot 47	629.256	207083	1.98243	18.4982	0.567943	0.412236	1.07645	0.0553302	0.914426	0.849487	347.163	3.09059	350.484	3.19052	372.523	12.7876	347.163	3.09059	NA
-070418BK-01 Spot 150	90.2487	38234.2	2.35465	18.7704	1.03527	0.410627	1.42462	0.0559254	0.978653	0.686955	350.798	3.34136	349.327	4.21083	339.579	23.4458	350.798	3.34136	NA
-070418BK-01 Spot 162	315.446	113160	6.18846	18.6171	0.757321	0.4157	1.43269	0.0561538	1.21616	0.84887	352.192	4.16833	352.972	4.27161	358.081	17.0789	352.192	4.16833	NA
-070418BK-01 Spot 169	780.914	92974	1.46487	18.3964	0.767589	0.422172	1.24949	0.056352	0.985915	0.789055	353.402	3.39046	357.603	3.76619	384.934	17.2442	353.402	3.39046	NA
-070418BK-01 Spot 241	250.324	73402.2	3.34407	18.8138	0.846329	0.414488	1.45991	0.0565816	1.18956	0.81482	354.803	4.10655	352.102	4.3438	334.306	19.197	354.803	4.10655	NA
-070418BK-01 Spot 278	403.432	48766.4	2.03482	18.5733	0.61585	0.420364	1.35861	0.0566504	1.21102	0.891361	355.223	4.18543	356.311	4.08276	363.386	13.8839	355.223	4.18543	NA
-070418BK-01 Spot 36	435.978	192110	2.23618	18.7737	0.778627	0.416058	1.28484	0.0566751	1.02203	0.795456	355.373	3.53374	353.229	3.83313	339.18	17.6129	355.373	3.53374	NA
-070418BK-01 Spot 263	327.295	95946.4	2.70577	18.5766	0.882924	0.421024	1.6486	0.0567495	1.39224	0.844498	355.827	4.81974	356.783	4.9597	362.986	19.894	355.827	4.81974	NA
-070418BK-01 Spot 94	134.989	19042.7	5.02529	18.6936	0.859629	0.420866	1.30583	0.0570854	0.98297	0.752755	357.876	3.42195	356.67	3.92744	348.852	19.4361	357.876	3.42195	NA
-070418BK-01 Spot 182	278.635	62474.2	2.17358	18.7225	0.696423	0.421332	1.15129	0.057237	0.916774	0.796298	358.8	3.19952	357.003	3.46535	345.333	15.7552	358.8	3.19952	NA
-070418BK-01 Spot 248	1558.28	275300	17.7968	18.4398	0.529223	0.427986	1.02194	0.057263	0.874231	0.855464	358.959	3.05236	361.746	3.11001	379.631	11.9007	358.959	3.05236	NA
-070418BK-01 Spot 105	83.2933	11605.1	1.81007	18.9095	1.10421	0.417677	1.53813	0.057307	1.07078	0.696155	359.227	3.74131	354.388	4.60138	322.832	25.0794	359.227	3.74131	NA
-070418BK-01 Spot 71	489.896	115168	1.63423	18.489	0.54231	0.428747	1.10824	0.057518	0.966486	0.872091	360.513	3.38867	362.287	3.37685	373.635	12.2075	360.513	3.38867	NA
-070418BK-01 Spot 25	268.66	230488	4.68572	18.6467	0.843267	0.425438	1.25785	0.0575606	0.933323	0.741998	360.773	3.27469	359.932	3.81197	354.51	19.0313	360.773	3.27469	NA
-070418BK-01 Spot 247	389.438	98571.1	4.13822	18.6997	0.714277	0.424676	1.33079	0.057621	1.12286	0.843753	361.141	3.94361	359.389	4.02794	348.119	16.146	361.141	3.94361	NA
-070418BK-01 Spot 177	150.739	17778.9	2.50431	18.5663	0.903299	0.429323	1.25918	0.0578359	0.877257	0.69669	362.451	3.09189	362.696	3.84037	364.239	20.3673	362.451	3.09189	NA
-070418BK-01 Spot 138	505.3	95247.6	2.63596	18.4165	0.864809	0.434039	1.32924	0.0579995	1.00944	0.759415	363.448	3.56729	366.041	4.08509	382.474	19.4368	363.448	3.56729	NA
-070418BK-01 Spot 153	420.674	145740	1.71015	18.3258	1.16523	0.438066	1.64803	0.0582491	1.16544	0.707173	364.968	4.13534	368.888	5.09754	393.567	26.1381	364.968	4.13534	NA
-070418BK-01 Spot 192	135.464	56903.9	3.33328	18.3125	0.816277	0.438412	1.16534	0.0582527	0.831688	0.713688	364.991	2.95125	369.132	3.60647	395.197	18.3048	364.991	2.95125	NA
-070418BK-01 Spot 240	1000.7	111763	2.6893	18.5678	0.517727	0.432873	1.05259	0.0583188	0.916467	0.870675	365.393	3.25557	365.214	3.22883	364.054	11.6524	365.393	3.25557	NA
-070418BK-01 Spot 168	298.655	24163.5	2.05882	18.7209	0.713831	0.42943	1.68502	0.058332	1.52635	0.905834	365.473	5.42322	362.772	5.14007	345.529	16.1485	365.473	5.42322	NA
-070418BK-01 Spot 262	527.185	156265	2.21756	18.4238	0.548618	0.436739	1.24492	0.0583832	1.11751	0.897661	365.786	3.9739	367.95	3.84253	381.591	12.3324	365.786	3.9739	NA
-070418BK-01 Spot 269	190.686	47927.6	3.70514	18.6015	0.960419	0.435451	1.39231	0.0587725	1.00803	0.723996	368.156	3.60713	367.04	4.28863	359.971	21.672	368.156	3.60713	NA
-070418BK-01 Spot 79	298.237	58416.4	12.8875	18.1071	0.727614	0.447789	1.61404	0.0588316	1.44073	0.892624	368.516	5.16043	375.73	5.06894	420.427	16.2447	368.516	5.16043	NA
-070418BK-01 Spot 288	273.657	109123	3.55574	18.57	0.827709	0.437068	1.17401	0.0588909	0.832578	0.709177	368.877	2.98497	368.183	3.62555	363.794	18.6552	368.877	2.98497	NA
-070418BK-01 Spot 38	224.64	71489.3	2.09741	18.6208	0.81665	0.436548	1.39005	0.0589817	1.12486	0.809226	369.43	4.03876	367.815	4.28918	357.63	18.413	369.43	4.03876	NA
-070418BK-01 Spot 265	153.175	96523.2	3.62154	18.4142	0.79417	0.441513	1.24048	0.0589907	0.95294	0.7682	369.485	3.42196	371.319	3.85787	382.76	17.8483	369.485	3.42196	NA
-070418BK-01 Spot 13	195.603	27910.7	3.55825	18.5614	0.930884	0.438326	1.29549	0.0590332	0.900978	0.69547	369.743	3.23757	369.071	4.00874	364.833	20.9876	369.743	3.23757	NA
-070418BK-01 Spot 11	902.174	332637	2.32488	18.467	0.730957	0.44232	1.44296	0.059268	1.24413	0.862201	371.172	4.48742	371.887	4.49328	376.32	16.4461	371.172	4.48742	NA
-070418BK-01 Spot 297	174.814	37274.2	2.4448	18.5304	1.11831	0.440901	1.62854	0.0592807	1.18386	0.726945	371.25	4.2709	370.888	5.05986	368.606	25.1872	371.25	4.2709	NA
-070418BK-01 Spot 4	334.799	211442	2.25683	18.0475	0.775954	0.453885	1.27522	0.059436	1.01197	0.793565	372.195	3.65984	379.996	4.04235	427.79	17.3022	372.195	3.65984	NA
-070418BK-01 Spot 156	360.106	245273	1.86642	18.3963	0.718722	0.44565	1.42096	0.0594857	1.2258	0.862651	372.497	4.43664	374.229	4.44781	384.938	16.1466	372.497	4.43664	NA
-070418BK-01 Spot 313	170.489	36699.7	2.62801	18.363	0.813651	0.447368	1.24728	0.0596069	0.945343	0.757925	373.234	3.42814	375.435	3.91454	389.012	18.2657	373.234	3.42814	NA
-070418BK-01 Spot 141	431.776	37362.2	2.18106	18.4739	0.816235	0.449229	1.39188	0.0602164	1.12743	0.810003	376.941	4.12788	376.739	4.38092	375.475	18.368	376.941	4.12788	NA
-070418BK-01 Spot 188	245.919	38745.3	4.78804	18.8076	0.855263	0.443565	1.34764	0.060531	1.04147	0.77281	378.854	3.83195	372.763	4.20462	335.079	19.3952	378.854	3.83195	NA
-070418BK-01 Spot 35	260.227	25688.8	2.07258	18.7747	0.895343	0.448559	1.40878	0.0611056	1.08767	0.772064	382.346	4.03773	376.27	4.42955	339.058	20.2788	382.346	4.03773	NA
-070418BK-01 Spot 222	160.394	4725.65	3.86571	12.5071	5.54602	0.678741	6.17622	0.0615956	2.71797	0.44007	385.322	10.1661	526.013	25.3608	1195.02	109.486	385.322	10.1661	NA
-070418BK-01 Spot 28	330.629	188684	3.66012	18.3962	0.702862	0.484462	1.2683	0.0646661	1.05574	0.8324	403.94	4.13368	401.13	4.20288	384.951	15.7906	403.94	4.13368	104.933
-070418BK-01 Spot 61	183.024	23793.8	4.26609	15.513	3.20889	0.588986	3.37417	0.0662963	1.04311	0.309147	413.803	4.18082	470.22	12.7	755.885	67.7487	413.803	4.18082	54.7442
-070418BK-01 Spot 224	216.442	91553.2	1.77677	17.7617	0.998267	0.522482	1.43873	0.0673353	1.03606	0.720119	420.082	4.21352	426.808	5.01341	463.31	22.1231	420.082	4.21352	90.6696
-070418BK-01 Spot 109	153.775	56207.9	1.60156	17.8154	0.815586	0.52958	1.18145	0.0684567	0.854774	0.723497	426.851	3.53044	431.531	4.15343	456.573	18.0998	426.851	3.53044	93.4902
-070418BK-01 Spot 106	275.285	63291.3	1.62445	18.1089	0.840102	0.52837	1.24164	0.0694255	0.914274	0.736344	432.694	3.82616	430.727	4.35851	420.201	18.7572	432.694	3.82616	102.973
-070418BK-01 Spot 175	367.359	115388	2.40547	17.6567	0.689156	0.549772	1.26931	0.0704336	1.06594	0.839774	438.767	4.52136	444.847	4.57211	476.413	15.2467	438.767	4.52136	92.098
-070418BK-01 Spot 245	297.313	113266	3.77354	17.6815	0.709732	0.591185	1.51043	0.0758458	1.3333	0.882726	471.279	6.05935	471.624	5.6982	473.283	15.7124	471.279	6.05935	99.5765
-070418BK-01 Spot 286	896.159	167514	2.45563	17.5708	0.70684	0.607971	1.21889	0.0775107	0.993005	0.814683	481.247	4.60479	482.28	4.67951	487.168	15.5996	481.247	4.60479	98.7846
-070418BK-01 Spot 91	213.003	107028	1.40483	17.9422	0.755885	0.620963	1.39763	0.0808406	1.17558	0.841129	501.138	5.66812	490.45	5.43647	440.816	16.8368	501.138	5.66812	113.684
-070418BK-01 Spot 48	273.971	42192.3	1.75777	17.5064	0.540657	0.642994	1.05409	0.0816755	0.904867	0.858439	506.116	4.40452	504.158	4.1887	495.299	11.9158	506.116	4.40452	102.184
-070418BK-01 Spot 296	331.508	197573	11.0044	13.1804	0.66288	0.885663	1.2455	0.0847001	1.05444	0.846605	524.117	5.30783	644.037	5.93994	1090.76	13.2962	524.117	5.30783	48.0506
-070418BK-01 Spot 1	94.7276	14716.3	1.2284	17.717	1.05128	0.664519	1.35653	0.0854249	0.857315	0.631991	528.423	4.34954	517.374	5.49898	468.86	23.2751	528.423	4.34954	112.704
-070418BK-01 Spot 22	309.994	85968.3	6.23813	17.3304	0.79057	0.694276	2.15074	0.0873028	2.00017	0.929992	539.566	10.3529	535.366	8.94905	517.494	17.3442	539.566	10.3529	104.265
-070418BK-01 Spot 60	644.828	134850	7.74558	16.9933	0.645364	0.719472	1.31539	0.0887112	1.14619	0.87137	547.91	6.02061	550.355	5.58865	560.474	14.0802	547.91	6.02061	97.7583
-070418BK-01 Spot 190	59.0049	64544.6	3.28091	17.1045	1.22786	0.720149	1.46262	0.0893759	0.794759	0.543379	551.845	4.20336	550.755	6.21763	546.229	26.8354	551.845	4.20336	101.028
-070418BK-01 Spot 215	85.3233	118855	3.57318	16.9694	0.916472	0.74831	1.28631	0.0921375	0.9026	0.701694	568.166	4.90877	567.243	5.59042	563.525	19.9651	568.166	4.90877	100.824
-070418BK-01 Spot 27	329.403	48514.5	2.79233	16.9882	0.617599	0.750598	1.38483	0.0925215	1.23949	0.895046	570.432	6.76665	568.572	6.02912	561.116	13.4461	570.432	6.76665	101.66
-070418BK-01 Spot 185	120.165	247290	2.60343	16.8839	0.880575	0.755847	1.50348	0.0925966	1.21862	0.810534	570.875	6.65765	571.611	6.57174	574.56	19.1272	570.875	6.65765	99.3586
-070418BK-01 Spot 62	210.991	66251.1	1.05146	16.5965	0.650297	0.785012	1.26545	0.0945326	1.08557	0.857858	582.288	6.04408	588.339	5.65085	611.733	14.0516	582.288	6.04408	95.1866
-070418BK-01 Spot 287	97.6482	46133.2	2.0943	16.3227	0.975873	0.861239	1.45216	0.102001	1.07538	0.740538	626.124	6.41656	630.799	6.82296	647.61	20.9768	626.124	6.41656	96.6823
-070418BK-01 Spot 49	118.835	65501.9	2.69859	16.2097	0.732281	0.924613	1.27753	0.108748	1.04683	0.819416	665.474	6.61888	664.796	6.23196	662.479	15.6698	665.474	6.61888	100.452
-070418BK-01 Spot 300	149.237	142467	2.98815	15.7096	0.80094	0.956468	1.26436	0.109025	0.978313	0.773763	667.08	6.19983	681.465	6.27629	729.291	16.9554	667.08	6.19983	91.4697
-070418BK-01 Spot 74	189.669	60000.6	2.78395	15.9408	0.729707	0.976661	1.11282	0.112965	0.84017	0.754995	689.942	5.49726	691.891	5.58302	698.233	15.5435	689.942	5.49726	98.8127
-070418BK-01 Spot 251	30.7902	13786.4	3.85904	14.2921	1.00332	1.50233	1.33431	0.155794	0.879618	0.659231	933.358	7.64331	931.333	8.13423	926.521	20.6262	926.521	20.6262	100.738
-070418BK-01 Spot 132	48.0424	39024.1	2.04713	13.8388	0.726081	1.69571	1.24525	0.17027	1.01166	0.812414	1013.6	9.48864	1006.92	7.95377	992.419	14.7627	992.419	14.7627	102.134
-070418BK-01 Spot 86	33.3324	692918	1.75235	13.7707	1.16945	1.57708	1.59301	0.157578	1.0817	0.679026	943.306	9.49227	961.221	9.89894	1002.41	23.7417	1002.41	23.7417	94.1034
-070418BK-01 Spot 157	134.347	92350.5	3.37771	13.6839	0.66629	1.71379	1.00749	0.170159	0.755709	0.75009	1012.99	7.08407	1013.7	6.46038	1015.23	13.5	1015.23	13.5	99.7791
-070418BK-01 Spot 311	138.307	124679	4.91023	13.5988	0.566736	1.7383	0.923299	0.171519	0.728897	0.789449	1020.47	6.87935	1022.83	5.95142	1027.86	11.461	1027.86	11.461	99.2816
-070418BK-01 Spot 114	180.613	75032.7	0.691772	13.5748	0.699762	1.75263	1.22126	0.172628	1.00091	0.819568	1026.57	9.49867	1028.13	7.89569	1031.44	14.1628	1031.44	14.1628	99.5283
-070418BK-01 Spot 172	46.4779	44891	2.42957	13.5323	0.811719	1.76968	1.18563	0.173762	0.864191	0.728889	1032.81	8.24713	1034.4	7.69222	1037.76	16.409	1037.76	16.409	99.5225
-070418BK-01 Spot 81	110.42	79398.4	6.19659	13.4374	0.775451	1.73308	1.15727	0.168975	0.859042	0.742299	1006.46	8.00479	1020.89	7.45142	1051.99	15.6437	1051.99	15.6437	95.672
-070418BK-01 Spot 256	48.7207	63091.3	2.01331	13.3964	0.783091	1.84505	1.29738	0.179343	1.0344	0.797293	1063.38	10.1403	1061.67	8.54333	1058.15	15.784	1058.15	15.784	100.494
-070418BK-01 Spot 293	95.6613	297601	1.14982	13.2928	0.885797	1.88035	1.18924	0.181361	0.793513	0.667242	1074.4	7.85296	1074.18	7.8832	1073.76	17.7907	1073.76	17.7907	100.06
-070418BK-01 Spot 174	121.31	2.55492e+06	3.22802	13.2313	0.706513	1.89094	0.965313	0.181538	0.657775	0.681411	1075.37	6.51502	1077.91	6.41124	1083.05	14.1516	1083.05	14.1516	99.2912
-070418BK-01 Spot 261	232.872	58787.5	2.91484	13.1782	0.611471	1.86217	1.08773	0.178058	0.899587	0.827033	1056.36	8.76508	1067.76	7.1859	1091.14	12.2372	1091.14	12.2372	96.8124
-070418BK-01 Spot 266	60.2249	139177	2.08467	13.0583	0.95192	1.95891	1.34775	0.185605	0.954086	0.70791	1097.52	9.62843	1101.51	9.06012	1109.38	19.0175	1109.38	19.0175	98.9312
-070418BK-01 Spot 123	91.4697	101505	6.04534	13.0088	0.73257	1.94781	1.11888	0.183853	0.845718	0.75586	1087.99	8.46677	1097.69	7.50705	1117	14.6064	1117	14.6064	97.4034
-070418BK-01 Spot 143	192.532	151021	2.9882	12.8876	0.593004	2.07509	1.14273	0.194043	0.976822	0.854813	1143.24	10.2332	1140.62	7.83001	1135.65	11.8035	1135.65	11.8035	100.668
-070418BK-01 Spot 273	107.081	63445.1	0.967797	12.7997	0.755358	2.07214	1.15379	0.192445	0.872166	0.755912	1134.6	9.07372	1139.64	7.90214	1149.22	14.9828	1149.22	14.9828	98.7284
-070418BK-01 Spot 0	70.7831	107040	3.5036	12.7989	0.939847	2.11757	1.20885	0.196652	0.760261	0.628914	1157.31	8.05401	1154.55	8.33744	1149.34	18.6844	1149.34	18.6844	100.693
-070418BK-01 Spot 88	222.016	118979	3.03704	12.7085	0.573696	2.1563	1.13585	0.198834	0.980321	0.863072	1169.05	10.4814	1167.08	7.87936	1163.41	11.388	1163.41	11.388	100.485
-070418BK-01 Spot 87	141.364	157795	85.4935	12.6614	0.739839	2.21445	1.11121	0.203439	0.829106	0.746132	1193.77	9.03521	1185.62	7.77306	1170.8	14.6659	1170.8	14.6659	101.961
-070418BK-01 Spot 173	225.403	1.34757e+06	2.20656	12.6397	0.599508	2.18993	1.31754	0.200842	1.17324	0.89048	1179.84	12.6495	1177.84	9.18445	1174.2	11.8815	1174.2	11.8815	100.481
-070418BK-01 Spot 213	146.806	142494	2.9171	12.6378	0.59828	2.127	1.0204	0.19504	0.826602	0.810079	1148.62	8.69675	1157.61	7.04767	1174.5	11.8575	1174.5	11.8575	97.797
-070418BK-01 Spot 211	101.227	44430.1	3.25696	12.2379	0.637547	2.42031	1.10532	0.214915	0.902918	0.816886	1254.95	10.2965	1248.65	7.94203	1237.8	12.5004	1237.8	12.5004	101.386
-070418BK-01 Spot 234	410.686	639804	2.95281	12.1333	0.454226	2.45646	1.18641	0.21626	1.09602	0.923808	1262.08	12.5628	1259.33	8.56159	1254.64	8.86997	1254.64	8.86997	100.593
-070418BK-01 Spot 281	440.419	1.91522e+06	33.0348	12.0021	0.652213	2.38827	1.23436	0.207984	1.04798	0.849007	1218.07	11.6316	1239.09	8.83463	1275.82	12.7178	1275.82	12.7178	95.4732
-070418BK-01 Spot 14	148.46	117178	2.89828	11.7617	0.692768	2.57421	1.21009	0.219687	0.992164	0.81991	1280.22	11.5201	1293.34	8.84957	1315.17	13.4342	1315.17	13.4342	97.3426
-070418BK-01 Spot 83	103.294	76807.4	2.26371	11.6921	0.610625	2.52358	1.09093	0.214092	0.904027	0.828676	1250.58	10.2766	1278.85	7.93357	1326.67	11.8211	1326.67	11.8211	94.2648
-070418BK-01 Spot 116	59.6506	78741.3	1.62612	11.4939	0.675477	2.85108	1.06515	0.237774	0.82358	0.773203	1375.11	10.1988	1369.1	8.00716	1359.7	13.0181	1359.7	13.0181	101.134
-070418BK-01 Spot 77	232.296	147862	4.22654	11.4221	0.649921	2.83635	0.972186	0.235068	0.723014	0.743699	1361	8.87089	1365.2	7.29841	1371.76	12.505	1371.76	12.505	99.2156
-070418BK-01 Spot 225	35.3697	115418	3.88822	11.3396	0.75155	2.90235	1.1514	0.2388	0.872293	0.757593	1380.46	10.8396	1382.52	8.69542	1385.7	14.4313	1385.7	14.4313	99.6218
-070418BK-01 Spot 232	152.647	90049.6	3.56705	11.3316	0.518321	2.85273	1.08541	0.234553	0.953654	0.878612	1358.32	11.6799	1369.53	8.16065	1387.05	9.95095	1387.05	9.95095	97.9283
-070418BK-01 Spot 179	104.775	64618.4	1.24441	11.1194	0.676051	3.03094	1.05815	0.244538	0.81402	0.769289	1410.24	10.3108	1415.44	8.07896	1423.26	12.9154	1423.26	12.9154	99.0857
-070418BK-01 Spot 19	281.632	109681	2.99733	11.1028	0.529754	3.10829	1.27529	0.250403	1.16005	0.909639	1440.55	14.9757	1434.74	9.79745	1426.12	10.1165	1426.12	10.1165	101.012
-070418BK-01 Spot 32	104.074	86792.7	2.87556	11.0751	0.578436	2.99671	1.26959	0.240814	1.13016	0.890179	1390.93	14.1395	1406.79	9.66601	1430.88	11.0391	1430.88	11.0391	97.2079
-070418BK-01 Spot 289	54.6923	32672.8	1.63454	10.9956	0.620802	2.96787	1.15226	0.236784	0.97072	0.842452	1369.96	11.9804	1399.43	8.75138	1444.61	11.8257	1444.61	11.8257	94.8325
-070418BK-01 Spot 118	109.882	394218	3.06893	10.797	0.530953	3.35131	1.03554	0.262547	0.889061	0.858549	1502.86	11.9182	1493.1	8.09842	1479.25	10.0671	1479.25	10.0671	101.596
-070418BK-01 Spot 282	135.549	105447	1.91468	10.6857	0.528988	3.41074	0.94363	0.264447	0.781415	0.828095	1512.56	10.5351	1506.87	7.40929	1498.88	10.0035	1498.88	10.0035	100.913
-070418BK-01 Spot 98	241.005	48859.1	6.29668	10.582	0.827677	1.25939	1.5963	0.0966979	1.36496	0.85508	595.028	7.75835	827.633	9.03493	1517.29	15.6123	1517.29	15.6123	39.2166
-070418BK-01 Spot 154	29.2223	14181.3	1.08892	10.4347	0.762257	3.5544	1.14577	0.269113	0.855431	0.746597	1536.3	11.6933	1539.42	9.07979	1543.68	14.3296	1543.68	14.3296	99.5218
-070418BK-01 Spot 104	16.395	87414.8	1.53525	10.1929	1.15458	3.49826	1.42344	0.258724	0.832541	0.58488	1483.31	11.0314	1526.82	11.2407	1587.63	21.579	1587.63	21.579	93.4291
-070418BK-01 Spot 130	87.7054	62459.1	2.09906	10.0231	0.479019	3.87373	0.864759	0.281722	0.719965	0.832561	1600.03	10.2013	1608.22	6.97911	1618.96	8.91525	1618.96	8.91525	98.8305
-070418BK-01 Spot 196	91.2273	82634.8	4.84151	10.0083	0.647235	4.00847	0.949226	0.291089	0.694347	0.731487	1646.97	10.0917	1635.91	7.71404	1621.72	12.0424	1621.72	12.0424	101.557
-070418BK-01 Spot 18	177.083	113394	3.06899	9.96614	0.615068	3.94085	1.21897	0.284974	1.05241	0.863364	1616.36	15.0458	1622.11	9.87241	1629.56	11.4322	1629.56	11.4322	99.19
-070418BK-01 Spot 31	148.457	120669	1.45228	9.88023	0.637705	4.03653	1.03623	0.289376	0.816759	0.788206	1638.41	11.8167	1641.59	8.43278	1645.64	11.8302	1645.64	11.8302	99.5607
-070418BK-01 Spot 237	186.652	187367	1.22045	9.8414	0.604161	4.08154	1.05689	0.291453	0.867189	0.820506	1648.79	12.616	1650.62	8.61987	1652.94	11.1957	1652.94	11.1957	99.7486
-070418BK-01 Spot 207	414.66	433268	3.96501	9.81504	0.664823	4.0636	1.32936	0.289395	1.15117	0.865962	1638.51	16.6558	1647.03	10.8328	1657.91	12.3122	1657.91	12.3122	98.8296
-070418BK-01 Spot 68	57.8219	103235	1.95127	9.81214	0.662803	4.04899	1.2209	0.288269	1.02532	0.83981	1632.88	14.7901	1644.1	9.94183	1658.46	12.2739	1658.46	12.2739	98.4574
-070418BK-01 Spot 12	200.929	785061	1.33877	9.77924	0.6314	4.12045	1.0639	0.292373	0.856278	0.80485	1653.38	12.4877	1658.37	8.69314	1664.67	11.6831	1664.67	11.6831	99.3215
-070418BK-01 Spot 223	181.93	286260	5.82176	9.48827	0.71052	4.64814	1.29221	0.320003	1.07934	0.835266	1789.74	16.8678	1757.96	10.7983	1720.37	13.0566	1720.37	13.0566	104.033
-070418BK-01 Spot 121	284	190993	3.90635	9.40253	0.834413	3.53643	1.49674	0.241267	1.24257	0.830186	1393.28	15.5695	1535.4	11.8481	1737.03	15.2996	1737.03	15.2996	80.2105
-070418BK-01 Spot 170	96.6222	85270.9	1.99598	9.27038	0.622431	4.61985	1.14617	0.310751	0.962443	0.8397	1744.4	14.7091	1752.86	9.56746	1762.94	11.3772	1762.94	11.3772	98.9483
-070418BK-01 Spot 63	83.022	53479.1	2.70943	9.25736	0.571465	4.6903	1.02559	0.315047	0.851629	0.830376	1765.5	13.1524	1765.51	8.58383	1765.51	10.4422	1765.51	10.4422	99.9992
-070418BK-01 Spot 276	303.014	198774	2.39779	9.22597	0.612464	4.71153	1.20953	0.3154	1.04301	0.86232	1767.23	16.1217	1769.29	10.1315	1771.72	11.181	1771.72	11.181	99.7466
-070418BK-01 Spot 221	227.17	147996	1.22122	9.21663	0.778576	4.28658	1.30784	0.286662	1.05084	0.803493	1624.83	15.0925	1690.79	10.7681	1773.57	14.2109	1773.57	14.2109	91.6137
-070418BK-01 Spot 275	159.556	165441	3.43327	9.19712	0.55145	4.77086	1.09554	0.318373	0.946632	0.864078	1781.78	14.7366	1779.79	9.19658	1777.43	10.0598	1777.43	10.0598	100.245
-070418BK-01 Spot 58	195.12	240175	3.88738	9.18842	0.612604	4.77453	1.23837	0.318317	1.07624	0.869073	1781.5	16.752	1780.43	10.3971	1779.16	11.1733	1779.16	11.1733	100.132
-070418BK-01 Spot 167	53.0818	141349	2.44636	9.16553	0.606857	4.84776	1.20918	0.322394	1.04586	0.864939	1801.41	16.4369	1793.23	10.1785	1783.7	11.0623	1783.7	11.0623	100.993
-070418BK-01 Spot 147	229.55	417164	1.44112	9.12741	0.531628	4.33133	1.22223	0.286851	1.10055	0.900447	1625.77	15.8146	1699.35	10.0828	1791.3	9.68345	1791.3	9.68345	90.7594
-070418BK-01 Spot 117	13.0198	40641.4	1.07175	9.11767	0.689882	4.97096	1.11753	0.328861	0.879163	0.786705	1832.86	14.0256	1814.4	9.44705	1793.24	12.563	1793.24	12.563	102.209
-070418BK-01 Spot 33	292.892	165756	1.19074	9.11314	0.594352	4.76086	1.081	0.314805	0.902938	0.835284	1764.31	13.9366	1778.02	9.07117	1794.15	10.8222	1794.15	10.8222	98.3367
-070418BK-01 Spot 119	272.106	472276	3.80043	9.11056	0.53909	4.93668	0.976416	0.326338	0.814107	0.833771	1820.61	12.9126	1808.55	8.24452	1794.66	9.81529	1794.66	9.81529	101.446
-070418BK-01 Spot 149	37.3972	118636	0.922771	9.03841	0.702848	5.07379	1.23522	0.332745	1.01576	0.822332	1851.67	16.3483	1831.73	10.4776	1809.13	12.7723	1809.13	12.7723	102.352
-070418BK-01 Spot 214	137.437	204137	2.64263	9.03106	0.649033	5.00388	1.09571	0.327894	0.882799	0.805688	1828.17	14.0524	1819.98	9.27283	1810.61	11.7921	1810.61	11.7921	100.97
-070418BK-01 Spot 280	111.953	123342	1.64553	8.95439	0.548058	5.01643	1.09686	0.325926	0.950129	0.866222	1818.6	15.0557	1822.1	9.28648	1826.08	9.93843	1826.08	9.93843	99.5906
-070418BK-01 Spot 29	312.97	217864	2.68561	8.91286	0.385071	4.94819	1.02056	0.320001	0.945122	0.926085	1789.73	14.7701	1810.52	8.62063	1834.51	6.97693	1834.51	6.97693	97.5594
-070418BK-01 Spot 298	95.7392	74741.6	6.76935	8.91082	0.540624	5.14182	1.08504	0.332447	0.940761	0.867031	1850.23	15.1311	1843.04	9.22372	1834.92	9.79487	1834.92	9.79487	100.834
-070418BK-01 Spot 230	94.6463	85636.6	2.02714	8.89126	0.533689	5.15553	1.07659	0.332602	0.934996	0.868481	1850.98	15.0436	1845.31	9.15586	1838.9	9.66452	1838.9	9.66452	100.657
-070418BK-01 Spot 181	120.465	87752	4.0699	8.8775	0.703189	5.13609	1.29224	0.330835	1.08416	0.838979	1842.43	17.374	1842.1	10.9832	1841.71	12.7278	1841.71	12.7278	100.039
-070418BK-01 Spot 96	58.2701	657780	1.16504	8.8611	0.811596	5.07844	1.27794	0.326517	0.987142	0.772446	1821.48	15.6636	1832.51	10.8417	1845.05	14.6844	1845.05	14.6844	98.7221
-070418BK-01 Spot 103	74.2715	119791	1.81551	8.84404	0.487274	5.27277	1.07298	0.338358	0.955959	0.890935	1878.77	15.5798	1864.46	9.15829	1848.54	8.81177	1848.54	8.81177	101.635
-070418BK-01 Spot 312	34.3938	47383.8	0.787705	8.81798	0.748955	4.96228	1.40411	0.317496	1.18768	0.845862	1777.49	18.4505	1812.92	11.8664	1853.88	13.5364	1853.88	13.5364	95.8796
-070418BK-01 Spot 95	106.582	2.00967e+06	2.99971	8.80616	0.661135	5.14348	1.03681	0.328648	0.798676	0.770318	1831.83	12.7353	1843.32	8.81423	1856.3	11.9454	1856.3	11.9454	98.6818
-070418BK-01 Spot 151	150.514	122056	2.69128	8.79549	0.608876	5.24533	0.93672	0.33475	0.711839	0.759927	1861.36	11.5086	1860.01	7.98852	1858.49	10.9981	1858.49	10.9981	100.155
-070418BK-01 Spot 303	127.931	132256	3.04476	8.79413	0.621645	5.25934	1.17756	0.335592	1.0001	0.8493	1865.43	16.1994	1862.29	10.0468	1858.77	11.2284	1858.77	11.2284	100.358
-070418BK-01 Spot 26	179.04	99441.2	4.7223	8.78733	0.588689	5.15238	1.06424	0.328513	0.886595	0.833079	1831.17	14.1329	1844.79	9.04994	1860.16	10.6313	1860.16	10.6313	98.4413
-070418BK-01 Spot 16	86.8731	63000.7	1.13268	8.7762	0.618046	5.24439	1.12571	0.333956	0.940877	0.835805	1857.53	15.1845	1859.86	9.6001	1862.45	11.1585	1862.45	11.1585	99.7357
-070418BK-01 Spot 54	107.115	163069	1.92313	8.76371	0.548092	5.32146	1.06022	0.338381	0.907555	0.856009	1878.88	14.7917	1872.32	9.06254	1865.02	9.89409	1865.02	9.89409	100.743
-070418BK-01 Spot 65	149.508	94691	3.53558	8.72854	0.533639	5.14093	0.919289	0.32559	0.748546	0.814266	1816.97	11.8522	1842.9	7.81444	1872.28	9.62473	1872.28	9.62473	97.0458
-070418BK-01 Spot 200	106.963	285696	1.70246	8.7138	0.477826	5.11499	0.90966	0.3234	0.774056	0.850929	1806.31	12.1938	1838.6	7.72621	1875.33	8.6149	1875.33	8.6149	96.3198
-070418BK-01 Spot 8	53.0969	788410	1.60339	8.69888	0.649176	5.35109	1.18543	0.337749	0.99188	0.836723	1875.83	16.1435	1877.06	10.1418	1878.42	11.6999	1878.42	11.6999	99.8622
-070418BK-01 Spot 97	130.005	118798	1.89397	8.66665	0.51307	5.48509	1.08063	0.344924	0.951059	0.880099	1910.31	15.7236	1898.27	9.2808	1885.1	9.23753	1885.1	9.23753	101.337
-070418BK-01 Spot 264	266.85	538129	5.55983	8.65373	0.617881	5.34355	1.22437	0.335522	1.05703	0.863323	1865.09	17.1189	1875.86	10.4726	1887.79	11.1215	1887.79	11.1215	98.7975
-070418BK-01 Spot 272	12.5714	10532.5	1.25311	8.65022	1.08399	5.43469	1.43146	0.341106	0.934895	0.653108	1891.99	15.3288	1890.34	12.2765	1888.52	19.5113	1888.52	19.5113	100.184
-070418BK-01 Spot 5	26.8324	70524.7	0.825259	8.64792	0.734142	5.45804	1.34536	0.342481	1.1274	0.837992	1898.59	18.5407	1894.02	11.5458	1889	13.2126	1889	13.2126	100.508
-070418BK-01 Spot 140	40.4622	109353	1.52692	8.63361	0.735876	5.51534	1.16768	0.345503	0.906622	0.77643	1913.09	15.0076	1902.99	10.037	1891.98	13.2391	1891.98	13.2391	101.116
-070418BK-01 Spot 198	271.346	203127	1.90674	8.55448	0.473656	4.90559	1.12925	0.30449	1.02512	0.907783	1713.53	15.425	1803.22	9.52495	1908.53	8.50588	1908.53	8.50588	89.7831
-070418BK-01 Spot 231	120.493	1.89152e+06	2.39043	8.48381	0.652081	5.66387	1.08394	0.348652	0.865862	0.79881	1928.16	14.4298	1925.88	9.35479	1923.41	11.6874	1923.41	11.6874	100.247
-070418BK-01 Spot 228	146.431	111267	3.44109	8.23214	0.566564	6.21187	1.32421	0.371042	1.19689	0.903849	2034.3	20.8807	2006.12	11.5819	1977.21	10.0924	1977.21	10.0924	102.887
-070418BK-01 Spot 64	1278.12	35593.9	2.47095	8.20392	0.713345	1.8275	2.80781	0.108785	2.71568	0.967189	665.686	17.1759	1055.38	18.429	1983.33	12.698	1983.33	12.698	33.5641
-070418BK-01 Spot 51	28.8016	21885.1	2.16904	8.18356	0.652808	6.03122	1.36314	0.358125	1.19666	0.87787	1973.28	20.3417	1980.36	11.8731	1987.75	11.6143	1987.75	11.6143	99.2721
-070418BK-01 Spot 111	635.305	1.20392e+06	2.239	8.1535	0.669864	4.85397	1.13338	0.287163	0.914241	0.806649	1627.34	13.1484	1794.3	9.54257	1994.29	11.9066	1994.29	11.9066	81.5997
-070418BK-01 Spot 101	212.944	107906	2.96389	8.14933	0.475388	5.99517	0.886131	0.354496	0.74782	0.843915	1956.03	12.6168	1975.14	7.71151	1995.2	8.44834	1995.2	8.44834	98.0368
-070418BK-01 Spot 120	178.403	301731	2.63609	8.12998	0.540542	5.85105	1.70547	0.345153	1.61754	0.948444	1911.41	26.7557	1954.01	14.7905	1999.43	9.60186	1999.43	9.60186	95.5978
-070418BK-01 Spot 284	125.239	936037	1.51356	8.11091	0.530541	6.12679	1.08712	0.36057	0.948868	0.872829	1984.88	16.2104	1994.07	9.48982	2003.6	9.41964	2003.6	9.41964	99.0657
-070418BK-01 Spot 159	186.493	60317	4.73556	8.10931	0.568557	6.21197	1.12387	0.365511	0.969448	0.862597	2008.25	16.7282	2006.13	9.82959	2003.95	10.0943	2003.95	10.0943	100.215
-070418BK-01 Spot 189	90.1373	315182	2.57556	8.09356	0.50471	6.23503	1.02056	0.366156	0.887028	0.869155	2011.29	15.3257	2009.38	8.93057	2007.4	8.95699	2007.4	8.95699	100.194
-070418BK-01 Spot 158	74.3677	229752	1.07352	8.07422	0.568926	6.19508	0.943882	0.36294	0.753151	0.797929	1996.1	12.9288	2003.75	8.25217	2011.64	10.094	2011.64	10.094	99.2272
-070418BK-01 Spot 285	209.017	3.7954e+06	1.6474	7.99026	0.622352	5.31083	1.53532	0.307901	1.40352	0.914158	1730.37	21.2998	1870.61	13.1198	2030.17	11.0162	2030.17	11.0162	85.2329
-070418BK-01 Spot 257	341.424	20566.6	4.0816	7.90257	0.896863	5.53407	1.70653	0.317322	1.45186	0.850764	1776.64	22.5451	1905.9	14.6769	2049.68	15.841	2049.68	15.841	86.6788
-070418BK-01 Spot 17	129.071	253756	5.32199	7.89356	0.510822	6.59836	0.994262	0.377917	0.853005	0.857928	2066.55	15.0815	2059.13	8.76713	2051.69	9.02151	2051.69	9.02151	100.724
-070418BK-01 Spot 133	42.2849	352934	2.73486	7.83941	0.607854	6.77296	1.38951	0.385256	1.2495	0.899239	2100.79	22.4015	2082.2	12.2944	2063.84	10.7181	2063.84	10.7181	101.79
-070418BK-01 Spot 271	165.903	195763	4.69167	7.83075	0.539032	6.69563	1.07989	0.380437	0.935741	0.866514	2078.32	16.6242	2072.04	9.54048	2065.79	9.50218	2065.79	9.50218	100.607
-070418BK-01 Spot 305	73.1121	148698	2.03163	7.82632	0.518726	6.62982	0.9821	0.376484	0.833933	0.849132	2059.84	14.7037	2063.32	8.6653	2066.79	9.1431	2066.79	9.1431	99.6637
-070418BK-01 Spot 239	144.299	385196	2.77187	7.7935	0.527312	6.69602	1.1932	0.378649	1.07036	0.897049	2069.97	18.951	2072.1	10.5417	2074.19	9.28673	2074.19	9.28673	99.7965
-070418BK-01 Spot 110	172.049	898723	2.5842	7.78351	0.556122	6.60618	0.961758	0.37309	0.78467	0.81587	2043.92	13.7442	2060.17	8.48183	2076.45	9.79175	2076.45	9.79175	98.4336
-070418BK-01 Spot 148	54.6263	263739	1.29972	7.66021	0.466406	6.6846	1.0795	0.371539	0.973545	0.901847	2036.64	17.0009	2070.59	9.53499	2104.53	8.18563	2104.53	8.18563	96.7741
-070418BK-01 Spot 89	210.179	459949	3.2258	7.50516	0.543846	7.11511	1.216	0.387462	1.08761	0.894414	2111.05	19.5795	2125.94	10.826	2140.35	9.50692	2140.35	9.50692	98.631
-070418BK-01 Spot 187	49.8426	39135.4	2.79846	7.37916	0.600691	7.47034	0.980366	0.399977	0.774782	0.790299	2168.93	14.2696	2169.44	8.77947	2169.9	10.4689	2169.9	10.4689	99.9554
-070418BK-01 Spot 40	275.174	1.87512e+07	3.5272	6.78628	0.485143	8.70408	1.30353	0.42859	1.20988	0.928161	2299.36	23.399	2307.5	11.8724	2314.71	8.32424	2314.71	8.32424	99.3368
-070418BK-01 Spot 23	141.367	182543	3.33846	6.78288	0.525711	8.63302	1.06437	0.424879	0.92548	0.869509	2282.59	17.7899	2300.04	9.68582	2315.57	9.01949	2315.57	9.01949	98.5759
-070418BK-01 Spot 216	241.871	221359	2.77345	6.60752	0.494794	9.20863	1.13392	0.441491	1.02027	0.899773	2357.31	20.1439	2358.97	10.3861	2360.4	8.44926	2360.4	8.44926	99.8693
-070418BK-01 Spot 258	89.5733	180998	2.31604	6.44954	0.580017	9.60073	0.917694	0.449284	0.711156	0.774938	2392.07	14.2119	2397.24	8.4393	2401.63	9.86247	2401.63	9.86247	99.602
-070418BK-01 Spot 176	199.8	226953	2.35335	6.02659	0.607406	11.0629	1.04805	0.483757	0.854094	0.814932	2543.61	17.951	2528.44	9.75988	2516.27	10.2066	2516.27	10.2066	101.087
-070418BK-01 Spot 131	69.8327	411582	2.0887	5.90863	0.576781	11.138	1.08584	0.47751	0.919988	0.847257	2516.41	19.167	2534.74	10.1175	2549.44	9.65996	2549.44	9.65996	98.7043
-070418BK-01 Spot 218	232.718	109978	2.67749	5.83261	0.52116	8.91752	1.26274	0.377394	1.15017	0.910857	2064.1	20.3151	2329.6	11.5293	2571.11	8.71273	2571.11	8.71273	80.2806
-070418BK-01 Spot 82	98.5486	290880	2.49525	5.82912	0.550218	11.3409	0.97438	0.479667	0.804162	0.825306	2525.81	16.805	2551.58	9.09224	2572.1	9.19761	2572.1	9.19761	98.2003
-070418BK-01 Spot 166	209.715	1.15599e+06	2.0993	5.79616	0.587541	11.5459	1.23023	0.485574	1.08086	0.878584	2551.5	22.7745	2568.3	11.4963	2581.58	9.81236	2581.58	9.81236	98.8348
-070418BK-01 Spot 7	195.19	567245	6.15891	5.74171	0.569916	11.4588	1.27996	0.477384	1.14608	0.895401	2515.86	23.8731	2561.23	11.9539	2597.33	9.50051	2597.33	9.50051	96.8635
-070418BK-01 Spot 90	166.86	956358	2.7826	5.71748	0.771885	9.25776	1.19601	0.384059	0.913578	0.763857	2095.22	16.3421	2363.85	10.9606	2604.37	12.8599	2604.37	12.8599	80.4499
-070418BK-01 Spot 201	160.911	403760	3.68981	5.59751	0.536083	11.7602	1.14176	0.477635	1.00808	0.882919	2516.96	21.006	2585.5	10.685	2639.65	8.89994	2639.65	8.89994	95.3518
-070418BK-01 Spot 124	55.0728	103549	3.16372	5.53671	0.619422	12.2693	1.31562	0.492902	1.16068	0.882228	2583.22	24.7036	2625.23	12.3524	2657.77	10.2697	2657.77	10.2697	97.1951
-070418BK-01 Spot 3	102.523	213640	2.35897	5.5337	0.567315	12.7883	0.998639	0.513471	0.821848	0.822968	2671.43	17.9743	2664.18	9.40487	2658.67	9.40493	2658.67	9.40493	100.48
-070418BK-01 Spot 193	120.822	90591.4	1.58569	5.50171	0.622907	12.5653	1.01357	0.501601	0.799574	0.788866	2620.67	17.218	2647.63	9.53326	2668.28	10.317	2668.28	10.317	98.2159
-070418BK-01 Spot 161	78.6105	157950	1.58502	5.44897	0.563697	12.8761	1.16282	0.509081	1.01705	0.874642	2652.71	22.1175	2670.63	10.9566	2684.22	9.319	2684.22	9.319	98.826
-070418BK-01 Spot 233	89.9243	8.01997e+06	1.22434	5.44465	0.582117	13.3071	1.02151	0.525704	0.839416	0.821742	2723.32	18.6452	2701.69	9.64754	2685.53	9.62248	2685.53	9.62248	101.407
-070418BK-01 Spot 142	83.6319	186959	0.633224	5.40933	0.549809	12.8532	1.1487	0.504479	1.00857	0.878014	2633.02	21.8014	2668.95	10.8222	2696.28	9.07927	2696.28	9.07927	97.6537
-070418BK-01 Spot 220	95.5841	3.3184e+06	9.62519	5.40207	0.587926	12.5899	0.973463	0.493479	0.77587	0.79702	2585.71	16.5264	2649.46	9.15729	2698.5	9.71025	2698.5	9.71025	95.8204
-070418BK-01 Spot 199	143.894	92459.5	1.75523	5.34931	0.77893	12.4511	2.59981	0.483274	2.48038	0.954062	2541.51	52.0977	2639.04	24.4403	2714.7	12.8452	2714.7	12.8452	93.6205
-070418BK-01 Spot 243	53.8678	188733	2.12692	5.32544	0.523656	12.2576	0.980583	0.473639	0.829052	0.845468	2499.5	17.1774	2624.33	9.20591	2722.07	8.62946	2722.07	8.62946	91.8236
-070418BK-01 Spot 15	147.604	233192	1.39538	5.27859	0.589176	13.4504	1.29652	0.515159	1.15492	0.890783	2678.61	25.3136	2711.81	12.2542	2736.61	9.6929	2736.61	9.6929	97.8806
-070418BK-01 Spot 235	59.5351	104271	1.47091	5.19757	0.656715	14.5674	1.05347	0.549374	0.823723	0.781916	2822.57	18.8284	2787.41	10.0099	2762.04	10.7825	2762.04	10.7825	102.191
-070418BK-01 Spot 55	99.6841	191052	2.38343	5.13954	0.716256	14.3945	1.17545	0.536794	0.932014	0.792903	2770.02	20.9862	2776.07	11.1604	2780.46	11.7368	2780.46	11.7368	99.6245
-070418BK-01 Spot 274	36.1766	60223.8	0.744344	5.04295	0.6289	14.78	0.98911	0.540814	0.763429	0.771834	2786.85	17.2737	2801.18	9.40707	2811.5	10.2794	2811.5	10.2794	99.1232
-070418BK-01 Spot 250	80.3539	102822	2.42044	4.68535	0.639892	16.5208	1.05289	0.561644	0.836137	0.794132	2873.42	19.3855	2907.44	10.0811	2931.07	10.3449	2931.07	10.3449	98.0331
-070418BK-01 Spot 37	57.6913	950831	1.68668	4.5483	0.555714	18.1283	1.1835	0.598264	1.04491	0.882904	3022.84	25.2142	2996.57	11.3893	2978.98	8.94609	2978.98	8.94609	101.472
1. Analyses with >10% uncertainty (1-sigma) in 206Pb/238U age are not included.
2. Analyses with >10% uncertainty (1-sigma) in 206Pb/207Pb age are not included, unless 206Pb/238U age is <400 Ma.
3. Best age is determined from 206Pb/238U age for analyses with 206Pb/238U age <900 Ma and from 206Pb/207Pb age for analyses with 206Pb/238Uage >900 Ma.
4. Concordance is based on 206Pb/238U age / 206Pb/207Pb age. Value is not reported for 206Pb/238U ages <400 Ma because of large uncertainty in 206Pb/207Pb age.
5. Analyses with 206Pb/238U age >400 Ma and with >20% discordance (<80% concordance) are not included.
6. Analyses with 206Pb/238U age >400 Ma and with >5% reverse discordance (<105% concordance) are not included.
7. All uncertainties are reported at the 2-sigma level, and include only measurement errors.
8. Analyses conducted by LA-ICPMS, as described by Gehrels et al. (2008) and Gehrels and Pecha (2014).
9. U concentration and U/Th are calibrated relative to FC-1 zircon standard and are accurate to ~20%.
10. Common Pb correction is from measured 204Pb with common Pb composition interpreted from Stacey and Kramers (1975).
11. Common Pb composition assigned uncertainties of 1.5 for 206Pb/204Pb, 0.3 for 207Pb/204Pb, and 2.0 for 208Pb/204Pb.
12. U/Pb and 206Pb/207Pb fractionation is calibrated relative to fragments of large Sri Lanka zircons and individual crystals of FC-1, and R33.
13. U decay constants and composition as follows: 238U = 9.8485 x 10-10, 235U = 1.55125 x 10-10, 238U/235U = 137.82.
14. Weighted mean and concordia plots determined with Isoplot (Ludwig, 2008).

## Sheet: 070819BK-02
Internal Uncertainty Level	one sigma
External Uncertainty 206/238 (% two sigma)	0.961675
External Uncertainty 206/207 (% two sigma)	0.873142
							Isotope ratios						Apparent ages (Ma)
Analysis	U	206Pb	U/Th	206Pb*	±	207Pb*	±	206Pb*	±	error	206Pb*	±	207Pb*	±	206Pb*	±	Best age	±	Conc
	(ppm)	204Pb		207Pb*	(%)	235U	(%)	238U	(%)	corr.	238U	(Ma)	235U	(Ma)	207Pb*	(Ma)	(Ma)	(Ma)	(%)
070819BK-02 1	839.223	2968.18	2.87212	17.3322	2.69865	0.203904	3.25618	0.028124	0.884375	0.271599	178.796	1.5595	188.424	5.59986	311.841	71.3286	178.796	1.5595	57.3358
070819BK-02 2	527.081	7278.06	2.41524	17.0432	5.34592	0.250561	5.62138	0.0321742	0.746091	0.132724	204.142	1.49922	227.032	11.4367	472.312	123.363	204.142	1.49922	43.2218
070819BK-02 3	215.223	5792.59	2.04328	15.3863	5.84596	0.50125	7.12496	0.0583204	0.875286	0.122848	365.403	3.10937	412.548	24.1599	686.574	151.102	365.403	3.10937	53.2212
070819BK-02 4	985.553	11413.5	2.97397	18.9201	2.5856	0.219631	3.47752	0.0309702	0.773244	0.222355	196.618	1.49738	201.603	6.35874	261.305	77.9044	196.618	1.49738	75.2444
070819BK-02 5	182.426	1773.79	1.62677	13.8846	13.1096	0.23054	15.2125	0.0262437	2.35931	0.15509	166.996	3.88936	210.644	28.9467	733.019	320.001	166.996	3.88936	22.7819
070819BK-02 6	772.498	8190.59	1.92245	18.9246	3.21452	0.203129	3.38985	0.0289349	0.836395	0.246735	183.879	1.51622	187.771	5.81133	238.01	75.7926	183.879	1.51622	77.2567
070819BK-02 7	128.129	393	3.14292	8.93951	20.3836	0.131108	40.9633	0.0126053	5.42536	0.132445	80.751	4.35371	125.093	48.2476	1081.01	850.103	80.751	4.35371	7.46996
070819BK-02 8	223.268	908.512	2.36547	9.3431	12.7903	0.185058	15.1161	0.0146742	2.90389	0.192105	93.9089	2.70724	172.404	23.9729	1457.1	283.648	93.9089	2.70724	6.44494
070819BK-02 9	645.823	3619.47	2.99631	16.7236	4.14535	0.120658	7.56397	0.0157325	1.18569	0.156755	100.629	1.18388	115.669	8.26938	438.317	166.474	100.629	1.18388	22.958
070819BK-02 10	709.937	4550.87	2.50442	18.2528	4.46231	0.141946	6.97785	0.0200158	0.941552	0.134934	127.756	1.19105	134.776	8.80725	261.306	158.949	127.756	1.19105	48.8913
070819BK-02 11	1178.93	11729.6	5.67684	19.8449	2.00608	0.201304	3.15706	0.0297709	0.845721	0.267883	189.114	1.57615	186.229	5.37175	150.835	71.2987	189.114	1.57615	125.378
070819BK-02 12	170.794	1409	1.5437	13.2441	10.3129	0.249231	11.0397	0.0277468	2.14387	0.194197	176.431	3.73117	225.952	22.3675	779.952	228.246	176.431	3.73117	22.6208
070819BK-02 13	879.343	4515.29	2.16256	17.1684	4.11454	0.121365	7.20809	0.0160409	0.959684	0.13314	102.586	0.976708	116.309	7.92148	408.028	160	102.586	0.976708	25.1419
070819BK-02 14	326.895	1447.75	2.46935	12.562	11.6768	0.135022	17.4373	0.0140855	2.03591	0.116756	90.1676	1.82295	128.6	21.0655	915.221	358.862	90.1676	1.82295	9.852
070819BK-02 15	1396.95	10978.6	1.60144	19.6286	1.94121	0.19403	2.25134	0.028438	0.717641	0.318762	180.765	1.27922	180.062	3.71472	171.84	49.8169	180.765	1.27922	105.194
070819BK-02 16	318.324	1936.62	1.05389	14.1824	8.79453	0.165053	12.676	0.019036	1.75579	0.138512	121.561	2.11435	155.116	18.2363	705.256	268.085	121.561	2.11435	17.2364
070819BK-02 17	180.055	659.784	1.84578	10.1167	19.0139	0.146362	23.3979	0.0137636	3.37	0.14403	88.1211	2.94948	138.695	30.3419	1125.29	467.593	88.1211	2.94948	7.83097
070819BK-02 18	421.986	1530.71	2.10767	13.5876	7.80792	0.117135	13.1984	0.0132594	1.32806	0.100623	84.9141	1.12032	112.472	14.0527	744.877	278.704	84.9141	1.12032	11.3997
070819BK-02 19	472.488	3304.27	3.05832	17.9525	4.78149	0.216322	7.6847	0.0306353	0.925692	0.120459	194.523	1.77379	198.844	13.8783	251.439	175.732	194.523	1.77379	77.3641
070819BK-02 20	184.267	908.947	1.58437	9.3739	22.7469	0.214746	23.3116	0.0170678	2.18586	0.0937669	109.098	2.36466	197.528	41.8685	1452.69	447.725	109.098	2.36466	7.51006
070819BK-02 21	287.603	2764.69	2.05616	14.6863	8.59431	0.295406	9.22828	0.0341151	1.33401	0.144557	216.252	2.83698	262.806	21.3712	702.471	194.736	216.252	2.83698	30.7845
070819BK-02 22	1233.92	10293.2	4.40111	19.5487	1.96763	0.210437	2.5054	0.0307222	0.820674	0.327562	195.067	1.57688	193.919	4.42272	180.967	55.1614	195.067	1.57688	107.792
070819BK-02 23	404.696	5468.06	2.95958	17.1063	4.30317	0.453069	4.97754	0.0588493	0.712738	0.143191	368.624	2.55362	379.426	15.7601	446.836	109.554	368.624	2.55362	82.4966
070819BK-02 24	340.986	2192.86	2.21628	14.2025	8.71748	0.129329	13.2148	0.0146654	1.54735	0.117092	93.8529	1.44171	123.495	15.3673	741.169	278.702	93.8529	1.44171	12.6628
070819BK-02 25	125.345	934.317	3.42999	11.9623	11.1736	0.329129	23.4387	0.0349086	2.01774	0.0860859	221.197	4.38747	288.901	58.9998	880.991	489.392	221.197	4.38747	25.1077
070819BK-02 26	314.527	33762.7	2.12506	8.10713	0.667676	6.17922	0.950021	0.363687	0.667484	0.702599	1999.62	11.4755	2001.51	8.30289	2004.22	12.0023	2004.22	12.0023	99.7707
070819BK-02 27	206.938	2403.37	2.92715	12.6913	5.96852	0.347818	9.87072	0.0345484	1.04762	0.106134	218.952	2.25527	303.078	25.8698	1015.28	199.31	218.952	2.25527	21.5657
070819BK-02 28	595.311	5810.05	2.12593	16.4005	4.67987	0.239621	6.28534	0.029671	0.970435	0.154397	188.489	1.80268	218.11	12.3372	552.206	135.667	188.489	1.80268	34.1338
070819BK-02 29	679.649	8815.8	1.77611	19.367	2.44484	0.20052	3.74905	0.0290592	1.06499	0.284069	184.657	1.93868	185.566	6.35837	198.14	83.5264	184.657	1.93868	93.1953
070819BK-02 30	1144.44	23919.6	1.09024	18.6667	1.57943	0.417654	1.87791	0.0571052	0.818665	0.435944	357.996	2.8509	354.372	5.61767	331.68	38.3122	357.996	2.8509	107.934
070819BK-02 31	574.2	4537.79	2.15464	16.9262	4.90148	0.231002	6.12507	0.0299422	0.914997	0.149385	190.186	1.71478	211.025	11.6712	451.483	134.592	190.186	1.71478	42.1249
070819BK-02 32	801.134	6655.58	2.46366	18.3856	4.70388	0.209553	4.89024	0.0290756	0.883452	0.180656	184.76	1.6091	193.177	8.60278	298.266	109.761	184.76	1.6091	61.9448
070819BK-02 33	120.036	989.477	4.10232	12.2853	7.09546	0.308705	13.4861	0.0334334	1.71649	0.127279	212.001	3.5798	273.177	32.3121	837.647	279.754	212.001	3.5798	25.3091
070819BK-02 34	914.555	17929.6	1.63824	18.6962	1.97678	0.402978	2.24595	0.0553448	0.790976	0.352179	347.253	2.67401	343.806	6.55037	321.585	47.7608	347.253	2.67401	107.981
070819BK-02 35	1201.16	2244.83	2.05723	18.867	2.11578	0.198134	5.04113	0.0308717	0.918112	0.182124	196.002	1.77244	183.546	8.4649	27.0991	NA	196.002	1.77244	723.278
070819BK-02 36	639.744	11030.1	1.81834	18.2756	1.95243	0.444615	2.283	0.0602374	0.78682	0.344643	377.069	2.88175	373.501	7.13468	352.391	48.4176	377.069	2.88175	107.003
070819BK-02 37	729.145	3439.62	3.01214	17.6648	5.63701	0.177094	7.07565	0.0244722	0.971114	0.137247	155.858	1.49541	165.557	10.8095	307.567	159.807	155.858	1.49541	50.6747
070819BK-02 39	380.013	5057.87	2.29482	16.3758	4.98322	0.271904	6.09266	0.0337703	1.13872	0.186901	214.102	2.39799	244.215	13.2258	545.578	130.888	214.102	2.39799	39.2431
070819BK-02 40	261.857	1042.88	2.5481	11.0827	8.67968	0.146283	18.5223	0.0138025	2.18766	0.11811	88.3683	1.92001	138.625	24.0053	1118.6	369.971	88.3683	1.92001	7.89989
070819BK-02 41	565.228	7871.33	2.15156	18.2794	2.85139	0.419154	3.50562	0.0573205	0.787566	0.224658	359.309	2.75238	355.446	10.5137	331.262	77.4712	359.309	2.75238	108.467
070819BK-02 42	1227.19	20980.6	2.79788	19.0137	1.8894	0.29829	2.36582	0.0415414	0.750647	0.317289	262.38	1.93001	265.064	5.51929	289.848	51.2787	262.38	1.93001	90.5233
070819BK-02 43	741.608	7106.62	4.54644	18.465	2.72306	0.215542	4.30095	0.0299029	0.813205	0.189076	189.941	1.52208	198.192	7.74397	298.544	96.3654	189.941	1.52208	63.6223
070819BK-02 44	611.713	2754.19	2.5976	14.8306	7.64277	0.136075	8.38642	0.0158385	1.26801	0.151198	101.302	1.27448	129.542	10.1998	685.739	177.238	101.302	1.27448	14.7726
070819BK-02 45	382.388	1054.86	2.05561	13.4653	9.79605	0.116767	13.0685	0.0139483	2.00072	0.153095	89.295	1.77423	112.137	13.8753	630.123	279.287	89.295	1.77423	14.171
070819BK-02 46	813.024	4855.17	5.9021	19.2339	1.77462	0.20246	4.69916	0.0298852	0.693052	0.147484	189.83	1.29644	187.205	8.03392	155.265	108.879	189.83	1.29644	122.262
070819BK-02 47	899.931	2776.82	6.78086	16.8641	7.91542	0.1124	8.53393	0.0150357	0.887129	0.103953	96.2049	0.847125	108.158	8.75577	381.055	191.11	96.2049	0.847125	25.247
070819BK-02 48	206.643	2025.89	3.11041	13.7419	7.48956	0.315595	12.7117	0.0347372	1.0416	0.0819401	220.129	2.25415	278.509	30.9725	803.848	266.268	220.129	2.25415	27.3844
070819BK-02 49	267.498	3456.28	1.88889	16.3443	5.63228	0.214376	6.74041	0.0272304	1.09442	0.162367	173.191	1.8702	197.218	12.0826	496.265	146.72	173.191	1.8702	34.8989
070819BK-02 50	294.143	2407.73	4.0259	15.0233	8.09336	0.258498	9.88631	0.0308658	0.89255	0.0902814	195.965	1.72277	233.455	20.6219	631.012	212.56	195.965	1.72277	31.0556
070819BK-02 51	310.029	1900.32	2.01645	15.1118	7.69569	0.1484	14.5642	0.0183326	1.8447	0.12666	117.109	2.14081	140.498	19.1121	557.313	316.552	117.109	2.14081	21.0132
070819BK-02 52	240.795	2588.25	2.51997	17.0138	5.47619	0.226855	12.0101	0.030844	1.35174	0.11255	195.829	2.60729	207.599	22.5529	344.366	270.872	195.829	2.60729	56.8663
070819BK-02 53	243.083	2501.59	2.47774	14.7712	8.21275	0.260933	9.60403	0.0304662	1.41763	0.147608	193.465	2.70187	235.418	20.1826	679.045	203.38	193.465	2.70187	28.4908
070819BK-02 54	609.28	8676.33	2.2895	18.7288	1.85234	0.421625	2.40595	0.0589453	0.824134	0.342539	369.208	2.95728	357.213	7.24546	281.019	51.7394	369.208	2.95728	131.382
070819BK-02 55	221.196	2509.54	3.00337	15.5047	7.07967	0.430959	7.30367	0.0530617	1.0071	0.13789	333.291	3.27129	363.857	22.3383	564.518	157.743	333.291	3.27129	59.04
070819BK-02 56	111.002	10146	0.919244	9.11729	1.75194	4.81488	1.94264	0.32125	0.769111	0.39591	1795.83	12.055	1787.5	16.3345	1778.57	32.5449	1778.57	32.5449	100.97
070819BK-02 57	156.653	2509.86	2.42925	14.1166	5.0605	0.489214	7.69243	0.054275	1.18303	0.153792	340.714	3.92609	404.375	25.6642	787.255	159.784	340.714	3.92609	43.2788
070819BK-02 58	458.993	3890.01	2.29627	16.0754	6.20425	0.218049	7.33918	0.0269106	1.54354	0.210315	171.184	2.60751	200.285	13.3411	559.387	156.592	171.184	2.60751	30.602
070819BK-02 59	265.628	1600.26	1.88435	16.7363	5.69882	0.182834	7.36692	0.0260885	1.36824	0.185727	166.021	2.24256	170.496	11.5629	234.074	167.243	166.021	2.24256	70.9267
070819BK-02 60	232.938	3797.75	1.72917	15.4093	3.18992	0.454484	5.29559	0.0536881	0.916883	0.173141	337.125	3.01161	380.414	16.8032	654.07	111.961	337.125	3.01161	51.5426
070819BK-02 61	146.889	2142.45	2.34432	10.9647	18.2246	0.368577	19.6758	0.0314221	1.386	0.070442	199.443	2.72195	318.598	53.8552	1318.02	384.115	199.443	2.72195	15.132
070819BK-02 62	407.582	5702.19	2.28256	16.4369	4.46148	0.231707	5.56738	0.0286549	1.17086	0.210308	182.124	2.10259	211.607	10.6348	554.909	118.826	182.124	2.10259	32.8206
070819BK-02 63	53.4862	5118.77	0.845267	9.19563	3.27697	4.80487	3.54154	0.325297	1.1048	0.311955	1815.55	17.4812	1785.75	29.7739	1751.89	61.6006	1751.89	61.6006	103.634
070819BK-02 64	1011.11	10452.7	5.03299	18.1252	4.13992	0.228593	4.31644	0.0305337	0.819156	0.189776	193.888	1.5646	209.037	8.15492	384.378	95.2541	193.888	1.5646	50.442
070819BK-02 65	315.072	2748.83	2.26557	15.5873	7.16164	0.229977	11.315	0.0280602	1.20187	0.106219	178.396	2.11469	210.18	21.4851	584.241	244.948	178.396	2.11469	30.5347
070819BK-02 66	765.148	8726.88	1.93356	18.8244	1.92275	0.381685	2.55336	0.0532907	1.21694	0.476602	334.693	3.96907	328.277	7.16217	284.047	51.3366	334.693	3.96907	117.83
070819BK-02 67	799.013	1396.77	2.85415	16.7791	4.22516	0.10256	7.87146	0.0150176	0.870454	0.110584	96.0901	0.830218	99.1365	7.43477	174.022	NA	96.0901	0.830218	55.2171
070819BK-02 68	1454.54	2118.64	3.95332	19.929	2.16401	0.0532871	10.5941	0.00886332	1.00923	0.0952628	56.8849	0.571572	52.7145	5.44221	NA	NA	56.8849	0.571572	NA
070819BK-02 69	237.183	1680.05	2.23866	12.9763	13.1996	0.153012	15.4771	0.0160202	3.16702	0.204626	102.454	3.2191	144.568	20.858	907.721	313.789	102.454	3.2191	11.287
070819BK-02 70	468.009	2270	3.26971	15.741	6.84191	0.143821	8.72231	0.0180651	1.30904	0.15008	115.416	1.4974	136.441	11.1363	520.854	189.546	115.416	1.4974	22.159
070819BK-02 71	59.5832	8409.84	3.11526	5.28291	0.807427	13.7697	1.1788	0.525744	0.708123	0.600715	2723.5	15.7297	2734	11.1594	2742.47	15.498	2742.47	15.498	99.3082
070819BK-02 72	226.729	27201.9	4.24215	8.86161	1.02252	4.75065	1.49989	0.30331	1.07929	0.719582	1707.7	16.1919	1776.22	12.5819	1858.5	18.8149	1858.5	18.8149	91.8862
070819BK-02 73	735.995	8448.72	2.50113	18.423	4.2242	0.216619	4.37714	0.0295707	0.799554	0.182666	187.861	1.48037	199.092	7.91353	335.297	97.5713	187.861	1.48037	56.0282
070819BK-02 74	597.301	9155.44	2.35322	17.893	2.9267	0.212178	4.13121	0.0279533	0.680008	0.164602	177.726	1.19204	195.379	7.34258	415.246	91.0748	177.726	1.19204	42.8002
070819BK-02 75	412.151	4965.72	2.95274	16.4653	4.69125	0.218511	5.70496	0.0270389	1.07393	0.188245	171.989	1.82262	200.67	10.3882	553.67	122.346	171.989	1.82262	31.0634
070819BK-02 76	560.008	4749.18	2.14774	17.7505	3.43272	0.21288	5.85729	0.0285918	1.05409	0.179963	181.729	1.88885	195.967	10.439	371.997	129.828	181.729	1.88885	48.8523
070819BK-02 77	641.59	13570.3	2.45327	18.093	2.73715	0.435026	3.12221	0.0574147	0.641054	0.20532	359.884	2.24383	366.739	9.61083	411.259	68.3435	359.884	2.24383	87.5078
070819BK-02 78	614.501	7846.75	1.73012	17.9106	2.25859	0.442382	3.23023	0.0586181	0.80005	0.247676	367.216	2.8558	371.931	10.0599	402.365	70.0992	367.216	2.8558	91.2645
070819BK-02 79	507.705	10679.1	1.8644	18.0683	3.21011	0.408458	3.99973	0.0540309	0.793739	0.198448	339.221	2.62292	347.764	11.7783	406.178	87.7695	339.221	2.62292	83.5155
070819BK-02 80	669.033	4525.98	2.39416	18.0584	3.68663	0.221339	6.51649	0.0303123	0.864999	0.13274	192.502	1.64053	203.023	11.9918	328.016	146.702	192.502	1.64053	58.6869
070819BK-02 81	264.341	28319	2.88515	8.82727	0.806948	5.24087	1.02961	0.331718	0.634896	0.616635	1846.7	10.1948	1859.29	8.77958	1874.16	14.6162	1874.16	14.6162	98.5348
070819BK-02 82	336.318	3021.75	3.17347	17.5242	4.43508	0.195426	4.96399	0.0267249	1.07727	0.217018	170.018	1.80761	181.248	8.24003	331.27	109.948	170.018	1.80761	51.3229
070819BK-02 83	1542.35	8722.7	3.89175	18.8144	3.18636	0.106066	3.69113	0.0147011	0.686345	0.185945	94.0798	0.641023	102.36	3.59406	300.73	82.7096	94.0798	0.641023	31.2838
070819BK-02 84	392.278	4689.32	1.80885	16.4619	5.36666	0.250286	6.01485	0.031003	1.007	0.167419	196.823	1.95206	226.808	12.2265	551.367	129.568	196.823	1.95206	35.6972
070819BK-02 85	912.746	4958.5	5.37014	17.0547	2.80236	0.1185	4.01249	0.0151935	0.76715	0.19119	97.2073	0.740131	113.712	4.31649	475.615	87.1239	97.2073	0.740131	20.4382
070819BK-02 86	342.938	3343.62	1.28696	15.7159	5.67999	0.223585	6.20536	0.0269283	1.02595	0.165333	171.295	1.73426	204.889	11.5139	612.364	132.319	171.295	1.73426	27.9727
070819BK-02 87	68.8946	651.92	2.95722	6.91481	28.2495	0.376861	29.0052	0.021671	4.90487	0.169103	138.208	6.7068	324.726	80.7814	2045.39	516.609	138.208	6.7068	6.75706
070819BK-02 88	658.265	9169.38	1.65671	17.4107	4.87014	0.229269	5.29397	0.0293605	0.858661	0.162196	186.545	1.57883	209.595	10.0259	478.269	115.54	186.545	1.57883	39.0041
070819BK-02 89	454.981	3362.23	3.45953	17.8588	4.06174	0.223612	6.11217	0.0310171	0.961402	0.157293	196.911	1.86448	204.912	11.3421	298.95	137.796	196.911	1.86448	65.8675
070819BK-02 90	719.579	5803.99	2.18954	17.6427	3.31161	0.222331	4.48072	0.0293996	0.843641	0.188282	186.79	1.55322	203.848	8.27559	406.966	98.5298	186.79	1.55322	45.898
070819BK-02 91	1256.99	4878.4	3.50808	18.7088	3.67283	0.105438	4.00048	0.0149722	0.907384	0.226819	95.8013	0.862858	101.784	3.87443	245.229	89.7582	95.8013	0.862858	39.0661
070819BK-02 92	607.953	8401.21	3.5824	17.144	5.2969	0.241955	5.7317	0.030619	0.67738	0.118181	194.421	1.29731	220.02	11.3386	504.502	125.348	194.421	1.29731	38.5373
070819BK-02 93	360.32	3526.79	1.6941	16.9094	4.93576	0.188044	6.90967	0.0244884	1.25356	0.181422	155.961	1.93161	174.959	11.1053	441.081	151.321	155.961	1.93161	35.3587
070819BK-02 94	658.372	4907.87	2.12994	17.5919	3.56011	0.225823	5.39258	0.0299742	0.96221	0.178432	190.387	1.80513	206.745	10.0874	398.521	118.97	190.387	1.80513	47.7733
070819BK-02 95	181.683	1835.55	1.4179	11.9563	8.8279	0.291096	10.6068	0.0275354	2.17434	0.204994	175.105	3.75612	259.422	24.2872	1113.56	207.806	175.105	3.75612	15.7248
070819BK-02 96	695.872	6363.78	6.22662	18.3812	2.62619	0.208537	4.07388	0.0287334	0.670119	0.164492	182.616	1.20657	192.324	7.13787	314.198	91.4453	182.616	1.20657	58.1212
070819BK-02 97	455.962	1894.9	1.71776	13.5381	8.0726	0.156566	9.2864	0.0169619	1.42117	0.153038	108.427	1.52804	147.693	12.7652	837.008	191.531	108.427	1.52804	12.9541
070819BK-02 98	92.8004	1125.88	25.9295	7.36358	19.0957	0.553414	21.3301	0.032048	2.02958	0.0951509	203.353	4.06279	447.231	77.3078	2032.97	380.335	203.353	4.06279	10.0027
070819BK-02 99	763.536	14980.2	2.9308	18.1971	1.5705	0.436461	2.01864	0.0580441	0.686075	0.33987	363.72	2.4263	367.754	6.22796	394.22	42.5716	363.72	2.4263	92.2631
070819BK-02 100	875.302	7145.53	1.97007	18.2216	2.98001	0.211207	3.29374	0.0287287	0.657516	0.199626	182.587	1.18369	194.565	5.83196	343.415	73.0565	182.587	1.18369	53.1679
070819BK-02 101	960.941	4251.97	2.52093	16.9364	6.18927	0.108353	7.39476	0.014002	1.00093	0.135356	89.6366	0.890989	104.458	7.34049	458.235	162.7	89.6366	0.890989	19.5613
070819BK-02 102	1049.17	5570.88	2.61714	16.3554	6.72672	0.131514	7.44942	0.0161878	0.830487	0.111483	103.518	0.852834	125.458	8.79177	565.175	161.442	103.518	0.852834	18.316
070819BK-02 103	544.316	26840.3	4.96784	13.0929	0.821559	1.93334	1.0608	0.18324	0.591649	0.55774	1084.65	5.90651	1092.7	7.0993	1109.61	17.5893	1109.61	17.5893	97.751
070819BK-02 104	356.781	3178.65	2.3458	15.3047	6.67602	0.263035	7.57749	0.0311117	0.949322	0.125282	197.502	1.8465	237.11	16.0247	651.326	161.597	197.502	1.8465	30.3231
[truncated: 498 more rows]

[truncated: 3 more sheets: 081019BK-01, CANT-DM1-COMP, CANT-PA1-COMP]
